# Supplementary material for: Evolutionary dynamics of genome size and content during the adaptive radiation of Heliconiini butterflies
Source: Research Square preprint supplement (doi:10.21203/rs.3.rs-2203028/v1), 2022-11-04
Supplement: Supplementary file 1 [file 480e6d28fd87e6c8a037f170.xlsx]

## Sheet: Table S1
																			TE					BUSCO insecta (1658)
Clade	Species	Tag	Seq method	Ref Genome	SubBioProject ids	Assembly ID (NCBI)	Already available SRA	# scf	N50 (kb > 10kb)	Assembly_size	Assembly_size_NoN	GC_level	Total CDS length (MB)	Median Intron lengths	Max Intron lengths	Total Intronic length (MB)	Masked_bp	Masked_%	Retroelements	DNA_transposons	Rolling-circles	Tot_intersp_rep	Unclassified	Complete (C)	Complete Single (S)	Complete Duplicated (D)	Fragmented (F)	Missing (M)	C%	S%	D%	F%	M%	# loci	# transcripts	CDS/cDNA ratio	Gene Density
Danaus	D. plexippus	Dple	Reference	-	-	Dpv3	-	1708	726.929	246.771	240.1	31.62	37.8914	129	264192	81.5893	9.57207	3.98671	6.99619	0.91661	1.65927	7.9128	0	1645	1609	36	10	3	99.2159	97.0446	2.17129	0.603136	0.180941	15373	24956	93.39	62.2967
Bicyclus	B. anynana	Bany	Reference	-	-	Bicyclus_anynana_v1.2	-	5027	665.997	472.613	466.832	36.46	51.9007	454	579875	199.299	42.6862	9.1438	19.3793	2.73939	22.1188	20.5674	0.000108	1632	1615	17	11	15	98.4318	97.4065	1.02533	0.01	0.01	15043	31040	73.31	31.8294
Melitaea	M. cinxia	Mcin	Reference	-	-	ilMelCinx1.1	-	31	17331.8	484.462	484.462	33.83	40.2265	252	505800	199.038	64.2403	13.2601	30.1365	7.50672	26.597	37.6433	4.6e-05	1601	1575	26	7	50	96.5621	94.994	1.56815	0.422195	3.01568	14872	25693	78.44	30.698
Junonia	J. coenia	Jcoe	Reference	-	-	SRR10765679	-	1130	1571.16	585.99	585.99	34.5	42.7456	250	342323	173.244	57.2558	9.77077	41.775	4.50521	10.9754	46.2804	0.000202	1633	1572	61	4	21	98.4922	94.813	3.67913	0.241255	1.26659	18746	30553	78.74	31.9903
Speyeria	S. mormonia ssp washingtonia	Smor	PacBioHiFi	-	PRJNA686707	-	This study	127	15666.4	452.557	452.557	32.22	67.8229	298	301642	223.052	57.7337	12.7572	14.7939	2.49324	40.4466	17.2872	5.4e-05	1655	1644	11	0	3	99.8191	99.1556	0.66345	0	0.180941	29265	48032	93.02	64.6659
Philaethria	Ph. dido	Pdid	Nanopore+10X	-	PRJNA686711	-	This study	6934	282.635	393.831	393.8	32.09	47.9019	285	273776	167.961	114.813	29.1551	74.1746	11.6348	29.0035	85.8094	0	1602	1593	9	27	29	96.6224	96.0796	0.542823	1.62847	1.7491	21636	36113	86.73	54.9373
Dryadula	Dr. phaetusa	Dpha	PacBio+IllPE+RNAseq	-	PRJNA686710	-	This study	191	6135.71	362.295	362.29	31.93	52.2863	257	172033	161.798	86.1822	23.7882	56.8152	11.0923	18.2747	67.9075	0.000132	1658	1644	14	0	0	100	99.1556	0.844391	0.01	0.01	16924	32637	80.6	46.7133
Dryas	Dy. iulia	Diul	Reference	-	-	Diul.assembly.v1.1	-	762	15232.6	440.278	440.232	31.74	51.6933	345	294148	206.056	139.747	31.744	80.6871	18.0036	41.0565	98.6907	6.1e-05	1647	1636	11	2	9	99.3366	98.6731	0.66345	0.120627	0.542823	17776	31514	84.45	40.3745
Podothricha	Po. telesiphe	Ptel	Nanopore+10X	-	PRJNA686708	-	This study	873	802.528	316.372	316.371	31.84	45.115	252	283439	175.633	64.8311	20.4921	32.135	12.9617	19.7341	45.097	0.000274	1620	1613	7	15	23	97.7081	97.2859	0.422195	0.904704	1.38721	15224	27779	84.24	48.1206
Dione	Di. juno	Djun	PacBio+10X+RNAseq	-	PRJNA686713	-	This study	372	6393.63	326.751	326.743	31.61	48.3336	201	149282	136.941	54.7918	16.7691	38.0538	4.17926	12.5587	42.2331	4.3e-05	1650	1644	7	4	4	99.5175	99.1556	0.422195	0.241255	0.241255	17022	31281	84.81	52.0947
Agraulis	A. vanillae incarnata (Florida)	Avfl	PacBio+lllPE	-	PRJNA686712	-	This study	1879	1121.58	404.518	404.371	31.69	67.2691	232	328138	199.708	78.0015	19.2896	60.0195	9.0355	8.94646	69.055	7.7e-05	1623	1617	6	12	23	97.889	97.5271	0.361882	0.723764	1.38721	29039	50323	90.55	71.7866
Agraulis	A. v. maculosa (Peru)	Avpe	IlluminaPE	-		-	ERR5235460	26510	989.476	307.161	299.717	31.29	49.1171	239	329586	136.527	43.729	14.5901	31.6898	4.60379	7.43545	36.2936	0	1423	1394	31	108	27	85.8263	84.0772	1.86972	6.51387	1.62847	19255	36528	87.32	62.6871
Agraulis	A. v. vanillae (Costa Rica)	Avcr	Nanopore+10X	-	PRJNA686712	-	This study	30915	179.061	406.947	405.77	32.05	56.0804	235	302570	135.655	75.7308	18.6635	57.6841	8.20983	9.83683	65.8939	0	1592	1576	16	43	23	96.0193	95.0543	0.965018	2.59349	1.38721	27636	44853	90.69	67.9106
Eueides	E. isabella	Eisa	Reference	-	-	ASM1904947v1	-	147	14722.4	440.152	440.098	33.45	41.2302	293	149374	171.964	131.165	29.8036	93.5944	11.6592	25.9115	105.254	0	1647	1628	19	2	9	99.3366	98.1906	1.14596	0.120627	0.542823	23246	27378	88.51	52.8135
Eueides	E. lampeto	Elam	IlluminaPE	Eisa		-	ERR5235459	52451	6425.99	262.74	255.851	32.63	34.4211	262	314350	91.208	66.4772	25.9828	41.9441	6.78843	17.7447	48.7325	0	999	989	10	281	378	60.2533	59.6502	0.603136	16.9481	22.7986	20689	36043	86.58	78.7431
Eueides	E. vibilia	Evib	IlluminaPE	Eisa		-	ERR5235454	41731	7872.66	270.177	264.183	32.61	43.4718	239	324355	116.248	64.7198	24.4981	40.7663	6.61098	17.3425	47.3773	0	1333	1324	9	171	154	80.3981	79.8552	0.542823	10.3136	9.2883	20693	36526	84.88	76.5906
Eueides	E. aliphera	Eali	IlluminaPE			-	ERR5235452	92630	2835.37	220.543	217.374	32.24	19.5587	211	269895	44.1966	56.1433	25.828	35.9404	5.15817	15.0446	41.0987	7.8e-05	572	569	3	459	627	34.4994	34.3185	0.180941	27.684	37.8166	20639	30221	89.72	93.5827
Eueides	E. tales	Etal	Reference+Curation	-		-	SRR8883890	21788	52.796	470.127	469.915	32.54	53.3477	298	203207	138.966	134.306	28.5808	83.8631	14.6003	35.8424	98.4634	0	1619	1593	26	28	11	97.6478	96.0796	1.56815	1.68878	0.66345	28361	47153	89.29	60.3262
Eueides	E. lybia	Elyb	IlluminaPE	Eisa		-	ERR5235468	93864	4996.81	307.618	303.488	31.99	30.0282	291	281563	84.2224	83.0759	27.3737	51.6573	8.1309	59.7882	23.2877	5.3e-05	964	951	13	353	341	58.1423	57.3583	0.784077	21.2907	20.5669	23002	35375	89.62	74.7745
Erato	Heliconius telesiphe	Htel	Reference+Curation	-		-	SRR8883900	20363	60.649	441.52	441.372	33.55	52.4461	271	198748	147.776	162.446	36.8047	83.9758	30.017	48.4527	113.993	6.8e-05	1597	1583	14	56	15	96.3209	95.4765	0.844391	3.37756	0.904704	25691	43569	86.04	58.1876
Erato	H. clysonymus	Hcly	IlluminaPE	Htel		-	SRR4032079	22327	58.268	290.635	281.35	39.85	34.0051	243	246653	98.2879	69.4851	24.697	38.873	10.9676	19.6445	49.8407	7.8e-05	1305	1298	7	198	155	78.7093	78.2871	0.422195	11.9421	9.34861	19620	31387	81.13	67.5074
Erato	H. hortense	Hhor	IlluminaPE	Htel		-	SRR4032054	50679	46.635	350.657	337.092	34.28	39.0592	240	278898	85.5484	95.8814	28.4437	50.6074	16.9192	28.3548	67.5266	0	1403	1394	9	193	62	84.62	84.0772	0.542823	11.6405	3.73945	28241	43014	85.52	80.5375
Erato	H. hecalesia	Hhec	Reference+Curation	-		-	SRR8883898	10239	113.96	372.084	371.926	33.33	36.9161	276	354870	149.911	122.452	32.9237	63.7805	21.2051	37.4664	84.9855	0	1636	1624	12	15	7	98.6731	97.9493	0.723764	0.904704	0.422195	19597	24984	82.58	52.6682
Erato	H. hermathena	Hher	Reference	-	-	ASM1340370v1	-	1912	501.66	391.646	387.611	33.42	54.8956	286	230345	193.36	135.616	34.9875	69.8121	24.6094	41.194	94.4215	0	1625	1622	3	20	13	98.0097	97.8287	0.180941	1.20627	0.784077	20040	36009	82.81	51.1686
Erato	H. erato petiverana	Hpet	IlluminaPE	Herd		-	SRR4032055	7423	8834.35	317.959	311.438	32.94	49.491	281	248496	170.401	92.1846	29.5996	47.2523	16.2681	28.6641	63.5204	0	1578	1571	7	43	37	95.1749	94.7527	0.422195	2.59349	2.2316	16171	30731	79.61	50.8587
Erato	H. erato demophoon	Herd	Reference	-	-	SRR8883904	-	196	10689	382.829	377.605	33.25	57.8107	298	450191	184.68	126.401	33.4745	63.0377	22.8874	40.4759	85.9252	5.8e-05	1637	1617	20	5	16	98.7334	97.5271	1.20627	0.301568	0.965018	15224	33766	74.11	39.7671
Erato	H. erato etylus	Heet	IlluminaPE	Herd		-	ERR5235453	17059	8788.66	344.949	333.799	32.84	35.9016	294	390350	164.941	101.249	30.3323	52.8421	17.3901	31.0167	70.2322	0	1369	1355	14	128	161	82.5694	81.725	0.844391	7.72014	9.71049	16184	25881	80.72	46.917
Erato	H. erato lativitta	Hlat	Reference	-		v1	-	142	5483.78	418.372	413.096	33.46	49.4486	256	312449	222.204	141.287	34.2021	69.3321	26.1118	45.8436	95.4438	0	1508	1491	17	31	119	90.953	89.9276	1.02533	1.86972	7.17732	20873	36489	79.34	49.891
Erato	H. himera	Hhim	Reference	-			-	5526	19600.3	408.472	386.644	31.79	52.8655	292	267673	213.283	129.861	33.5868	64.5329	23.7341	41.5944	88.267	0	1633	1609	24	15	10	98.4922	97.0446	1.44753	0.904704	0.603136	18299	32888	81.2	44.7986
Sara/Sapho	H. charithonia	Hcha	Reference	-		JAKFBP010000000	-	7501	12284.6	355.18	332.557	33.32	53.9159	263	251917	187.521	95.0466	28.5806	52.6291	14.3285	66.9577	28.0889	0	1637	1621	16	16	6	98.7334	97.7684	0.965018	0.965018	0.361882	19931	35201	83.93	56.1152
Sara/Sapho	H. peruvianus	Hper	IlluminaPE	Hcha		-	ERR5235458	23684	6278.38	317.218	311.323	34.38	48.8997	234	316827	121.479	79.2778	25.4648	43.0464	12.7672	23.4639	55.8139	0.000308	1535	1524	11	89	34	92.5814	91.918	0.66345	5.36791	2.05066	26854	44100	85.66	84.6546
Sara/Sapho	H. eratosignis	Hert	IlluminaPE	Hcha		-	ERR5235467	5404	12858.1	355.67	352.952	33.08	52.0656	282	338797	201.016	111.005	31.4504	56.5376	19.0611	75.5986	35.4059	0	1649	1639	10	4	5	99.4572	98.854	0.603136	0.241255	0.301568	15643	30172	80.3	43.9818
Sara/Sapho	H. demeter	Hdem	Reference+Curation	-		-	SRR8883893	9715	119.507	356.278	356.122	33.18	49.7508	273	351059	149.228	113.827	31.9628	56.9895	19.2165	37.6206	76.206	0	1627	1612	15	24	7	98.1303	97.2256	0.904704	1.44753	0.422195	19502	34070	82.61	54.7381
Sara/Sapho	H. ricini	Hric	IlluminaPE	Hcha		-	SRR4032011	14750	12711.4	263.893	258.315	32.69	39.4726	248	381710	130.998	68.9399	26.6883	36.5869	11.3563	47.9434	20.9965	0.000157	1365	1360	5	147	146	82.3281	82.0265	0.301568	8.8661	8.80579	15406	28925	79.75	58.3797
Sara/Sapho	H. leucadia	Hleu	IlluminaPE	Hcha		-	ERR5235456	37414	6784.73	293.879	291.493	34.56	37.9763	242	397971	102.837	76.8808	26.3748	41.2783	12.6371	22.9653	53.9155	0	1409	1399	10	165	84	84.9819	84.3788	0.603136	9.95175	5.06634	23940	38073	82.61	81.4622
Sara/Sapho	H. sara	Hsar	Reference	-	-	iHelSar1.1	-	399	17766.6	348.892	348.85	33.21	52.6971	271	183373	158.974	105.924	30.3638	57.1495	15.4373	33.3372	72.5869	0	1651	1646	5	4	3	99.5778	99.2762	0.301568	0.241255	0.180941	16066	31442	79.99	46.0486
Sara/Sapho	H. antiochus	Hant	IlluminaPE	Hsar		-	ERR5235455	52206	6881.71	340.076	317.279	33.49	42.6114	218	308913	104.854	83.2158	26.2279	44.6811	13.6952	24.8395	58.3763	0	1535	1527	8	98	25	92.5814	92.0989	0.482509	5.91074	1.50784	24899	40508	83.12	73.2161
Sara/Sapho	H. eleuchia	Hele	IlluminaPE	Hsar		-	SRR3102171	21706	8403.87	325.186	306.695	33.64	44.7297	258	259567	133.582	81.4797	26.567	43.7822	13.4061	24.2914	57.1883	3.7e-05	1607	1601	6	38	13	96.924	96.5621	0.361882	2.29192	0.784077	19705	34330	80.84	60.596
Sara/Sapho	H. congener	Hcon	IlluminaPE	Hsar		-	SRR3102172	14747	9124.3	321.385	312.203	33.51	47.1978	258	273381	144.446	83.7703	26.832	45.1404	13.6769	24.953	58.8173	3.7e-05	1631	1623	8	21	6	98.3715	97.889	0.482509	1.26659	0.361882	18705	33002	80.77	58.2012
Sara/Sapho	H. hewitsoni	Hhew	IlluminaPE	Hsar		-	SRR3102337	16304	8600.56	318.829	311.412	33.06	47.4991	258	489563	140.008	84.0961	27.0047	45.3301	13.7522	25.0138	59.0823	0	1637	1631	6	16	5	98.7334	98.3715	0.361882	0.965018	0.301568	18144	31901	81.32	56.9082
Sara/Sapho	H. sapho	Hsap	IlluminaPE	Hsar		-	ERR266262	21612	7373.5	317.235	312.08	33.35	39.5055	257	260730	126.138	84.4131	27.0485	45.2488	13.8995	25.2648	59.1483	0	1537	1528	9	80	41	92.7021	92.1592	0.542823	4.82509	2.47286	20268	33863	81.63	63.8895
Aoede	H. aoede	Haoe	10X	-	PRJNA686714		This study	3120	798.91	242.555	240.194	32.89	44.1767	243	210397	114.846	48.8479	20.3368	26.9933	7.13602	14.7186	34.1294	0	1614	1602	12	25	19	97.3462	96.6224	0.723764	1.50784	1.14596	16206	28055	84.54	66.8138
Doris	H. hecuba flava	Hheb	IlluminaPE	Hdor		-	ERR1143583	19502	1558.85	309.04	303.207	33.72	43.7972	263	274898	145.941	79.5115	26.2235	43.633	11.6687	24.2096	55.3019	0.000146	1541	1530	11	95	22	92.9433	92.2799	0.66345	5.72979	1.3269	20408	34222	83.74	66.0368
Doris	H. hierax	Hhie	IlluminaPE	Hdor		-	ERR1143585	25652	1136.18	222.805	213.475	34.19	31.4765	247	335905	95.281	54.8155	25.6778	30.2575	7.91266	16.6454	38.1701	0	1267	1259	8	228	163	76.4174	75.9349	0.482509	13.7515	9.83112	16726	26235	84.27	75.0702
Doris	H. xanthocles	Hxan	IlluminaPE	Hdor		-	ERR1143626	13269	1668.03	394.914	375.847	34.81	49.7871	278	276235	181.983	126.418	33.6356	76.6058	19.0471	30.7655	95.6529	1.4e-05	1592	1583	9	48	18	96.0193	95.4765	0.542823	2.89505	1.08565	22989	38321	87.13	58.2127
Doris	H. doris	Hdor	10X	-	PRJNA686715		This study	13861	1670.63	395.297	376.288	34.72	49.6582	276	276486	183.321	126.005	33.4864	76.4072	18.9918	30.6062	95.3991	0.000109	1592	1569	23	48	18	96.0193	94.6321	1.38721	2.89505	1.08565	23145	38476	87.05	58.5509
Wallacei	H. egeria	Hege	IlluminaPE	Hbur		-	ERR5235461	6118	7190.01	342.635	342.452	33.86	48.8772	273	285675	148.808	101.601	29.6686	53.4182	16.8495	31.3331	70.2676	0	1637	1615	22	13	8	98.7334	97.4065	1.3269	0.784077	0.482509	18353	32198	84.28	53.5642
Wallacei	H. burneyi	Hbur	Reference+Curation	-		-	SRR8883892	5151	7295.36	338.132	337.978	33.72	47.8587	273	283890	159.588	99.2865	29.3766	52.1632	16.4206	30.7026	68.5839	0.000107	1631	1606	25	12	15	98.3715	96.8637	1.50784	0.723764	0.904704	17993	31677	83.4	53.2129
Wallacei	H. wallacei	Hwal	IlluminaPE	Hbur		-	ERR1143625	31703	3786.84	328.969	318.625	34.33	41.9782	253	256853	115.778	82.1867	25.7942	43.0847	12.1943	26.9077	55.279	0	1604	1594	10	45	9	96.7431	96.1399	0.603136	2.71411	0.542823	21262	34982	82.77	64.6322
Melpomene	H. nattereri	Hnat	Reference	-	-	ASM1340364v1	-	250	8841.71	275.868	273.989	32.98	36.69	241	282665	164.3	70.7142	25.8091	36.0052	11.3194	47.3247	23.3895	0	1637	1627	10	12	9	98.7334	98.1303	0.603136	0.723764	0.542823	16677	21938	79.04	60.4528
Silvaniformis	H. besckei	Hbes	Reference+Curation	-		-	SRR8883889	9110	4174.09	283.088	282.921	32.8	34.6761	232	285222	126.415	76.4432	27.0193	34.2629	12.4017	29.7786	46.6646	4.8e-05	1624	1613	11	28	6	97.9493	97.2859	0.66345	1.68878	0.361882	17400	23397	80.08	61.4649
Silvaniformis	H. numata	Hnum	Reference+Curation	-		-	SRR8883908	7272	4370.95	288.595	288.383	32.67	50.1937	240	281393	131.349	74.426	25.808	32.9821	13.864	27.5799	46.8461	5e-05	1641	1614	27	14	3	98.9747	97.3462	1.62847	0.844391	0.180941	18997	32775	81.78	65.8258
Silvaniformis	H. ismenius	Hism	IlluminaPE	Hmel		-	ERR1143586	19063	7536.92	245.987	242.858	33.22	49.2738	228	331809	111.33	47.0321	19.3661	24.8991	6.6208	15.5123	31.5199	0	1642	1630	12	9	7	99.035	98.3112	0.723764	0.542823	0.422195	20112	35250	80.38	81.7606
Silvaniformis	H. ethilla	Heth	IlluminaPE	Hmel		-	ERR260305	30586	6372	226	221	38.73	44.7671	221	569947	92.5266	38.2221	17.2951	20.9243	5.17448	12.1233	26.0988	0	1494	1485	9	100	64	90.1086	89.5657	0.542823	6.03136	3.86007	19801	36067	78.91	87.615
Silvaniformis	H. pardalinus sergestus	Hpar	Reference+Curation	-		-	SRR8883891	19577	60.011	347.889	347.715	32.78	50.9904	239	330390	125.951	100.841	29.0009	41.3532	17.0894	42.3979	58.4426	0	1621	1577	44	26	11	97.7684	95.1146	2.6538	1.56815	0.66345	23643	38677	84.21	67.9614
Silvaniformis	H. elevatus	Helv	Reference+Curation	-		-	SRR8883894	11729	62.88	314.351	314.17	32.71	48.6172	242	310442	124.045	86.0536	27.3908	36.0882	14.3184	35.647	50.4066	0	1583	1538	45	28	47	95.4765	92.7624	2.71411	1.68878	2.83474	21743	36489	82.46	69.1678
Silvaniformis	H. atthis	Hatt	IlluminaPE	Hmel		-	ERR5235451	18378	7127.74	235	233.162	33.96	44.6628	226	362124	113.058	45.3664	19.457	23.9428	6.29848	15.1251	30.2413	0	1616	1608	8	25	17	97.4668	96.9843	0.482509	1.50784	1.02533	18932	32564	79.43	80.5616
Silvaniformis	H. hecale	Hhel	Reference+Curation	-		-	SRR8883896	10052	93.415	281.439	281.253	32.71	47.8297	237	322483	122.037	73.0659	25.9787	32.1732	12.2871	28.6056	44.4603	0	1621	1609	12	15	22	97.7684	97.0446	0.723764	0.904704	1.3269	19472	33326	81.87	69.1874
Melpomene	H. melpomene melpomene	Hmel	Reference	-	-	Hmel2.5	-	332	14308.9	275.246	274.213	32.8	50.0304	238	192419	141.278	71.2505	25.9836	32.8498	12.1109	26.2897	44.9608	5.2e-05	1646	1630	16	5	7	99.2762	98.3112	0.965018	0.301568	0.422195	18087	29303	72.23	65.7122
Melpomene	H. cydno	Hcyd	Reference	-	-	https://osf.io/3z9tg/	-	58	13724.1	261.056	252.901	32.61	41.793	240	146061	131.821	57.5538	22.7574	27.3255	8.72875	22.3049	36.0543	5.2e-05	1637	1630	7	5	16	98.7334	98.3112	0.422195	0.301568	0.965018	13266	22779	70.15	50.8166
Melpomene	H. pachinus	Hpac	IlluminaPE	Hmel		-	ERS977714	46193	7290.21	283.697	278.058	35.01	57.0823	200	211816	101.949	53.2428	19.148	28.8156	7.29753	17.129	36.1138	0.000677	1626	1616	10	20	12	98.07	97.4668	0.603136	1.20627	0.723764	31293	52401	84.69	110.304
Melpomene	H. heurippa	Hheu	IlluminaPE	Hmel		-	ERR3653294	25945	8456.97	273.311	259.761	34.09	49.1426	232	274645	118.442	52.0093	20.022	27.5993	7.31356	34.9129	17.0964	5.2e-05	1586	1575	11	40	32	95.6574	94.994	0.66345	2.41255	1.93004	21246	37947	79.55	77.7356
Melpomene	H. timareta	Htim	IlluminaPE	Hmel		-	SRR3102172	21089	10631.8	331.967	330.311	33.28	58.4433	235	753682	154.324	77.6851	23.5188	37.2201	11.8889	28.576	49.1091	5.4e-05	1630	1517	113	11	17	98.3112	91.4958	6.81544	0.66345	1.02533	25814	43385	83.51	77.7608

## Sheet: Table S2
Species	SpTag	Sex	Stage	Tissue	Tag	SRA	BioProject
E. isabella	Eisa	-	Adult	Multiple tissue pooled	-	SRR13261078	PRJNA685624
H. cydno	Hcyd	Female	Adult	Abdomen	FaAbd	SRR2076788	PRJNA283415
H. cydno	Hcyd	Female	Adult	Abdomen	FaAbd	SRR2076786	PRJNA283415
H. cydno	Hcyd	Female	Adult	Abdomen	FaAbd	SRR2076784	PRJNA283415
H. cydno	Hcyd	Female	Adult	Abdomen	FaAbd	SRR2076778	PRJNA283415
H. cydno	Hcyd	Female	Adult	Abdomen	FaAbd	SRR2076776	PRJNA283415
H. cydno	Hcyd	Female	Adult	Head	FaHed	SRR2076789	PRJNA283415
H. cydno	Hcyd	Female	Adult	Head	FaHed	SRR2076787	PRJNA283415
H. cydno	Hcyd	Female	Adult	Head	FaHed	SRR2076785	PRJNA283415
H. cydno	Hcyd	Female	Adult	Head	FaHed	SRR2076779	PRJNA283415
H. cydno	Hcyd	Female	Adult	Head	FaHed	SRR2076777	PRJNA283415
H. cydno	Hcyd	Male	Adult	Abdomen	MaAbd	SRR2076792	PRJNA283415
H. cydno	Hcyd	Male	Adult	Abdomen	MaAbd	SRR2076790	PRJNA283415
H. cydno	Hcyd	Male	Adult	Abdomen	MaAbd	SRR2076782	PRJNA283415
H. cydno	Hcyd	Male	Adult	Abdomen	MaAbd	SRR2076780	PRJNA283415
H. cydno	Hcyd	Male	Adult	Abdomen	MaAbd	SRR2076774	PRJNA283415
H. cydno	Hcyd	Male	Adult	Head	MaHed	SRR2076793	PRJNA283415
H. cydno	Hcyd	Male	Adult	Head	MaHed	SRR2076791	PRJNA283415
H. cydno	Hcyd	Male	Adult	Head	MaHed	SRR2076783	PRJNA283415
H. cydno	Hcyd	Male	Adult	Head	MaHed	SRR2076781	PRJNA283415
H. cydno	Hcyd	Male	Adult	Head	MaHed	SRR2076775	PRJNA283415
H. doris	Hdor	Female	Adult	Antennae	MaAnt	ERR841725	PRJEB9022
H. doris	Hdor	Female	Adult	Legs	FaLeg	ERR841730	PRJEB9022
H. doris	Hdor	Female	Adult	Mouthparts	FaMot	ERR841736	PRJEB9022
H. doris	Hdor	Male	Adult	Antennae	MaAnt	ERR841734	PRJEB9022
H. doris	Hdor	Male	Adult	Legs	MaLeg	ERR841726	PRJEB9022
H. doris	Hdor	Male	Adult	Mouthparts	MaMot	ERR841716	PRJEB9022
H. erato	Herd	-	Eggs	-	Eggs	SRR4032915	PRJNA324415
H. erato	Herd	-	Eggs	-	Eggs	SRR4032904	PRJNA324415
H. erato	Herd	-	Eggs	-	Eggs	SRR4032898	PRJNA324415
H. erato	Herd	-	Adult	Abdomen	aAbd	SRR4032910	PRJNA324415
H. erato	Herd	-	Adult	Abdomen	aAbd	SRR4032905	PRJNA324415
H. erato	Herd	-	Pupe Day 1	Body	p1bd	SRR4032908	PRJNA324415
H. erato	Herd	-	Pupe Day 9	Body	p9Bd	SRR4032903	PRJNA324415
H. erato	Herd	-	5th instar	Body	l5Bd	SRR4032902	PRJNA324415
H. erato	Herd	-	Pupe Day 5	Body	p5Bd	SRR4032901	PRJNA324415
H. erato	Herd	-	4th instar	Body	l4Bd	SRR4032899	PRJNA324415
H. erato	Herd	-	Adult	Eye	aEye	SRR4032906	PRJNA324415
H. erato	Herd	-	4th instar	Gut	l4Gut	SRR4032900	PRJNA324415
H. erato	Herd	-	Adult	Head	aHead	SRR4032911	PRJNA324415
H. erato	Herd	-	Adult	Head	aHead	SRR4032907	PRJNA324415
H. erato	Herd	-	Pupe Day 3	Hindwing	p3Hwin	SRR616691	PRJNA179292
H. erato	Herd	-	Pupe Day 3	Hindwing	p3Hwin	SRR616690	PRJNA179292
H. erato	Herd	-	Pupe Day 3	Hindwing	p3Hwin	SRR616689	PRJNA179292
H. erato	Herd	-	Pupe Day 3	Hindwing	p3Hwin	SRR616688	PRJNA179292
H. erato	Herd	-	Pupe Day 3	Hindwing	p3Hwin	SRR616687	PRJNA179292
H. erato	Herd	-	Pupe Day 3	Hindwing	p3Hwin	SRR616686	PRJNA179292
H. erato	Herd	-	Pupe Day 1	Hindwing	p3Hwin	SRR616685	PRJNA179292
H. erato	Herd	-	Pupe Day 1	Hindwing	p3Hwin	SRR616684	PRJNA179292
H. erato	Herd	-	Pupe Day 1	Hindwing	p3Hwin	SRR616683	PRJNA179292
H. erato	Herd	-	Pupe Day 1	Hindwing	p3Hwin	SRR616682	PRJNA179292
H. erato	Herd	-	Pupe Day 1	Hindwing	p3Hwin	SRR616681	PRJNA179292
H. erato	Herd	-	Pupe Day 1	Hindwing	p3Hwin	SRR616680	PRJNA179292
H. erato	Herd	-	5th instar	Hindwing	l5Hwin	SRR616679	PRJNA179292
H. erato	Herd	-	5th instar	Hindwing	l5Hwin	SRR616678	PRJNA179292
H. erato	Herd	-	5th instar	Hindwing	l5Hwin	SRR616677	PRJNA179292
H. erato	Herd	-	5th instar	Hindwing	l5Hwin	SRR616676	PRJNA179292
H. erato	Herd	-	5th instar	Hindwing	l5Hwin	SRR616675	PRJNA179292
H. erato	Herd	-	5th instar	Hindwing	l5Hwin	SRR616674	PRJNA179292
H. erato	Herd	-	36h_larva	hindwing	l36Hwin	SRR4032919	PRJNA324415
H. erato	Herd	-	36h_larva	hindwing	l36Hwin	SRR4032918	PRJNA324415
H. erato	Herd	-	36h_larva	hindwing	l36Hwin	SRR4032896	PRJNA324415
H. erato	Herd	-	Adult	Thorax	aThx	SRR4032912	PRJNA324415
H. erato	Herd	-	Adult	Thorax	aThx	SRR4032909	PRJNA324415
H. erato	Herd	-	3rd instar	Whole	l3Who	SRR4032920	PRJNA324415
H. erato	Herd	-	Pupe Day 3	Whole	p3Who	SRR4032917	PRJNA324415
H. erato	Herd	-	2nd instar	Whole	l2Who	SRR4032916	PRJNA324415
H. erato	Herd	-	1st instar	Whole	l1Who	SRR4032914	PRJNA324415
H. erato	Herd	-	Prepupae	Wing	prWing	SRR4032913	PRJNA324415
H. erato	Herd	-	Prepupae	Wing	prWing	SRR4032897	PRJNA324415
H. erato	Herd	-	Adult	Wing	aWing	SRR6763672	PRJNA435610
H. erato	Herd	-	Adult	Wing	aWing	SRR6763671	PRJNA435610
H. erato	Herd	-	Adult	Wing	aWing	SRR6763670	PRJNA435610
H. erato	Herd	-	Adult	Wing	aWing	SRR6763669	PRJNA435610
H. erato	Herd	-	Adult	Wing	aWing	SRR6763668	PRJNA435610
H. erato	Herd	-	Adult	Wing	aWing	SRR6763667	PRJNA435610
H. erato	Herd	-	Adult	Wing	aWing	SRR6763666	PRJNA435610
H. erato	Herd	-	Adult	Wing	aWing	SRR6763665	PRJNA435610
H. erato	Herd	-	Adult	Wing	aWing	SRR6763664	PRJNA435610
H. erato	Herd	-	Adult	Wing	aWing	SRR6763663	PRJNA435610
H. erato	Herd	-	Adult	Wing	aWing	SRR6763662	PRJNA435610
H. erato	Herd	-	Adult	Wing	aWing	SRR6763661	PRJNA435610
H. erato	Herd	-	Adult	Wing	aWing	SRR6763660	PRJNA435610
H. erato	Herd	-	Adult	Wing	aWing	SRR6763659	PRJNA435610
H. erato	Herd	-	Adult	Wing	aWing	SRR6763658	PRJNA435610
H. erato	Herd	-	Adult	Wing	aWing	SRR6763657	PRJNA435610
H. erato	Herd	-	Adult	Wing	aWing	SRR6763656	PRJNA435610
H. erato	Herd	-	Adult	Wing	aWing	SRR6763655	PRJNA435610
H. erato	Herd	Female	Adult	Abdomen	FaAbd	SRR2076812	PRJNA283415
H. erato	Herd	Female	Adult	Abdomen	FaAbd	SRR2076808	PRJNA283415
H. erato	Herd	Female	Adult	Abdomen	FaAbd	SRR2076806	PRJNA283415
H. erato	Herd	Female	Adult	Abdomen	FaAbd	SRR2076804	PRJNA283415
H. erato	Herd	Female	Adult	Abdomen	FaAbd	SRR2076798	PRJNA283415
H. erato	Herd	Female	Adult	Antennae	MaAnt	ERR841724	PRJEB9022
H. erato	Herd	Female	Adult	Head	FaHed	SRR2076813	PRJNA283415
H. erato	Herd	Female	Adult	Head	FaHed	SRR2076809	PRJNA283415
H. erato	Herd	Female	Adult	Head	FaHed	SRR2076807	PRJNA283415
H. erato	Herd	Female	Adult	Head	FaHed	SRR2076805	PRJNA283415
H. erato	Herd	Female	Adult	Head	FaHed	SRR2076799	PRJNA283415
H. erato	Herd	Female	Adult	Legs	FaLeg	ERR841714	PRJEB9022
H. erato	Herd	Female	Adult	Mouthparts	FaMot	ERR841735	PRJEB9022
H. erato	Herd	Female	Adult	Mouthparts	FaMot	ERR841732	PRJEB9022
H. erato	Herd	Male	Adult	Abdomen	MaAbd	SRR2076810	PRJNA283415
H. erato	Herd	Male	Adult	Abdomen	MaAbd	SRR2076802	PRJNA283415
H. erato	Herd	Male	Adult	Abdomen	MaAbd	SRR2076800	PRJNA283415
H. erato	Herd	Male	Adult	Abdomen	MaAbd	SRR2076796	PRJNA283415
H. erato	Herd	Male	Adult	Abdomen	MaAbd	SRR2076794	PRJNA283415
H. erato	Herd	Male	Adult	Antennae	MaAnt	ERR841718	PRJEB9022
H. erato	Herd	Male	Adult	Head	MaHed	SRR2076811	PRJNA283415
H. erato	Herd	Male	Adult	Head	MaHed	SRR2076803	PRJNA283415
H. erato	Herd	Male	Adult	Head	MaHed	SRR2076801	PRJNA283415
H. erato	Herd	Male	Adult	Head	MaHed	SRR2076797	PRJNA283415
H. erato	Herd	Male	Adult	Head	MaHed	SRR2076795	PRJNA283415
H. erato	Herd	Male	Adult	Legs	MaLeg	ERR841719	PRJEB9022
H. melpomene aglaope	Hmel	-	48hrs_post-pupation	Hindwing	aHwi	ERR053966	PRJEB2745
H. melpomene aglaope	Hmel	-	48hrs_post-pupation	Hindwing	aHwi	ERR053967	PRJEB2745
H. melpomene aglaope	Hmel	-	48hrs_post-pupation	Hindwing	aHwi	ERR053968	PRJEB2745
H. melpomene aglaope	Hmel	-	crawler_stage_pre-pupation	Hindwing	lHwi	ERR053969	PRJEB2745
H. melpomene aglaope	Hmel	-	crawler_stage_pre-pupation	Hindwing	lHwi	ERR053970	PRJEB2745
H. melpomene aglaope	Hmel	-	crawler_stage_pre-pupation	Hindwing	lHwi	ERR053971	PRJEB2745
H. melpomene aglaope	Hmel	-	48hrs_post-pupation	Hindwing	aHwi	ERR053972	PRJEB2745
H. melpomene aglaope	Hmel	-	48hrs_post-pupation	Hindwing	aHwi	ERR053973	PRJEB2745
H. melpomene aglaope	Hmel	-	48hrs_post-pupation	Hindwing	aHwi	ERR053974	PRJEB2745
H. melpomene aglaope	Hmel	-	crawler_stage_pre-pupation	Hindwing	lHwi	ERR053975	PRJEB2745
H. melpomene amaryllis	Hmel	-	crawler_stage_pre-pupation	Hindwing	lHwi	ERR053976	PRJEB2745
H. melpomene amaryllis	Hmel	-	crawler_stage_pre-pupation	Hindwing	lHwi	ERR053977	PRJEB2745
H. melpomene amaryllis	Hmel	-	crawler_stage_pre-pupation	Hindwing	lHwi	ERR053978	PRJEB2745
H. melpomene amaryllis	Hmel	-	crawler_stage_pre-pupation	Hindwing	lHwi	ERR053979	PRJEB2745
H. melpomene rosina	Hmel	-	Eggs	-	Eggs	SRR349680	PRJNA73601
H. melpomene rosina	Hmel	-	Adult	Abdomen	aAbd	ERR053980	PRJEB2745
H. melpomene rosina	Hmel	-	Adult	Abdomen	aAbd	ERR053981	PRJEB2745
H. melpomene rosina	Hmel	-	Adult	Abdomen	aAbd	ERR053982	PRJEB2745
H. melpomene rosina	Hmel	-	Adult	Abdomen	aAbd	ERR053983	PRJEB2745
H. melpomene rosina	Hmel	-	Adult	Abdomen	aAbd	ERR053984	PRJEB2745
H. melpomene rosina	Hmel	-	Adult	Abdomen	aAbd	ERR053985	PRJEB2745
H. melpomene rosina	Hmel	-	Adult	Abdomen	aAbd	ERR053986	PRJEB2745
H. melpomene rosina	Hmel	-	Adult	Abdomen	aAbd	ERR053987	PRJEB2745
H. melpomene rosina	Hmel	-	Adult	Abdomen	aAbd	ERR053988	PRJEB2745
H. melpomene rosina	Hmel	-	Adult	Abdomen	aAbd	ERR053989	PRJEB2745
H. melpomene rosina	Hmel	-	Adult	Abdomen	aAbd	ERR053990	PRJEB2745
H. melpomene rosina	Hmel	-	Adult	Abdomen	aAbd	ERR053991	PRJEB2745
H. melpomene rosina	Hmel	-	Adult	Abdomen	aAbd	ERR053992	PRJEB2745
H. melpomene rosina	Hmel	-	Adult	Abdomen	aAbd	ERR053993	PRJEB2745
H. melpomene rosina	Hmel	-	-	Body	Body	SRR349681	PRJNA73601
H. melpomene rosina	Hmel	-	-	Body	Body	SRR349678	PRJNA73601
H. melpomene rosina	Hmel	-	-	Brain	Brain	SRR349679	PRJNA73601
H. melpomene rosina	Hmel	-	Larva	Gut	lGut	SRR3474191	PRJNA320452
H. melpomene rosina	Hmel	-	Larva	Gut	lGut	SRR3474189	PRJNA320452
H. melpomene rosina	Hmel	-	Larva	Gut	lGut	SRR3474188	PRJNA320452
H. melpomene rosina	Hmel	-	Larva	Gut	lGut	SRR3474186	PRJNA320452
H. melpomene rosina	Hmel	-	Larva	Gut	lGut	SRR3474184	PRJNA320452
H. melpomene rosina	Hmel	-	Larva	Gut	lGut	SRR3474183	PRJNA320452
H. melpomene rosina	Hmel	-	Larva	Gut	lGut	SRR3474181	PRJNA320452
H. melpomene rosina	Hmel	-	Larva	Gut	lGut	SRR3474180	PRJNA320452
H. melpomene rosina	Hmel	-	Larva	Gut	lGut	SRR3474178	PRJNA320452
H. melpomene rosina	Hmel	-	Larva	Gut	lGut	SRR3474177	PRJNA320452
H. melpomene rosina	Hmel	Female	Adult	Abdomen	FaAbd	SRR2076766	PRJNA283415
H. melpomene rosina	Hmel	Female	Adult	Abdomen	FaAbd	SRR2076764	PRJNA283415
H. melpomene rosina	Hmel	Female	Adult	Abdomen	FaAbd	SRR2076760	PRJNA283415
H. melpomene rosina	Hmel	Female	Adult	Abdomen	FaAbd	SRR2076758	PRJNA283415
H. melpomene rosina	Hmel	Female	Adult	Abdomen	FaAbd	SRR2076754	PRJNA283415
H. melpomene rosina	Hmel	Female	Adult	Antennae	FaAnt	ERS216969	PRJEB1499
H. melpomene rosina	Hmel	Female	Adult	Antennae	FaAnt	ERS216965	PRJEB1499
H. melpomene rosina	Hmel	Female	Adult	Antennae	FaAnt	ERR232462	PRJEB1499
H. melpomene rosina	Hmel	Female	Adult	Antennae	FaAnt	ERR232458	PRJEB1499
H. melpomene rosina	Hmel	Female	Adult	Antennae	FaAnt	ERR232451	PRJEB1499
H. melpomene rosina	Hmel	Female	Adult	Antennae	FaAnt	ERR232446	PRJEB1499
H. melpomene rosina	Hmel	Female	Adult	Antennae	FaAnt	ERR2206057	PRJEB23665
H. melpomene rosina	Hmel	Female	Adult	eye_and_brain	FaEBr	ERR2206060	PRJEB23665
H. melpomene rosina	Hmel	Female	Adult	eye_and_brain	FaEBr	ERR2206061	PRJEB23665
H. melpomene rosina	Hmel	Female	Adult	Head	FaHed	SRR2076767	PRJNA283415
H. melpomene rosina	Hmel	Female	Adult	Head	FaHed	SRR2076765	PRJNA283415
H. melpomene rosina	Hmel	Female	Adult	Head	FaHed	SRR2076761	PRJNA283415
H. melpomene rosina	Hmel	Female	Adult	Head	FaHed	SRR2076759	PRJNA283415
H. melpomene rosina	Hmel	Female	Adult	Head	FaHed	SRR2076755	PRJNA283415
H. melpomene rosina	Hmel	Female	Adult	Labial_palps_proboscis	FaLPP	ERS216968	PRJEB1499
H. melpomene rosina	Hmel	Female	Adult	Labial_palps_proboscis	FaLPP	ERS216963	PRJEB1499
H. melpomene rosina	Hmel	Female	Adult	Labial_palps_proboscis	FaLPP	ERR232457	PRJEB1499
H. melpomene rosina	Hmel	Female	Adult	Labial_palps_proboscis	FaLPP	ERR232452	PRJEB1499
H. melpomene rosina	Hmel	Female	Adult	Labial_palps_proboscis	FaLPP	ERR232445	PRJEB1499
H. melpomene rosina	Hmel	Female	Adult	Labial_palps_proboscis	FaLPP	ERR2206064	PRJEB23665
H. melpomene rosina	Hmel	Female	Adult	Legs	FaLeg	ERS216972	PRJEB1499
H. melpomene rosina	Hmel	Female	Adult	Legs	FaLeg	ERS216971	PRJEB1499
H. melpomene rosina	Hmel	Female	Adult	Legs	FaLeg	ERR232463	PRJEB1499
H. melpomene rosina	Hmel	Female	Adult	Legs	FaLeg	ERR232456	PRJEB1499
H. melpomene rosina	Hmel	Female	Adult	Legs	FaLeg	ERR232444	PRJEB1499
H. melpomene rosina	Hmel	Female	Adult	Legs	FaLeg	ERR2206063	PRJEB23665
H. melpomene rosina	Hmel	Male	Adult	Abdomen	MaAbd	SRR2076772	PRJNA283415
H. melpomene rosina	Hmel	Male	Adult	Abdomen	MaAbd	SRR2076770	PRJNA283415
H. melpomene rosina	Hmel	Male	Adult	Abdomen	MaAbd	SRR2076768	PRJNA283415
H. melpomene rosina	Hmel	Male	Adult	Abdomen	MaAbd	SRR2076762	PRJNA283415
H. melpomene rosina	Hmel	Male	Adult	Abdomen	MaAbd	SRR2076756	PRJNA283415
H. melpomene rosina	Hmel	Male	Adult	Antennae	MaAnt	ERS216960	PRJEB1499
H. melpomene rosina	Hmel	Male	Adult	Antennae	MaAnt	ERS216959	PRJEB1499
H. melpomene rosina	Hmel	Male	Adult	Antennae	MaAnt	ERR232466	PRJEB1499
H. melpomene rosina	Hmel	Male	Adult	Antennae	MaAnt	ERR232465	PRJEB1499
H. melpomene rosina	Hmel	Male	Adult	Antennae	MaAnt	ERR2206056	PRJEB23665
H. melpomene rosina	Hmel	Male	Adult	eye_and_brain	MaEBr	ERR2206058	PRJEB23665
H. melpomene rosina	Hmel	Male	Adult	eye_and_brain	MaEBr	ERR2206059	PRJEB23665
H. melpomene rosina	Hmel	Male	Adult	Head	MaHed	SRR2076773	PRJNA283415
H. melpomene rosina	Hmel	Male	Adult	Head	MaHed	SRR2076771	PRJNA283415
H. melpomene rosina	Hmel	Male	Adult	Head	MaHed	SRR2076769	PRJNA283415
H. melpomene rosina	Hmel	Male	Adult	Head	MaHed	SRR2076763	PRJNA283415
H. melpomene rosina	Hmel	Male	Adult	Head	MaHed	SRR2076757	PRJNA283415
H. melpomene rosina	Hmel	Male	Adult	Labial_palps_proboscis	MaLPP	ERS216973	PRJEB1499
H. melpomene rosina	Hmel	Male	Adult	Labial_palps_proboscis	MaLPP	ERS216956	PRJEB1499
H. melpomene rosina	Hmel	Male	Adult	Labial_palps_proboscis	MaLPP	ERR232450	PRJEB1499
H. melpomene rosina	Hmel	Male	Adult	Labial_palps_proboscis	MaLPP	ERR232448	PRJEB1499
H. melpomene rosina	Hmel	Male	Adult	Labial_palps_proboscis	MaLPP	ERR232447	PRJEB1499
H. melpomene rosina	Hmel	Male	Adult	Labial_palps_proboscis	MaLPP	ERR2206065	PRJEB23665
H. melpomene rosina	Hmel	Male	Adult	Legs	MaLeg	ERS216970	PRJEB1499
H. melpomene rosina	Hmel	Male	Adult	Legs	MaLeg	ERS216964	PRJEB1499
H. melpomene rosina	Hmel	Male	Adult	Legs	MaLeg	ERR232460	PRJEB1499
H. melpomene rosina	Hmel	Male	Adult	Legs	MaLeg	ERR232455	PRJEB1499
H. melpomene rosina	Hmel	Male	Adult	Legs	MaLeg	ERR232449	PRJEB1499
H. melpomene rosina	Hmel	Male	Adult	Legs	MaLeg	ERR232443	PRJEB1499
H. melpomene rosina	Hmel	Male	Adult	Legs	MaLeg	ERR2206062	PRJEB23665
H. melpomene rosina	Hmel	-	Adult	Gut	aGut	ERR3184367	PRJEB30552
H. melpomene rosina	Hmel	-	Adult	Gut	aGut	ERR3184368	PRJEB30552
H. melpomene rosina	Hmel	-	Adult	Gut	aGut	ERR3184369	PRJEB30552
H. melpomene rosina	Hmel	-	Adult	Gut	aGut	ERR3184370	PRJEB30552
H. melpomene rosina	Hmel	-	Adult	Gut	aGut	ERR3184371	PRJEB30552
H. melpomene rosina	Hmel	-	Adult	Gut	aGut	ERR3184372	PRJEB30552
H. melpomene rosina	Hmel	-	Adult	Gut	aGut	ERR3184373	PRJEB30552
H. melpomene rosina	Hmel	-	Adult	Gut	aGut	ERR3184374	PRJEB30552
H. melpomene rosina	Hmel	-	Adult	Gut	aGut	ERR3184375	PRJEB30552
H. melpomene rosina	Hmel	-	Adult	Gut	aGut	ERR3184376	PRJEB30552
H. melpomene rosina	Hmel	-	Adult	Gut	aGut	ERR3184377	PRJEB30552
H. melpomene rosina	Hmel	-	Adult	Gut	aGut	ERR3184378	PRJEB30552
H. melpomene rosina	Hmel	Female	Adult	Ovaries	FaOva	ERR3184379	PRJEB30552
H. melpomene rosina	Hmel	Female	Adult	Ovaries	FaOva	ERR3184380	PRJEB30552
H. melpomene rosina	Hmel	Female	Adult	Ovaries	FaOva	ERR3184381	PRJEB30552
H. melpomene rosina	Hmel	Female	Adult	Ovaries	FaOva	ERR3184382	PRJEB30552
H. melpomene rosina	Hmel	Female	Adult	Ovaries	FaOva	ERR3184383	PRJEB30552
H. melpomene rosina	Hmel	Female	Adult	Ovaries	FaOva	ERR3184384	PRJEB30552
H. melpomene rosina	Hmel	Female	Adult	Ovaries	FaOva	ERR3184385	PRJEB30552
H. melpomene rosina	Hmel	Female	Adult	Ovaries	FaOva	ERR3184386	PRJEB30552
H. melpomene rosina	Hmel	Female	Adult	Ovaries	FaOva	ERR3184387	PRJEB30552
H. melpomene rosina	Hmel	Female	Adult	Ovaries	FaOva	ERR3184388	PRJEB30552
H. melpomene rosina	Hmel	Female	Adult	Ovaries	FaOva	ERR3184389	PRJEB30552
H. melpomene rosina	Hmel	Female	Adult	Ovaries	FaOva	ERR3184390	PRJEB30552
H. melpomene rosina	Hmel	Female	Adult	Ovaries	FaOva	ERR3184391	PRJEB30552
H. sara	Hsar	Female	Adult	Antennae	MaAnt	ERR841733	PRJEB9022
H. sara	Hsar	Female	Adult	Legs	FaLeg	ERR841715	PRJEB9022
H. sara	Hsar	Female	Adult	Mouthparts	FaMot	ERR841722	PRJEB9022
H. sara	Hsar	Male	Adult	Antennae	MaAnt	ERR841728	PRJEB9022
H. sara	Hsar	Male	Adult	Legs	MaLeg	ERR841723	PRJEB9022
H. sara	Hsar	Male	Adult	Mouthparts	MaMot	ERR841731	PRJEB9022

## Sheet: Table S3
Clade	TimeTree.org (My)	Kozak et al 2015 (My)	Priors (100My)	CI (My)	Median (My)	Rate* (median 0.37)
Root	>76<102	-	'U(>0.76<1.02)'	78.8-102.6	92.5	-
Bany+Heliconiinae+Nynmphalinae	>70<96	-	'U(>0.70<0.96)'	72.0,95.3	83.1	0.36
Heliconiinae+Nynmphalinae	>60<81	-	'U(>0.60<0.81)'	59.5-78.5	67.8	0.38
Nymphalinae	>35<51	-	-	27.2-51.9	39.2	0.32
Heliconiinae	>45<65	-	-	35.9-55.5	45.3	0.49
Heliconiini	>21.5<30.4	26.2 (24.8-29.0)	-	20.7-32.7	26.5	0.52
OtherPoorSpeciesGenera	>15.8<23.2	22.0 (19.8-24.7)	-	14.7-27.6	21.5	0.28
Dione+Agraulis+Eueides+Heliconius	>22.2<33.3	﻿23.8 (21.7–26.6)	-	17.8-28.2	22.8	0.42
Eueides+Heliconius	>9.4<20.4	﻿18.4 (16.5–20.6)	'U(>0.094<0.204)'	12.5-19.6	15.9	0.43
Eueides	>7.61<9.97	10.2 (8.9-11.7)	-	7.3-12.1	9.6	0.61
Heliconius	>6.4<19.7	﻿11.8 (10.5–13.4)	-	8.8-13.8	11.1	0.61
Erato - Sara/Sapho	>5.54<6.09	6.2 (5.4-7.1)	-	4.8-7.4	6.0	0.3
Aoede - Dione - Wallacei - Silvaniformis - Melpomene	>6.39<11.65	10.5 (9.3-11.9)	-	7.7-12.2	9.8	0.41
* number of substitutions / site / 100 Mya

## Sheet: Table S4
					CI lower and upper bounds	Plausible timing of introgression (Mya)
Clade	Introgression Event	Triplet ratio (significant/total)	%	Average Gamma	of lineage duration (Mya)	Max	Min	Avg
Melpomene/Silvaniform	H. timoreta … H. etilla <--> H. melpomene … H. timerata	10/41	24	0.146249	4.82-3.02/3.16-1.88	3.16	3.02	3.09
Melpomene/Silvaniform	H. timoreta … H. etilla <--> H. natterei	0/30	0	0	-	-	-	-
Melpomene/Silvaniform	H. timoreta … H. etilla <--> H. besckei	0/20	0	0	-	-	-	-
Melpomene/Silvaniform	H. timoreta … H. melpomene <--> H. natterei … H. ismenius	0/100	0	0	-	-	-	-
Melpomene/Silvaniform	H. timoreta + H. eurippa <--> H. besckei … H. numata	3/36	8	0.0396519	4.35-2.73/4.03-2.38	4.03	2.73	3.38
Melpomene/Silvaniform	H. timoreta + H. eurippa <--> H. ethilla … H. hecale	16/47	34	0.0675085	4.35-2.73/3.81-2.33	3.81	2.73	3.27
Melpomene/Silvaniform	H. timoreta + H. eurippa <--> H. melpomene	2/4	50	0.0535262	4.35-2.73/3.16-0	3.16	2.73	2.945
Melpomene/Silvaniform	H. pachinus + H. cydno <--> H. besckei … H. melpomene	0/36	0	0	-	-	-	-
Melpomene/Silvaniform	H. pachinus <--> H. melpomene	0/3	0	0	-	-	-	-
Melpomene/Silvaniform	H. cydno <--> H. melpomene	1/3	33	0.0326633	1.93-0/3.16-0	1.93	0	0.965
Melpomene/Silvaniform	H. melpomene <--> H. natterei	1/12	8	0.022791	3.16-0/5.62-0	3.16	0	1.58
Melpomene/Silvaniform	H. melpomene <--> H. besckei … H. ismenius	4/27	14	0.0588404	3.16-0/4.53-2.81	3.16	2.81	2.985
Melpomene/Silvaniform	H. melpomene <--> H. ethilla … H. hecale	17/22	77	0.0915362	3.16-0/3.81-2.33	3.16	2.33	2.745
Melpomene/Silvaniform	H. hecale … H. etilla <--> H. natterei	9/40	22	0.116999	3.81-2.33/5.62-0	3.81	2.33	3.07
Melpomene/Silvaniform	H. hecale … H. etilla <--> H. besckei … H. ismenius	23/34	67	0.200179	3.81-2.33/4.53-2.81	3.81	2.81	3.31
Melpomene/Silvaniform	H. hecale … H. p. sergestus <--> H. melpomene … H. timareta	30/48	62	0.0723957	3.39-2.02/3.16-1.88	3.16	2.02	2.59
Melpomene/Silvaniform	H. hecale + H. attis <--> H. natterei	3/22	13	0.0246479	2.77-1.49/4.53-0	2.77	1.49	2.13
Melpomene/Silvaniform	H. hecale <--> H. p. sergestus + H. elevatus	2/2	100	0.0957484	2.77-0/2.45-1.21	2.77	1.21	1.99
Melpomene/Silvaniform	H. attis <--> H. p. sergestus + H. elevatus	0/2	0	0	-	-	-	-
Melpomene/Silvaniform	H. elevatus + H. p. sergestus <--> H. natterei	5/22	22	0	-	-	-	-
Melpomene/Silvaniform	H. ethilla <--> H. numata	0/5	0	0	-	-	-	-
Melpomene/Silvaniform	H. ethilla <--> H. melpomene … H. timareta	0/33	0	0	-	-	-	-
Melpomene/Silvaniform	H. ismenius + H. numata <--> H. melpomene … H. timareta	4/60	6	0.0847848	4.03-2.38/3.16-1.88	3.16	2.38	2.77
Melpomene/Silvaniform	H. ismenius + H. numata <--> H. p. sergestus	4/13	39	0.127697	4.03-2.38/2.45-0	2.45	2.38	2.415
Melpomene/Silvaniform	H. ismenius + H. numata <--> H. natterei	11/22	50	0	-	-	-	-
Melpomene/Silvaniform	H. ismenius <--> H. p. sergestus … H. attis	6/17	35	0	-	-	-	-
Melpomene/Silvaniform	H. numata <--> H. p. sergestus … H. attis	6/12	50	0.0664805	4.03-0/3.39-2.02	3.39	2.02	2.705
Melpomene/Silvaniform	H. besckei <--> H. melpomene … H. timareta	0/35	0	0	-	-	-	-
Melpomene/Silvaniform	H. besckei <--> H. p. sergestus	4/20	20	0	-	-	-	-
Melpomene/Silvaniform	H. besckei <--> H. natterei	4/22	18	0.0240084	4.53-0/5.62-0	4.53	0	2.265
Wallacei	H. wallacei <--> H. egeria	0/1	0	0	-	-	-	-
Wallacei	H. burneyi <--> H. egeria	1/1	100	0.0294427	3.41-0/5.48-0	3.41	0	1.705
Doris	H. doris <--> H. hierax	0/1	0	0	-	-	-	-
Doris	H. xanthocles <--> H. hierax	1/1	100	0.323224	2.21-0/3.79-0	2.21	0	1.105
Erato	Erato <--> H. hermethana … H. himera	192/216	88	0.115122	6.91-4.41/4.95-2.98	4.95	4.41	4.68
Erato	H. himera … H. hecaalesia <--> H. himera	2/2	100	0.321285	6.21-3.90/2.34-0	2.34	3.9	3.12
Erato	H. himera … H. hecaalesia <--> H. e. etylus	1/1	100	0.31555	6.21-3.90/3.42-0	3.42	3.9	3.66
Erato	H. himera … H. hecaalesia <--> H. hermethana	2/2	100	0.311298	6.21-3.90/4.95-0	4.95	3.9	4.425
Erato	H. himera ... H. hermathena <--> H. telesiphe … H. hortense	192/216	88	0	6.21-3.90/5.05-2.79	5.05	3.9	4.475
Erato	H. himera ... H. e. petiverana <--> H. hortense	50/80	62	0.027136	3.42-1.99/5.05-2.79	3.42	2.79	3.105
Erato	H. hermathena <--> H. hortense	10/20	50	0	-	-	-	-
Erato	H. hecalesia <--> H. telesiphe … H. hortense	13/13	100	0.291961	6.21-0/5.05-2.79	5.05	2.79	3.92
Erato	H. telesiphe … H. hortense <--> H. himera	32/54	59	0	-	-	-	-
Erato	H. telesiphe … H. hortense <--> H. e. etylus	32/54	59	0	-	-	-	-
Erato	H. telesiphe … H. hortense <--> H. hermethana	32/54	59	0	-	-	-	-
Erato	H. hortense + H. clysonimus <--> H. hermethana … H. himera	120/168	71	0.0430586	3.93-1.91/4.95-2.98	3.93	2.98	3.455
Erato	H. hortense + H. clysonimus <--> H. hecalesia	7/9	77	0.135725	3.93-1.91/6.21-0	3.93	1.91	2.92
Erato	H. telesiphe <--> H. hecalesia … H. himera	72/86	83	0	-	-	-	-
Sara/Sapho	H. sapho … H. antiochus <--> H. demeter	0/20	0	0.011236	-	-	-	-
Sara/Sapho	H. sapho … H. eleuchia <--> H. eratosignis	0/20	0	0.0094237	-	-	-	-
Sara/Sapho	H. sara + H. leucadia <--> H. eratosignis	0/14	0	0	-	-	-	-
Sara/Sapho	H. sara + H. leucadia <--> H. demeter	0/14	0	0	-	-	-	-
Heliconius	Doris + Wallacei + Silvaniform/Melpomene <--> Sara/Sapho + Erato	462/462	100	0.118619	11.29-7.07/7.43-4.79	7.43	7.07	7.25
Heliconius	Wallacei + Silvaniform/Melpomene <--> Sara/Sapho + Erato	411/1870	21	0.0369647	10.42-6.45/7.43-4.79	7.43	6.45	6.94
Heliconius	Silvaniform/Melpomene <--> Sara/Sapho + Erato	308/2464	12	0	-	-	-	-
Heliconius	Silvaniform/Melpomene <--> H. aoede	5/98	5	0.129993	5.62-3.51/12.21-0	5.62	3.51	4.565
Heliconius	Silvaniform/Melpomene <--> Doris	54/168	32	0.0917268	5.62-3.51/11.29-0	6.62	3.51	5.065
Heliconius	Silvaniform/Melpomene (no H. natterei) <--> H. ricini	13/390	3	0	-	-	-	-
Heliconius	H. timoreta … H. etilla <--> H. hecalesia	10/330	3	0	-	-	-	-
Heliconius	H. timareta + H. eurippa <--> H. congener … H. sapho	6/234	2	0.00508787	1.62-0.77/1.55-0.84	1.55	0.84	1.195
Heliconius	H. timareta + H. eurippa <--> H. ricini	2/82	2	0.00477137	1.62-0.77/5.45-0	1.62	0.77	1.195
Heliconius	H. timareta + H. eurippa <--> H. charitonia + H. peruvianus	4/160	2	0.005067	1.62-0.77/2.37-1.00	1.62	1	1.31
Heliconius	H. timareta + H. eurippa <--> H. erato lativitta	2/82	2	0.00548374	1.62-0.77/3.05-0	1.62	0.77	1.195
Heliconius	H. timareta + H. eurippa <--> H. hermetana + H. e. petiverana	4/160	2	0.00484703	1.62-0.77/2.85-1.53	1.62	1.53	1.575
Heliconius	H. timareta + H. eurippa <--> H. telesiphe … H. hortense	6/234	2	0.00545138	1.62-0.77/5.05-2.79*	-	-	-
Heliconius	H. pachinus + H. cydno <--> H. congener … H. sapho	6/234	2	0	-	-	-	-
Heliconius	H. pachinus + H. cydno <--> H. ricini	2/82	2	0	-	-	-	-
Heliconius	H. pachinus + H. cydno <--> H. charitonia + H. peruvianus	4/160	2	0	-	-	-	-
Heliconius	H. pachinus + H. cydno <--> H. erato lativitta	2/82	2	0	-	-	-	-
Heliconius	H. pachinus + H. cydno <--> H. hermetana + H. e. petiverana	4/160	2	0	-	-	-	-
Heliconius	H. pachinus + H. cydno <--> H. telesiphe … H. hortense	6/234	2	0	-	-	-	-
Heliconius	H. natterei <--> H. ricini	1/42	2	0.00545596	5.62-0/5.45-0	5.45	0	2.725
Heliconius	Wallacei <--> Doris + H. aoede	0/210	0	0	-	-	-	-
Heliconius	Wallacei <--> H. aoedes	0/54	0	0	-	-	-	-
Heliconius	Walalcei <--> Sara/Sapho + Erato	182/1254	14	0.0381261	5.48-2.9/7.43-4.79	5.48	4.79	5.135
Heliconius	Doris <--> H. aoede	2/68	2	0.128717	6.74-3.68/12.21-0	6.74	3.68	5.21
Heliconius	Doris <--> Sara/Sapho + Erato	88/1584	25	0	6.74-3.68/7.43-4.79	6.74	4.79	5.765
Heliconius	H. aoede <--> Sara/Sapho + Erato	0/462	0	0	-	-	-	-
Heliconius	Sara/Sapho <--> H. elevatus + H. attis	24/720	3	0	-	-	-	-
Heliconius	Sara/Sapho <--> H. ethilla	12/372	3	0	-	-	-	-
Heliconius	Sara/Sapho <--> H. numata	12/372	3	0	-	-	-	-
Heliconius	Sara/Sapho <--> H. natterei	12/372	3	0	-	-	-	-
Heliconius	Sara/Sapho <--> H. hecuba flava	12/372	3	0	-	-	-	-
Heliconius	Sara/Sapho <--> H. hermathena … H. himera	0/300	0	0	-	-	-	-
Heliconius	H. sapho … H. eratosignis <--> H. hecalesia	60/110	54	0	-	-	-	-
Heliconius	H. sapho … H. antiochus <--> H. himera	0/80	0	0.00808152	2.41-1.36/2.34-0	2.34	1.36	1.85
Heliconius	H. sapho … H. antiochus <--> H. telesiphe	0/50	0	0.00935588	2.41-1.36/5.05-0	2.41	1.36	1.885
Heliconius	H. sara + H. leucadia <--> H. himera	0/38	0	0	-	-	-	-
Heliconius	H. sara + H. leucadia <--> H. telesiphe	0/26	0	0	-	-	-	-
Heliconius	H. peruvianus + H. charitonia <--> H. hecalesia	17/38	44	0.0300398	2.37-1.00/6.21-0	2.37	1	1.685
Heliconius	Erato <--> H. elevatus + H. atthis	20/640	3	0.00946856	6.91-4.41/3.81-2.33	3.81	2.33	3.07
Heliconius	Erato <--> H. ethilla	10/330	3	0.00925926	6.91-4.41/3.81-0*	-	-	-
Heliconius	Erato <--> H. numata	10/330	3	0.0097629	6.91-4.41/4.03-0*	-	-	-
Heliconius	Erato <--> H. natterei	10/330	3	0.010179	6.91-4.41/5.62-0	5.62	4.41	5.015
Heliconius	Erato <--> H. hecuba flava	10/330	3	0.00989373	6.91-4.41/6.74-0	6.74	4.41	5.575
Heliconius	H. himera ... H. hermathena <--> Sara/Sapho	0/288	0	0	-	-	-	-
Heliconius	H. hecalesia <--> Sara/Sapho	72/108	66	0.194019	6.21-0/6.2-3.93	6.2	3.93	5.065
Heliconius	H. hortense … H. telesiphe <--> H. eratosignis + H. demeter	0/66	0	0	-	-	-	-
Heliconius	H. telesiphe <--> H. eratosignis + H. demeter	0/26	0	0	-	-	-	-
Heliconius	Po. telesiphe <--> H. ricini	0/56	0	0.028448	20.26-0/5.45-0	5.45	0	2.725
Heliconius	Po. telesiphe <--> H. e. etylus	0/56	0	0.0302152	20.26-0/3.05-0	3.05	0	1.525
Heliconius	Po. telesiphe <--> H. e. petiverana	0/55	0	0.0301138	20.26-0/2.85-0	2.85	0	1.425
Heliconius	Po. telesiphe <--> H. hortense	0/55	0	0.0298842	20.26-0/3.93-0	3.93	0	1.965
Heliconius	Po. telesiphe <--> H. telesiphe	0/55	0	0.0280374	20.26-0/5.05-0	5.05	0	2.525
Heliconius	Po. telesiphe <--> Agraulis + D. juno	0/212	0	0.0343732	20.26-0/17.18-0	17.18	0	8.59
Heliconius	Dy. iulia <--> H. demeter	0/56	0	0	-	-	-	-
Heliconius	Dy. iulia <--> H. e. etylus	0/56	0	0	-	-	-	-
Heliconius	Dy. iulia <--> H. e. petiverana	0/56	0	0	-	-	-	-
Heliconius	Dy. iulia <--> H. hortense	0/56	0	0	-	-	-	-
Heliconius	Dy. iulia <--> H. telesiphe	0/56	0	0	-	-	-	-
Heliconius	Dy. iulia <--> Agraulis + D. juno	0/212	0	0	-	-	-	-
Eueides-Heliconius	Aoede + Doris + Wallacei + Silvaniform/Melpomene <--> E. aliphera	0/594	0	0	-	-	-	-
Eueides-Heliconius	Sara/Sapho + Erato <--> E. aliphera	0/594	0	0.00933819	7.43-4.79/10.12-0	6.43	4.79	5.61
Eueides	E. lybia … E. aliphera <--> E. isabella … E. vibilia	0/6	0	0	-	-	-	-
Eueides	E. aliphera <--> E. isabella … E. vibilia	3/6	50	0.0598481	10.12-0/8.35-4.45	8.35	4.45	6.4
Eueides	E. aliphera <--> E. isabella	1/4	25	0.0612374	10.12-0/8.35-0	8.35	0	4.175
Agraulis	A. v. vanillae (Costa Rica) <--> A. vanillae incarnata (Florida)	1/1	100	0.124804	4.32-0/6.69-0	4.32	0	2.16
Agraulis	A. v. maculosa (Peru) <--> A. vanillae incarnata (Florida)	0/1	0	0	-	-	-	-
Asterisk (*) indicates introgressing lineages with no time overlap (according to 95% CIs). Ma, million years ago

## Sheet: Table S5
Branch	Type	OG	Ncopies	FBgnID
Heliconiinae	Contracted	OG_11988	-1	FBgn0036279
Heliconiinae	Expanded	OG_1037	1	FBgn0036749
Heliconiinae	Expanded	OG_1501	1	FBgn0030968
Heliconiinae	Expanded	OG_2116	3	FBgn0004584
Heliconiinae	Expanded	OG_2656	1	FBgn0264574
Heliconiinae	Expanded	OG_2788	3	FBgn0034802
Heliconiinae	Expanded	OG_2819	1	FBgn0052432
Heliconiinae	Expanded	OG_2914	2	FBgn0036659
Heliconiinae	Expanded	OG_2928	1	FBgn0004584
Heliconiinae	Expanded	OG_3058	3	FBgn0034802
Heliconiinae	Expanded	OG_3070	1	FBgn0085405
Heliconiinae	Expanded	OG_3239	1	FBgn0003890
Heliconiinae	Expanded	OG_3241	2	FBgn0260632
Heliconiinae	Expanded	OG_3245	2	FBgn0034802
Heliconiinae	Expanded	OG_3334	1	FBgn0034131
Heliconiinae	Expanded	OG_3551	4	FBgn0023171
Heliconiinae	Expanded	OG_3642	2	FBgn0037633
Heliconiinae	Expanded	OG_3670	1	FBgn0264574
Heliconiinae	Expanded	OG_3769	1	FBgn0264574
Heliconiinae	Expanded	OG_3825	1	FBgn0264574
Heliconiinae	Expanded	OG_4081	6	FBgn0038642
Heliconiinae	Expanded	OG_4099	2	FBgn0031619
Heliconiinae	Expanded	OG_4436	1	FBgn0260991
Heliconiinae	Expanded	OG_4451	1	FBgn0039476
Heliconiinae	Expanded	OG_4566	1	FBgn0013307
Heliconiinae	Expanded	OG_4575	2	FBgn0030362
Heliconiinae	Expanded	OG_4592	1	FBgn0004842
Heliconiinae	Expanded	OG_4604	1	FBgn0037633
Heliconiinae	Expanded	OG_5012	1	FBgn0030615
Heliconiinae	Expanded	OG_5457	1	FBgn0034145
Heliconiinae	Expanded	OG_5621	1	FBgn0037633
Heliconiinae	Expanded	OG_5796	1	FBgn0033423
Heliconiinae	Expanded	OG_5947	1	FBgn0042098
Heliconiinae	Expanded	OG_5961	1	FBgn0040319
Heliconiinae	Expanded	OG_5980	2	FBgn0042098
Heliconiinae	Expanded	OG_6123	1	FBgn0035781
Heliconiinae	Expanded	OG_6125	1	FBgn0000473
Heliconiinae	Expanded	OG_6345	1	FBgn0032132
Heliconiinae	Expanded	OG_6438	1	FBgn0027601
Heliconiinae	Expanded	OG_6451	2	FBgn0000473
Heliconiinae	Expanded	OG_6683	1	FBgn0053087
Heliconiinae	Expanded	OG_8069	1	FBgn0011286
Heliconiinae	Expanded	OG_8422	1	FBgn0005658
Heliconiinae	Expanded	OG_9250	1	FBgn0265998
Heliconiinae	Expanded	OG_9345	1	FBgn0015245
Heliconiinae	Expanded	OG_10612	1	FBgn0053196
Heliconiinae	Expanded	OG_10694	1	FBgn0085423
Heliconiinae	Expanded	OG_11473	2	FBgn0035199
Heliconiinae	Expanded	OG_12108	1	FBgn0036436
Heliconiinae	Expanded	OG_13766	1	FBgn0030992
Heliconiinae	Expanded	OG_14770	1	FBgn0022097
Heliconiinae	Expanded	OG_14853	2	FBgn0020309
Heliconiinae	Expanded	OG_18028	1	FBgn0033367
Heliconiinae	Expanded	OG_30380	2	FBgn0053899
Heliconiini	Contracted	OG_1220	-1	FBgn0283427
Heliconiini	Contracted	OG_3241	-1	FBgn0260632
Heliconiini	Contracted	OG_6076	-1	FBgn0042098
Heliconiini	Contracted	OG_6145	-1	FBgn0086687
Heliconiini	Contracted	OG_6266	-1	FBgn0033028
Heliconiini	Contracted	OG_6517	-1	FBgn0261612
Heliconiini	Contracted	OG_6834	-1	FBgn0261800
Heliconiini	Contracted	OG_8069	-2	FBgn0011286
Heliconiini	Contracted	OG_29885	-1	FBgn0033203
Heliconiini	Expanded	OG_141	1	FBgn0036405
Heliconiini	Expanded	OG_842	1	FBgn0005670
Heliconiini	Expanded	OG_1689	1	FBgn0051414
Heliconiini	Expanded	OG_2116	1	FBgn0004584
Heliconiini	Expanded	OG_2656	1	FBgn0264574
Heliconiini	Expanded	OG_2914	3	FBgn0036659
Heliconiini	Expanded	OG_2981	1	FBgn0026314
Heliconiini	Expanded	OG_2990	1	FBgn0053196
Heliconiini	Expanded	OG_3097	1	FBgn0032264
Heliconiini	Expanded	OG_3206	1	FBgn0034802
Heliconiini	Expanded	OG_3208	1	FBgn0263391
Heliconiini	Expanded	OG_3245	1	FBgn0034802
Heliconiini	Expanded	OG_3248	1	FBgn0033636
Heliconiini	Expanded	OG_3338	1	FBgn0004584
Heliconiini	Expanded	OG_3551	1	FBgn0023171
Heliconiini	Expanded	OG_3642	3	FBgn0037633
Heliconiini	Expanded	OG_3670	1	FBgn0264574
Heliconiini	Expanded	OG_3825	2	FBgn0264574
Heliconiini	Expanded	OG_3933	1	FBgn0024889
Heliconiini	Expanded	OG_4081	1	FBgn0038642
Heliconiini	Expanded	OG_4099	1	FBgn0031619
Heliconiini	Expanded	OG_4436	4	FBgn0260991
Heliconiini	Expanded	OG_4462	1	FBgn0264574
Heliconiini	Expanded	OG_4604	5	FBgn0037633
Heliconiini	Expanded	OG_4944	1	FBgn0000140
Heliconiini	Expanded	OG_5609	1	FBgn0037633
Heliconiini	Expanded	OG_5621	1	FBgn0037633
Heliconiini	Expanded	OG_5659	1	FBgn0034479
Heliconiini	Expanded	OG_5796	1	FBgn0033423
Heliconiini	Expanded	OG_5815	1	FBgn0086348
Heliconiini	Expanded	OG_5872	1	FBgn0042098
Heliconiini	Expanded	OG_5947	1	FBgn0042098
Heliconiini	Expanded	OG_5980	1	FBgn0042098
Heliconiini	Expanded	OG_6086	1	FBgn0034479
Heliconiini	Expanded	OG_6087	1	FBgn0037144
Heliconiini	Expanded	OG_6125	1	FBgn0000473
Heliconiini	Expanded	OG_6438	1	FBgn0027601
Heliconiini	Expanded	OG_6451	1	FBgn0000473
Heliconiini	Expanded	OG_6462	3	FBgn0013770
Heliconiini	Expanded	OG_6463	1	FBgn0053126
Heliconiini	Expanded	OG_6928	1	FBgn0023171
Heliconiini	Expanded	OG_9553	1	FBgn0040349
Heliconiini	Expanded	OG_11157	1	FBgn0033367
Heliconiini	Expanded	OG_11610	1	FBgn0037323
Heliconiini	Expanded	OG_11879	2	FBgn0010226
Heliconiini	Expanded	OG_11881	2	FBgn0010226
Heliconiini	Expanded	OG_12991	1	FBgn0005666
Heliconiini	Expanded	OG_13145	2	FBgn0031760
Heliconiini	Expanded	OG_14770	1	FBgn0022097
Heliconiini	Expanded	OG_30567	1	FBgn0052238
Heliconiini	Expanded	OG_31046	1	FBgn0036996
PtelDiulDphaPdid	Contracted	OG_321	-1	FBgn0051954
PtelDiulDphaPdid	Contracted	OG_755	-1	FBgn0040349
PtelDiulDphaPdid	Contracted	OG_1469	-1	FBgn0000473
PtelDiulDphaPdid	Contracted	OG_2167	-1	FBgn0012037
PtelDiulDphaPdid	Contracted	OG_2788	-2	FBgn0034802
PtelDiulDphaPdid	Contracted	OG_2928	-1	FBgn0004584
PtelDiulDphaPdid	Contracted	OG_2979	-1	FBgn0086604
PtelDiulDphaPdid	Contracted	OG_3026	-1	FBgn0031690
PtelDiulDphaPdid	Contracted	OG_3052	-1	FBgn0037383
PtelDiulDphaPdid	Contracted	OG_3058	-1	FBgn0034802
PtelDiulDphaPdid	Contracted	OG_3063	-1	FBgn0085446
PtelDiulDphaPdid	Contracted	OG_3168	-1	FBgn0036659
PtelDiulDphaPdid	Contracted	OG_3196	-1	FBgn0040257
PtelDiulDphaPdid	Contracted	OG_3245	-1	FBgn0034802
PtelDiulDphaPdid	Contracted	OG_3297	-1	FBgn0005666
PtelDiulDphaPdid	Contracted	OG_3409	-1	FBgn0030576
PtelDiulDphaPdid	Contracted	OG_3492	-1	FBgn0004652
PtelDiulDphaPdid	Contracted	OG_3536	-1	FBgn0016013
PtelDiulDphaPdid	Contracted	OG_3783	-1	FBgn0029778
PtelDiulDphaPdid	Contracted	OG_3963	-1	FBgn0031061
PtelDiulDphaPdid	Contracted	OG_4081	-1	FBgn0038642
PtelDiulDphaPdid	Contracted	OG_4086	-1	FBgn0013733
PtelDiulDphaPdid	Contracted	OG_4129	-1	FBgn0040230
PtelDiulDphaPdid	Contracted	OG_4662	-1	FBgn0035099
PtelDiulDphaPdid	Contracted	OG_4801	-1	-
PtelDiulDphaPdid	Contracted	OG_6076	-1	FBgn0042098
PtelDiulDphaPdid	Contracted	OG_6175	-1	FBgn0030615
PtelDiulDphaPdid	Contracted	OG_6524	-1	FBgn0003134
PtelDiulDphaPdid	Contracted	OG_6834	-1	FBgn0261800
PtelDiulDphaPdid	Contracted	OG_7011	-1	FBgn0031722
PtelDiulDphaPdid	Contracted	OG_7053	-1	-
PtelDiulDphaPdid	Contracted	OG_8355	-1	FBgn0024912
PtelDiulDphaPdid	Contracted	OG_9189	-1	FBgn0010434
PtelDiulDphaPdid	Contracted	OG_10677	-1	FBgn0015600
PtelDiulDphaPdid	Contracted	OG_10887	-1	FBgn0004914
PtelDiulDphaPdid	Contracted	OG_10995	-1	FBgn0039084
PtelDiulDphaPdid	Contracted	OG_10996	-1	FBgn0005536
PtelDiulDphaPdid	Contracted	OG_11753	-1	FBgn0005666
PtelDiulDphaPdid	Contracted	OG_11805	-1	FBgn0052319
PtelDiulDphaPdid	Contracted	OG_12174	-1	-
PtelDiulDphaPdid	Contracted	OG_12408	-1	FBgn0016684
PtelDiulDphaPdid	Contracted	OG_12436	-1	FBgn0028570
PtelDiulDphaPdid	Contracted	OG_12451	-1	FBgn0039131
PtelDiulDphaPdid	Contracted	OG_14597	-1	FBgn0010097
PtelDiulDphaPdid	Contracted	OG_15353	-1	FBgn0015521
PtelDiulDphaPdid	Contracted	OG_16563	-1	FBgn0000479
PtelDiulDphaPdid	Contracted	OG_16661	-1	FBgn0039937
PtelDiulDphaPdid	Contracted	OG_18423	-1	FBgn0031039
PtelDiulDphaPdid	Contracted	OG_18520	-1	FBgn0259162
PtelDiulDphaPdid	Contracted	OG_18669	-1	-
PtelDiulDphaPdid	Contracted	OG_18704	-1	FBgn0016754
PtelDiulDphaPdid	Contracted	OG_19271	-1	FBgn0085405
PtelDiulDphaPdid	Contracted	OG_20270	-1	FBgn0051221
PtelDiulDphaPdid	Contracted	OG_24642	-1	-
PtelDiulDphaPdid	Contracted	OG_25194	-1	FBgn0034802
PtelDiulDphaPdid	Contracted	OG_28049	-1	FBgn0033308
PtelDiulDphaPdid	Contracted	OG_28551	-1	FBgn0265356
PtelDiulDphaPdid	Contracted	OG_30129	-1	FBgn0037633
PtelDiulDphaPdid	Contracted	OG_31103	-1	FBgn0027553
PtelDiulDphaPdid	Contracted	OG_31564	-1	FBgn0027572
PtelDiulDphaPdid	Contracted	OG_33200	-1	FBgn0051546
PtelDiulDphaPdid	Contracted	OG_33484	-1	FBgn0041713
PtelDiulDphaPdid	Contracted	OG_33717	-1	FBgn0002774
PtelDiulDphaPdid	Expanded	OG_1689	1	FBgn0051414
PtelDiulDphaPdid	Expanded	OG_2116	1	FBgn0004584
PtelDiulDphaPdid	Expanded	OG_2914	1	FBgn0036659
PtelDiulDphaPdid	Expanded	OG_3156	1	FBgn0019982
PtelDiulDphaPdid	Expanded	OG_3248	1	FBgn0033636
PtelDiulDphaPdid	Expanded	OG_3825	1	FBgn0264574
PtelDiulDphaPdid	Expanded	OG_4436	1	FBgn0260991
PtelDiulDphaPdid	Expanded	OG_4604	1	FBgn0037633
PtelDiulDphaPdid	Expanded	OG_4675	1	FBgn0031107
PtelDiulDphaPdid	Expanded	OG_5195	1	FBgn0020309
PtelDiulDphaPdid	Expanded	OG_6537	1	FBgn0032264
PtelDiulDphaPdid	Expanded	OG_6683	1	FBgn0053087
PtelDiulDphaPdid	Expanded	OG_6928	1	FBgn0023171
PtelDiulDphaPdid	Expanded	OG_10353	1	FBgn0051522
DioneAgraulisEueidesHeliconius	Contracted	OG_4575	-1	FBgn0030362
DioneAgraulisEueidesHeliconius	Expanded	OG_2788	1	FBgn0034802
DioneAgraulisEueidesHeliconius	Expanded	OG_3338	1	FBgn0004584
DioneAgraulisEueidesHeliconius	Expanded	OG_5921	1	FBgn0023171
DioneAgraulisEueidesHeliconius	Expanded	OG_6085	1	FBgn0015621
EueidesHeliconius	Contracted	OG_3448	-1	FBgn0085437
EueidesHeliconius	Contracted	OG_3769	-1	FBgn0264574
EueidesHeliconius	Contracted	OG_4436	-2	FBgn0260991
EueidesHeliconius	Contracted	OG_4604	-1	FBgn0037633
EueidesHeliconius	Contracted	OG_5012	-1	FBgn0030615
EueidesHeliconius	Contracted	OG_5195	-1	FBgn0020309
EueidesHeliconius	Contracted	OG_5230	-1	FBgn0053299
EueidesHeliconius	Contracted	OG_5294	-1	FBgn0000473
EueidesHeliconius	Contracted	OG_5609	-1	FBgn0037633
EueidesHeliconius	Contracted	OG_5621	-1	FBgn0037633
EueidesHeliconius	Contracted	OG_6315	-1	FBgn0040234
EueidesHeliconius	Contracted	OG_6598	-1	FBgn0028500
EueidesHeliconius	Contracted	OG_11208	-1	FBgn0000473
EueidesHeliconius	Contracted	OG_11879	-1	FBgn0010226
EueidesHeliconius	Contracted	OG_14853	-1	FBgn0020309
EueidesHeliconius	Contracted	OG_30380	-1	FBgn0053899
EueidesHeliconius	Expanded	OG_3097	1	FBgn0032264
EueidesHeliconius	Expanded	OG_4116	1	FBgn0032160
EueidesHeliconius	Expanded	OG_4546	1	FBgn0265002
EueidesHeliconius	Expanded	OG_5741	2	FBgn0030615
EueidesHeliconius	Expanded	OG_5749	1	FBgn0039326
EueidesHeliconius	Expanded	OG_6110	1	FBgn0034943
EueidesHeliconius	Expanded	OG_6385	1	FBgn0029896
EueidesHeliconius	Expanded	OG_6689	3	FBgn0038087
EueidesHeliconius	Expanded	OG_9229	1	FBgn0032988
EueidesHeliconius	Expanded	OG_11610	1	FBgn0037323
EueidesHeliconius	Expanded	OG_12763	1	FBgn0033043
EueidesHeliconius	Expanded	OG_12991	2	FBgn0005666
EueidesHeliconius	Expanded	OG_18108	1	FBgn0029966
EueidesHeliconius	Expanded	OG_29885	1	FBgn0033203
DioneAgraulis	Contracted	OG_1689	-1	FBgn0051414
DioneAgraulis	Contracted	OG_2554	-1	FBgn0051029
DioneAgraulis	Contracted	OG_3026	-1	FBgn0031690
DioneAgraulis	Contracted	OG_3027	-1	FBgn0037715
DioneAgraulis	Contracted	OG_3168	-1	FBgn0036659
DioneAgraulis	Contracted	OG_3297	-1	FBgn0005666
DioneAgraulis	Contracted	OG_3352	-2	FBgn0042098
DioneAgraulis	Contracted	OG_3783	-1	FBgn0029778
DioneAgraulis	Contracted	OG_4129	-1	FBgn0040230
DioneAgraulis	Contracted	OG_4130	-1	FBgn0030615
DioneAgraulis	Contracted	OG_4229	-1	FBgn0034580
DioneAgraulis	Contracted	OG_4275	-1	FBgn0045495
DioneAgraulis	Contracted	OG_4801	-1	-
DioneAgraulis	Contracted	OG_5414	-1	FBgn0035420
DioneAgraulis	Contracted	OG_5457	-1	FBgn0034145
DioneAgraulis	Contracted	OG_5937	-1	FBgn0034389
DioneAgraulis	Contracted	OG_5991	-1	FBgn0030590
DioneAgraulis	Contracted	OG_6373	-1	FBgn0040349
DioneAgraulis	Contracted	OG_6397	-1	FBgn0265434
DioneAgraulis	Contracted	OG_6596	-1	FBgn0034802
DioneAgraulis	Contracted	OG_6805	-1	FBgn0035953
DioneAgraulis	Contracted	OG_7011	-1	FBgn0031722
DioneAgraulis	Contracted	OG_7053	-1	-
DioneAgraulis	Contracted	OG_9070	-1	FBgn0000308
DioneAgraulis	Contracted	OG_9119	-1	FBgn0001075
DioneAgraulis	Contracted	OG_9189	-1	FBgn0010434
DioneAgraulis	Contracted	OG_10612	-1	FBgn0053196
DioneAgraulis	Contracted	OG_10677	-1	FBgn0015600
DioneAgraulis	Contracted	OG_10887	-1	FBgn0004914
DioneAgraulis	Contracted	OG_10991	-1	FBgn0260943
DioneAgraulis	Contracted	OG_10995	-1	FBgn0039084
DioneAgraulis	Contracted	OG_10996	-1	FBgn0005536
DioneAgraulis	Contracted	OG_11391	-2	FBgn0030590
DioneAgraulis	Contracted	OG_11610	-1	FBgn0037323
DioneAgraulis	Contracted	OG_11753	-1	FBgn0005666
DioneAgraulis	Contracted	OG_11805	-1	FBgn0052319
DioneAgraulis	Contracted	OG_12174	-1	-
DioneAgraulis	Contracted	OG_12451	-1	FBgn0039131
DioneAgraulis	Contracted	OG_12458	-1	FBgn0003721
DioneAgraulis	Contracted	OG_12762	-1	FBgn0033043
DioneAgraulis	Contracted	OG_13100	-1	FBgn0003890
DioneAgraulis	Contracted	OG_13535	-1	FBgn0034902
DioneAgraulis	Contracted	OG_14533	-1	FBgn0003687
DioneAgraulis	Contracted	OG_14597	-1	FBgn0010097
DioneAgraulis	Contracted	OG_15353	-1	FBgn0015521
DioneAgraulis	Contracted	OG_16661	-1	FBgn0039937
DioneAgraulis	Contracted	OG_16892	-1	FBgn0259176
DioneAgraulis	Contracted	OG_18423	-1	FBgn0031039
DioneAgraulis	Contracted	OG_18520	-1	FBgn0259162
DioneAgraulis	Contracted	OG_18669	-1	-
DioneAgraulis	Contracted	OG_18704	-1	FBgn0016754
DioneAgraulis	Contracted	OG_19195	-1	FBgn0259213
DioneAgraulis	Contracted	OG_19271	-1	FBgn0085405
DioneAgraulis	Contracted	OG_19631	-1	FBgn0085390
DioneAgraulis	Contracted	OG_20270	-1	FBgn0051221
DioneAgraulis	Contracted	OG_21086	-1	FBgn0034729
DioneAgraulis	Contracted	OG_21568	-1	FBgn0040384
DioneAgraulis	Contracted	OG_24642	-1	-
DioneAgraulis	Contracted	OG_25194	-1	FBgn0034802
DioneAgraulis	Contracted	OG_28049	-1	FBgn0033308
DioneAgraulis	Contracted	OG_28551	-1	FBgn0265356
DioneAgraulis	Contracted	OG_31103	-1	FBgn0027553
DioneAgraulis	Contracted	OG_31564	-1	FBgn0027572
DioneAgraulis	Contracted	OG_33200	-1	FBgn0051546
DioneAgraulis	Contracted	OG_33484	-1	FBgn0041713
DioneAgraulis	Expanded	OG_34	1	FBgn0085412
DioneAgraulis	Expanded	OG_781	1	FBgn0086895
DioneAgraulis	Expanded	OG_2788	3	FBgn0034802
DioneAgraulis	Expanded	OG_2981	2	FBgn0026314
DioneAgraulis	Expanded	OG_3001	1	FBgn0042098
DioneAgraulis	Expanded	OG_3058	1	FBgn0034802
DioneAgraulis	Expanded	OG_3084	1	FBgn0000473
DioneAgraulis	Expanded	OG_3245	5	FBgn0034802
DioneAgraulis	Expanded	OG_3338	10	FBgn0004584
DioneAgraulis	Expanded	OG_3492	1	FBgn0004652
DioneAgraulis	Expanded	OG_3551	1	FBgn0023171
DioneAgraulis	Expanded	OG_3642	5	FBgn0037633
DioneAgraulis	Expanded	OG_4081	6	FBgn0038642
DioneAgraulis	Expanded	OG_4099	1	FBgn0031619
DioneAgraulis	Expanded	OG_4318	1	FBgn0033159
DioneAgraulis	Expanded	OG_4436	2	FBgn0260991
DioneAgraulis	Expanded	OG_4438	1	FBgn0030615
DioneAgraulis	Expanded	OG_4451	1	FBgn0039476
DioneAgraulis	Expanded	OG_4566	1	FBgn0013307
DioneAgraulis	Expanded	OG_4581	1	FBgn0040349
DioneAgraulis	Expanded	OG_4604	1	FBgn0037633
DioneAgraulis	Expanded	OG_5659	1	FBgn0034479
DioneAgraulis	Expanded	OG_6061	2	FBgn0037633
DioneAgraulis	Expanded	OG_6119	1	FBgn0264502
DioneAgraulis	Expanded	OG_6123	1	FBgn0035781
DioneAgraulis	Expanded	OG_6451	1	FBgn0000473
DioneAgraulis	Expanded	OG_6554	2	FBgn0035781
DioneAgraulis	Expanded	OG_6758	1	FBgn0030545
DioneAgraulis	Expanded	OG_8664	1	FBgn0040376
DioneAgraulis	Expanded	OG_10054	1	FBgn0031374
DioneAgraulis	Expanded	OG_10300	1	FBgn0261554
DioneAgraulis	Expanded	OG_10661	1	FBgn0051678
DioneAgraulis	Expanded	OG_11879	1	FBgn0010226
DioneAgraulis	Expanded	OG_12093	1	FBgn0003870
DioneAgraulis	Expanded	OG_14853	1	FBgn0020309
DioneAgraulis	Expanded	OG_17810	1	FBgn0264598
DioneAgraulis	Expanded	OG_26393	2	FBgn0053852
DioneAgraulis	Expanded	OG_29864	1	FBgn0000261
DioneAgraulis	Expanded	OG_30129	1	FBgn0037633
DioneAgraulis	Expanded	OG_30328	1	FBgn0053856
Eueides	Contracted	OG_1689	-1	FBgn0051414
Eueides	Contracted	OG_2708	-1	FBgn0036622
Eueides	Contracted	OG_2819	-1	FBgn0052432
Eueides	Contracted	OG_3026	-1	FBgn0031690
Eueides	Contracted	OG_3168	-1	FBgn0036659
Eueides	Contracted	OG_3238	-1	FBgn0040475
Eueides	Contracted	OG_3409	-1	FBgn0030576
Eueides	Contracted	OG_3772	-1	FBgn0001235
Eueides	Contracted	OG_3774	-1	FBgn0000594
Eueides	Contracted	OG_3783	-1	FBgn0029778
Eueides	Contracted	OG_3933	-1	FBgn0024889
Eueides	Contracted	OG_4670	-1	FBgn0005666
Eueides	Contracted	OG_4801	-1	-
Eueides	Contracted	OG_5374	-1	FBgn0261854
Eueides	Contracted	OG_6223	-1	FBgn0259246
Eueides	Contracted	OG_6395	-1	FBgn0033504
Eueides	Contracted	OG_6654	-1	FBgn0085447
Eueides	Contracted	OG_6656	-1	FBgn0265434
Eueides	Contracted	OG_6805	-1	FBgn0035953
Eueides	Contracted	OG_6835	-1	FBgn0037633
Eueides	Contracted	OG_7011	-1	FBgn0031722
Eueides	Contracted	OG_8744	-1	FBgn0262937
Eueides	Contracted	OG_8890	-1	FBgn0010389
Eueides	Contracted	OG_9189	-1	FBgn0010434
Eueides	Contracted	OG_10409	-1	FBgn0264542
Eueides	Contracted	OG_10677	-1	FBgn0015600
Eueides	Contracted	OG_10887	-1	FBgn0004914
Eueides	Contracted	OG_10991	-1	FBgn0260943
Eueides	Contracted	OG_11753	-1	FBgn0005666
Eueides	Contracted	OG_11805	-1	FBgn0052319
Eueides	Contracted	OG_12174	-1	-
Eueides	Contracted	OG_12227	-1	-
Eueides	Contracted	OG_12408	-1	FBgn0016684
Eueides	Contracted	OG_12451	-1	FBgn0039131
Eueides	Contracted	OG_12458	-1	FBgn0003721
Eueides	Contracted	OG_13100	-1	FBgn0003890
Eueides	Contracted	OG_13187	-1	FBgn0003134
Eueides	Contracted	OG_13535	-1	FBgn0034902
Eueides	Contracted	OG_13766	-1	FBgn0030992
Eueides	Contracted	OG_14597	-1	FBgn0010097
Eueides	Contracted	OG_16563	-1	FBgn0000479
Eueides	Contracted	OG_16661	-1	FBgn0039937
Eueides	Contracted	OG_16892	-1	FBgn0259176
Eueides	Contracted	OG_18423	-1	FBgn0031039
Eueides	Contracted	OG_18520	-1	FBgn0259162
Eueides	Contracted	OG_18669	-1	-
Eueides	Contracted	OG_18704	-1	FBgn0016754
Eueides	Contracted	OG_19195	-1	FBgn0259213
Eueides	Contracted	OG_19271	-1	FBgn0085405
Eueides	Contracted	OG_19631	-1	FBgn0085390
Eueides	Contracted	OG_20270	-1	FBgn0051221
Eueides	Contracted	OG_21069	-1	FBgn0040623
Eueides	Contracted	OG_21086	-1	FBgn0034729
Eueides	Contracted	OG_21568	-1	FBgn0040384
Eueides	Contracted	OG_24642	-1	-
Eueides	Contracted	OG_24672	-1	FBgn0035046
Eueides	Contracted	OG_28204	-1	FBgn0052227
Eueides	Contracted	OG_28551	-1	FBgn0265356
Eueides	Contracted	OG_30129	-1	FBgn0037633
Eueides	Contracted	OG_30221	-1	FBgn0043456
Eueides	Contracted	OG_31103	-1	FBgn0027553
Eueides	Contracted	OG_31161	-1	-
Eueides	Contracted	OG_31564	-1	FBgn0027572
Eueides	Contracted	OG_33035	-1	FBgn0011661
Eueides	Contracted	OG_33200	-1	FBgn0051546
Eueides	Contracted	OG_33484	-1	FBgn0041713
Eueides	Contracted	OG_33717	-1	FBgn0002774
Eueides	Expanded	OG_321	2	FBgn0051954
Eueides	Expanded	OG_1430	1	FBgn0264574
Eueides	Expanded	OG_1469	1	FBgn0000473
Eueides	Expanded	OG_2116	2	FBgn0004584
Eueides	Expanded	OG_2914	3	FBgn0036659
Eueides	Expanded	OG_3001	1	FBgn0042098
Eueides	Expanded	OG_3058	5	FBgn0034802
Eueides	Expanded	OG_3228	1	FBgn0267385
Eueides	Expanded	OG_3245	1	FBgn0034802
Eueides	Expanded	OG_3365	1	FBgn0262866
Eueides	Expanded	OG_3434	3	FBgn0043362
Eueides	Expanded	OG_3551	6	FBgn0023171
Eueides	Expanded	OG_3642	1	FBgn0037633
Eueides	Expanded	OG_3670	1	FBgn0264574
Eueides	Expanded	OG_3744	1	FBgn0034197
Eueides	Expanded	OG_4081	5	FBgn0038642
Eueides	Expanded	OG_4099	2	FBgn0031619
Eueides	Expanded	OG_4181	1	FBgn0036659
Eueides	Expanded	OG_4196	2	FBgn0004584
Eueides	Expanded	OG_4436	1	FBgn0260991
Eueides	Expanded	OG_4441	1	FBgn0031619
Eueides	Expanded	OG_4495	1	FBgn0011576
Eueides	Expanded	OG_5947	1	FBgn0042098
Eueides	Expanded	OG_5980	1	FBgn0042098
Eueides	Expanded	OG_5991	1	FBgn0030590
Eueides	Expanded	OG_6076	1	FBgn0042098
Eueides	Expanded	OG_6084	1	FBgn0026086
Eueides	Expanded	OG_6300	1	FBgn0003308
Eueides	Expanded	OG_6462	2	FBgn0013770
Eueides	Expanded	OG_6463	2	FBgn0053126
Eueides	Expanded	OG_6520	1	FBgn0036715
Eueides	Expanded	OG_6554	1	FBgn0035781
Eueides	Expanded	OG_6596	1	FBgn0034802
Eueides	Expanded	OG_6689	6	FBgn0038087
Eueides	Expanded	OG_8664	1	FBgn0040376
Eueides	Expanded	OG_9119	2	FBgn0001075
Eueides	Expanded	OG_9382	1	FBgn0015269
Eueides	Expanded	OG_11391	1	FBgn0030590
Eueides	Expanded	OG_12533	1	FBgn0034166
Eueides	Expanded	OG_12991	1	FBgn0005666
Eueides	Expanded	OG_18470	1	FBgn0026314
Eueides	Expanded	OG_31046	2	FBgn0036996
Heliconius	Contracted	OG_141	-1	FBgn0036405
Heliconius	Contracted	OG_321	-1	FBgn0051954
Heliconius	Contracted	OG_329	-1	FBgn0053196
Heliconius	Contracted	OG_781	-1	FBgn0086895
Heliconius	Contracted	OG_1037	-1	FBgn0036749
Heliconius	Contracted	OG_2116	-3	FBgn0004584
Heliconius	Contracted	OG_2788	-1	FBgn0034802
Heliconius	Contracted	OG_2914	-2	FBgn0036659
Heliconius	Contracted	OG_3037	-1	FBgn0003719
Heliconius	Contracted	OG_3058	-2	FBgn0034802
Heliconius	Contracted	OG_3084	-1	FBgn0000473
Heliconius	Contracted	OG_3241	-1	FBgn0260632
Heliconius	Contracted	OG_3245	-2	FBgn0034802
Heliconius	Contracted	OG_3248	-1	FBgn0033636
Heliconius	Contracted	OG_3338	-1	FBgn0004584
Heliconius	Contracted	OG_3551	-1	FBgn0023171
Heliconius	Contracted	OG_3642	-3	FBgn0037633
Heliconius	Contracted	OG_3825	-1	FBgn0264574
Heliconius	Contracted	OG_4056	-1	FBgn0063493
Heliconius	Contracted	OG_4081	-9	FBgn0038642
Heliconius	Contracted	OG_4099	-1	FBgn0031619
Heliconius	Contracted	OG_4331	-1	FBgn0034184
Heliconius	Contracted	OG_4436	-2	FBgn0260991
Heliconius	Contracted	OG_4604	-2	FBgn0037633
Heliconius	Contracted	OG_4615	-1	FBgn0031619
Heliconius	Contracted	OG_5621	-2	FBgn0037633
Heliconius	Contracted	OG_5722	-1	FBgn0042098
Heliconius	Contracted	OG_5796	-1	FBgn0033423
Heliconius	Contracted	OG_5811	-1	FBgn0035632
Heliconius	Contracted	OG_5980	-1	FBgn0042098
Heliconius	Contracted	OG_5996	-1	FBgn0037537
Heliconius	Contracted	OG_6042	-1	FBgn0039626
Heliconius	Contracted	OG_6076	-1	FBgn0042098
Heliconius	Contracted	OG_6345	-1	FBgn0032132
Heliconius	Contracted	OG_6451	-1	FBgn0000473
Heliconius	Contracted	OG_6462	-2	FBgn0013770
Heliconius	Contracted	OG_6874	-1	FBgn0004584
Heliconius	Contracted	OG_6928	-1	FBgn0023171
Heliconius	Contracted	OG_8129	-1	FBgn0259791
Heliconius	Contracted	OG_9345	-2	FBgn0015245
Heliconius	Contracted	OG_11881	-1	FBgn0010226
Heliconius	Contracted	OG_13145	-1	FBgn0031760
Heliconius	Contracted	OG_14770	-1	FBgn0022097
Heliconius	Contracted	OG_17810	-1	FBgn0264598
Heliconius	Contracted	OG_26393	-1	FBgn0053852
Heliconius	Contracted	OG_30328	-1	FBgn0053856
Heliconius	Contracted	OG_30380	-1	FBgn0053899
Heliconius	Contracted	OG_31046	-1	FBgn0036996
Heliconius	Expanded	OG_2464	1	FBgn0051344
Heliconius	Expanded	OG_3774	2	FBgn0000594
Heliconius	Expanded	OG_5097	1	FBgn0023000
Heliconius	Expanded	OG_6335	1	FBgn0037819
Heliconius	Expanded	OG_6528	3	FBgn0028841
Heliconius	Expanded	OG_11033	1	FBgn0031229
Heliconius	Expanded	OG_23897	1	FBgn0020641
Heliconius	Expanded	OG_28049	1	FBgn0033308
AoedeDioneWallaceiSilvaniformisMelpomene	Contracted	OG_2788	-1	FBgn0034802
AoedeDioneWallaceiSilvaniformisMelpomene	Contracted	OG_2914	-1	FBgn0036659
AoedeDioneWallaceiSilvaniformisMelpomene	Contracted	OG_2928	-1	FBgn0004584
AoedeDioneWallaceiSilvaniformisMelpomene	Contracted	OG_3058	-1	FBgn0034802
AoedeDioneWallaceiSilvaniformisMelpomene	Contracted	OG_3084	-1	FBgn0000473
AoedeDioneWallaceiSilvaniformisMelpomene	Contracted	OG_3206	-1	FBgn0034802
AoedeDioneWallaceiSilvaniformisMelpomene	Contracted	OG_3239	-1	FBgn0003890
AoedeDioneWallaceiSilvaniformisMelpomene	Contracted	OG_3245	-1	FBgn0034802
AoedeDioneWallaceiSilvaniformisMelpomene	Contracted	OG_3352	-1	FBgn0042098
AoedeDioneWallaceiSilvaniformisMelpomene	Contracted	OG_3484	-1	FBgn0036659
AoedeDioneWallaceiSilvaniformisMelpomene	Contracted	OG_3551	-3	FBgn0023171
AoedeDioneWallaceiSilvaniformisMelpomene	Contracted	OG_4436	-1	FBgn0260991
AoedeDioneWallaceiSilvaniformisMelpomene	Contracted	OG_4470	-1	FBgn0013810
AoedeDioneWallaceiSilvaniformisMelpomene	Contracted	OG_4615	-1	FBgn0031619
AoedeDioneWallaceiSilvaniformisMelpomene	Contracted	OG_4944	-1	FBgn0000140
AoedeDioneWallaceiSilvaniformisMelpomene	Contracted	OG_5524	-1	FBgn0004584
AoedeDioneWallaceiSilvaniformisMelpomene	Contracted	OG_5980	-1	FBgn0042098
AoedeDioneWallaceiSilvaniformisMelpomene	Contracted	OG_6076	-1	FBgn0042098
AoedeDioneWallaceiSilvaniformisMelpomene	Contracted	OG_6373	-1	FBgn0040349
AoedeDioneWallaceiSilvaniformisMelpomene	Contracted	OG_6438	-1	FBgn0027601
AoedeDioneWallaceiSilvaniformisMelpomene	Contracted	OG_6683	-1	FBgn0053087
AoedeDioneWallaceiSilvaniformisMelpomene	Contracted	OG_6834	-1	FBgn0261800
AoedeDioneWallaceiSilvaniformisMelpomene	Contracted	OG_13095	-1	FBgn0266724
AoedeDioneWallaceiSilvaniformisMelpomene	Contracted	OG_16661	-1	FBgn0039937
AoedeDioneWallaceiSilvaniformisMelpomene	Contracted	OG_19271	-1	FBgn0085405
AoedeDioneWallaceiSilvaniformisMelpomene	Contracted	OG_21592	-1	FBgn0053196
AoedeDioneWallaceiSilvaniformisMelpomene	Expanded	OG_6030	1	FBgn0262127
SaraSaphoErato	Contracted	OG_76	-1	FBgn0026189
SaraSaphoErato	Contracted	OG_767	-1	FBgn0032123
SaraSaphoErato	Contracted	OG_2170	-1	FBgn0028970
SaraSaphoErato	Contracted	OG_3026	-1	FBgn0031690
SaraSaphoErato	Contracted	OG_3629	-1	FBgn0263102
SaraSaphoErato	Contracted	OG_3642	-2	FBgn0037633
SaraSaphoErato	Contracted	OG_4604	-1	FBgn0037633
SaraSaphoErato	Contracted	OG_5414	-1	FBgn0035420
SaraSaphoErato	Contracted	OG_5961	-1	FBgn0040319
SaraSaphoErato	Contracted	OG_6016	-1	FBgn0029697
SaraSaphoErato	Contracted	OG_6175	-1	FBgn0030615
SaraSaphoErato	Contracted	OG_6548	-1	FBgn0031619
SaraSaphoErato	Contracted	OG_6753	-1	FBgn0031540
SaraSaphoErato	Contracted	OG_7011	-1	FBgn0031722
SaraSaphoErato	Contracted	OG_9382	-1	FBgn0015269
SaraSaphoErato	Contracted	OG_10054	-1	FBgn0031374
SaraSaphoErato	Contracted	OG_10991	-1	FBgn0260943
SaraSaphoErato	Contracted	OG_11391	-1	FBgn0030590
SaraSaphoErato	Contracted	OG_11805	-1	FBgn0052319
SaraSaphoErato	Contracted	OG_12174	-1	-
SaraSaphoErato	Contracted	OG_12436	-1	FBgn0028570
SaraSaphoErato	Contracted	OG_13145	-1	FBgn0031760
SaraSaphoErato	Contracted	OG_16714	-1	FBgn0283651
SaraSaphoErato	Contracted	OG_18108	-1	FBgn0029966
SaraSaphoErato	Contracted	OG_18423	-1	FBgn0031039
SaraSaphoErato	Contracted	OG_28551	-1	FBgn0265356
SaraSaphoErato	Contracted	OG_30129	-1	FBgn0037633
SaraSaphoErato	Contracted	OG_31103	-1	FBgn0027553
SaraSaphoErato	Contracted	OG_31564	-1	FBgn0027572
SaraSaphoErato	Contracted	OG_33200	-1	FBgn0051546
SaraSaphoErato	Contracted	OG_33484	-1	FBgn0041713
SaraSaphoErato	Expanded	OG_2865	1	FBgn0085450
SaraSaphoErato	Expanded	OG_3097	1	FBgn0032264
SaraSaphoErato	Expanded	OG_3206	1	FBgn0034802
SaraSaphoErato	Expanded	OG_3302	1	FBgn0037633
SaraSaphoErato	Expanded	OG_3451	1	FBgn0034166
SaraSaphoErato	Expanded	OG_3774	1	FBgn0000594
SaraSaphoErato	Expanded	OG_4229	1	FBgn0034580
SaraSaphoErato	Expanded	OG_4451	1	FBgn0039476
SaraSaphoErato	Expanded	OG_5991	1	FBgn0030590
SaraSaphoErato	Expanded	OG_6145	1	FBgn0086687
SaraSaphoErato	Expanded	OG_6528	1	FBgn0028841
SaraSaphoErato	Expanded	OG_6537	1	FBgn0032264
SaraSaphoErato	Expanded	OG_6596	1	FBgn0034802
SaraSaphoErato	Expanded	OG_6689	1	FBgn0038087
SaraSaphoErato	Expanded	OG_8587	1	FBgn0053196
SaraSaphoErato	Expanded	OG_9036	2	FBgn0038118
SaraSaphoErato	Expanded	OG_11392	1	FBgn0038140
SaraSaphoErato	Expanded	OG_11436	1	FBgn0034470
SaraSaphoErato	Expanded	OG_12533	1	FBgn0034166
SilvaniformisMelpomene	Contracted	OG_76	-1	FBgn0026189
SilvaniformisMelpomene	Contracted	OG_2788	-2	FBgn0034802
SilvaniformisMelpomene	Contracted	OG_2928	-1	FBgn0004584
SilvaniformisMelpomene	Contracted	OG_3434	-1	FBgn0043362
SilvaniformisMelpomene	Contracted	OG_5709	-1	FBgn0003891
SilvaniformisMelpomene	Contracted	OG_6395	-1	FBgn0033504
SilvaniformisMelpomene	Contracted	OG_33717	-1	FBgn0002774
SilvaniformisMelpomene	Expanded	OG_141	1	FBgn0036405
SilvaniformisMelpomene	Expanded	OG_321	1	FBgn0051954
SilvaniformisMelpomene	Expanded	OG_2914	3	FBgn0036659
SilvaniformisMelpomene	Expanded	OG_3058	3	FBgn0034802
SilvaniformisMelpomene	Expanded	OG_3084	1	FBgn0000473
SilvaniformisMelpomene	Expanded	OG_3097	1	FBgn0032264
SilvaniformisMelpomene	Expanded	OG_3206	1	FBgn0034802
SilvaniformisMelpomene	Expanded	OG_3451	1	FBgn0034166
SilvaniformisMelpomene	Expanded	OG_3497	1	FBgn0265356
SilvaniformisMelpomene	Expanded	OG_3551	1	FBgn0023171
SilvaniformisMelpomene	Expanded	OG_3774	1	FBgn0000594
SilvaniformisMelpomene	Expanded	OG_3825	1	FBgn0264574
SilvaniformisMelpomene	Expanded	OG_4081	2	FBgn0038642
SilvaniformisMelpomene	Expanded	OG_4091	1	FBgn0053080
SilvaniformisMelpomene	Expanded	OG_4099	2	FBgn0031619
SilvaniformisMelpomene	Expanded	OG_4331	1	FBgn0034184
SilvaniformisMelpomene	Expanded	OG_4451	2	FBgn0039476
SilvaniformisMelpomene	Expanded	OG_4581	2	FBgn0040349
SilvaniformisMelpomene	Expanded	OG_4615	1	FBgn0031619
SilvaniformisMelpomene	Expanded	OG_5513	1	FBgn0053140
SilvaniformisMelpomene	Expanded	OG_6145	1	FBgn0086687
SilvaniformisMelpomene	Expanded	OG_6175	1	FBgn0030615
SilvaniformisMelpomene	Expanded	OG_6266	1	FBgn0033028
SilvaniformisMelpomene	Expanded	OG_6438	2	FBgn0027601
SilvaniformisMelpomene	Expanded	OG_6462	1	FBgn0013770
SilvaniformisMelpomene	Expanded	OG_6528	2	FBgn0028841
SilvaniformisMelpomene	Expanded	OG_8073	1	FBgn0051548
SilvaniformisMelpomene	Expanded	OG_8129	1	FBgn0259791
SilvaniformisMelpomene	Expanded	OG_8587	1	FBgn0053196
SilvaniformisMelpomene	Expanded	OG_8664	1	FBgn0040376
SilvaniformisMelpomene	Expanded	OG_10675	1	FBgn0015600
SilvaniformisMelpomene	Expanded	OG_11208	1	FBgn0000473
SilvaniformisMelpomene	Expanded	OG_11473	1	FBgn0035199
SilvaniformisMelpomene	Expanded	OG_11610	1	FBgn0037323
SilvaniformisMelpomene	Expanded	OG_12533	1	FBgn0034166
SilvaniformisMelpomene	Expanded	OG_26886	1	FBgn0030590
SilvaniformisMelpomene	Expanded	OG_31046	1	FBgn0036996
Erato	Contracted	OG_2708	-1	FBgn0036622
Erato	Contracted	OG_2979	-1	FBgn0086604
Erato	Contracted	OG_3018	-1	FBgn0002031
Erato	Contracted	OG_3128	-1	FBgn0026250
Erato	Contracted	OG_3168	-1	FBgn0036659
Erato	Contracted	OG_3196	-1	FBgn0040257
Erato	Contracted	OG_4670	-1	FBgn0005666
Erato	Contracted	OG_4971	-1	FBgn0020309
Erato	Contracted	OG_5008	-1	-
Erato	Contracted	OG_8355	-1	FBgn0024912
Erato	Contracted	OG_9189	-1	FBgn0010434
Erato	Contracted	OG_10996	-1	FBgn0005536
Erato	Contracted	OG_11753	-1	FBgn0005666
Erato	Contracted	OG_12399	-1	FBgn0033085
Erato	Contracted	OG_12408	-1	FBgn0016684
Erato	Contracted	OG_13100	-1	FBgn0003890
Erato	Contracted	OG_13187	-1	FBgn0003134
Erato	Contracted	OG_14597	-1	FBgn0010097
Erato	Contracted	OG_16661	-1	FBgn0039937
Erato	Contracted	OG_18520	-1	FBgn0259162
Erato	Contracted	OG_19271	-1	FBgn0085405
Erato	Contracted	OG_19631	-1	FBgn0085390
Erato	Contracted	OG_21069	-1	FBgn0040623
Erato	Contracted	OG_24642	-1	-
Erato	Contracted	OG_26393	-1	FBgn0053852
Erato	Contracted	OG_33035	-1	FBgn0011661
Erato	Expanded	OG_842	1	FBgn0005670
Erato	Expanded	OG_1161	1	FBgn0000579
Erato	Expanded	OG_1430	1	FBgn0264574
Erato	Expanded	OG_3001	1	FBgn0042098
Erato	Expanded	OG_3084	1	FBgn0000473
Erato	Expanded	OG_3097	1	FBgn0032264
Erato	Expanded	OG_3206	1	FBgn0034802
Erato	Expanded	OG_3330	2	FBgn0264574
Erato	Expanded	OG_3352	1	FBgn0042098
Erato	Expanded	OG_3551	2	FBgn0023171
Erato	Expanded	OG_3774	1	FBgn0000594
Erato	Expanded	OG_4335	1	FBgn0027538
Erato	Expanded	OG_4441	1	FBgn0031619
Erato	Expanded	OG_4451	2	FBgn0039476
Erato	Expanded	OG_4546	1	FBgn0265002
Erato	Expanded	OG_5996	1	FBgn0037537
Erato	Expanded	OG_6438	1	FBgn0027601
Erato	Expanded	OG_6598	1	FBgn0028500
Erato	Expanded	OG_11473	1	FBgn0035199
Erato	Expanded	OG_11610	1	FBgn0037323
Erato	Expanded	OG_18028	1	FBgn0033367
Erato	Expanded	OG_21723	1	FBgn0000473
Erato	Expanded	OG_28049	2	FBgn0033308
SaraSapho	Contracted	OG_1469	-1	FBgn0000473
SaraSapho	Contracted	OG_3010	-1	FBgn0261243
SaraSapho	Contracted	OG_3097	-1	FBgn0032264
SaraSapho	Contracted	OG_3338	-1	FBgn0004584
SaraSapho	Contracted	OG_3769	-1	FBgn0264574
SaraSapho	Contracted	OG_3963	-1	FBgn0031061
SaraSapho	Contracted	OG_4470	-1	FBgn0013810
SaraSapho	Contracted	OG_4615	-1	FBgn0031619
SaraSapho	Contracted	OG_5690	-1	FBgn0263980
SaraSapho	Contracted	OG_6076	-1	FBgn0042098
SaraSapho	Contracted	OG_6635	-1	FBgn0021796
SaraSapho	Contracted	OG_6805	-1	FBgn0035953
SaraSapho	Contracted	OG_7053	-1	-
SaraSapho	Contracted	OG_10677	-1	FBgn0015600
SaraSapho	Contracted	OG_10995	-1	FBgn0039084
SaraSapho	Contracted	OG_12451	-1	FBgn0039131
SaraSapho	Contracted	OG_13535	-1	FBgn0034902
SaraSapho	Contracted	OG_18704	-1	FBgn0016754
SaraSapho	Contracted	OG_21086	-1	FBgn0034729
SaraSapho	Contracted	OG_33717	-1	FBgn0002774

## Sheet: Table S6
							Expanded/Contracted gene families
					near-scOG loci		Heliconiinae	Heliconiini	Dione/Agraulis/ Eueides/Heliconius	Eueides/Heliconius	Eueides	Heliconius	Erato/ Sara-Sapho	Erato	Sara-Sapho	Aoede/Doris/Wallacei Silvaniformis/Melpomene	H. aoede	Doris/Wallacei Silvaniformis/Melpomene	Doris	Wallacei Silvaniformis/Melpomene	Wallacei	Silvaniformis/Melpomene
PFAM_id	Name	λ	Instability score	number of OGs	Eueides	Heliconius
PF00001	Rhodopsin-like receptors*	0.00454737	35.6239	180	60	50	-	-	-	-	+1/-1	+1	-	-2	-	-	+1/-9	-	+1/-5	-	+2/-1	-
PF00002	Secretin receptor family	0.00732764	21.6613	32	11	8	-	-	-	-	-	-	-	-	-	-	-	-	-	-	+1	-
PF00005	ABC transporters	0.00734427	28.5812	125	26	11	+1	+1	-	-	+1	-1	-	-	-	-	-1	-	+1	-	-	-
PF00043	Glutathione S-transferase (GST)	0.00542392	22.4547	15	8	4	-	+1	-	-	-	-	-1	-	-	-	-2	-	-	-	-	-
PF00067	P450	0.00656356	47.8879	136	31	15	+1	-	-	+2	+1/-1	-	+1/-2	-	-	-1	+2/-3	-	-	+1	+3/-2	+2
PF00069	Protein kinase domain*	0.00650482	29.0581	255	102	95	-	-	-	-	-3	-	-	-1	-	-	-6	+1	+1/-2	-	-3	+1
PF00083	Sugar porter family MFS transporter	0.00696528	37.9321	183	64	51	+1	+3	-	+1	+1/-2	-	+1/-1	-2	-1	-	+1/-4	-	-3	+1	+2/-3	+1/-1
PF00089	Trypsin*	0.00635752	40.4471	256	72	69	+1	+1	+1	+1	+3	-1	+1/-1	-	-	-2	-3	-	-2	+1	+1/-1	-1
PF00135	Carboxylesterase family*	0.00889076	32.6214	109	27	24	-	+1	-	+1	-	-	-	-	-	-	-2	-	-	-	-	-1
PF00151	Lipase	0.00661336	32.6023	64	24	22	+1	-	+1	+1	-1	+2	+3	-	-	-	-3	-	-	-	-1	+1
PF00153	MC/SLC25 family protein	0.00397575	30.6538	64	26	23	-	-	-	-	-1	-	-	-	-	-	-	-	-	-	+1/-1	-
PF00201	UDP-glucoronosyl and UDP-glucosyl transferase	0.00551085	45.2764	55	11	6	-	-	-	-	-1	-	-	-	-	-	-2	-	+1/-2	+1	-	-
PF00209	SNF domain-containing protein	0.00650735	53.6024	25	11	4	-	-	-	-	-	-	-	-	-	-	-	-	-1	-	-	-
PF00232	Beta-glucosidase 2, glycosyl-hydrolase family 116	0.0055557	70.8497	37	5	1	-	+1/-1	-	+3	-1	-	-3	-	-	-1	-3	-	+1/-1	+1	-	+1
PF00291	Pyridoxal-phosphate dependent enzyme	0.00575492	20.3681	21	6	1	-	-	-	-	-	-	-	-	-	-	-	-	-	-	-	-
PF00348	Polyprenyl synthetase	0.00547564	28.5717	23	5	5	-	-	-	-	-1	-	-	-2	-	-	-2	-	-1	-	-2	-
PF00372	Hemocyanin superfamily M & N	0.00657122	48.0146	13	5	6	+1	-	+1	+1	-	-	+1	-	-	-	-2	-	-	-	+1	-
PF00379	Insect cuticle protein	0.00681486	33.9495	206	81	83	+2	+2	-	-1	+2-1	-	+1	-	-	-	+1	-	+2/-2	-	-	+1
PF00474	Sodium:solute symporter family	0.00477613	46.299	10	7	3	-	-	-	-	-	-	-	-	-	-	-	-	-	-	-	-
PF00520	Ion transport protein*	0.00721942	68.8135	57	21	26	-	-	-	-	-1	-	-	-	-	+1	+2/-1	-	+1/-1	-	-1	-
PF00581	Rhodanese-like domain	0.00288507	17.8553	19	3	5	-	-	-	-	-	-	-	-	-	-	-	+1	-	-	-	-
PF00854	The POT (proton-dependent oligopeptide transport) family	0.00560489	83.0267	3	2	-	-	-	-	-	-	-	-	-	+1	-	-	-	-	-	-	-
PF00858	Amiloride-sensitive sodium channel family protein - Solute carrier (SLC) transporter superfamily	0.0047457	43.4472	46	8	5	-	-1	-	-	-	-	-	-	-	-	-	-	-	-	-	-
PF00860	Permease family	0.00571138	18.8638	21	1	-	-	-	-	-	-	-	-	-	-	-	-	-	-	-	-	-
PF00892	DMT family transporter	0.00331344	23.5	1	-	-	-	-	-	-	-	-	-	-	-	-	-	-	-	-	-	-
PF00909	Ammonium Transporter Family	0.00593981	44.05	4	1	-	-	-	-	-	-	-	-	-	-	-	-	-	-	-	-	-
PF00916	Sulfate_transp and STAS domain-containing protein	0.00724905	52.463	10	7	2	-	-	-	-	+1	-	-	-	-	-	-	-	-	-	+1	-
PF00939	Anion permease ArsB/NhaD	0.00540483	22.2747	15	1	3	-	-	-	-	-	-	-	-1	-	-	-1	-	-	-	-1	-
PF00999	Cation:proton antiporter	0.00664018	39.9685	13	4	4	-	-	-	-	-	-	-	-	-	-	-	-	-1	-	-1	-
PF01347	Vitellogenin_N	0.00313168	24.28	5	3	1	-	-	-	-	-	-	-	-	-	-	-	-	-	-	-	-
PF01490	Amino acid transporter	0.00648076	39.7535	37	17	8	-	-	-	-	-	-	-	-	-	-	+1	-	-	-	-	-
PF01545	Cation transporter	0.00448087	24.0515	13	4	3	-	-	-	-	-	-	-	-	-	-	-	-	-	-	-	-
PF01699	Sodium/calcium exchanger protein	0.00710124	44.6415	13	4	3	+1	-	-	-	-	-	-	-	-	-	-	-	-1	-	-	-
PF01733	Nucleoside_tran super family	0.00325926	34.258	5	1	2	-	-	-	-	-	-	-	-	-	-	-	-	-	-	-	-
PF01758	Sodium Bile acid symporter family	0.0014984	19.5	1	-	-	-	-	-	-	-	-	-	-	-	-	-	-	-	-	-	-
PF01769	Divalent cation transporter	0.00389174	50.885	2	1	-	-	-	-	-	-	-	-	-	-	-	-	-	-	-	-	-
PF01770	Reduced folate carrier	0.00632538	25.45	4	-	1	-	-	-	-	-	-	-	-	-	-	-	-	-	-	-	-
PF02437	SKI/SNO/DAC family	0.00567823	60.8533	3	1	-	-	-	-	-	-	-	-	-	-	-	-	-	-	-	-	-
PF02460	Niemann-Pick C1	0.00465693	41.655	6	3	4	-	-	-	-	-	-	-	-	-	-	-	-	-	-	-	-
PF02535	ZIP family metal transporter	0.0038958	20.0769	26	6	1	-	-	-	-	-	-	-	-	-	-	+1	-	-	-	-	-
PF03137	OATP super family	0.00540483	67.695	6	2	1	-	-	-	-	-	-	-1	-	-	-	-1	-	+1	-	-	-
PF03151	Triose-phosphate Transporter family	0.00131494	19.6825	4	3	4	-	-	-	-	-	-	-	-	-	-	-	-	-	-	-	-
PF03189	Otopetrin	0.00503659	40.1486	7	2	1	-	-	-	-	-	-	-	-	-	-	-	-	-	-	-	-
PF03600	Citrate transporter	0.0054773	20.6892	13	-	1	-	-	-	-	-	-	-	-	-	-	-	-	-	-	-	-
PF04193	PQ-loop repeat-containing protein	0.0017902	16.34	12	2	3	-	-	-	-	-	-	-	-	-	-	-	-	-	-	-	-
PF04756	OST3/OST6 family protein	0.00364557	33.5	2	1	1	-	-	-	-	-	-	-	-	-	-	-	-	-	-	-	-
PF05653	EamA-like transporter family	0.00151535	17.5	1	-	-	-	-	-	-	-	-	-	-	-	-	-	-	-	-	-	-
PF06027	Solute carrier family 35	0.00540482	19.3333	3	2	2	-	-	-	-	-	-	-	-	-	-	-	-	-	-	-	-
PF06757	Insect allergen related repeat, nitrile-specifier detoxification	0.00421732	45.25	2	-	1	-	-	-	-	-	-	-	-	-	-	-	-	-	-	-	-
PF07662	Na+ dependent nucleoside transporter	0.0023409	19.1667	3	1	-	-	-	-	-	-	-	-	-	-	-	-	-	-	-	-	-
PF07690	MFS transporter	0.00694959	30.4416	189	69	64	-	-	-	-	+2/-2	+1	-	-1	-	-	-6	-	-3	-	+2/-1	-
PF07898	Osiris*	0.00583084	23.8113	38	24	16	-	-	-	-	-	-	-	-	-	-	-	-	-	-	-	-
PF08449	UAA transporter family	0.00184105	23.9455	11	2	3	-	-	-	-	-	-	-	-	-	-	-	-	-	-	-	-
PF13499	EF-hand_7*	0.00566845	24.6497	63	24	35	-	-	-	-	-	-	-	-1	-	-	-1	-	-	-	-	-
PF13520	APC family permease	0.00357716	43.8929	17	10	3	-	-	-	-	-1	-	-	-1	-	-	-1	-	-	-1	-	-
PF13649	Methyltransferase domain	0.00545395	35.7655	11	1	3	-	-	-	-	-1	+1	-	-	-	-	-1	-	-	-	-	+1
PF17223	Cuticle protein CPCFC	0.00564046	146.915	1	1	1	-	-	-	-	-	+1	+1	-	-	-	-	-	-	-	-	+1
	* PFAMs with a significant difference in the distribution of ω between Euriedes and Heliconius

## Sheet: Table S7
OG_uniqID	OG	PhyloPos	FlyBaseGnID	EntrezID	GeneName	Ntaxa	OGavLen_BefFil	STD_BefFil	OGavLen_AftFil	STD_AftFil	Model	OG_w	Branch	Branch_w	Percentage	Pvalue	Padjusted
OG_10000.Heliconius	OG_10000	Nymphalidae	sp|Q5ZIB8|PIRK5_CHICK	-	-	55	561.5454545454545	89.49145579974116	478.74545454545455	2.4061903636486663	012345	0.03795145247374079	Heliconius	0.141643716248	1	1	1
OG_10000.Heliconiini	OG_10000	Nymphalidae	sp|Q5ZIB8|PIRK5_CHICK	-	-	55	561.5454545454545	89.49145579974116	478.74545454545455	2.4061903636486663	012345	0.03795145247374079	Heliconiini	0	1	1	1
OG_10000.Eueides	OG_10000	Nymphalidae	sp|Q5ZIB8|PIRK5_CHICK	-	-	55	561.5454545454545	89.49145579974116	478.74545454545455	2.4061903636486663	012345	0.03795145247374079	Eueides	0	1	1	1
OG_10002.Heliconius	OG_10002	Nymphalidae	FBgn0041627	34930	Ku80	62	1983.6774193548388	407.13787686782115	1955.758064516129	409.38674378068316	012345	0.1318956134107877	Heliconius	25.0317207113	0.00715101773798	0.0281833488583	0.140916744292
OG_10002.EueidesHeliconius	OG_10002	Nymphalidae	FBgn0041627	34930	Ku80	62	1983.6774193548388	407.13787686782115	1955.758064516129	409.38674378068316	012345	0.1318956134107877	EueidesHeliconius	0.107387357839	1	1	1
OG_10002.Heliconiini	OG_10002	Nymphalidae	FBgn0041627	34930	Ku80	62	1983.6774193548388	407.13787686782115	1955.758064516129	409.38674378068316	012345	0.1318956134107877	Heliconiini	2.17821662348	0.0396823686943	0.353360605729	1
OG_10002.DioneAgraulisEueidesHeliconius	OG_10002	Nymphalidae	FBgn0041627	34930	Ku80	62	1983.6774193548388	407.13787686782115	1955.758064516129	409.38674378068316	012345	0.1318956134107877	DioneAgraulisEueidesHeliconius	0.138429873025	1	1	1
OG_10002.Eueides	OG_10002	Nymphalidae	FBgn0041627	34930	Ku80	62	1983.6774193548388	407.13787686782115	1955.758064516129	409.38674378068316	012345	0.1318956134107877	Eueides	2.68502953486	0.0583016681907	0.0875627299288	0.350250919715
OG_10003.Heliconiini	OG_10003	Nymphalidae	-	47757	-	61	449.7049180327869	37.977277184789465	411.6885245901639	26.363499968897358	010020	0.08625541219826185	Heliconiini	0.105756894468	1	1	1
OG_10003.Eueides	OG_10003	Nymphalidae	-	47757	-	61	449.7049180327869	37.977277184789465	411.6885245901639	26.363499968897358	010020	0.08625541219826185	Eueides	0	1	1	1
OG_10004.Heliconius	OG_10004	Nymphalidae	FBgn0046999	36893	CG6429	60	467.15	120.68441282949509	428.9	45.404735435855144	012345	0.08513157434348262	Heliconius	0.0146443837411	1	1	1
OG_10004.Heliconiini	OG_10004	Nymphalidae	FBgn0046999	36893	CG6429	60	467.15	120.68441282949509	428.9	45.404735435855144	012345	0.08513157434348262	Heliconiini	4.63224646176	0.0599841521011	0.114714262751	0.344142788253
OG_10004.Eueides	OG_10004	Nymphalidae	FBgn0046999	36893	CG6429	60	467.15	120.68441282949509	428.9	45.404735435855144	012345	0.08513157434348262	Eueides	0	1	1	1
OG_10005.Heliconius	OG_10005	Nymphalidae	FBgn0034165	36894	CG6435	55	455.1818181818182	122.69757216373937	428.0181818181818	50.51822026271706	012345	0.1095033112547348	Heliconius	0.077781667863	1	1	1
OG_10005.EueidesHeliconius	OG_10005	Nymphalidae	FBgn0034165	36894	CG6435	55	455.1818181818182	122.69757216373937	428.0181818181818	50.51822026271706	012345	0.1095033112547348	EueidesHeliconius	0.0370030917113	1	1	1
OG_10005.Heliconiini	OG_10005	Nymphalidae	FBgn0034165	36894	CG6435	55	455.1818181818182	122.69757216373937	428.0181818181818	50.51822026271706	012345	0.1095033112547348	Heliconiini	0.0869519913601	1	1	1
OG_10005.DioneAgraulisEueidesHeliconius	OG_10005	Nymphalidae	FBgn0034165	36894	CG6435	55	455.1818181818182	122.69757216373937	428.0181818181818	50.51822026271706	012345	0.1095033112547348	DioneAgraulisEueidesHeliconius	0.448694628947	1	1	1
OG_10005.Eueides	OG_10005	Nymphalidae	FBgn0034165	36894	CG6435	55	455.1818181818182	122.69757216373937	428.0181818181818	50.51822026271706	012345	0.1095033112547348	Eueides	0.0815955458791	1	1	1
OG_10007.Heliconius	OG_10007	Nymphalidae	sp|Q8JHF2|LFNG_DANRE	-	-	61	929.8032786885246	167.85139989963324	893.5573770491803	166.42130268256753	012345	0.07228680378529775	Heliconius	0.144540090031	1	1	1
OG_10007.Heliconiini	OG_10007	Nymphalidae	sp|Q8JHF2|LFNG_DANRE	-	-	61	929.8032786885246	167.85139989963324	893.5573770491803	166.42130268256753	012345	0.07228680378529775	Heliconiini	1.32107776268	0.0422569555598	0.5	1
OG_10007.Eueides	OG_10007	Nymphalidae	sp|Q8JHF2|LFNG_DANRE	-	-	61	929.8032786885246	167.85139989963324	893.5573770491803	166.42130268256753	012345	0.07228680378529775	Eueides	0.0212446313064	1	1	1
OG_1001.Heliconius	OG_1001	Nymphalidae	FBgn0000552	40818	Edg84A	59	681.7118644067797	198.9831822250021	610.1694915254237	23.808667089003805	012310	0.1153993710240163	Heliconius	0.152939905475	1	1	1
OG_1001.EueidesHeliconius	OG_1001	Nymphalidae	FBgn0000552	40818	Edg84A	59	681.7118644067797	198.9831822250021	610.1694915254237	23.808667089003805	012310	0.1153993710240163	EueidesHeliconius	0	1	1	1
OG_1001.Heliconiini	OG_1001	Nymphalidae	FBgn0000552	40818	Edg84A	59	681.7118644067797	198.9831822250021	610.1694915254237	23.808667089003805	012310	0.1153993710240163	Heliconiini	0.0295445515878	1	1	1
OG_1001.Eueides	OG_1001	Nymphalidae	FBgn0000552	40818	Edg84A	59	681.7118644067797	198.9831822250021	610.1694915254237	23.808667089003805	012310	0.1153993710240163	Eueides	0.0264690651114	1	1	1
OG_10010.Heliconius	OG_10010	Nymphalidae	sp|Q8R4E9|CDT1_MOUSE	-	-	63	1754.7619047619048	238.0997999562978	1706.142857142857	238.76732761140894	012345	0.1251573338540335	Heliconius	0.122490785321	1	1	1
OG_10010.EueidesHeliconius	OG_10010	Nymphalidae	sp|Q8R4E9|CDT1_MOUSE	-	-	63	1754.7619047619048	238.0997999562978	1706.142857142857	238.76732761140894	012345	0.1251573338540335	EueidesHeliconius	0.0795959413495	1	1	1
OG_10010.Heliconiini	OG_10010	Nymphalidae	sp|Q8R4E9|CDT1_MOUSE	-	-	63	1754.7619047619048	238.0997999562978	1706.142857142857	238.76732761140894	012345	0.1251573338540335	Heliconiini	24.2145651088	0.0125233178168	0.186625540932	0.746502163728
OG_10010.DioneAgraulisEueidesHeliconius	OG_10010	Nymphalidae	sp|Q8R4E9|CDT1_MOUSE	-	-	63	1754.7619047619048	238.0997999562978	1706.142857142857	238.76732761140894	012345	0.1251573338540335	DioneAgraulisEueidesHeliconius	565.450591592	0.00572762600922	0.0336890966785	0.168445483392
OG_10010.Eueides	OG_10010	Nymphalidae	sp|Q8R4E9|CDT1_MOUSE	-	-	63	1754.7619047619048	238.0997999562978	1706.142857142857	238.76732761140894	012345	0.1251573338540335	Eueides	0.0831835348889	1	1	1
OG_10011.Heliconius	OG_10011	Nymphalidae	sp|Q9NRW4|DUS22_HUMAN	-	-	63	980.4285714285714	193.41211155964146	834.7142857142857	160.86970263069983	012310	0.04183611329944425	Heliconius	0.0202943693726	1	1	1
OG_10011.EueidesHeliconius	OG_10011	Nymphalidae	sp|Q9NRW4|DUS22_HUMAN	-	-	63	980.4285714285714	193.41211155964146	834.7142857142857	160.86970263069983	012310	0.04183611329944425	EueidesHeliconius	0.0199563917329	1	1	1
OG_10011.Heliconiini	OG_10011	Nymphalidae	sp|Q9NRW4|DUS22_HUMAN	-	-	63	980.4285714285714	193.41211155964146	834.7142857142857	160.86970263069983	012310	0.04183611329944425	Heliconiini	0.0257788128126	1	1	1
OG_10011.DioneAgraulisEueidesHeliconius	OG_10011	Nymphalidae	sp|Q9NRW4|DUS22_HUMAN	-	-	63	980.4285714285714	193.41211155964146	834.7142857142857	160.86970263069983	012310	0.04183611329944425	DioneAgraulisEueidesHeliconius	0	1	1	1
OG_10011.Eueides	OG_10011	Nymphalidae	sp|Q9NRW4|DUS22_HUMAN	-	-	63	980.4285714285714	193.41211155964146	834.7142857142857	160.86970263069983	012310	0.04183611329944425	Eueides	0.039943266567	1	1	1
OG_10012.Heliconius	OG_10012	Nymphalidae	sp|P29939|YCB6_PSEDE	-	-	54	345.0	35.9119293086109	333.72222222222223	4.652425359787631	012345	0.1524800029121276	Heliconius	0	1	1	1
OG_10012.EueidesHeliconius	OG_10012	Nymphalidae	sp|P29939|YCB6_PSEDE	-	-	54	345.0	35.9119293086109	333.72222222222223	4.652425359787631	012345	0.1524800029121276	EueidesHeliconius	0.153708961945	1	1	1
OG_10012.Heliconiini	OG_10012	Nymphalidae	sp|P29939|YCB6_PSEDE	-	-	54	345.0	35.9119293086109	333.72222222222223	4.652425359787631	012345	0.1524800029121276	Heliconiini	10000000000	1	0.323586012902	1
OG_10012.Eueides	OG_10012	Nymphalidae	sp|P29939|YCB6_PSEDE	-	-	54	345.0	35.9119293086109	333.72222222222223	4.652425359787631	012345	0.1524800029121276	Eueides	0.126034606127	1	1	1
OG_10013.Eueides	OG_10013	Nymphalidae	sp|P54318|LIPR2_RAT	-	-	63	923.952380952381	157.34628967752448	876.8095238095239	185.98479688190056	012230	0.06541149789411201	Eueides	2.21616399465	0.0451924914612	0.343045495784	0.343045495784
OG_10017.Heliconius	OG_10017	Nymphalidae	FBgn0039897	43780	CG1674	62	904.6935483870968	202.38087604967708	850.9354838709677	149.9178130722923	012230	0.04834884085743389	Heliconius	0.0521447194135	1	1	1
OG_10017.EueidesHeliconius	OG_10017	Nymphalidae	FBgn0039897	43780	CG1674	62	904.6935483870968	202.38087604967708	850.9354838709677	149.9178130722923	012230	0.04834884085743389	EueidesHeliconius	0.0270452821902	1	1	1
OG_10017.Heliconiini	OG_10017	Nymphalidae	FBgn0039897	43780	CG1674	62	904.6935483870968	202.38087604967708	850.9354838709677	149.9178130722923	012230	0.04834884085743389	Heliconiini	0.0310354680392	1	1	1
OG_10017.Eueides	OG_10017	Nymphalidae	FBgn0039897	43780	CG1674	62	904.6935483870968	202.38087604967708	850.9354838709677	149.9178130722923	012230	0.04834884085743389	Eueides	0.0325315627466	1	1	1
OG_10018.Heliconius	OG_10018	Nymphalidae	FBgn0001105	32544	Gbeta13F	60	1057.7	203.81783533341726	985.7	166.80590517124986	012345	0.02283307836601892	Heliconius	14.6933170245	0.00426442863636	0.13808660471	0.13808660471
OG_1002.Heliconius	OG_1002	Nymphalidae	FBgn0032586	34984	Tpr2	63	1431.2380952380952	185.166567166894	1396.904761904762	193.30900621048718	010020	0.0548340209086111	Heliconius	0.122484782659	1	1	1
OG_1002.EueidesHeliconius	OG_1002	Nymphalidae	FBgn0032586	34984	Tpr2	63	1431.2380952380952	185.166567166894	1396.904761904762	193.30900621048718	010020	0.0548340209086111	EueidesHeliconius	0.0403994720245	1	1	1
OG_1002.Heliconiini	OG_1002	Nymphalidae	FBgn0032586	34984	Tpr2	63	1431.2380952380952	185.166567166894	1396.904761904762	193.30900621048718	010020	0.0548340209086111	Heliconiini	1.23503773223	0.0570582046681	0.443866448262	1
OG_1002.Eueides	OG_1002	Nymphalidae	FBgn0032586	34984	Tpr2	63	1431.2380952380952	185.166567166894	1396.904761904762	193.30900621048718	010020	0.0548340209086111	Eueides	9.6373115127	0.00510874151995	0.10266407042	0.410656281679
OG_10020.Heliconius	OG_10020	Nymphalidae	sp|Q91Z92|B3GT6_MOUSE	-	-	63	980.952380952381	173.63302192801598	933.9047619047619	177.34360105306064	012345	0.1405366496332838	Heliconius	0.0491415654574	1	1	1
OG_10020.EueidesHeliconius	OG_10020	Nymphalidae	sp|Q91Z92|B3GT6_MOUSE	-	-	63	980.952380952381	173.63302192801598	933.9047619047619	177.34360105306064	012345	0.1405366496332838	EueidesHeliconius	0.149829614234	1	1	1
OG_10020.Heliconiini	OG_10020	Nymphalidae	sp|Q91Z92|B3GT6_MOUSE	-	-	63	980.952380952381	173.63302192801598	933.9047619047619	177.34360105306064	012345	0.1405366496332838	Heliconiini	1.1927452641	0.170533749522	0.469144727023	1
OG_10020.DioneAgraulisEueidesHeliconius	OG_10020	Nymphalidae	sp|Q91Z92|B3GT6_MOUSE	-	-	63	980.952380952381	173.63302192801598	933.9047619047619	177.34360105306064	012345	0.1405366496332838	DioneAgraulisEueidesHeliconius	0.0417321726931	1	1	1
OG_10020.Eueides	OG_10020	Nymphalidae	sp|Q91Z92|B3GT6_MOUSE	-	-	63	980.952380952381	173.63302192801598	933.9047619047619	177.34360105306064	012345	0.1405366496332838	Eueides	0.173581638182	1	1	1
OG_10021.Heliconius	OG_10021	Nymphalidae	sp|O54862|MBTP2_CRIGR	-	-	62	1318.8870967741937	246.7960569062531	1198.4516129032259	225.66594476444783	012345	0.03786270883931205	Heliconius	0	1	1	1
OG_10021.EueidesHeliconius	OG_10021	Nymphalidae	sp|O54862|MBTP2_CRIGR	-	-	62	1318.8870967741937	246.7960569062531	1198.4516129032259	225.66594476444783	012345	0.03786270883931205	EueidesHeliconius	0.0321769039752	1	1	1
OG_10021.Heliconiini	OG_10021	Nymphalidae	sp|O54862|MBTP2_CRIGR	-	-	62	1318.8870967741937	246.7960569062531	1198.4516129032259	225.66594476444783	012345	0.03786270883931205	Heliconiini	0.0628582453135	1	1	1
OG_10021.Eueides	OG_10021	Nymphalidae	sp|O54862|MBTP2_CRIGR	-	-	62	1318.8870967741937	246.7960569062531	1198.4516129032259	225.66594476444783	012345	0.03786270883931205	Eueides	0.0124438583527	1	1	1
OG_10024.Heliconius	OG_10024	Nymphalidae	sp|Q8R173|ZDHC3_MOUSE	-	-	62	877.8870967741935	116.30717183649311	866.7096774193549	128.61876488499297	012230	0.02150933162545765	Heliconius	0	1	1	1
OG_10024.EueidesHeliconius	OG_10024	Nymphalidae	sp|Q8R173|ZDHC3_MOUSE	-	-	62	877.8870967741935	116.30717183649311	866.7096774193549	128.61876488499297	012230	0.02150933162545765	EueidesHeliconius	0	1	1	1
OG_10024.Heliconiini	OG_10024	Nymphalidae	sp|Q8R173|ZDHC3_MOUSE	-	-	62	877.8870967741935	116.30717183649311	866.7096774193549	128.61876488499297	012230	0.02150933162545765	Heliconiini	1.29863806233	0.0641620804295	0.456962100206	1
OG_10024.Eueides	OG_10024	Nymphalidae	sp|Q8R173|ZDHC3_MOUSE	-	-	62	877.8870967741935	116.30717183649311	866.7096774193549	128.61876488499297	012230	0.02150933162545765	Eueides	0	1	1	1
OG_10027.EueidesHeliconius	OG_10027	Nymphalidae	sp|Q8JHF0|PEN2_DANRE	-	-	51	301.3529411764706	11.478579418513773	300.29411764705884	11.675840848331694	010020	0.08064654966235653	EueidesHeliconius	0.0308621520541	1	1	1
OG_10027.Heliconiini	OG_10027	Nymphalidae	sp|Q8JHF0|PEN2_DANRE	-	-	51	301.3529411764706	11.478579418513773	300.29411764705884	11.675840848331694	010020	0.08064654966235653	Heliconiini	10000000000	1	0.315884363494	1
OG_10027.DioneAgraulisEueidesHeliconius	OG_10027	Nymphalidae	sp|Q8JHF0|PEN2_DANRE	-	-	51	301.3529411764706	11.478579418513773	300.29411764705884	11.675840848331694	010020	0.08064654966235653	DioneAgraulisEueidesHeliconius	0.0254810284513	1	1	1
OG_10027.Eueides	OG_10027	Nymphalidae	sp|Q8JHF0|PEN2_DANRE	-	-	51	301.3529411764706	11.478579418513773	300.29411764705884	11.675840848331694	010020	0.08064654966235653	Eueides	0	1	1	1
OG_10028.Heliconius	OG_10028	Nymphalidae	sp|O33567|IF3_RHOS4	-	-	60	651.1	61.19305516151322	629.75	52.39071959803568	012345	0.1414088964402859	Heliconius	0.106752573071	1	1	1
OG_10028.EueidesHeliconius	OG_10028	Nymphalidae	sp|O33567|IF3_RHOS4	-	-	60	651.1	61.19305516151322	629.75	52.39071959803568	012345	0.1414088964402859	EueidesHeliconius	0.0669923029781	1	1	1
OG_10028.Heliconiini	OG_10028	Nymphalidae	sp|O33567|IF3_RHOS4	-	-	60	651.1	61.19305516151322	629.75	52.39071959803568	012345	0.1414088964402859	Heliconiini	0.624530518413	0.208359384245	1	1
OG_10028.Eueides	OG_10028	Nymphalidae	sp|O33567|IF3_RHOS4	-	-	60	651.1	61.19305516151322	629.75	52.39071959803568	012345	0.1414088964402859	Eueides	0.192427505287	1	1	1
OG_10029.Heliconius	OG_10029	Nymphalidae	sp|P33363|BGLX_ECOLI	-	-	63	638.8571428571429	49.93546856101546	614.2380952380952	51.86512247845574	012345	0.1747905258425549	Heliconius	0.18298595997	1	1	1
OG_10029.EueidesHeliconius	OG_10029	Nymphalidae	sp|P33363|BGLX_ECOLI	-	-	63	638.8571428571429	49.93546856101546	614.2380952380952	51.86512247845574	012345	0.1747905258425549	EueidesHeliconius	0.147449768229	1	1	1
OG_10029.Heliconiini	OG_10029	Nymphalidae	sp|P33363|BGLX_ECOLI	-	-	63	638.8571428571429	49.93546856101546	614.2380952380952	51.86512247845574	012345	0.1747905258425549	Heliconiini	0.260001718994	1	1	1
OG_10029.Eueides	OG_10029	Nymphalidae	sp|P33363|BGLX_ECOLI	-	-	63	638.8571428571429	49.93546856101546	614.2380952380952	51.86512247845574	012345	0.1747905258425549	Eueides	0.199502177919	1	1	1
OG_1003.Heliconius	OG_1003	Nymphalidae	-	47757	-	59	748.2203389830509	93.97512613499639	705.8644067796611	67.87337603066929	012310	0.1016795155876073	Heliconius	0.0225885856809	1	1	1
OG_1003.EueidesHeliconius	OG_1003	Nymphalidae	-	47757	-	59	748.2203389830509	93.97512613499639	705.8644067796611	67.87337603066929	012310	0.1016795155876073	EueidesHeliconius	0	1	1	1
OG_1003.Heliconiini	OG_1003	Nymphalidae	-	47757	-	59	748.2203389830509	93.97512613499639	705.8644067796611	67.87337603066929	012310	0.1016795155876073	Heliconiini	0.0498602619509	1	1	1
OG_1003.DioneAgraulisEueidesHeliconius	OG_1003	Nymphalidae	-	47757	-	59	748.2203389830509	93.97512613499639	705.8644067796611	67.87337603066929	012310	0.1016795155876073	DioneAgraulisEueidesHeliconius	0.105481262057	1	1	1
OG_1003.Eueides	OG_1003	Nymphalidae	-	47757	-	59	748.2203389830509	93.97512613499639	705.8644067796611	67.87337603066929	012310	0.1016795155876073	Eueides	0.0948173772049	1	1	1
OG_10030.Heliconius	OG_10030	Nymphalidae	FBgn0031217	33166	CG11377	63	933.1428571428571	128.8370272547327	860.3809523809524	114.73218346611597	012345	0.2228235276489044	Heliconius	0.271314798635	1	1	1
OG_10030.EueidesHeliconius	OG_10030	Nymphalidae	FBgn0031217	33166	CG11377	63	933.1428571428571	128.8370272547327	860.3809523809524	114.73218346611597	012345	0.2228235276489044	EueidesHeliconius	249.755271998	0.0097561947875	0.0251904234824	0.10076169393
OG_10030.Heliconiini	OG_10030	Nymphalidae	FBgn0031217	33166	CG11377	63	933.1428571428571	128.8370272547327	860.3809523809524	114.73218346611597	012345	0.2228235276489044	Heliconiini	100000	0.0444090357617	0.0113402399078	0.056701199539
OG_10030.DioneAgraulisEueidesHeliconius	OG_10030	Nymphalidae	FBgn0031217	33166	CG11377	63	933.1428571428571	128.8370272547327	860.3809523809524	114.73218346611597	012345	0.2228235276489044	DioneAgraulisEueidesHeliconius	10000000000	1	0.343595840156	1
OG_10030.Eueides	OG_10030	Nymphalidae	FBgn0031217	33166	CG11377	63	933.1428571428571	128.8370272547327	860.3809523809524	114.73218346611597	012345	0.2228235276489044	Eueides	0.168890810124	1	1	1
OG_10032.Heliconius	OG_10032	Nymphalidae	FBgn0023528	31214	CG2924	62	1025.032258064516	232.65043469950555	985.1129032258065	228.9766226156603	012345	0.0158227031441531	Heliconius	0	1	1	1
OG_10032.EueidesHeliconius	OG_10032	Nymphalidae	FBgn0023528	31214	CG2924	62	1025.032258064516	232.65043469950555	985.1129032258065	228.9766226156603	012345	0.0158227031441531	EueidesHeliconius	3846.11704993	0.00275632349194	0.0337619073732	0.168809536866
OG_10032.Heliconiini	OG_10032	Nymphalidae	FBgn0023528	31214	CG2924	62	1025.032258064516	232.65043469950555	985.1129032258065	228.9766226156603	012345	0.0158227031441531	Heliconiini	0	1	1	1
OG_10032.DioneAgraulisEueidesHeliconius	OG_10032	Nymphalidae	FBgn0023528	31214	CG2924	62	1025.032258064516	232.65043469950555	985.1129032258065	228.9766226156603	012345	0.0158227031441531	DioneAgraulisEueidesHeliconius	0.0176518700984	1	1	1
OG_10032.Eueides	OG_10032	Nymphalidae	FBgn0023528	31214	CG2924	62	1025.032258064516	232.65043469950555	985.1129032258065	228.9766226156603	012345	0.0158227031441531	Eueides	0	1	1	1
OG_10034.Heliconius	OG_10034	Nymphalidae	sp|Q9FN03|UVR8_ARATH	-	-	62	1102.983870967742	81.37537313436752	1076.225806451613	86.36520718116994	012345	0.1137966094341889	Heliconius	0.133626011261	1	1	1
OG_10034.EueidesHeliconius	OG_10034	Nymphalidae	sp|Q9FN03|UVR8_ARATH	-	-	62	1102.983870967742	81.37537313436752	1076.225806451613	86.36520718116994	012345	0.1137966094341889	EueidesHeliconius	0.101317483981	1	1	1
OG_10034.Heliconiini	OG_10034	Nymphalidae	sp|Q9FN03|UVR8_ARATH	-	-	62	1102.983870967742	81.37537313436752	1076.225806451613	86.36520718116994	012345	0.1137966094341889	Heliconiini	0.103121939565	1	1	1
OG_10034.DioneAgraulisEueidesHeliconius	OG_10034	Nymphalidae	sp|Q9FN03|UVR8_ARATH	-	-	62	1102.983870967742	81.37537313436752	1076.225806451613	86.36520718116994	012345	0.1137966094341889	DioneAgraulisEueidesHeliconius	0.0816708702995	1	1	1
OG_10034.Eueides	OG_10034	Nymphalidae	sp|Q9FN03|UVR8_ARATH	-	-	62	1102.983870967742	81.37537313436752	1076.225806451613	86.36520718116994	012345	0.1137966094341889	Eueides	0.0937808813508	1	1	1
OG_10035.Heliconius	OG_10035	Nymphalidae	sp|Q5R5M4|MOT9_PONAB	-	-	63	1613.0	221.06753977655143	1530.142857142857	220.34546160286487	012345	0.05255622830183637	Heliconius	0.0818235163606	1	1	1
OG_10035.EueidesHeliconius	OG_10035	Nymphalidae	sp|Q5R5M4|MOT9_PONAB	-	-	63	1613.0	221.06753977655143	1530.142857142857	220.34546160286487	012345	0.05255622830183637	EueidesHeliconius	144.953946966	0.00246053974152	0.00261799055015	0.0104719622006
OG_10035.Heliconiini	OG_10035	Nymphalidae	sp|Q5R5M4|MOT9_PONAB	-	-	63	1613.0	221.06753977655143	1530.142857142857	220.34546160286487	012345	0.05255622830183637	Heliconiini	0.0486290197139	1	1	1
OG_10035.Eueides	OG_10035	Nymphalidae	sp|Q5R5M4|MOT9_PONAB	-	-	63	1613.0	221.06753977655143	1530.142857142857	220.34546160286487	012345	0.05255622830183637	Eueides	0.0606027925136	1	1	1
OG_10039.Heliconius	OG_10039	Nymphalidae	FBgn0038976	42647	Pfdn5	57	450.2631578947368	37.71059059016817	437.5263157894737	11.080416204669302	012345	0.1014440497388779	Heliconius	1557.69953571	0.00755258047957	0.0425242002438	0.212621001219
OG_10039.EueidesHeliconius	OG_10039	Nymphalidae	FBgn0038976	42647	Pfdn5	57	450.2631578947368	37.71059059016817	437.5263157894737	11.080416204669302	012345	0.1014440497388779	EueidesHeliconius	0.0801329846232	1	1	1
OG_10039.Heliconiini	OG_10039	Nymphalidae	FBgn0038976	42647	Pfdn5	57	450.2631578947368	37.71059059016817	437.5263157894737	11.080416204669302	012345	0.1014440497388779	Heliconiini	1.01703937628	0.124899199348	0.5	1
OG_10039.DioneAgraulisEueidesHeliconius	OG_10039	Nymphalidae	FBgn0038976	42647	Pfdn5	57	450.2631578947368	37.71059059016817	437.5263157894737	11.080416204669302	012345	0.1014440497388779	DioneAgraulisEueidesHeliconius	0.0272226981103	1	1	1
OG_10039.Eueides	OG_10039	Nymphalidae	FBgn0038976	42647	Pfdn5	57	450.2631578947368	37.71059059016817	437.5263157894737	11.080416204669302	012345	0.1014440497388779	Eueides	0.026115116421	1	1	1
OG_1004.DioneAgraulisEueidesHeliconius	OG_1004	Nymphalidae	FBgn0040339	31038	MED22	51	412.52941176470586	26.02061998415606	407.5882352941176	26.106250825806658	012345	0.0009357536219713889	DioneAgraulisEueidesHeliconius	0	1	1	1
OG_1004.Heliconiini	OG_1004	Nymphalidae	FBgn0040339	31038	MED22	51	412.52941176470586	26.02061998415606	407.5882352941176	26.106250825806658	012345	0.0009357536219713889	Heliconiini	0	1	1	1
OG_1004.Eueides	OG_1004	Nymphalidae	FBgn0040339	31038	MED22	51	412.52941176470586	26.02061998415606	407.5882352941176	26.106250825806658	012345	0.0009357536219713889	Eueides	0	1	1	1
OG_10041.Heliconius	OG_10041	Nymphalidae	sp|Q9C086|IN80B_HUMAN	-	-	63	932.952380952381	62.279306500157745	920.0	95.26804291051643	010020	0.07305987518044091	Heliconius	0.158715948131	1	1	1
OG_10041.EueidesHeliconius	OG_10041	Nymphalidae	sp|Q9C086|IN80B_HUMAN	-	-	63	932.952380952381	62.279306500157745	920.0	95.26804291051643	010020	0.07305987518044091	EueidesHeliconius	0.0420846639014	1	1	1
OG_10041.Heliconiini	OG_10041	Nymphalidae	sp|Q9C086|IN80B_HUMAN	-	-	63	932.952380952381	62.279306500157745	920.0	95.26804291051643	010020	0.07305987518044091	Heliconiini	0.0557822278302	1	1	1
OG_10041.DioneAgraulisEueidesHeliconius	OG_10041	Nymphalidae	sp|Q9C086|IN80B_HUMAN	-	-	63	932.952380952381	62.279306500157745	920.0	95.26804291051643	010020	0.07305987518044091	DioneAgraulisEueidesHeliconius	0.0316400268317	1	1	1
OG_10041.Eueides	OG_10041	Nymphalidae	sp|Q9C086|IN80B_HUMAN	-	-	63	932.952380952381	62.279306500157745	920.0	95.26804291051643	010020	0.07305987518044091	Eueides	0.048493128163	1	1	1
OG_10042.Heliconius	OG_10042	Nymphalidae	FBgn0050105	246459	CG30105	58	415.44827586206895	101.12337504151041	382.44827586206895	35.49753386955849	012345	0.09594997197152577	Heliconius	0.78934093212	1	1	1
OG_10042.Heliconiini	OG_10042	Nymphalidae	FBgn0050105	246459	CG30105	58	415.44827586206895	101.12337504151041	382.44827586206895	35.49753386955849	012345	0.09594997197152577	Heliconiini	0.0289342589404	1	1	1
OG_10042.Eueides	OG_10042	Nymphalidae	FBgn0050105	246459	CG30105	58	415.44827586206895	101.12337504151041	382.44827586206895	35.49753386955849	012345	0.09594997197152577	Eueides	0.117778854118	1	1	1
OG_10043.Heliconius	OG_10043	Nymphalidae	sp|P53361|TBP_SPOFR	-	-	61	941.360655737705	122.58018891453915	833.7540983606557	111.28513896893236	012230	0.06330475667526107	Heliconius	0.0784557973405	1	1	1
OG_10043.EueidesHeliconius	OG_10043	Nymphalidae	sp|P53361|TBP_SPOFR	-	-	61	941.360655737705	122.58018891453915	833.7540983606557	111.28513896893236	012230	0.06330475667526107	EueidesHeliconius	0	1	1	1
OG_10043.Heliconiini	OG_10043	Nymphalidae	sp|P53361|TBP_SPOFR	-	-	61	941.360655737705	122.58018891453915	833.7540983606557	111.28513896893236	012230	0.06330475667526107	Heliconiini	0.0330072958607	1	1	1
OG_10043.DioneAgraulisEueidesHeliconius	OG_10043	Nymphalidae	sp|P53361|TBP_SPOFR	-	-	61	941.360655737705	122.58018891453915	833.7540983606557	111.28513896893236	012230	0.06330475667526107	DioneAgraulisEueidesHeliconius	0.088271683702	1	1	1
OG_10043.Eueides	OG_10043	Nymphalidae	sp|P53361|TBP_SPOFR	-	-	61	941.360655737705	122.58018891453915	833.7540983606557	111.28513896893236	012230	0.06330475667526107	Eueides	0.0814950849634	1	1	1
OG_10044.Heliconius	OG_10044	Nymphalidae	sp|Q46M54|TFDS_CUPNJ	-	-	62	912.483870967742	81.58070255996145	888.0483870967741	77.15326753253507	012345	0.1066101533365794	Heliconius	0.212413116068	1	1	1
OG_10044.EueidesHeliconius	OG_10044	Nymphalidae	sp|Q46M54|TFDS_CUPNJ	-	-	62	912.483870967742	81.58070255996145	888.0483870967741	77.15326753253507	012345	0.1066101533365794	EueidesHeliconius	0.149481273952	1	1	1
OG_10044.Heliconiini	OG_10044	Nymphalidae	sp|Q46M54|TFDS_CUPNJ	-	-	62	912.483870967742	81.58070255996145	888.0483870967741	77.15326753253507	012345	0.1066101533365794	Heliconiini	0.0761086533751	1	1	1
OG_10044.Eueides	OG_10044	Nymphalidae	sp|Q46M54|TFDS_CUPNJ	-	-	62	912.483870967742	81.58070255996145	888.0483870967741	77.15326753253507	012345	0.1066101533365794	Eueides	0.182049141936	1	1	1
OG_10045.Heliconius	OG_10045	Nymphalidae	sp|Q54PQ4|GEFA_DICDI	-	-	63	1543.857142857143	268.0807067025198	1493.904761904762	292.6728882235828	012230	0.05500475213270273	Heliconius	3.90627672122	0.046209136244	0.221196672277	1
OG_10045.EueidesHeliconius	OG_10045	Nymphalidae	sp|Q54PQ4|GEFA_DICDI	-	-	63	1543.857142857143	268.0807067025198	1493.904761904762	292.6728882235828	012230	0.05500475213270273	EueidesHeliconius	0.0235826169731	1	1	1
OG_10045.Heliconiini	OG_10045	Nymphalidae	sp|Q54PQ4|GEFA_DICDI	-	-	63	1543.857142857143	268.0807067025198	1493.904761904762	292.6728882235828	012230	0.05500475213270273	Heliconiini	0.0568568719707	1	1	1
OG_10045.DioneAgraulisEueidesHeliconius	OG_10045	Nymphalidae	sp|Q54PQ4|GEFA_DICDI	-	-	63	1543.857142857143	268.0807067025198	1493.904761904762	292.6728882235828	012230	0.05500475213270273	DioneAgraulisEueidesHeliconius	0.0133696667975	1	1	1
OG_10045.Eueides	OG_10045	Nymphalidae	sp|Q54PQ4|GEFA_DICDI	-	-	63	1543.857142857143	268.0807067025198	1493.904761904762	292.6728882235828	012230	0.05500475213270273	Eueides	0.036745089303	1	1	1
OG_10050.Heliconius	OG_10050	Nymphalidae	FBgn0004914	44544	Hnf4	61	1310.1147540983607	323.9414083006752	1182.8852459016393	298.2714188294167	012230	0.04229198043509796	Heliconius	0.0376097657988	1	1	1
OG_10050.EueidesHeliconius	OG_10050	Nymphalidae	FBgn0004914	44544	Hnf4	61	1310.1147540983607	323.9414083006752	1182.8852459016393	298.2714188294167	012230	0.04229198043509796	EueidesHeliconius	0	1	1	1
OG_10050.Heliconiini	OG_10050	Nymphalidae	FBgn0004914	44544	Hnf4	61	1310.1147540983607	323.9414083006752	1182.8852459016393	298.2714188294167	012230	0.04229198043509796	Heliconiini	0.0364261328474	1	1	1
OG_10050.DioneAgraulisEueidesHeliconius	OG_10050	Nymphalidae	FBgn0004914	44544	Hnf4	61	1310.1147540983607	323.9414083006752	1182.8852459016393	298.2714188294167	012230	0.04229198043509796	DioneAgraulisEueidesHeliconius	0	1	1	1
OG_10050.Eueides	OG_10050	Nymphalidae	FBgn0004914	44544	Hnf4	61	1310.1147540983607	323.9414083006752	1182.8852459016393	298.2714188294167	012230	0.04229198043509796	Eueides	3.19556873966	0.017266565939	0.5	1
OG_10055.Heliconius	OG_10055	Heliconiinae	sp|Q3Z3V3|GSIB_SHISS	-	-	57	755.6842105263158	71.6563822636447	711.0	65.07485568255426	012345	0.2048555969641817	Heliconius	0.178147706741	1	1	1
OG_10055.EueidesHeliconius	OG_10055	Heliconiinae	sp|Q3Z3V3|GSIB_SHISS	-	-	57	755.6842105263158	71.6563822636447	711.0	65.07485568255426	012345	0.2048555969641817	EueidesHeliconius	0.0928478072644	1	1	1
OG_10055.Eueides	OG_10055	Heliconiinae	sp|Q3Z3V3|GSIB_SHISS	-	-	57	755.6842105263158	71.6563822636447	711.0	65.07485568255426	012345	0.2048555969641817	Eueides	0.233820307023	1	1	1
OG_10058.Heliconius	OG_10058	Nymphalidae	sp|O74888|BXI1_SCHPO	-	-	61	719.2622950819672	105.15607473536178	688.2786885245902	107.31539714250609	012345	0.04065725595661883	Heliconius	0.0353585369232	1	1	1
OG_10058.EueidesHeliconius	OG_10058	Nymphalidae	sp|O74888|BXI1_SCHPO	-	-	61	719.2622950819672	105.15607473536178	688.2786885245902	107.31539714250609	012345	0.04065725595661883	EueidesHeliconius	0.0728860875607	1	1	1
OG_10058.Heliconiini	OG_10058	Nymphalidae	sp|O74888|BXI1_SCHPO	-	-	61	719.2622950819672	105.15607473536178	688.2786885245902	107.31539714250609	012345	0.04065725595661883	Heliconiini	0.475695485817	0.118506663388	1	1
OG_10058.DioneAgraulisEueidesHeliconius	OG_10058	Nymphalidae	sp|O74888|BXI1_SCHPO	-	-	61	719.2622950819672	105.15607473536178	688.2786885245902	107.31539714250609	012345	0.04065725595661883	DioneAgraulisEueidesHeliconius	19.2940501307	0.00488112796837	0.0418338514005	0.209169257002
OG_10058.Eueides	OG_10058	Nymphalidae	sp|O74888|BXI1_SCHPO	-	-	61	719.2622950819672	105.15607473536178	688.2786885245902	107.31539714250609	012345	0.04065725595661883	Eueides	0.0200746377229	1	1	1
OG_10060.Heliconius	OG_10060	Nymphalidae	sp|P83373|MDHM_FRAAN	-	-	61	966.7868852459017	154.47161283635748	944.1147540983607	177.26308117104082	012345	0.04223413393399741	Heliconius	0.0109298616326	1	1	1
OG_10060.Heliconiini	OG_10060	Nymphalidae	sp|P83373|MDHM_FRAAN	-	-	61	966.7868852459017	154.47161283635748	944.1147540983607	177.26308117104082	012345	0.04223413393399741	Heliconiini	1.25929444275	0.0575812641468	0.460522161843	1
OG_10060.DioneAgraulisEueidesHeliconius	OG_10060	Nymphalidae	sp|P83373|MDHM_FRAAN	-	-	61	966.7868852459017	154.47161283635748	944.1147540983607	177.26308117104082	012345	0.04223413393399741	DioneAgraulisEueidesHeliconius	0.0537349955329	1	1	1
OG_10060.Eueides	OG_10060	Nymphalidae	sp|P83373|MDHM_FRAAN	-	-	61	966.7868852459017	154.47161283635748	944.1147540983607	177.26308117104082	012345	0.04223413393399741	Eueides	0.0159228143668	1	1	1
OG_10061.Heliconius	OG_10061	Nymphalidae	sp|Q9Y2X8|UB2D4_HUMAN	-	-	61	467.26229508196724	44.59210458650624	451.327868852459	26.358637064864084	012345	0.02491270271955644	Heliconius	0	1	1	1
OG_10061.Heliconiini	OG_10061	Nymphalidae	sp|Q9Y2X8|UB2D4_HUMAN	-	-	61	467.26229508196724	44.59210458650624	451.327868852459	26.358637064864084	012345	0.02491270271955644	Heliconiini	0	1	1	1
OG_10061.Eueides	OG_10061	Nymphalidae	sp|Q9Y2X8|UB2D4_HUMAN	-	-	61	467.26229508196724	44.59210458650624	451.327868852459	26.358637064864084	012345	0.02491270271955644	Eueides	0	1	1	1
OG_10063.Heliconius	OG_10063	Nymphalidae	sp|Q8R3R5|T185B_MOUSE	-	-	49	408.42857142857144	3.428571428571428	404.9387755102041	0.4241757079760516	012345	0.02326713630651742	Heliconius	0	1	1	1
OG_10063.EueidesHeliconius	OG_10063	Nymphalidae	sp|Q8R3R5|T185B_MOUSE	-	-	49	408.42857142857144	3.428571428571428	404.9387755102041	0.4241757079760516	012345	0.02326713630651742	EueidesHeliconius	0	1	1	1
OG_10063.DioneAgraulisEueidesHeliconius	OG_10063	Nymphalidae	sp|Q8R3R5|T185B_MOUSE	-	-	49	408.42857142857144	3.428571428571428	404.9387755102041	0.4241757079760516	012345	0.02326713630651742	DioneAgraulisEueidesHeliconius	0	1	1	1
OG_10063.Heliconiini	OG_10063	Nymphalidae	sp|Q8R3R5|T185B_MOUSE	-	-	49	408.42857142857144	3.428571428571428	404.9387755102041	0.4241757079760516	012345	0.02326713630651742	Heliconiini	0.0532404000244	1	1	1
OG_10063.Eueides	OG_10063	Nymphalidae	sp|Q8R3R5|T185B_MOUSE	-	-	49	408.42857142857144	3.428571428571428	404.9387755102041	0.4241757079760516	012345	0.02326713630651742	Eueides	7.12981732297	0.0201383556177	0.227884497736	1
OG_10072.Heliconius	OG_10072	Nymphalidae	sp|Q8YRI1|YY46_NOSS1	-	-	61	996.688524590164	106.20696482110618	983.8524590163935	102.32699691299422	012345	0.05304731010183827	Heliconius	0.0214885381772	1	1	1
OG_10072.EueidesHeliconius	OG_10072	Nymphalidae	sp|Q8YRI1|YY46_NOSS1	-	-	61	996.688524590164	106.20696482110618	983.8524590163935	102.32699691299422	012345	0.05304731010183827	EueidesHeliconius	0.0159965554625	1	1	1
OG_10072.Heliconiini	OG_10072	Nymphalidae	sp|Q8YRI1|YY46_NOSS1	-	-	61	996.688524590164	106.20696482110618	983.8524590163935	102.32699691299422	012345	0.05304731010183827	Heliconiini	0.0373068020274	1	1	1
OG_10072.DioneAgraulisEueidesHeliconius	OG_10072	Nymphalidae	sp|Q8YRI1|YY46_NOSS1	-	-	61	996.688524590164	106.20696482110618	983.8524590163935	102.32699691299422	012345	0.05304731010183827	DioneAgraulisEueidesHeliconius	0.00810363827575	1	1	1
OG_10072.Eueides	OG_10072	Nymphalidae	sp|Q8YRI1|YY46_NOSS1	-	-	61	996.688524590164	106.20696482110618	983.8524590163935	102.32699691299422	012345	0.05304731010183827	Eueides	0	1	1	1
OG_10077.Heliconius	OG_10077	Nymphalidae	sp|P77775|YFCH_ECOLI	-	-	61	866.4590163934427	115.2504861154702	845.8524590163935	130.39119401846042	012345	0.07795698904335201	Heliconius	0.0795613631984	1	1	1
OG_10077.EueidesHeliconius	OG_10077	Nymphalidae	sp|P77775|YFCH_ECOLI	-	-	61	866.4590163934427	115.2504861154702	845.8524590163935	130.39119401846042	012345	0.07795698904335201	EueidesHeliconius	0.0259580828158	1	1	1
OG_10077.Heliconiini	OG_10077	Nymphalidae	sp|P77775|YFCH_ECOLI	-	-	61	866.4590163934427	115.2504861154702	845.8524590163935	130.39119401846042	012345	0.07795698904335201	Heliconiini	0.0421335493096	1	1	1
OG_10077.DioneAgraulisEueidesHeliconius	OG_10077	Nymphalidae	sp|P77775|YFCH_ECOLI	-	-	61	866.4590163934427	115.2504861154702	845.8524590163935	130.39119401846042	012345	0.07795698904335201	DioneAgraulisEueidesHeliconius	0.0203927674192	1	1	1
OG_10077.Eueides	OG_10077	Nymphalidae	sp|P77775|YFCH_ECOLI	-	-	61	866.4590163934427	115.2504861154702	845.8524590163935	130.39119401846042	012345	0.07795698904335201	Eueides	0.152943741273	1	1	1
OG_1008.Heliconius	OG_1008	Nymphalidae	FBgn0000299	33727	Col4a1	61	1878.9344262295083	461.7880739129989	1818.5901639344263	475.8114855058854	012345	0.1475992992368816	Heliconius	2.14937592951	0.0404493926613	0.307124228758	1
OG_1008.EueidesHeliconius	OG_1008	Nymphalidae	FBgn0000299	33727	Col4a1	61	1878.9344262295083	461.7880739129989	1818.5901639344263	475.8114855058854	012345	0.1475992992368816	EueidesHeliconius	0.061996851033	1	1	1
OG_1008.Heliconiini	OG_1008	Nymphalidae	FBgn0000299	33727	Col4a1	61	1878.9344262295083	461.7880739129989	1818.5901639344263	475.8114855058854	012345	0.1475992992368816	Heliconiini	39.2645116236	0.0261629297727	0.132526013087	0.662630065435
OG_1008.DioneAgraulisEueidesHeliconius	OG_1008	Nymphalidae	FBgn0000299	33727	Col4a1	61	1878.9344262295083	461.7880739129989	1818.5901639344263	475.8114855058854	012345	0.1475992992368816	DioneAgraulisEueidesHeliconius	0.0235206526137	1	1	1
OG_1008.Eueides	OG_1008	Nymphalidae	FBgn0000299	33727	Col4a1	61	1878.9344262295083	461.7880739129989	1818.5901639344263	475.8114855058854	012345	0.1475992992368816	Eueides	0.0962861447892	1	1	1
OG_10081.Heliconius	OG_10081	Nymphalidae	FBgn0010452	39491	trn	63	1733.904761904762	209.0638783133507	1550.7619047619048	154.0234690719025	012230	0.06027443756657922	Heliconius	5.63845745019	0.0161716977535	0.183999869709	0.919999348547
OG_10081.EueidesHeliconius	OG_10081	Nymphalidae	FBgn0010452	39491	trn	63	1733.904761904762	209.0638783133507	1550.7619047619048	154.0234690719025	012230	0.06027443756657922	EueidesHeliconius	0.0161952791256	1	1	1
OG_10081.Heliconiini	OG_10081	Nymphalidae	FBgn0010452	39491	trn	63	1733.904761904762	209.0638783133507	1550.7619047619048	154.0234690719025	012230	0.06027443756657922	Heliconiini	0.048601277158	1	1	1
OG_10081.DioneAgraulisEueidesHeliconius	OG_10081	Nymphalidae	FBgn0010452	39491	trn	63	1733.904761904762	209.0638783133507	1550.7619047619048	154.0234690719025	012230	0.06027443756657922	DioneAgraulisEueidesHeliconius	0.0265026966054	1	1	1
OG_10081.Eueides	OG_10081	Nymphalidae	FBgn0010452	39491	trn	63	1733.904761904762	209.0638783133507	1550.7619047619048	154.0234690719025	012230	0.06027443756657922	Eueides	0	1	1	1
OG_10082.EueidesHeliconius	OG_10082	Nymphalidae	-	47757	-	59	487.0169491525424	336.1958918232463	397.1694915254237	16.06570464819855	010020	0.03942400205733176	EueidesHeliconius	0.0134279764647	1	1	1
OG_10082.Heliconiini	OG_10082	Nymphalidae	-	47757	-	59	487.0169491525424	336.1958918232463	397.1694915254237	16.06570464819855	010020	0.03942400205733176	Heliconiini	0.11467389808	1	1	1
OG_10082.DioneAgraulisEueidesHeliconius	OG_10082	Nymphalidae	-	47757	-	59	487.0169491525424	336.1958918232463	397.1694915254237	16.06570464819855	010020	0.03942400205733176	DioneAgraulisEueidesHeliconius	0	1	1	1
OG_10082.Heliconius	OG_10082	Nymphalidae	-	47757	-	59	487.0169491525424	336.1958918232463	397.1694915254237	16.06570464819855	010020	0.03942400205733176	Heliconius	0.00898773434484	1	1	1
OG_10083.Heliconius	OG_10083	Nymphalidae	sp|P21133|AAAA_EMENI	-	-	62	1106.0806451612902	228.76310456996114	1011.483870967742	242.73473786349732	012345	0.06275659013306008	Heliconius	0.0344921506572	1	1	1
OG_10083.EueidesHeliconius	OG_10083	Nymphalidae	sp|P21133|AAAA_EMENI	-	-	62	1106.0806451612902	228.76310456996114	1011.483870967742	242.73473786349732	012345	0.06275659013306008	EueidesHeliconius	9.34735632627	0.010421419022	0.068222256063	0.272889024252
OG_10083.Heliconiini	OG_10083	Nymphalidae	sp|P21133|AAAA_EMENI	-	-	62	1106.0806451612902	228.76310456996114	1011.483870967742	242.73473786349732	012345	0.06275659013306008	Heliconiini	0.627280895246	0.0877888634689	1	1
OG_10083.Eueides	OG_10083	Nymphalidae	sp|P21133|AAAA_EMENI	-	-	62	1106.0806451612902	228.76310456996114	1011.483870967742	242.73473786349732	012345	0.06275659013306008	Eueides	0.0355630445912	1	1	1
OG_10086.Heliconius	OG_10086	Nymphalidae	sp|Q9VMV6|SELT_DROME	-	-	61	587.9016393442623	51.759438805973076	563.2622950819672	53.386282280340566	012345	0.04504684017922751	Heliconius	0.0205454843684	1	1	1
OG_10086.EueidesHeliconius	OG_10086	Nymphalidae	sp|Q9VMV6|SELT_DROME	-	-	61	587.9016393442623	51.759438805973076	563.2622950819672	53.386282280340566	012345	0.04504684017922751	EueidesHeliconius	0	1	1	1
OG_10086.Heliconiini	OG_10086	Nymphalidae	sp|Q9VMV6|SELT_DROME	-	-	61	587.9016393442623	51.759438805973076	563.2622950819672	53.386282280340566	012345	0.04504684017922751	Heliconiini	0.102501678402	1	1	1
OG_10086.DioneAgraulisEueidesHeliconius	OG_10086	Nymphalidae	sp|Q9VMV6|SELT_DROME	-	-	61	587.9016393442623	51.759438805973076	563.2622950819672	53.386282280340566	012345	0.04504684017922751	DioneAgraulisEueidesHeliconius	0	1	1	1
OG_10086.Eueides	OG_10086	Nymphalidae	sp|Q9VMV6|SELT_DROME	-	-	61	587.9016393442623	51.759438805973076	563.2622950819672	53.386282280340566	012345	0.04504684017922751	Eueides	0.169647613739	1	1	1
OG_10093.Heliconius	OG_10093	Nymphalidae	-	47757	-	63	1731.0	320.2940613159815	1684.3333333333333	314.99967246140693	012345	0.04016028236776339	Heliconius	0.0415434880626	1	1	1
OG_10093.EueidesHeliconius	OG_10093	Nymphalidae	-	47757	-	63	1731.0	320.2940613159815	1684.3333333333333	314.99967246140693	012345	0.04016028236776339	EueidesHeliconius	0	1	1	1
OG_10093.Heliconiini	OG_10093	Nymphalidae	-	47757	-	63	1731.0	320.2940613159815	1684.3333333333333	314.99967246140693	012345	0.04016028236776339	Heliconiini	0.0143381535565	1	1	1
OG_10093.DioneAgraulisEueidesHeliconius	OG_10093	Nymphalidae	-	47757	-	63	1731.0	320.2940613159815	1684.3333333333333	314.99967246140693	012345	0.04016028236776339	DioneAgraulisEueidesHeliconius	0	1	1	1
OG_10093.Eueides	OG_10093	Nymphalidae	-	47757	-	63	1731.0	320.2940613159815	1684.3333333333333	314.99967246140693	012345	0.04016028236776339	Eueides	0.0730720339567	1	1	1
OG_10094.Heliconius	OG_10094	Nymphalidae	sp|P60825|CIRBP_RAT	-	-	62	1856.5645161290322	363.7856787054948	1672.741935483871	337.45216795980144	012345	0.09188121475682877	Heliconius	0.0666629949859	1	1	1
OG_10094.EueidesHeliconius	OG_10094	Nymphalidae	sp|P60825|CIRBP_RAT	-	-	62	1856.5645161290322	363.7856787054948	1672.741935483871	337.45216795980144	012345	0.09188121475682877	EueidesHeliconius	0.0171318578408	1	1	1
OG_10094.Heliconiini	OG_10094	Nymphalidae	sp|P60825|CIRBP_RAT	-	-	62	1856.5645161290322	363.7856787054948	1672.741935483871	337.45216795980144	012345	0.09188121475682877	Heliconiini	0.0975026821229	1	1	1
OG_10094.Eueides	OG_10094	Nymphalidae	sp|P60825|CIRBP_RAT	-	-	62	1856.5645161290322	363.7856787054948	1672.741935483871	337.45216795980144	012345	0.09188121475682877	Eueides	0.0155388566197	1	1	1
OG_10095.Heliconius	OG_10095	Heliconiinae	sp|Q9PTX2|CIRBP_LITCT	-	-	39	645.2307692307693	606.6612479979954	352.15384615384613	9.330233353880804	012345	0.1601998096722429	Heliconius	0	1	1	1
OG_10095.DioneAgraulisEueidesHeliconius	OG_10095	Heliconiinae	sp|Q9PTX2|CIRBP_LITCT	-	-	39	645.2307692307693	606.6612479979954	352.15384615384613	9.330233353880804	012345	0.1601998096722429	DioneAgraulisEueidesHeliconius	0.203520985443	1	1	1
OG_10095.Eueides	OG_10095	Heliconiinae	sp|Q9PTX2|CIRBP_LITCT	-	-	39	645.2307692307693	606.6612479979954	352.15384615384613	9.330233353880804	012345	0.1601998096722429	Eueides	0.142047595361	1	1	1
OG_10096.Heliconius	OG_10096	Nymphalidae	sp|Q8IY51|TIGD4_HUMAN	-	-	61	709.0819672131148	172.95562731255927	589.9672131147541	75.74849827286299	012345	0.06928853236275692	Heliconius	0.0525077278644	1	1	1
OG_10096.EueidesHeliconius	OG_10096	Nymphalidae	sp|Q8IY51|TIGD4_HUMAN	-	-	61	709.0819672131148	172.95562731255927	589.9672131147541	75.74849827286299	012345	0.06928853236275692	EueidesHeliconius	0	1	1	1
OG_10096.Heliconiini	OG_10096	Nymphalidae	sp|Q8IY51|TIGD4_HUMAN	-	-	61	709.0819672131148	172.95562731255927	589.9672131147541	75.74849827286299	012345	0.06928853236275692	Heliconiini	0	1	1	1
OG_10096.DioneAgraulisEueidesHeliconius	OG_10096	Nymphalidae	sp|Q8IY51|TIGD4_HUMAN	-	-	61	709.0819672131148	172.95562731255927	589.9672131147541	75.74849827286299	012345	0.06928853236275692	DioneAgraulisEueidesHeliconius	543.293474237	0.0143714692536	0.000418521593296	0.00209260796648
OG_10096.Eueides	OG_10096	Nymphalidae	sp|Q8IY51|TIGD4_HUMAN	-	-	61	709.0819672131148	172.95562731255927	589.9672131147541	75.74849827286299	012345	0.06928853236275692	Eueides	0.0329684052625	1	1	1
OG_10097.Heliconius	OG_10097	Nymphalidae	sp|Q0SRN4|QUEA_CLOPS	-	-	63	1172.047619047619	149.50759693724635	1128.1904761904761	137.98848090213184	012345	0.05249519337451262	Heliconius	0.0499363011919	1	1	1
OG_10097.EueidesHeliconius	OG_10097	Nymphalidae	sp|Q0SRN4|QUEA_CLOPS	-	-	63	1172.047619047619	149.50759693724635	1128.1904761904761	137.98848090213184	012345	0.05249519337451262	EueidesHeliconius	0.0713055682826	1	1	1
OG_10097.Heliconiini	OG_10097	Nymphalidae	sp|Q0SRN4|QUEA_CLOPS	-	-	63	1172.047619047619	149.50759693724635	1128.1904761904761	137.98848090213184	012345	0.05249519337451262	Heliconiini	0.0301739277159	1	1	1
OG_10097.Eueides	OG_10097	Nymphalidae	sp|Q0SRN4|QUEA_CLOPS	-	-	63	1172.047619047619	149.50759693724635	1128.1904761904761	137.98848090213184	012345	0.05249519337451262	Eueides	0.0385720673109	1	1	1
OG_10099.Heliconius	OG_10099	Nymphalidae	sp|P50613|CDK7_HUMAN	-	-	62	962.7096774193549	118.73491579534725	943.1612903225806	143.69560048357454	012345	0.027524936371596	Heliconius	0.0213320496776	1	1	1
OG_10099.EueidesHeliconius	OG_10099	Nymphalidae	sp|P50613|CDK7_HUMAN	-	-	62	962.7096774193549	118.73491579534725	943.1612903225806	143.69560048357454	012345	0.027524936371596	EueidesHeliconius	0.0230968541985	1	1	1
OG_10099.Heliconiini	OG_10099	Nymphalidae	sp|P50613|CDK7_HUMAN	-	-	62	962.7096774193549	118.73491579534725	943.1612903225806	143.69560048357454	012345	0.027524936371596	Heliconiini	0.0175858173349	1	1	1
OG_10099.DioneAgraulisEueidesHeliconius	OG_10099	Nymphalidae	sp|P50613|CDK7_HUMAN	-	-	62	962.7096774193549	118.73491579534725	943.1612903225806	143.69560048357454	012345	0.027524936371596	DioneAgraulisEueidesHeliconius	0.017956514458	1	1	1
OG_10099.Eueides	OG_10099	Nymphalidae	sp|P50613|CDK7_HUMAN	-	-	62	962.7096774193549	118.73491579534725	943.1612903225806	143.69560048357454	012345	0.027524936371596	Eueides	0.0229008102485	1	1	1
OG_1010.Heliconius	OG_1010	Nymphalidae	-	47757	-	59	824.8474576271186	122.74664737861022	759.3050847457627	140.63081300826536	012345	0.03596180072379498	Heliconius	0.00710526032367	1	1	1
OG_1010.EueidesHeliconius	OG_1010	Nymphalidae	-	47757	-	59	824.8474576271186	122.74664737861022	759.3050847457627	140.63081300826536	012345	0.03596180072379498	EueidesHeliconius	0.00986631846948	1	1	1
OG_1010.Heliconiini	OG_1010	Nymphalidae	-	47757	-	59	824.8474576271186	122.74664737861022	759.3050847457627	140.63081300826536	012345	0.03596180072379498	Heliconiini	0.050521760997	1	1	1
OG_1010.DioneAgraulisEueidesHeliconius	OG_1010	Nymphalidae	-	47757	-	59	824.8474576271186	122.74664737861022	759.3050847457627	140.63081300826536	012345	0.03596180072379498	DioneAgraulisEueidesHeliconius	0.0255053325471	1	1	1
OG_1010.Eueides	OG_1010	Nymphalidae	-	47757	-	59	824.8474576271186	122.74664737861022	759.3050847457627	140.63081300826536	012345	0.03596180072379498	Eueides	0	1	1	1
OG_10100.Heliconius	OG_10100	Nymphalidae	sp|O95983|MBD3_HUMAN	-	-	62	728.9032258064516	73.37787960550935	713.7096774193549	86.14099228305213	012310	0.03658481313997991	Heliconius	0.0612527146151	1	1	1
OG_10100.EueidesHeliconius	OG_10100	Nymphalidae	sp|O95983|MBD3_HUMAN	-	-	62	728.9032258064516	73.37787960550935	713.7096774193549	86.14099228305213	012310	0.03658481313997991	EueidesHeliconius	0.125597488781	1	1	1
OG_10100.Heliconiini	OG_10100	Nymphalidae	sp|O95983|MBD3_HUMAN	-	-	62	728.9032258064516	73.37787960550935	713.7096774193549	86.14099228305213	012310	0.03658481313997991	Heliconiini	0.0376531838064	1	1	1
OG_10100.DioneAgraulisEueidesHeliconius	OG_10100	Nymphalidae	sp|O95983|MBD3_HUMAN	-	-	62	728.9032258064516	73.37787960550935	713.7096774193549	86.14099228305213	012310	0.03658481313997991	DioneAgraulisEueidesHeliconius	0	1	1	1
OG_10100.Eueides	OG_10100	Nymphalidae	sp|O95983|MBD3_HUMAN	-	-	62	728.9032258064516	73.37787960550935	713.7096774193549	86.14099228305213	012310	0.03658481313997991	Eueides	0.042360060069	1	1	1
OG_10110.Heliconius	OG_10110	Nymphalidae	FBgn0023534	30996	CG17778	53	325.188679245283	27.95080354856232	318.8490566037736	9.239775024654548	012345	0.03433050205550832	Heliconius	0.0875022246407	1	1	1
OG_10110.EueidesHeliconius	OG_10110	Nymphalidae	FBgn0023534	30996	CG17778	53	325.188679245283	27.95080354856232	318.8490566037736	9.239775024654548	012345	0.03433050205550832	EueidesHeliconius	0.0490636327696	1	1	1
OG_10110.Heliconiini	OG_10110	Nymphalidae	FBgn0023534	30996	CG17778	53	325.188679245283	27.95080354856232	318.8490566037736	9.239775024654548	012345	0.03433050205550832	Heliconiini	10000000000	1	0.5	1
OG_10110.DioneAgraulisEueidesHeliconius	OG_10110	Nymphalidae	FBgn0023534	30996	CG17778	53	325.188679245283	27.95080354856232	318.8490566037736	9.239775024654548	012345	0.03433050205550832	DioneAgraulisEueidesHeliconius	0	1	1	1
OG_10110.Eueides	OG_10110	Nymphalidae	FBgn0023534	30996	CG17778	53	325.188679245283	27.95080354856232	318.8490566037736	9.239775024654548	012345	0.03433050205550832	Eueides	0.0445442899975	1	1	1
OG_10114.Heliconius	OG_10114	Nymphalidae	sp|Q8C9B9|DIDO1_MOUSE	-	-	63	5009.142857142857	924.5322259038319	4887.857142857143	923.0235144151341	012345	0.09842463493413316	Heliconius	0.0769177676645	1	1	1
OG_10114.EueidesHeliconius	OG_10114	Nymphalidae	sp|Q8C9B9|DIDO1_MOUSE	-	-	63	5009.142857142857	924.5322259038319	4887.857142857143	923.0235144151341	012345	0.09842463493413316	EueidesHeliconius	0.0748357594373	1	1	1
OG_10114.Heliconiini	OG_10114	Nymphalidae	sp|Q8C9B9|DIDO1_MOUSE	-	-	63	5009.142857142857	924.5322259038319	4887.857142857143	923.0235144151341	012345	0.09842463493413316	Heliconiini	0.701577141442	0.198471434123	1	1
OG_10114.DioneAgraulisEueidesHeliconius	OG_10114	Nymphalidae	sp|Q8C9B9|DIDO1_MOUSE	-	-	63	5009.142857142857	924.5322259038319	4887.857142857143	923.0235144151341	012345	0.09842463493413316	DioneAgraulisEueidesHeliconius	16.4394963718	0.0148967412295	0.0117334573002	0.0586672865011
OG_10114.Eueides	OG_10114	Nymphalidae	sp|Q8C9B9|DIDO1_MOUSE	-	-	63	5009.142857142857	924.5322259038319	4887.857142857143	923.0235144151341	012345	0.09842463493413316	Eueides	1.02125711724	0.128960150275	0.495201311689	1
OG_10116.Heliconius	OG_10116	Nymphalidae	sp|Q27HV0|OGT1_PIG	-	-	62	1727.1290322580646	263.4409699363388	1579.5967741935483	208.66282878995585	012345	0.04040903549976927	Heliconius	0.0445521307183	1	1	1
OG_10116.EueidesHeliconius	OG_10116	Nymphalidae	sp|Q27HV0|OGT1_PIG	-	-	62	1727.1290322580646	263.4409699363388	1579.5967741935483	208.66282878995585	012345	0.04040903549976927	EueidesHeliconius	0.0389856779217	1	1	1
OG_10116.Heliconiini	OG_10116	Nymphalidae	sp|Q27HV0|OGT1_PIG	-	-	62	1727.1290322580646	263.4409699363388	1579.5967741935483	208.66282878995585	012345	0.04040903549976927	Heliconiini	3846.11651103	0.0102308173333	0.0375961983014	0.150384793205
OG_10116.Eueides	OG_10116	Nymphalidae	sp|Q27HV0|OGT1_PIG	-	-	62	1727.1290322580646	263.4409699363388	1579.5967741935483	208.66282878995585	012345	0.04040903549976927	Eueides	0.0910057408546	1	1	1
OG_10117.DioneAgraulisEueidesHeliconius	OG_10117	Heliconiini	sp|Q9M8Y0|SEC_ARATH	-	-	39	847.3846153846154	665.0269558980342	392.15384615384613	39.61904389372937	010010	0.3626412643070272	DioneAgraulisEueidesHeliconius	0.5508013371	1	1	1
OG_10119.Heliconius	OG_10119	Nymphalidae	sp|Q5I0H4|TMCO1_RAT	-	-	61	541.5245901639345	52.732733653799194	532.7213114754098	59.01184408694857	012345	0.006863073609837943	Heliconius	0	1	1	1
OG_10119.EueidesHeliconius	OG_10119	Nymphalidae	sp|Q5I0H4|TMCO1_RAT	-	-	61	541.5245901639345	52.732733653799194	532.7213114754098	59.01184408694857	012345	0.006863073609837943	EueidesHeliconius	0	1	1	1
OG_10119.Heliconiini	OG_10119	Nymphalidae	sp|Q5I0H4|TMCO1_RAT	-	-	61	541.5245901639345	52.732733653799194	532.7213114754098	59.01184408694857	012345	0.006863073609837943	Heliconiini	0	1	1	1
OG_10119.DioneAgraulisEueidesHeliconius	OG_10119	Nymphalidae	sp|Q5I0H4|TMCO1_RAT	-	-	61	541.5245901639345	52.732733653799194	532.7213114754098	59.01184408694857	012345	0.006863073609837943	DioneAgraulisEueidesHeliconius	0	1	1	1
OG_10119.Eueides	OG_10119	Nymphalidae	sp|Q5I0H4|TMCO1_RAT	-	-	61	541.5245901639345	52.732733653799194	532.7213114754098	59.01184408694857	012345	0.006863073609837943	Eueides	0	1	1	1
OG_10120.Heliconius	OG_10120	Nymphalidae	sp|Q5RC80|RBM39_PONAB	-	-	63	1643.2857142857142	364.698981269177	1544.7142857142858	386.47665399300973	012345	0.04590107807080286	Heliconius	0.147369549788	1	1	1
OG_10120.EueidesHeliconius	OG_10120	Nymphalidae	sp|Q5RC80|RBM39_PONAB	-	-	63	1643.2857142857142	364.698981269177	1544.7142857142858	386.47665399300973	012345	0.04590107807080286	EueidesHeliconius	0.0547675504495	1	1	1
OG_10120.Heliconiini	OG_10120	Nymphalidae	sp|Q5RC80|RBM39_PONAB	-	-	63	1643.2857142857142	364.698981269177	1544.7142857142858	386.47665399300973	012345	0.04590107807080286	Heliconiini	0.0658104039604	1	1	1
OG_10120.DioneAgraulisEueidesHeliconius	OG_10120	Nymphalidae	sp|Q5RC80|RBM39_PONAB	-	-	63	1643.2857142857142	364.698981269177	1544.7142857142858	386.47665399300973	012345	0.04590107807080286	DioneAgraulisEueidesHeliconius	0.0255225570363	1	1	1
OG_10120.Eueides	OG_10120	Nymphalidae	sp|Q5RC80|RBM39_PONAB	-	-	63	1643.2857142857142	364.698981269177	1544.7142857142858	386.47665399300973	012345	0.04590107807080286	Eueides	100000	0.00503944885131	0.0448682147678	0.224341073839
OG_10123.Heliconius	OG_10123	Nymphalidae	sp|P47135|JSN1_YEAST	-	-	61	1126.27868852459	130.4918980146291	1055.9016393442623	114.70699735942088	012345	0.1361923929298839	Heliconius	0.150526240909	1	1	1
OG_10123.EueidesHeliconius	OG_10123	Nymphalidae	sp|P47135|JSN1_YEAST	-	-	61	1126.27868852459	130.4918980146291	1055.9016393442623	114.70699735942088	012345	0.1361923929298839	EueidesHeliconius	0.00616373816532	1	1	1
OG_10123.Heliconiini	OG_10123	Nymphalidae	sp|P47135|JSN1_YEAST	-	-	61	1126.27868852459	130.4918980146291	1055.9016393442623	114.70699735942088	012345	0.1361923929298839	Heliconiini	0.0466433107086	1	1	1
OG_10123.DioneAgraulisEueidesHeliconius	OG_10123	Nymphalidae	sp|P47135|JSN1_YEAST	-	-	61	1126.27868852459	130.4918980146291	1055.9016393442623	114.70699735942088	012345	0.1361923929298839	DioneAgraulisEueidesHeliconius	0.133698974146	1	1	1
OG_10123.Eueides	OG_10123	Nymphalidae	sp|P47135|JSN1_YEAST	-	-	61	1126.27868852459	130.4918980146291	1055.9016393442623	114.70699735942088	012345	0.1361923929298839	Eueides	1.48182216283	0.0700916225318	0.430995271756	1
OG_10125.Heliconius	OG_10125	Nymphalidae	FBgn0036289	39423	CG10657	62	967.3548387096774	203.02614616096616	890.9516129032259	191.41050527506738	012345	0.07029653316555655	Heliconius	1.79360220927	0.0568573130335	0.334703095931	1
OG_10125.EueidesHeliconius	OG_10125	Nymphalidae	FBgn0036289	39423	CG10657	62	967.3548387096774	203.02614616096616	890.9516129032259	191.41050527506738	012345	0.07029653316555655	EueidesHeliconius	0	1	1	1
OG_10125.Heliconiini	OG_10125	Nymphalidae	FBgn0036289	39423	CG10657	62	967.3548387096774	203.02614616096616	890.9516129032259	191.41050527506738	012345	0.07029653316555655	Heliconiini	0.0471404331005	1	1	1
OG_10125.DioneAgraulisEueidesHeliconius	OG_10125	Nymphalidae	FBgn0036289	39423	CG10657	62	967.3548387096774	203.02614616096616	890.9516129032259	191.41050527506738	012345	0.07029653316555655	DioneAgraulisEueidesHeliconius	0.0244363464036	1	1	1
OG_10125.Eueides	OG_10125	Nymphalidae	FBgn0036289	39423	CG10657	62	967.3548387096774	203.02614616096616	890.9516129032259	191.41050527506738	012345	0.07029653316555655	Eueides	0	1	1	1
OG_10126.Heliconius	OG_10126	Nymphalidae	FBgn0034490	37287	CG9864	58	1418.2758620689656	306.07570582001824	1367.4310344827586	293.80225064681986	012345	0.05995859609657381	Heliconius	2.55775045539	0.0375400464458	0.224497689064	0.897990756256
OG_10126.EueidesHeliconius	OG_10126	Nymphalidae	FBgn0034490	37287	CG9864	58	1418.2758620689656	306.07570582001824	1367.4310344827586	293.80225064681986	012345	0.05995859609657381	EueidesHeliconius	0	1	1	1
OG_10126.Heliconiini	OG_10126	Nymphalidae	FBgn0034490	37287	CG9864	58	1418.2758620689656	306.07570582001824	1367.4310344827586	293.80225064681986	012345	0.05995859609657381	Heliconiini	0.0560590384056	1	1	1
OG_10126.DioneAgraulisEueidesHeliconius	OG_10126	Nymphalidae	FBgn0034490	37287	CG9864	58	1418.2758620689656	306.07570582001824	1367.4310344827586	293.80225064681986	012345	0.05995859609657381	DioneAgraulisEueidesHeliconius	0	1	1	1
OG_10126.Eueides	OG_10126	Nymphalidae	FBgn0034490	37287	CG9864	58	1418.2758620689656	306.07570582001824	1367.4310344827586	293.80225064681986	012345	0.05995859609657381	Eueides	123.51009858	0.00668255621868	0.0112307741614	0.0561538708068
OG_10129.Heliconius	OG_10129	Nymphalidae	sp|O95260|ATE1_HUMAN	-	-	63	1526.6190476190477	562.5738026665585	1357.047619047619	266.64109571276236	012345	0.1287954084850669	Heliconius	0.0830455391475	1	1	1
OG_10129.EueidesHeliconius	OG_10129	Nymphalidae	sp|O95260|ATE1_HUMAN	-	-	63	1526.6190476190477	562.5738026665585	1357.047619047619	266.64109571276236	012345	0.1287954084850669	EueidesHeliconius	0.15361639419	1	1	1
OG_10129.Heliconiini	OG_10129	Nymphalidae	sp|O95260|ATE1_HUMAN	-	-	63	1526.6190476190477	562.5738026665585	1357.047619047619	266.64109571276236	012345	0.1287954084850669	Heliconiini	0.0944468683984	1	1	1
OG_10129.DioneAgraulisEueidesHeliconius	OG_10129	Nymphalidae	sp|O95260|ATE1_HUMAN	-	-	63	1526.6190476190477	562.5738026665585	1357.047619047619	266.64109571276236	012345	0.1287954084850669	DioneAgraulisEueidesHeliconius	0.0749067977559	1	1	1
OG_10129.Eueides	OG_10129	Nymphalidae	sp|O95260|ATE1_HUMAN	-	-	63	1526.6190476190477	562.5738026665585	1357.047619047619	266.64109571276236	012345	0.1287954084850669	Eueides	2.14322652978	0.188053940887	0.269462117227	1
OG_10130.Heliconius	OG_10130	Heliconiinae	sp|P17036|ZNF3_HUMAN	-	-	58	768.6724137931035	70.83769402072319	741.7241379310345	65.78879296224586	012345	0.04266839638616337	Heliconius	8.67892508825	0.0115787252011	0.195344746054	0.390689492107
OG_10130.EueidesHeliconius	OG_10130	Heliconiinae	sp|P17036|ZNF3_HUMAN	-	-	58	768.6724137931035	70.83769402072319	741.7241379310345	65.78879296224586	012345	0.04266839638616337	EueidesHeliconius	0.0212632353313	1	1	1
OG_10130.Eueides	OG_10130	Heliconiinae	sp|P17036|ZNF3_HUMAN	-	-	58	768.6724137931035	70.83769402072319	741.7241379310345	65.78879296224586	012345	0.04266839638616337	Eueides	692.697500754	0.00478897130127	0.0652252364662	0.195675709398
OG_10133.Heliconius	OG_10133	Nymphalidae	sp|Q6NRK3|SWAHB_XENLA	-	-	58	1062.8275862068965	326.6894094908556	833.7413793103449	102.17523155307792	012230	0.1184229476446761	Heliconius	0.0775600202014	1	1	1
OG_10133.EueidesHeliconius	OG_10133	Nymphalidae	sp|Q6NRK3|SWAHB_XENLA	-	-	58	1062.8275862068965	326.6894094908556	833.7413793103449	102.17523155307792	012230	0.1184229476446761	EueidesHeliconius	0.169227171861	1	1	1
OG_10133.Heliconiini	OG_10133	Nymphalidae	sp|Q6NRK3|SWAHB_XENLA	-	-	58	1062.8275862068965	326.6894094908556	833.7413793103449	102.17523155307792	012230	0.1184229476446761	Heliconiini	0.0824621779522	1	1	1
OG_10133.Eueides	OG_10133	Nymphalidae	sp|Q6NRK3|SWAHB_XENLA	-	-	58	1062.8275862068965	326.6894094908556	833.7413793103449	102.17523155307792	012230	0.1184229476446761	Eueides	0.250894697454	1	1	1
OG_10134.Heliconius	OG_10134	Nymphalidae	FBgn0036302	39438	sowah	60	883.5	410.0092072136917	649.3	116.53415808251243	012345	0.04444260151377256	Heliconius	0.0630712224838	1	1	1
OG_10134.EueidesHeliconius	OG_10134	Nymphalidae	FBgn0036302	39438	sowah	60	883.5	410.0092072136917	649.3	116.53415808251243	012345	0.04444260151377256	EueidesHeliconius	0	1	1	1
OG_10134.Heliconiini	OG_10134	Nymphalidae	FBgn0036302	39438	sowah	60	883.5	410.0092072136917	649.3	116.53415808251243	012345	0.04444260151377256	Heliconiini	0.0238973425888	1	1	1
OG_10134.Eueides	OG_10134	Nymphalidae	FBgn0036302	39438	sowah	60	883.5	410.0092072136917	649.3	116.53415808251243	012345	0.04444260151377256	Eueides	0.0686277828163	1	1	1
OG_10135.Heliconius	OG_10135	Nymphalidae	-	47757	-	62	1296.725806451613	278.8697331079593	1192.2096774193549	267.85245921280534	012345	0.08413377691545698	Heliconius	0.126323230004	1	1	1
OG_10135.EueidesHeliconius	OG_10135	Nymphalidae	-	47757	-	62	1296.725806451613	278.8697331079593	1192.2096774193549	267.85245921280534	012345	0.08413377691545698	EueidesHeliconius	0.0460243602475	1	1	1
OG_10135.Heliconiini	OG_10135	Nymphalidae	-	47757	-	62	1296.725806451613	278.8697331079593	1192.2096774193549	267.85245921280534	012345	0.08413377691545698	Heliconiini	0.123785766997	1	1	1
OG_10135.DioneAgraulisEueidesHeliconius	OG_10135	Nymphalidae	-	47757	-	62	1296.725806451613	278.8697331079593	1192.2096774193549	267.85245921280534	012345	0.08413377691545698	DioneAgraulisEueidesHeliconius	0.0665237705497	1	1	1
OG_10135.Eueides	OG_10135	Nymphalidae	-	47757	-	62	1296.725806451613	278.8697331079593	1192.2096774193549	267.85245921280534	012345	0.08413377691545698	Eueides	0.080682814369	1	1	1
OG_10140.Heliconius	OG_10140	Nymphalidae	FBgn0034087	36793	clu	63	4328.619047619048	993.9844051756678	4125.047619047619	955.903834383757	012230	0.07922322753899755	Heliconius	159.562058538	0.00269574565226	0.000136985303579	0.000684926517893
OG_10140.EueidesHeliconius	OG_10140	Nymphalidae	FBgn0034087	36793	clu	63	4328.619047619048	993.9844051756678	4125.047619047619	955.903834383757	012230	0.07922322753899755	EueidesHeliconius	101.109941937	0.00288458669839	0.0285693685638	0.114277474255
OG_10140.Heliconiini	OG_10140	Nymphalidae	FBgn0034087	36793	clu	63	4328.619047619048	993.9844051756678	4125.047619047619	955.903834383757	012230	0.07922322753899755	Heliconiini	2.03619808237	0.0533272754031	0.125263089328	0.375789267985
OG_10140.DioneAgraulisEueidesHeliconius	OG_10140	Nymphalidae	FBgn0034087	36793	clu	63	4328.619047619048	993.9844051756678	4125.047619047619	955.903834383757	012230	0.07922322753899755	DioneAgraulisEueidesHeliconius	0.366077749129	1	1	1
OG_10140.Eueides	OG_10140	Nymphalidae	FBgn0034087	36793	clu	63	4328.619047619048	993.9844051756678	4125.047619047619	955.903834383757	012230	0.07922322753899755	Eueides	0.100306079441	1	1	1
OG_10141.Heliconius	OG_10141	Nymphalidae	sp|Q5RC74|DERL2_PONAB	-	-	62	746.0806451612904	126.72325681949073	722.1774193548387	75.32285867186376	012345	0.05734595775470774	Heliconius	0	1	1	1
OG_10141.EueidesHeliconius	OG_10141	Nymphalidae	sp|Q5RC74|DERL2_PONAB	-	-	62	746.0806451612904	126.72325681949073	722.1774193548387	75.32285867186376	012345	0.05734595775470774	EueidesHeliconius	0.048959718352	1	1	1
OG_10141.Heliconiini	OG_10141	Nymphalidae	sp|Q5RC74|DERL2_PONAB	-	-	62	746.0806451612904	126.72325681949073	722.1774193548387	75.32285867186376	012345	0.05734595775470774	Heliconiini	0.0682459331313	1	1	1
OG_10141.DioneAgraulisEueidesHeliconius	OG_10141	Nymphalidae	sp|Q5RC74|DERL2_PONAB	-	-	62	746.0806451612904	126.72325681949073	722.1774193548387	75.32285867186376	012345	0.05734595775470774	DioneAgraulisEueidesHeliconius	0	1	1	1
OG_10141.Eueides	OG_10141	Nymphalidae	sp|Q5RC74|DERL2_PONAB	-	-	62	746.0806451612904	126.72325681949073	722.1774193548387	75.32285867186376	012345	0.05734595775470774	Eueides	0	1	1	1
OG_10144.Heliconius	OG_10144	Nymphalidae	sp|Q5U3N5|PPTC7_DANRE	-	-	62	888.1451612903226	82.05659863662824	866.0806451612904	107.03953119429029	012230	0.04109287041499053	Heliconius	0	1	1	1
OG_10144.EueidesHeliconius	OG_10144	Nymphalidae	sp|Q5U3N5|PPTC7_DANRE	-	-	62	888.1451612903226	82.05659863662824	866.0806451612904	107.03953119429029	012230	0.04109287041499053	EueidesHeliconius	0.0686869723971	1	1	1
OG_10144.Heliconiini	OG_10144	Nymphalidae	sp|Q5U3N5|PPTC7_DANRE	-	-	62	888.1451612903226	82.05659863662824	866.0806451612904	107.03953119429029	012230	0.04109287041499053	Heliconiini	3.22538731907	0.0354700274987	0.293352122544	1
OG_10144.DioneAgraulisEueidesHeliconius	OG_10144	Nymphalidae	sp|Q5U3N5|PPTC7_DANRE	-	-	62	888.1451612903226	82.05659863662824	866.0806451612904	107.03953119429029	012230	0.04109287041499053	DioneAgraulisEueidesHeliconius	23.8162289942	0.00980051777716	0.0965147232056	0.482573616028
OG_10144.Eueides	OG_10144	Nymphalidae	sp|Q5U3N5|PPTC7_DANRE	-	-	62	888.1451612903226	82.05659863662824	866.0806451612904	107.03953119429029	012230	0.04109287041499053	Eueides	0.0347723369922	1	1	1
OG_10145.Heliconius	OG_10145	Nymphalidae	sp|Q7KRI2|LOLAL_DROME	-	-	62	1204.0645161290322	110.16920577995117	1164.774193548387	119.84861679189412	012345	0.08267922088751235	Heliconius	0.0864558246637	1	1	1
OG_10145.EueidesHeliconius	OG_10145	Nymphalidae	sp|Q7KRI2|LOLAL_DROME	-	-	62	1204.0645161290322	110.16920577995117	1164.774193548387	119.84861679189412	012345	0.08267922088751235	EueidesHeliconius	0.0543254136824	1	1	1
OG_10145.Heliconiini	OG_10145	Nymphalidae	sp|Q7KRI2|LOLAL_DROME	-	-	62	1204.0645161290322	110.16920577995117	1164.774193548387	119.84861679189412	012345	0.08267922088751235	Heliconiini	0.0640379492834	1	1	1
OG_10145.Eueides	OG_10145	Nymphalidae	sp|Q7KRI2|LOLAL_DROME	-	-	62	1204.0645161290322	110.16920577995117	1164.774193548387	119.84861679189412	012345	0.08267922088751235	Eueides	0.171073087262	1	1	1
OG_10155.Heliconius	OG_10155	Nymphalidae	sp|C0KYB6|DDRGK_BOMMO	-	-	60	812.05	151.39599565378205	799.65	157.89277215882936	012345	0.06025058192842207	Heliconius	0.0174034468258	1	1	1
OG_10155.EueidesHeliconius	OG_10155	Nymphalidae	sp|C0KYB6|DDRGK_BOMMO	-	-	60	812.05	151.39599565378205	799.65	157.89277215882936	012345	0.06025058192842207	EueidesHeliconius	0.0236965117467	1	1	1
OG_10155.Heliconiini	OG_10155	Nymphalidae	sp|C0KYB6|DDRGK_BOMMO	-	-	60	812.05	151.39599565378205	799.65	157.89277215882936	012345	0.06025058192842207	Heliconiini	0.0455396237399	1	1	1
OG_10155.DioneAgraulisEueidesHeliconius	OG_10155	Nymphalidae	sp|C0KYB6|DDRGK_BOMMO	-	-	60	812.05	151.39599565378205	799.65	157.89277215882936	012345	0.06025058192842207	DioneAgraulisEueidesHeliconius	0.0376037325691	1	1	1
OG_10155.Eueides	OG_10155	Nymphalidae	sp|C0KYB6|DDRGK_BOMMO	-	-	60	812.05	151.39599565378205	799.65	157.89277215882936	012345	0.06025058192842207	Eueides	0.0432178109073	1	1	1
OG_10156.Heliconius	OG_10156	Nymphalidae	sp|Q80TG1|KANL1_MOUSE	-	-	61	2257.3278688524592	366.10742494570667	2030.9016393442623	366.77235110937164	012345	0.09982073007624981	Heliconius	0.0206012766066	1	1	1
OG_10156.EueidesHeliconius	OG_10156	Nymphalidae	sp|Q80TG1|KANL1_MOUSE	-	-	61	2257.3278688524592	366.10742494570667	2030.9016393442623	366.77235110937164	012345	0.09982073007624981	EueidesHeliconius	2.25734125847	0.0349755094198	0.249072071265	0.747216213796
OG_10156.Heliconiini	OG_10156	Nymphalidae	sp|Q80TG1|KANL1_MOUSE	-	-	61	2257.3278688524592	366.10742494570667	2030.9016393442623	366.77235110937164	012345	0.09982073007624981	Heliconiini	76.0124103869	0.0147866280306	0.000750119696994	0.00375059848497
OG_10156.DioneAgraulisEueidesHeliconius	OG_10156	Nymphalidae	sp|Q80TG1|KANL1_MOUSE	-	-	61	2257.3278688524592	366.10742494570667	2030.9016393442623	366.77235110937164	012345	0.09982073007624981	DioneAgraulisEueidesHeliconius	7.84984869608	0.024596237064	0.0150843313417	0.0603373253667
OG_10156.Eueides	OG_10156	Nymphalidae	sp|Q80TG1|KANL1_MOUSE	-	-	61	2257.3278688524592	366.10742494570667	2030.9016393442623	366.77235110937164	012345	0.09982073007624981	Eueides	0.0874618624418	1	1	1
OG_10157.Heliconius	OG_10157	Nymphalidae	sp|Q9W440|THEM6_DROME	-	-	63	672.1904761904761	127.51232211143139	624.2857142857143	102.59032854126204	010020	0.02850512968895778	Heliconius	0	1	1	1
OG_10157.EueidesHeliconius	OG_10157	Nymphalidae	sp|Q9W440|THEM6_DROME	-	-	63	672.1904761904761	127.51232211143139	624.2857142857143	102.59032854126204	010020	0.02850512968895778	EueidesHeliconius	0.0315162597232	1	1	1
OG_10157.Heliconiini	OG_10157	Nymphalidae	sp|Q9W440|THEM6_DROME	-	-	63	672.1904761904761	127.51232211143139	624.2857142857143	102.59032854126204	010020	0.02850512968895778	Heliconiini	0.0418008237777	1	1	1
OG_10157.DioneAgraulisEueidesHeliconius	OG_10157	Nymphalidae	sp|Q9W440|THEM6_DROME	-	-	63	672.1904761904761	127.51232211143139	624.2857142857143	102.59032854126204	010020	0.02850512968895778	DioneAgraulisEueidesHeliconius	0	1	1	1
OG_10157.Eueides	OG_10157	Nymphalidae	sp|Q9W440|THEM6_DROME	-	-	63	672.1904761904761	127.51232211143139	624.2857142857143	102.59032854126204	010020	0.02850512968895778	Eueides	0.0460939058088	1	1	1
OG_10159.Heliconius	OG_10159	Nymphalidae	FBgn0032819	35264	CG10463	61	1748.655737704918	158.7042703202986	1719.688524590164	155.77322114436748	012345	0.1025736553426947	Heliconius	0.0332944900325	1	1	1
OG_10159.EueidesHeliconius	OG_10159	Nymphalidae	FBgn0032819	35264	CG10463	61	1748.655737704918	158.7042703202986	1719.688524590164	155.77322114436748	012345	0.1025736553426947	EueidesHeliconius	0.128067037831	1	1	1
OG_10159.Heliconiini	OG_10159	Nymphalidae	FBgn0032819	35264	CG10463	61	1748.655737704918	158.7042703202986	1719.688524590164	155.77322114436748	012345	0.1025736553426947	Heliconiini	2.74786126657	0.0765285605906	0.120069978064	0.60034989032
OG_10159.DioneAgraulisEueidesHeliconius	OG_10159	Nymphalidae	FBgn0032819	35264	CG10463	61	1748.655737704918	158.7042703202986	1719.688524590164	155.77322114436748	012345	0.1025736553426947	DioneAgraulisEueidesHeliconius	0.108386432536	1	1	1
OG_10159.Eueides	OG_10159	Nymphalidae	FBgn0032819	35264	CG10463	61	1748.655737704918	158.7042703202986	1719.688524590164	155.77322114436748	012345	0.1025736553426947	Eueides	0.10143012429	1	1	1
OG_10162.Heliconius	OG_10162	Nymphalidae	FBgn0034136	36849	DAT	61	1569.049180327869	372.5494983607364	1497.4918032786886	321.41554855178765	012345	0.1071620643785389	Heliconius	0.102656159511	1	1	1
OG_10162.EueidesHeliconius	OG_10162	Nymphalidae	FBgn0034136	36849	DAT	61	1569.049180327869	372.5494983607364	1497.4918032786886	321.41554855178765	012345	0.1071620643785389	EueidesHeliconius	0.0792402104768	1	1	1
OG_10162.Heliconiini	OG_10162	Nymphalidae	FBgn0034136	36849	DAT	61	1569.049180327869	372.5494983607364	1497.4918032786886	321.41554855178765	012345	0.1071620643785389	Heliconiini	1.09704398164	0.100891883356	0.47229925581	1
OG_10162.Eueides	OG_10162	Nymphalidae	FBgn0034136	36849	DAT	61	1569.049180327869	372.5494983607364	1497.4918032786886	321.41554855178765	012345	0.1071620643785389	Eueides	89.3372302218	0.00450169559295	0.0102748119557	0.0410992478229
OG_10163.Heliconius	OG_10163	Nymphalidae	sp|Q9ZUB3|SPD1_ARATH	-	-	63	1087.7142857142858	254.81910350325794	1070.3809523809523	267.60693922785805	012345	0.06790033699614439	Heliconius	0.0100387019602	1	1	1
OG_10163.EueidesHeliconius	OG_10163	Nymphalidae	sp|Q9ZUB3|SPD1_ARATH	-	-	63	1087.7142857142858	254.81910350325794	1070.3809523809523	267.60693922785805	012345	0.06790033699614439	EueidesHeliconius	0.102429252235	1	1	1
OG_10163.Heliconiini	OG_10163	Nymphalidae	sp|Q9ZUB3|SPD1_ARATH	-	-	63	1087.7142857142858	254.81910350325794	1070.3809523809523	267.60693922785805	012345	0.06790033699614439	Heliconiini	0.0309261080218	1	1	1
OG_10163.DioneAgraulisEueidesHeliconius	OG_10163	Nymphalidae	sp|Q9ZUB3|SPD1_ARATH	-	-	63	1087.7142857142858	254.81910350325794	1070.3809523809523	267.60693922785805	012345	0.06790033699614439	DioneAgraulisEueidesHeliconius	0.168126154181	1	1	1
OG_10163.Eueides	OG_10163	Nymphalidae	sp|Q9ZUB3|SPD1_ARATH	-	-	63	1087.7142857142858	254.81910350325794	1070.3809523809523	267.60693922785805	012345	0.06790033699614439	Eueides	0.047097638386	1	1	1
OG_10165.Heliconius	OG_10165	Nymphalidae	sp|Q06852|SLAP1_CLOTH	-	-	63	3948.714285714286	817.9772463279186	3795.095238095238	794.505770590204	012345	0.09078908952843336	Heliconius	0.0783567768698	1	1	1
OG_10165.EueidesHeliconius	OG_10165	Nymphalidae	sp|Q06852|SLAP1_CLOTH	-	-	63	3948.714285714286	817.9772463279186	3795.095238095238	794.505770590204	012345	0.09078908952843336	EueidesHeliconius	0.0340848037652	1	1	1
OG_10165.Heliconiini	OG_10165	Nymphalidae	sp|Q06852|SLAP1_CLOTH	-	-	63	3948.714285714286	817.9772463279186	3795.095238095238	794.505770590204	012345	0.09078908952843336	Heliconiini	6.40606375008	0.00763194160323	0.24853721741	0.99414886964
OG_10165.Eueides	OG_10165	Nymphalidae	sp|Q06852|SLAP1_CLOTH	-	-	63	3948.714285714286	817.9772463279186	3795.095238095238	794.505770590204	012345	0.09078908952843336	Eueides	0.0723114414714	1	1	1
OG_10170.Heliconius	OG_10170	Nymphalidae	sp|P99026|PSB4_MOUSE	-	-	63	739.4761904761905	157.97275806369095	714.2380952380952	155.46915319886412	012345	0.04319018595237923	Heliconius	0.0403638018414	1	1	1
OG_10170.EueidesHeliconius	OG_10170	Nymphalidae	sp|P99026|PSB4_MOUSE	-	-	63	739.4761904761905	157.97275806369095	714.2380952380952	155.46915319886412	012345	0.04319018595237923	EueidesHeliconius	0.0284236744553	1	1	1
OG_10170.Heliconiini	OG_10170	Nymphalidae	sp|P99026|PSB4_MOUSE	-	-	63	739.4761904761905	157.97275806369095	714.2380952380952	155.46915319886412	012345	0.04319018595237923	Heliconiini	3.97431506964	0.0312759816072	0.0732281760617	0.292912704247
OG_10170.Eueides	OG_10170	Nymphalidae	sp|P99026|PSB4_MOUSE	-	-	63	739.4761904761905	157.97275806369095	714.2380952380952	155.46915319886412	012345	0.04319018595237923	Eueides	0.0201223520387	1	1	1
OG_10171.Heliconius	OG_10171	Nymphalidae	FBgn0039078	42767	CG4374	61	1710.7868852459017	143.98043067780827	1695.5409836065573	168.00483733965612	012230	0.04039374476496908	Heliconius	0.0645367129168	1	1	1
OG_10171.EueidesHeliconius	OG_10171	Nymphalidae	FBgn0039078	42767	CG4374	61	1710.7868852459017	143.98043067780827	1695.5409836065573	168.00483733965612	012230	0.04039374476496908	EueidesHeliconius	0.033334016261	1	1	1
OG_10171.Heliconiini	OG_10171	Nymphalidae	FBgn0039078	42767	CG4374	61	1710.7868852459017	143.98043067780827	1695.5409836065573	168.00483733965612	012230	0.04039374476496908	Heliconiini	0.02418863245	1	1	1
OG_10171.DioneAgraulisEueidesHeliconius	OG_10171	Nymphalidae	FBgn0039078	42767	CG4374	61	1710.7868852459017	143.98043067780827	1695.5409836065573	168.00483733965612	012230	0.04039374476496908	DioneAgraulisEueidesHeliconius	0.113949642135	1	1	1
OG_10171.Eueides	OG_10171	Nymphalidae	FBgn0039078	42767	CG4374	61	1710.7868852459017	143.98043067780827	1695.5409836065573	168.00483733965612	012230	0.04039374476496908	Eueides	0.01397861694	1	1	1
OG_10173.Heliconius	OG_10173	Nymphalidae	FBgn0042098	59137	CG18735	63	1017.952380952381	413.92022191888464	740.1428571428571	100.00632633049996	012345	0.1048673003298728	Heliconius	54.878287154	0.0169441439544	7.89402140081e-05	0.000394701070041
OG_10173.EueidesHeliconius	OG_10173	Nymphalidae	FBgn0042098	59137	CG18735	63	1017.952380952381	413.92022191888464	740.1428571428571	100.00632633049996	012345	0.1048673003298728	EueidesHeliconius	0.0837877305784	1	1	1
OG_10173.Heliconiini	OG_10173	Nymphalidae	FBgn0042098	59137	CG18735	63	1017.952380952381	413.92022191888464	740.1428571428571	100.00632633049996	012345	0.1048673003298728	Heliconiini	0.102233105866	1	1	1
OG_10173.DioneAgraulisEueidesHeliconius	OG_10173	Nymphalidae	FBgn0042098	59137	CG18735	63	1017.952380952381	413.92022191888464	740.1428571428571	100.00632633049996	012345	0.1048673003298728	DioneAgraulisEueidesHeliconius	0.0209065615284	1	1	1
OG_10173.Eueides	OG_10173	Nymphalidae	FBgn0042098	59137	CG18735	63	1017.952380952381	413.92022191888464	740.1428571428571	100.00632633049996	012345	0.1048673003298728	Eueides	0.045501511221	1	1	1
OG_10175.Heliconius	OG_10175	Nymphalidae	sp|Q9UHB9|SRP68_HUMAN	-	-	62	1704.0	253.948686714208	1673.0806451612902	250.2645244656849	012345	0.05562537949985816	Heliconius	0.0200121826598	1	1	1
OG_10175.EueidesHeliconius	OG_10175	Nymphalidae	sp|Q9UHB9|SRP68_HUMAN	-	-	62	1704.0	253.948686714208	1673.0806451612902	250.2645244656849	012345	0.05562537949985816	EueidesHeliconius	0.0397494174982	1	1	1
OG_10175.Heliconiini	OG_10175	Nymphalidae	sp|Q9UHB9|SRP68_HUMAN	-	-	62	1704.0	253.948686714208	1673.0806451612902	250.2645244656849	012345	0.05562537949985816	Heliconiini	1.34592203151	0.0574958463782	0.398989915654	1
OG_10175.DioneAgraulisEueidesHeliconius	OG_10175	Nymphalidae	sp|Q9UHB9|SRP68_HUMAN	-	-	62	1704.0	253.948686714208	1673.0806451612902	250.2645244656849	012345	0.05562537949985816	DioneAgraulisEueidesHeliconius	0.0242500790396	1	1	1
OG_10175.Eueides	OG_10175	Nymphalidae	sp|Q9UHB9|SRP68_HUMAN	-	-	62	1704.0	253.948686714208	1673.0806451612902	250.2645244656849	012345	0.05562537949985816	Eueides	4.13271423033	0.0118388764566	0.211094520111	1
OG_10177.Heliconius	OG_10177	Nymphalidae	sp|Q29MA5|RM24_DROPS	-	-	57	726.421052631579	121.31312932350063	702.6315789473684	133.75830934397894	012345	0.06696323522122712	Heliconius	5.38201421373	0.0303644974722	0.176525421317	0.706101685268
OG_10177.EueidesHeliconius	OG_10177	Nymphalidae	sp|Q29MA5|RM24_DROPS	-	-	57	726.421052631579	121.31312932350063	702.6315789473684	133.75830934397894	012345	0.06696323522122712	EueidesHeliconius	9.07676390767	0.023531213623	0.0594296348437	0.297148174219
OG_10177.Heliconiini	OG_10177	Nymphalidae	sp|Q29MA5|RM24_DROPS	-	-	57	726.421052631579	121.31312932350063	702.6315789473684	133.75830934397894	012345	0.06696323522122712	Heliconiini	0.122544396804	1	1	1
OG_10177.DioneAgraulisEueidesHeliconius	OG_10177	Nymphalidae	sp|Q29MA5|RM24_DROPS	-	-	57	726.421052631579	121.31312932350063	702.6315789473684	133.75830934397894	012345	0.06696323522122712	DioneAgraulisEueidesHeliconius	0.0285138693207	1	1	1
OG_10177.Eueides	OG_10177	Nymphalidae	sp|Q29MA5|RM24_DROPS	-	-	57	726.421052631579	121.31312932350063	702.6315789473684	133.75830934397894	012345	0.06696323522122712	Eueides	0.032475945593	1	1	1
OG_10181.Heliconius	OG_10181	Nymphalidae	sp|P82205|SODC_BOMMO	-	-	60	457.2	64.04654557429308	444.0	44.80959718631713	012230	0.07648980140052949	Heliconius	3846.11686426	0.00702713665712	0.0381690178152	0.190845089076
OG_10181.EueidesHeliconius	OG_10181	Nymphalidae	sp|P82205|SODC_BOMMO	-	-	60	457.2	64.04654557429308	444.0	44.80959718631713	012230	0.07648980140052949	EueidesHeliconius	0.0104065047343	1	1	1
OG_10181.Heliconiini	OG_10181	Nymphalidae	sp|P82205|SODC_BOMMO	-	-	60	457.2	64.04654557429308	444.0	44.80959718631713	012230	0.07648980140052949	Heliconiini	0.117563092119	1	1	1
OG_10181.DioneAgraulisEueidesHeliconius	OG_10181	Nymphalidae	sp|P82205|SODC_BOMMO	-	-	60	457.2	64.04654557429308	444.0	44.80959718631713	012230	0.07648980140052949	DioneAgraulisEueidesHeliconius	0.0482490844071	1	1	1
OG_10181.Eueides	OG_10181	Nymphalidae	sp|P82205|SODC_BOMMO	-	-	60	457.2	64.04654557429308	444.0	44.80959718631713	012230	0.07648980140052949	Eueides	0.0265144575485	1	1	1
OG_10190.EueidesHeliconius	OG_10190	Nymphalidae	sp|Q9VBB3|INT12_DROME	-	-	56	714.0	63.068839940406164	693.3214285714286	64.75533820875783	012310	0.04198316187281478	EueidesHeliconius	0.0760486741584	1	1	1
OG_10190.Heliconiini	OG_10190	Nymphalidae	sp|Q9VBB3|INT12_DROME	-	-	56	714.0	63.068839940406164	693.3214285714286	64.75533820875783	012310	0.04198316187281478	Heliconiini	9.10183796569	0.0228161874751	0.123504932867	0.3705147986
OG_10190.DioneAgraulisEueidesHeliconius	OG_10190	Nymphalidae	sp|Q9VBB3|INT12_DROME	-	-	56	714.0	63.068839940406164	693.3214285714286	64.75533820875783	012310	0.04198316187281478	DioneAgraulisEueidesHeliconius	100000	0.00507129804678	0.0445316861437	0.178126744575
OG_10190.Eueides	OG_10190	Nymphalidae	sp|Q9VBB3|INT12_DROME	-	-	56	714.0	63.068839940406164	693.3214285714286	64.75533820875783	012310	0.04198316187281478	Eueides	0.04845105945	1	1	1
OG_10196.Heliconius	OG_10196	Heliconiinae	sp|Q24546|SYN_DROME	-	-	37	1187.3513513513512	389.25154905808637	811.8648648648649	221.70983741991586	010020	0.06057362010244029	Heliconius	0	1	1	1
OG_10196.Eueides	OG_10196	Heliconiinae	sp|Q24546|SYN_DROME	-	-	37	1187.3513513513512	389.25154905808637	811.8648648648649	221.70983741991586	010020	0.06057362010244029	Eueides	0.0794737746885	1	1	1
OG_10197.Heliconius	OG_10197	Nymphalidae	sp|Q6GP52|BECN1_XENLA	-	-	58	580.9137931034483	50.06247286202153	552.2068965517242	41.60974629723586	012345	0.3164289474088011	Heliconius	0.420085305161	1	1	1
OG_10197.EueidesHeliconius	OG_10197	Nymphalidae	sp|Q6GP52|BECN1_XENLA	-	-	58	580.9137931034483	50.06247286202153	552.2068965517242	41.60974629723586	012345	0.3164289474088011	EueidesHeliconius	0.0833373820282	1	1	1
OG_10197.Heliconiini	OG_10197	Nymphalidae	sp|Q6GP52|BECN1_XENLA	-	-	58	580.9137931034483	50.06247286202153	552.2068965517242	41.60974629723586	012345	0.3164289474088011	Heliconiini	0.455452416608	1	1	1
OG_10197.Eueides	OG_10197	Nymphalidae	sp|Q6GP52|BECN1_XENLA	-	-	58	580.9137931034483	50.06247286202153	552.2068965517242	41.60974629723586	012345	0.3164289474088011	Eueides	0.342582236112	1	1	1
OG_102.Heliconius	OG_102	Nymphalidae	FBgn0261862	36109	whd	63	1793.2857142857142	394.1854945094158	1702.3809523809523	347.36429021040533	012345	0.1448928579679055	Heliconius	0.0641797171801	1	1	1
OG_102.EueidesHeliconius	OG_102	Nymphalidae	FBgn0261862	36109	whd	63	1793.2857142857142	394.1854945094158	1702.3809523809523	347.36429021040533	012345	0.1448928579679055	EueidesHeliconius	34.8475870086	0.0130899519062	0.000845514742961	0.0042275737148
OG_102.Heliconiini	OG_102	Nymphalidae	FBgn0261862	36109	whd	63	1793.2857142857142	394.1854945094158	1702.3809523809523	347.36429021040533	012345	0.1448928579679055	Heliconiini	4.97966051499	0.03182247841	0.099027155354	0.396108621416
OG_102.DioneAgraulisEueidesHeliconius	OG_102	Nymphalidae	FBgn0261862	36109	whd	63	1793.2857142857142	394.1854945094158	1702.3809523809523	347.36429021040533	012345	0.1448928579679055	DioneAgraulisEueidesHeliconius	7.95630883156	0.0137047329777	0.110838402016	0.332515206047
OG_102.Eueides	OG_102	Nymphalidae	FBgn0261862	36109	whd	63	1793.2857142857142	394.1854945094158	1702.3809523809523	347.36429021040533	012345	0.1448928579679055	Eueides	1.60379299454	0.0971372299453	0.363256223054	0.726512446107
OG_1020.Heliconius	OG_1020	Nymphalidae	FBgn0034455	37249	CG11007	58	851.0689655172414	816.7951007584875	596.6896551724138	83.51960473890644	012345	0.05909067978291672	Heliconius	0.0431580879943	1	1	1
OG_1020.EueidesHeliconius	OG_1020	Nymphalidae	FBgn0034455	37249	CG11007	58	851.0689655172414	816.7951007584875	596.6896551724138	83.51960473890644	012345	0.05909067978291672	EueidesHeliconius	0.00877370181894	1	1	1
OG_1020.Heliconiini	OG_1020	Nymphalidae	FBgn0034455	37249	CG11007	58	851.0689655172414	816.7951007584875	596.6896551724138	83.51960473890644	012345	0.05909067978291672	Heliconiini	0.0281451052345	1	1	1
OG_1020.DioneAgraulisEueidesHeliconius	OG_1020	Nymphalidae	FBgn0034455	37249	CG11007	58	851.0689655172414	816.7951007584875	596.6896551724138	83.51960473890644	012345	0.05909067978291672	DioneAgraulisEueidesHeliconius	0.512887653273	1	1	1
OG_1020.Eueides	OG_1020	Nymphalidae	FBgn0034455	37249	CG11007	58	851.0689655172414	816.7951007584875	596.6896551724138	83.51960473890644	012345	0.05909067978291672	Eueides	0.0528909532203	1	1	1
OG_10200.Heliconius	OG_10200	Nymphalidae	FBgn0265434	38001	-	61	1121.2131147540983	152.40133758223936	1029.7868852459017	143.47332130526524	010020	0.1402584105363417	Heliconius	0.13117994467	1	1	1
OG_10200.EueidesHeliconius	OG_10200	Nymphalidae	FBgn0265434	38001	-	61	1121.2131147540983	152.40133758223936	1029.7868852459017	143.47332130526524	010020	0.1402584105363417	EueidesHeliconius	0.0788923004218	1	1	1
OG_10200.Heliconiini	OG_10200	Nymphalidae	FBgn0265434	38001	-	61	1121.2131147540983	152.40133758223936	1029.7868852459017	143.47332130526524	010020	0.1402584105363417	Heliconiini	0.0719042914365	1	1	1
OG_10200.Eueides	OG_10200	Nymphalidae	FBgn0265434	38001	-	61	1121.2131147540983	152.40133758223936	1029.7868852459017	143.47332130526524	010020	0.1402584105363417	Eueides	3.94687065125	0.0167824814622	0.230701696389	0.922806785555
OG_10201.Heliconius	OG_10201	Nymphalidae	sp|O32044|RECJ_BACSU	-	-	60	421.3	74.17216459022886	354.55	18.906282024766266	012230	0.1334467476286016	Heliconius	0.106652475208	1	1	1
OG_10201.EueidesHeliconius	OG_10201	Nymphalidae	sp|O32044|RECJ_BACSU	-	-	60	421.3	74.17216459022886	354.55	18.906282024766266	012230	0.1334467476286016	EueidesHeliconius	10000000000	1	0.265728598258	1
OG_10201.Heliconiini	OG_10201	Nymphalidae	sp|O32044|RECJ_BACSU	-	-	60	421.3	74.17216459022886	354.55	18.906282024766266	012230	0.1334467476286016	Heliconiini	0.0701877394318	1	1	1
OG_10201.DioneAgraulisEueidesHeliconius	OG_10201	Nymphalidae	sp|O32044|RECJ_BACSU	-	-	60	421.3	74.17216459022886	354.55	18.906282024766266	012230	0.1334467476286016	DioneAgraulisEueidesHeliconius	0.033273974036	1	1	1
OG_10201.Eueides	OG_10201	Nymphalidae	sp|O32044|RECJ_BACSU	-	-	60	421.3	74.17216459022886	354.55	18.906282024766266	012230	0.1334467476286016	Eueides	0.121487802309	1	1	1
OG_10202.Heliconius	OG_10202	Nymphalidae	sp|Q13231|CHIT1_HUMAN	-	-	62	1293.9193548387098	275.31467617203555	1247.225806451613	275.99418059285927	012345	0.1520790680642044	Heliconius	2.06051840576	0.0826192423612	0.295543634093	0.886630902279
OG_10202.EueidesHeliconius	OG_10202	Nymphalidae	sp|Q13231|CHIT1_HUMAN	-	-	62	1293.9193548387098	275.31467617203555	1247.225806451613	275.99418059285927	012345	0.1520790680642044	EueidesHeliconius	4.49690951677	0.0403500474753	0.170127706223	0.850638531113
OG_10202.Heliconiini	OG_10202	Nymphalidae	sp|Q13231|CHIT1_HUMAN	-	-	62	1293.9193548387098	275.31467617203555	1247.225806451613	275.99418059285927	012345	0.1520790680642044	Heliconiini	1.62850506968	0.0966611531272	0.246699555833	0.986798223331
OG_10202.DioneAgraulisEueidesHeliconius	OG_10202	Nymphalidae	sp|Q13231|CHIT1_HUMAN	-	-	62	1293.9193548387098	275.31467617203555	1247.225806451613	275.99418059285927	012345	0.1520790680642044	DioneAgraulisEueidesHeliconius	10000000000	1	0.37090576439	0.741811528781
OG_10202.Eueides	OG_10202	Nymphalidae	sp|Q13231|CHIT1_HUMAN	-	-	62	1293.9193548387098	275.31467617203555	1247.225806451613	275.99418059285927	012345	0.1520790680642044	Eueides	0.182530729586	1	1	1
OG_10203.Heliconius	OG_10203	Nymphalidae	sp|Q5I0J5|MITD1_RAT	-	-	62	690.3870967741935	93.55011678044981	677.516129032258	96.88382499832433	012345	0.07918755440575471	Heliconius	0.0142153091359	1	1	1
OG_10203.EueidesHeliconius	OG_10203	Nymphalidae	sp|Q5I0J5|MITD1_RAT	-	-	62	690.3870967741935	93.55011678044981	677.516129032258	96.88382499832433	012345	0.07918755440575471	EueidesHeliconius	0.0606765918165	1	1	1
OG_10203.Heliconiini	OG_10203	Nymphalidae	sp|Q5I0J5|MITD1_RAT	-	-	62	690.3870967741935	93.55011678044981	677.516129032258	96.88382499832433	012345	0.07918755440575471	Heliconiini	2.04714295497	0.0460946840411	0.5	1
OG_10203.DioneAgraulisEueidesHeliconius	OG_10203	Nymphalidae	sp|Q5I0J5|MITD1_RAT	-	-	62	690.3870967741935	93.55011678044981	677.516129032258	96.88382499832433	012345	0.07918755440575471	DioneAgraulisEueidesHeliconius	0.0323240841721	1	1	1
OG_10203.Eueides	OG_10203	Nymphalidae	sp|Q5I0J5|MITD1_RAT	-	-	62	690.3870967741935	93.55011678044981	677.516129032258	96.88382499832433	012345	0.07918755440575471	Eueides	1.95589333407	0.0596226902248	0.5	1
OG_10204.Heliconius	OG_10204	Nymphalidae	sp|Q9DBQ9|SWT1_MOUSE	-	-	63	2255.0476190476193	400.1806111519523	2157.2380952380954	391.8641534246645	012345	0.1307134564600785	Heliconius	0.0716599559233	1	1	1
OG_10204.EueidesHeliconius	OG_10204	Nymphalidae	sp|Q9DBQ9|SWT1_MOUSE	-	-	63	2255.0476190476193	400.1806111519523	2157.2380952380954	391.8641534246645	012345	0.1307134564600785	EueidesHeliconius	1.54997497724	0.0586890831612	0.376593330902	1
OG_10204.Heliconiini	OG_10204	Nymphalidae	sp|Q9DBQ9|SWT1_MOUSE	-	-	63	2255.0476190476193	400.1806111519523	2157.2380952380954	391.8641534246645	012345	0.1307134564600785	Heliconiini	3.22036450844	0.0421506749417	0.269726514811	1
OG_10204.DioneAgraulisEueidesHeliconius	OG_10204	Nymphalidae	sp|Q9DBQ9|SWT1_MOUSE	-	-	63	2255.0476190476193	400.1806111519523	2157.2380952380954	391.8641534246645	012345	0.1307134564600785	DioneAgraulisEueidesHeliconius	24.483366211	0.0134698072318	0.00532602289205	0.0266301144603
OG_10204.Eueides	OG_10204	Nymphalidae	sp|Q9DBQ9|SWT1_MOUSE	-	-	63	2255.0476190476193	400.1806111519523	2157.2380952380954	391.8641534246645	012345	0.1307134564600785	Eueides	0.0908287191953	1	1	1
OG_10205.Heliconius	OG_10205	Nymphalidae	sp|Q9Z1S0|BUB1B_MOUSE	-	-	62	4616.903225806452	546.183671980389	4510.693548387097	500.1571878310076	012230	0.07171609687528027	Heliconius	0.0518907082068	1	1	1
OG_10205.EueidesHeliconius	OG_10205	Nymphalidae	sp|Q9Z1S0|BUB1B_MOUSE	-	-	62	4616.903225806452	546.183671980389	4510.693548387097	500.1571878310076	012230	0.07171609687528027	EueidesHeliconius	363.154420156	0.00093632905226	0.0224718737399	0.112359368699
OG_10205.Heliconiini	OG_10205	Nymphalidae	sp|Q9Z1S0|BUB1B_MOUSE	-	-	62	4616.903225806452	546.183671980389	4510.693548387097	500.1571878310076	012230	0.07171609687528027	Heliconiini	0.261749150175	0.232644809935	1	1
OG_10205.DioneAgraulisEueidesHeliconius	OG_10205	Nymphalidae	sp|Q9Z1S0|BUB1B_MOUSE	-	-	62	4616.903225806452	546.183671980389	4510.693548387097	500.1571878310076	012230	0.07171609687528027	DioneAgraulisEueidesHeliconius	8.34355317116	0.0151421311751	0.080973596616	0.323894386464
OG_10205.Eueides	OG_10205	Nymphalidae	sp|Q9Z1S0|BUB1B_MOUSE	-	-	62	4616.903225806452	546.183671980389	4510.693548387097	500.1571878310076	012230	0.07171609687528027	Eueides	0.0486471608693	1	1	1
OG_10206.Heliconius	OG_10206	Nymphalidae	sp|P21513|RNE_ECOLI	-	-	50	1296.48	234.66548446671914	1202.34	218.3268751207693	010010	0.749477552457855	Heliconius	144.279866257	0.00801014615964	0.00418312292236	0.0209156146118
OG_10206.EueidesHeliconius	OG_10206	Nymphalidae	sp|P21513|RNE_ECOLI	-	-	50	1296.48	234.66548446671914	1202.34	218.3268751207693	010010	0.749477552457855	EueidesHeliconius	0.648553062358	1	1	1
OG_10206.Heliconiini	OG_10206	Nymphalidae	sp|P21513|RNE_ECOLI	-	-	50	1296.48	234.66548446671914	1202.34	218.3268751207693	010010	0.749477552457855	Heliconiini	0.644269069776	1	1	1
OG_10206.DioneAgraulisEueidesHeliconius	OG_10206	Nymphalidae	sp|P21513|RNE_ECOLI	-	-	50	1296.48	234.66548446671914	1202.34	218.3268751207693	010010	0.749477552457855	DioneAgraulisEueidesHeliconius	1.76364467071	1	0.322251128205	0.966753384615
OG_10206.Eueides	OG_10206	Nymphalidae	sp|P21513|RNE_ECOLI	-	-	50	1296.48	234.66548446671914	1202.34	218.3268751207693	010010	0.749477552457855	Eueides	359.5987188	0.00299993812854	0.0308444224831	0.123377689932
OG_10208.Heliconius	OG_10208	Nymphalidae	sp|Q17GM7|CISY1_AEDAE	-	-	63	1303.3333333333333	237.18394174611026	1254.4761904761904	258.48636678567584	012345	0.01865200084857914	Heliconius	0	1	1	1
OG_10208.EueidesHeliconius	OG_10208	Nymphalidae	sp|Q17GM7|CISY1_AEDAE	-	-	63	1303.3333333333333	237.18394174611026	1254.4761904761904	258.48636678567584	012345	0.01865200084857914	EueidesHeliconius	0.014531882577	1	1	1
OG_10208.Heliconiini	OG_10208	Nymphalidae	sp|Q17GM7|CISY1_AEDAE	-	-	63	1303.3333333333333	237.18394174611026	1254.4761904761904	258.48636678567584	012345	0.01865200084857914	Heliconiini	2.43286689929	0.0301397677615	0.170111931444	0.850559657222
OG_10208.DioneAgraulisEueidesHeliconius	OG_10208	Nymphalidae	sp|Q17GM7|CISY1_AEDAE	-	-	63	1303.3333333333333	237.18394174611026	1254.4761904761904	258.48636678567584	012345	0.01865200084857914	DioneAgraulisEueidesHeliconius	0	1	1	1
OG_10208.Eueides	OG_10208	Nymphalidae	sp|Q17GM7|CISY1_AEDAE	-	-	63	1303.3333333333333	237.18394174611026	1254.4761904761904	258.48636678567584	012345	0.01865200084857914	Eueides	0	1	1	1
OG_10209.Heliconius	OG_10209	Nymphalidae	sp|Q962Y8|RL18_SPOFR	-	-	62	535.3064516129032	59.119231276834	521.8064516129032	65.40761490383936	012310	0.03245630332590262	Heliconius	0	1	1	1
OG_10209.EueidesHeliconius	OG_10209	Nymphalidae	sp|Q962Y8|RL18_SPOFR	-	-	62	535.3064516129032	59.119231276834	521.8064516129032	65.40761490383936	012310	0.03245630332590262	EueidesHeliconius	0.190936353233	1	1	1
OG_10209.DioneAgraulisEueidesHeliconius	OG_10209	Nymphalidae	sp|Q962Y8|RL18_SPOFR	-	-	62	535.3064516129032	59.119231276834	521.8064516129032	65.40761490383936	012310	0.03245630332590262	DioneAgraulisEueidesHeliconius	0	1	1	1
OG_10209.Eueides	OG_10209	Nymphalidae	sp|Q962Y8|RL18_SPOFR	-	-	62	535.3064516129032	59.119231276834	521.8064516129032	65.40761490383936	012310	0.03245630332590262	Eueides	0	1	1	1
OG_1021.Heliconius	OG_1021	Nymphalidae	FBgn0011286	49090	RyR	55	648.8181818181819	315.9507493788515	541.9090909090909	41.6257231342145	012345	0.1138433737043085	Heliconius	0.00524711432358	1	1	1
OG_1021.Heliconiini	OG_1021	Nymphalidae	FBgn0011286	49090	RyR	55	648.8181818181819	315.9507493788515	541.9090909090909	41.6257231342145	012345	0.1138433737043085	Heliconiini	3.127155501	0.0952748259355	0.434351225965	1
OG_1021.DioneAgraulisEueidesHeliconius	OG_1021	Nymphalidae	FBgn0011286	49090	RyR	55	648.8181818181819	315.9507493788515	541.9090909090909	41.6257231342145	012345	0.1138433737043085	DioneAgraulisEueidesHeliconius	0.405864514088	1	1	1
OG_1021.Eueides	OG_1021	Nymphalidae	FBgn0011286	49090	RyR	55	648.8181818181819	315.9507493788515	541.9090909090909	41.6257231342145	012345	0.1138433737043085	Eueides	0.0441627172539	1	1	1
OG_10216.Heliconius	OG_10216	Nymphalidae	sp|Q3SZ87|SSRG_BOVIN	-	-	59	549.3050847457627	26.53954787226046	540.457627118644	32.187123456490056	012230	0.02283731371726003	Heliconius	0	1	1	1
OG_10216.EueidesHeliconius	OG_10216	Nymphalidae	sp|Q3SZ87|SSRG_BOVIN	-	-	59	549.3050847457627	26.53954787226046	540.457627118644	32.187123456490056	012230	0.02283731371726003	EueidesHeliconius	0	1	1	1
OG_10216.Heliconiini	OG_10216	Nymphalidae	sp|Q3SZ87|SSRG_BOVIN	-	-	59	549.3050847457627	26.53954787226046	540.457627118644	32.187123456490056	012230	0.02283731371726003	Heliconiini	0	1	1	1
OG_10216.DioneAgraulisEueidesHeliconius	OG_10216	Nymphalidae	sp|Q3SZ87|SSRG_BOVIN	-	-	59	549.3050847457627	26.53954787226046	540.457627118644	32.187123456490056	012230	0.02283731371726003	DioneAgraulisEueidesHeliconius	0	1	1	1
OG_10216.Eueides	OG_10216	Nymphalidae	sp|Q3SZ87|SSRG_BOVIN	-	-	59	549.3050847457627	26.53954787226046	540.457627118644	32.187123456490056	012230	0.02283731371726003	Eueides	0	1	1	1
OG_10218.Heliconius	OG_10218	Nymphalidae	FBgn0033624	36224	CG12384	53	338.20754716981133	239.78633244215382	301.47169811320754	7.788728608882623	012345	0.06256847805819951	Heliconius	0	1	1	1
OG_10218.EueidesHeliconius	OG_10218	Nymphalidae	FBgn0033624	36224	CG12384	53	338.20754716981133	239.78633244215382	301.47169811320754	7.788728608882623	012345	0.06256847805819951	EueidesHeliconius	0.198044614088	1	1	1
OG_10218.DioneAgraulisEueidesHeliconius	OG_10218	Nymphalidae	FBgn0033624	36224	CG12384	53	338.20754716981133	239.78633244215382	301.47169811320754	7.788728608882623	012345	0.06256847805819951	DioneAgraulisEueidesHeliconius	0	1	1	1
OG_10218.Eueides	OG_10218	Nymphalidae	FBgn0033624	36224	CG12384	53	338.20754716981133	239.78633244215382	301.47169811320754	7.788728608882623	012345	0.06256847805819951	Eueides	0.0231855097401	1	1	1
OG_10222.Heliconius	OG_10222	Nymphalidae	sp|O95178|NDUB2_HUMAN	-	-	55	307.90909090909093	9.613007716389909	300.8181818181818	8.29915857529251	012345	0.1120441621732924	Heliconius	0	1	1	1
OG_10222.EueidesHeliconius	OG_10222	Nymphalidae	sp|O95178|NDUB2_HUMAN	-	-	55	307.90909090909093	9.613007716389909	300.8181818181818	8.29915857529251	012345	0.1120441621732924	EueidesHeliconius	0.739050245002	1	1	1
OG_10222.Heliconiini	OG_10222	Nymphalidae	sp|O95178|NDUB2_HUMAN	-	-	55	307.90909090909093	9.613007716389909	300.8181818181818	8.29915857529251	012345	0.1120441621732924	Heliconiini	0.400366490138	1	1	1
OG_10222.Eueides	OG_10222	Nymphalidae	sp|O95178|NDUB2_HUMAN	-	-	55	307.90909090909093	9.613007716389909	300.8181818181818	8.29915857529251	012345	0.1120441621732924	Eueides	0.0574796115609	1	1	1
OG_10224.Heliconius	OG_10224	Nymphalidae	-	47757	-	62	580.7903225806451	177.33057676197487	506.1774193548387	73.59162035781424	010020	0.1106277602233237	Heliconius	0.0393723216471	1	1	1
OG_10224.EueidesHeliconius	OG_10224	Nymphalidae	-	47757	-	62	580.7903225806451	177.33057676197487	506.1774193548387	73.59162035781424	010020	0.1106277602233237	EueidesHeliconius	10000000000	1	0.5	1
OG_10224.Heliconiini	OG_10224	Nymphalidae	-	47757	-	62	580.7903225806451	177.33057676197487	506.1774193548387	73.59162035781424	010020	0.1106277602233237	Heliconiini	69.7790349312	0.0353097904383	0.0544277094378	0.217710837751
OG_10224.Eueides	OG_10224	Nymphalidae	-	47757	-	62	580.7903225806451	177.33057676197487	506.1774193548387	73.59162035781424	010020	0.1106277602233237	Eueides	1557.69972962	0.00638808773447	0.184840829992	0.554522489975
OG_10229.Heliconius	OG_10229	Nymphalidae	sp|Q96EL3|RM53_HUMAN	-	-	60	432.4	47.38818418129144	410.9	38.50441533123182	010010	0.0881069011087304	Heliconius	0.0727009107254	1	1	1
OG_10229.EueidesHeliconius	OG_10229	Nymphalidae	sp|Q96EL3|RM53_HUMAN	-	-	60	432.4	47.38818418129144	410.9	38.50441533123182	010010	0.0881069011087304	EueidesHeliconius	0.195288031912	1	1	1
OG_10229.Heliconiini	OG_10229	Nymphalidae	sp|Q96EL3|RM53_HUMAN	-	-	60	432.4	47.38818418129144	410.9	38.50441533123182	010010	0.0881069011087304	Heliconiini	0.0177419511565	1	1	1
OG_10229.DioneAgraulisEueidesHeliconius	OG_10229	Nymphalidae	sp|Q96EL3|RM53_HUMAN	-	-	60	432.4	47.38818418129144	410.9	38.50441533123182	010010	0.0881069011087304	DioneAgraulisEueidesHeliconius	0.131986871635	1	1	1
OG_10229.Eueides	OG_10229	Nymphalidae	sp|Q96EL3|RM53_HUMAN	-	-	60	432.4	47.38818418129144	410.9	38.50441533123182	010010	0.0881069011087304	Eueides	0	1	1	1
OG_10230.Heliconius	OG_10230	Nymphalidae	sp|P80681|CUA1A_TENMO	-	-	62	1145.3225806451612	76.16657767440121	1126.258064516129	82.55241452944304	012345	0.1455229163455508	Heliconius	0.160026954779	1	1	1
OG_10230.EueidesHeliconius	OG_10230	Nymphalidae	sp|P80681|CUA1A_TENMO	-	-	62	1145.3225806451612	76.16657767440121	1126.258064516129	82.55241452944304	012345	0.1455229163455508	EueidesHeliconius	0.0121475785333	1	1	1
OG_10230.Heliconiini	OG_10230	Nymphalidae	sp|P80681|CUA1A_TENMO	-	-	62	1145.3225806451612	76.16657767440121	1126.258064516129	82.55241452944304	012345	0.1455229163455508	Heliconiini	1.06769765105	0.0874761763119	0.481761012073	1
OG_10230.DioneAgraulisEueidesHeliconius	OG_10230	Nymphalidae	sp|P80681|CUA1A_TENMO	-	-	62	1145.3225806451612	76.16657767440121	1126.258064516129	82.55241452944304	012345	0.1455229163455508	DioneAgraulisEueidesHeliconius	0.0601291225782	1	1	1
OG_10230.Eueides	OG_10230	Nymphalidae	sp|P80681|CUA1A_TENMO	-	-	62	1145.3225806451612	76.16657767440121	1126.258064516129	82.55241452944304	012345	0.1455229163455508	Eueides	0.171038156027	1	1	1
OG_10231.Heliconius	OG_10231	Heliconiinae	FBgn0016694	45588	Pdp1	51	363.6470588235294	14.012352434949873	356.1764705882353	12.71513824086978	010020	0.06815883309361774	Heliconius	0	1	1	1
OG_10231.EueidesHeliconius	OG_10231	Heliconiinae	FBgn0016694	45588	Pdp1	51	363.6470588235294	14.012352434949873	356.1764705882353	12.71513824086978	010020	0.06815883309361774	EueidesHeliconius	0.0964990881661	1	1	1
OG_10231.DioneAgraulisEueidesHeliconius	OG_10231	Heliconiinae	FBgn0016694	45588	Pdp1	51	363.6470588235294	14.012352434949873	356.1764705882353	12.71513824086978	010020	0.06815883309361774	DioneAgraulisEueidesHeliconius	0.0633680531429	1	1	1
OG_10231.Eueides	OG_10231	Heliconiinae	FBgn0016694	45588	Pdp1	51	363.6470588235294	14.012352434949873	356.1764705882353	12.71513824086978	010020	0.06815883309361774	Eueides	0.0323877566917	1	1	1
OG_10233.EueidesHeliconius	OG_10233	Heliconiinae	sp|Q9FHA6|RLF34_ARATH	-	-	54	539.2777777777778	233.950090963283	416.1111111111111	41.16078080580116	010020	0.7525077746807207	EueidesHeliconius	0.109397139566	1	1	1
OG_10233.Heliconius	OG_10233	Heliconiinae	sp|Q9FHA6|RLF34_ARATH	-	-	54	539.2777777777778	233.950090963283	416.1111111111111	41.16078080580116	010020	0.7525077746807207	Heliconius	10000000000	1	0.19790563573	0.395811271461
OG_10242.Heliconius	OG_10242	Nymphalidae	sp|Q810U5|CCD50_MOUSE	-	-	61	1271.704918032787	117.81582518633712	1250.360655737705	132.88797609164624	012345	0.063222246798674	Heliconius	0.0723717704858	1	1	1
OG_10242.EueidesHeliconius	OG_10242	Nymphalidae	sp|Q810U5|CCD50_MOUSE	-	-	61	1271.704918032787	117.81582518633712	1250.360655737705	132.88797609164624	012345	0.063222246798674	EueidesHeliconius	0	1	1	1
OG_10242.Heliconiini	OG_10242	Nymphalidae	sp|Q810U5|CCD50_MOUSE	-	-	61	1271.704918032787	117.81582518633712	1250.360655737705	132.88797609164624	012345	0.063222246798674	Heliconiini	0.0804728179597	1	1	1
OG_10242.DioneAgraulisEueidesHeliconius	OG_10242	Nymphalidae	sp|Q810U5|CCD50_MOUSE	-	-	61	1271.704918032787	117.81582518633712	1250.360655737705	132.88797609164624	012345	0.063222246798674	DioneAgraulisEueidesHeliconius	0.146551477476	1	1	1
OG_10242.Eueides	OG_10242	Nymphalidae	sp|Q810U5|CCD50_MOUSE	-	-	61	1271.704918032787	117.81582518633712	1250.360655737705	132.88797609164624	012345	0.063222246798674	Eueides	0.0715655610414	1	1	1
OG_10247.Heliconius	OG_10247	Nymphalidae	sp|Q7KMJ6|NITO_DROME	-	-	61	2211.0491803278687	492.98516674487854	2143.27868852459	316.9275725889632	012345	0.0138843855336241	Heliconius	0.0204378755054	1	1	1
OG_10247.EueidesHeliconius	OG_10247	Nymphalidae	sp|Q7KMJ6|NITO_DROME	-	-	61	2211.0491803278687	492.98516674487854	2143.27868852459	316.9275725889632	012345	0.0138843855336241	EueidesHeliconius	0.0135251401646	1	1	1
OG_10247.Heliconiini	OG_10247	Nymphalidae	sp|Q7KMJ6|NITO_DROME	-	-	61	2211.0491803278687	492.98516674487854	2143.27868852459	316.9275725889632	012345	0.0138843855336241	Heliconiini	0.516004819586	0.0443836176671	1	1
OG_10247.DioneAgraulisEueidesHeliconius	OG_10247	Nymphalidae	sp|Q7KMJ6|NITO_DROME	-	-	61	2211.0491803278687	492.98516674487854	2143.27868852459	316.9275725889632	012345	0.0138843855336241	DioneAgraulisEueidesHeliconius	0	1	1	1
OG_10247.Eueides	OG_10247	Nymphalidae	sp|Q7KMJ6|NITO_DROME	-	-	61	2211.0491803278687	492.98516674487854	2143.27868852459	316.9275725889632	012345	0.0138843855336241	Eueides	0.00630245282681	1	1	1
OG_10249.Heliconius	OG_10249	Nymphalidae	sp|P62744|AP2S1_RAT	-	-	61	416.8032786885246	36.06497764037878	411.88524590163934	41.06336501373222	012345	0.0009860959619255646	Heliconius	0	1	1	1
OG_10249.EueidesHeliconius	OG_10249	Nymphalidae	sp|P62744|AP2S1_RAT	-	-	61	416.8032786885246	36.06497764037878	411.88524590163934	41.06336501373222	012345	0.0009860959619255646	EueidesHeliconius	0	1	1	1
OG_10249.Heliconiini	OG_10249	Nymphalidae	sp|P62744|AP2S1_RAT	-	-	61	416.8032786885246	36.06497764037878	411.88524590163934	41.06336501373222	012345	0.0009860959619255646	Heliconiini	0	1	1	1
OG_10249.DioneAgraulisEueidesHeliconius	OG_10249	Nymphalidae	sp|P62744|AP2S1_RAT	-	-	61	416.8032786885246	36.06497764037878	411.88524590163934	41.06336501373222	012345	0.0009860959619255646	DioneAgraulisEueidesHeliconius	0	1	1	1
OG_10249.Eueides	OG_10249	Nymphalidae	sp|P62744|AP2S1_RAT	-	-	61	416.8032786885246	36.06497764037878	411.88524590163934	41.06336501373222	012345	0.0009860959619255646	Eueides	0	1	1	1
OG_1025.Heliconius	OG_1025	Nymphalidae	FBgn0262508	38981	CG43078	62	5051.467741935484	935.081826982519	4809.048387096775	856.5726609372613	012230	0.135091376198141	Heliconius	0.130496452334	1	1	1
OG_1025.EueidesHeliconius	OG_1025	Nymphalidae	FBgn0262508	38981	CG43078	62	5051.467741935484	935.081826982519	4809.048387096775	856.5726609372613	012230	0.135091376198141	EueidesHeliconius	0.963010406605	0.121339167465	1	1
OG_1025.Heliconiini	OG_1025	Nymphalidae	FBgn0262508	38981	CG43078	62	5051.467741935484	935.081826982519	4809.048387096775	856.5726609372613	012230	0.135091376198141	Heliconiini	24.3381319456	0.0148016417077	0.0063285987361	0.0253143949444
OG_1025.Eueides	OG_1025	Nymphalidae	FBgn0262508	38981	CG43078	62	5051.467741935484	935.081826982519	4809.048387096775	856.5726609372613	012230	0.135091376198141	Eueides	0.164254457177	1	1	1
OG_10251.Heliconius	OG_10251	Nymphalidae	FBgn0033095	35578	chk	41	1862.6341463414635	978.7202633827393	1663.0243902439024	352.0441690556621	012345	0.1181369781291881	Heliconius	0.0360513959348	1	1	1
OG_10251.EueidesHeliconius	OG_10251	Nymphalidae	FBgn0033095	35578	chk	41	1862.6341463414635	978.7202633827393	1663.0243902439024	352.0441690556621	012345	0.1181369781291881	EueidesHeliconius	0.0755932522719	1	1	1
OG_10251.Heliconiini	OG_10251	Nymphalidae	FBgn0033095	35578	chk	41	1862.6341463414635	978.7202633827393	1663.0243902439024	352.0441690556621	012345	0.1181369781291881	Heliconiini	3.12236921273	0.0302962392164	0.399541496198	1
OG_10251.Eueides	OG_10251	Nymphalidae	FBgn0033095	35578	chk	41	1862.6341463414635	978.7202633827393	1663.0243902439024	352.0441690556621	012345	0.1181369781291881	Eueides	0.131586275856	1	1	1
OG_10254.Heliconius	OG_10254	Nymphalidae	sp|Q6DRI7|DDX51_DANRE	-	-	63	1805.047619047619	197.18723908061554	1773.4285714285713	201.60488737192088	012345	0.1180337697919404	Heliconius	0.21022099684	1	1	1
OG_10254.EueidesHeliconius	OG_10254	Nymphalidae	sp|Q6DRI7|DDX51_DANRE	-	-	63	1805.047619047619	197.18723908061554	1773.4285714285713	201.60488737192088	012345	0.1180337697919404	EueidesHeliconius	0.0691587672482	1	1	1
OG_10254.Heliconiini	OG_10254	Nymphalidae	sp|Q6DRI7|DDX51_DANRE	-	-	63	1805.047619047619	197.18723908061554	1773.4285714285713	201.60488737192088	012345	0.1180337697919404	Heliconiini	1.1243659384	0.15045445711	0.49142341565	1
OG_10254.DioneAgraulisEueidesHeliconius	OG_10254	Nymphalidae	sp|Q6DRI7|DDX51_DANRE	-	-	63	1805.047619047619	197.18723908061554	1773.4285714285713	201.60488737192088	012345	0.1180337697919404	DioneAgraulisEueidesHeliconius	0.0635725926415	1	1	1
OG_10254.Eueides	OG_10254	Nymphalidae	sp|Q6DRI7|DDX51_DANRE	-	-	63	1805.047619047619	197.18723908061554	1773.4285714285713	201.60488737192088	012345	0.1180337697919404	Eueides	0.116893566235	1	1	1
OG_10258.Heliconius	OG_10258	Nymphalidae	sp|P41951|PQN25_CAEEL	-	-	58	815.948275862069	142.8102698921983	778.5	156.45118771658792	012310	0.0828543346987963	Heliconius	0.126270699797	1	1	1
OG_10258.EueidesHeliconius	OG_10258	Nymphalidae	sp|P41951|PQN25_CAEEL	-	-	58	815.948275862069	142.8102698921983	778.5	156.45118771658792	012310	0.0828543346987963	EueidesHeliconius	0.356889720175	1	1	1
OG_10258.Heliconiini	OG_10258	Nymphalidae	sp|P41951|PQN25_CAEEL	-	-	58	815.948275862069	142.8102698921983	778.5	156.45118771658792	012310	0.0828543346987963	Heliconiini	0.0406114266511	1	1	1
OG_10258.DioneAgraulisEueidesHeliconius	OG_10258	Nymphalidae	sp|P41951|PQN25_CAEEL	-	-	58	815.948275862069	142.8102698921983	778.5	156.45118771658792	012310	0.0828543346987963	DioneAgraulisEueidesHeliconius	0.0799229869373	1	1	1
OG_10258.Eueides	OG_10258	Nymphalidae	sp|P41951|PQN25_CAEEL	-	-	58	815.948275862069	142.8102698921983	778.5	156.45118771658792	012310	0.0828543346987963	Eueides	0.521292722756	1	1	1
OG_10259.Heliconius	OG_10259	Nymphalidae	sp|Q2G222|Y2979_STAA8	-	-	63	2532.4761904761904	480.5140718466322	2373.904761904762	498.9940265662033	012345	0.2235762799280721	Heliconius	0.16148793681	1	1	1
OG_10259.EueidesHeliconius	OG_10259	Nymphalidae	sp|Q2G222|Y2979_STAA8	-	-	63	2532.4761904761904	480.5140718466322	2373.904761904762	498.9940265662033	012345	0.2235762799280721	EueidesHeliconius	0.187624813638	1	1	1
OG_10259.Heliconiini	OG_10259	Nymphalidae	sp|Q2G222|Y2979_STAA8	-	-	63	2532.4761904761904	480.5140718466322	2373.904761904762	498.9940265662033	012345	0.2235762799280721	Heliconiini	1.5994611754	0.113314325475	0.398046928406	1
OG_10259.DioneAgraulisEueidesHeliconius	OG_10259	Nymphalidae	sp|Q2G222|Y2979_STAA8	-	-	63	2532.4761904761904	480.5140718466322	2373.904761904762	498.9940265662033	012345	0.2235762799280721	DioneAgraulisEueidesHeliconius	32.3726379883	0.00646893473697	0.058328060018	0.29164030009
OG_10259.Eueides	OG_10259	Nymphalidae	sp|Q2G222|Y2979_STAA8	-	-	63	2532.4761904761904	480.5140718466322	2373.904761904762	498.9940265662033	012345	0.2235762799280721	Eueides	0.229372585077	1	1	1
OG_10260.Heliconius	OG_10260	Nymphalidae	sp|Q9UBG0|MRC2_HUMAN	-	-	61	860.8524590163935	164.26506329266553	787.4754098360655	154.34808506274692	012345	0.252953408927578	Heliconius	0.084522559041	1	1	1
OG_10260.EueidesHeliconius	OG_10260	Nymphalidae	sp|Q9UBG0|MRC2_HUMAN	-	-	61	860.8524590163935	164.26506329266553	787.4754098360655	154.34808506274692	012345	0.252953408927578	EueidesHeliconius	7.0372128508	0.0501424074897	0.0397828535089	0.159131414036
OG_10260.Heliconiini	OG_10260	Nymphalidae	sp|Q9UBG0|MRC2_HUMAN	-	-	61	860.8524590163935	164.26506329266553	787.4754098360655	154.34808506274692	012345	0.252953408927578	Heliconiini	15.7685421504	0.0229933207467	0.287502570995	0.862507712985
OG_10260.Eueides	OG_10260	Nymphalidae	sp|Q9UBG0|MRC2_HUMAN	-	-	61	860.8524590163935	164.26506329266553	787.4754098360655	154.34808506274692	012345	0.252953408927578	Eueides	0.340111761804	1	1	1
OG_10261.Heliconius	OG_10261	Nymphalidae	FBgn0032231	34406	CG5056	59	643.9830508474577	74.25208814627479	605.3898305084746	18.04891371833636	012345	0.1486507863319445	Heliconius	0.0877499232689	1	1	1
OG_10261.EueidesHeliconius	OG_10261	Nymphalidae	FBgn0032231	34406	CG5056	59	643.9830508474577	74.25208814627479	605.3898305084746	18.04891371833636	012345	0.1486507863319445	EueidesHeliconius	0.168370142684	1	1	1
OG_10261.Heliconiini	OG_10261	Nymphalidae	FBgn0032231	34406	CG5056	59	643.9830508474577	74.25208814627479	605.3898305084746	18.04891371833636	012345	0.1486507863319445	Heliconiini	0.0795536740503	1	1	1
OG_10261.Eueides	OG_10261	Nymphalidae	FBgn0032231	34406	CG5056	59	643.9830508474577	74.25208814627479	605.3898305084746	18.04891371833636	012345	0.1486507863319445	Eueides	0.0285780792775	1	1	1
OG_10262.Heliconius	OG_10262	Nymphalidae	sp|Q942L2|PDI22_ORYSJ	-	-	62	911.4193548387096	131.31070619288468	875.1290322580645	146.4602207218813	012345	0.06932140930991461	Heliconius	0.0884605264841	1	1	1
OG_10262.EueidesHeliconius	OG_10262	Nymphalidae	sp|Q942L2|PDI22_ORYSJ	-	-	62	911.4193548387096	131.31070619288468	875.1290322580645	146.4602207218813	012345	0.06932140930991461	EueidesHeliconius	0.0439600670125	1	1	1
OG_10262.Heliconiini	OG_10262	Nymphalidae	sp|Q942L2|PDI22_ORYSJ	-	-	62	911.4193548387096	131.31070619288468	875.1290322580645	146.4602207218813	012345	0.06932140930991461	Heliconiini	20.0032881369	0.00855949661334	0.153378411519	0.766892057597
OG_10262.DioneAgraulisEueidesHeliconius	OG_10262	Nymphalidae	sp|Q942L2|PDI22_ORYSJ	-	-	62	911.4193548387096	131.31070619288468	875.1290322580645	146.4602207218813	012345	0.06932140930991461	DioneAgraulisEueidesHeliconius	0.287103493849	1	1	1
OG_10262.Eueides	OG_10262	Nymphalidae	sp|Q942L2|PDI22_ORYSJ	-	-	62	911.4193548387096	131.31070619288468	875.1290322580645	146.4602207218813	012345	0.06932140930991461	Eueides	10000000000	1	0.37449771161	1
OG_10265.Heliconius	OG_10265	Nymphalidae	sp|O93567|ZBT7A_CHICK	-	-	63	1422.1904761904761	253.73882692691996	1194.904761904762	178.9306608882214	012345	0.04835315933073248	Heliconius	233.656923779	0.0061539067906	0.00193740043699	0.00774960174796
OG_10265.EueidesHeliconius	OG_10265	Nymphalidae	sp|O93567|ZBT7A_CHICK	-	-	63	1422.1904761904761	253.73882692691996	1194.904761904762	178.9306608882214	012345	0.04835315933073248	EueidesHeliconius	157.680125912	0.00297931660448	0.0104201004045	0.0312603012136
OG_10265.Heliconiini	OG_10265	Nymphalidae	sp|O93567|ZBT7A_CHICK	-	-	63	1422.1904761904761	253.73882692691996	1194.904761904762	178.9306608882214	012345	0.04835315933073248	Heliconiini	2.74785521842	0.0328657785962	0.301328597451	0.602657194903
OG_10265.DioneAgraulisEueidesHeliconius	OG_10265	Nymphalidae	sp|O93567|ZBT7A_CHICK	-	-	63	1422.1904761904761	253.73882692691996	1194.904761904762	178.9306608882214	012345	0.04835315933073248	DioneAgraulisEueidesHeliconius	209.867898551	0.0108793133291	0.000994241609605	0.00497120804802
OG_10265.Eueides	OG_10265	Nymphalidae	sp|O93567|ZBT7A_CHICK	-	-	63	1422.1904761904761	253.73882692691996	1194.904761904762	178.9306608882214	012345	0.04835315933073248	Eueides	0.0863125925131	1	1	1
OG_10267.Heliconius	OG_10267	Nymphalidae	FBgn0037611	41031	CG11755	51	413.5882352941176	356.67039634135267	323.0	4.47213595499958	012345	0.1426680621910637	Heliconius	10000000000	1	0.408658244979	1
OG_10267.EueidesHeliconius	OG_10267	Nymphalidae	FBgn0037611	41031	CG11755	51	413.5882352941176	356.67039634135267	323.0	4.47213595499958	012345	0.1426680621910637	EueidesHeliconius	0.188211773097	1	1	1
OG_10267.Heliconiini	OG_10267	Nymphalidae	FBgn0037611	41031	CG11755	51	413.5882352941176	356.67039634135267	323.0	4.47213595499958	012345	0.1426680621910637	Heliconiini	0.130453491696	1	1	1
OG_10267.DioneAgraulisEueidesHeliconius	OG_10267	Nymphalidae	FBgn0037611	41031	CG11755	51	413.5882352941176	356.67039634135267	323.0	4.47213595499958	012345	0.1426680621910637	DioneAgraulisEueidesHeliconius	0	1	1	1
OG_10267.Eueides	OG_10267	Nymphalidae	FBgn0037611	41031	CG11755	51	413.5882352941176	356.67039634135267	323.0	4.47213595499958	012345	0.1426680621910637	Eueides	0.0994321136536	1	1	1
OG_10269.Heliconius	OG_10269	Nymphalidae	sp|O46382|BIG1_BOVIN	-	-	62	4870.548387096775	769.0544818449378	4843.693548387097	772.521961034738	012345	0.02312649868678423	Heliconius	0.00840548327402	1	1	1
OG_10269.EueidesHeliconius	OG_10269	Nymphalidae	sp|O46382|BIG1_BOVIN	-	-	62	4870.548387096775	769.0544818449378	4843.693548387097	772.521961034738	012345	0.02312649868678423	EueidesHeliconius	501.021618331	0.000713410247714	0.00390065795724	0.0195032897862
OG_10269.Heliconiini	OG_10269	Nymphalidae	sp|O46382|BIG1_BOVIN	-	-	62	4870.548387096775	769.0544818449378	4843.693548387097	772.521961034738	012345	0.02312649868678423	Heliconiini	3.94570701928	0.00303356780649	0.138880169938	0.555520679753
OG_10269.DioneAgraulisEueidesHeliconius	OG_10269	Nymphalidae	sp|O46382|BIG1_BOVIN	-	-	62	4870.548387096775	769.0544818449378	4843.693548387097	772.521961034738	012345	0.02312649868678423	DioneAgraulisEueidesHeliconius	0.00658833878867	1	1	1
OG_10269.Eueides	OG_10269	Nymphalidae	sp|O46382|BIG1_BOVIN	-	-	62	4870.548387096775	769.0544818449378	4843.693548387097	772.521961034738	012345	0.02312649868678423	Eueides	1.22004755925	0.0217652216555	0.484969680948	1
OG_10274.Heliconius	OG_10274	Nymphalidae	FBgn0032635	35044	CG15141	62	2081.6129032258063	269.08742762246345	1929.8225806451612	338.57717108576156	012345	0.2232563325569324	Heliconius	2.21972038138	0.117383289423	0.16110762883	0.805538144151
OG_10274.EueidesHeliconius	OG_10274	Nymphalidae	FBgn0032635	35044	CG15141	62	2081.6129032258063	269.08742762246345	1929.8225806451612	338.57717108576156	012345	0.2232563325569324	EueidesHeliconius	2.32032672159	0.101360038218	0.21445844869	0.85783379476
OG_10274.Heliconiini	OG_10274	Nymphalidae	FBgn0032635	35044	CG15141	62	2081.6129032258063	269.08742762246345	1929.8225806451612	338.57717108576156	012345	0.2232563325569324	Heliconiini	0.0696744206666	1	1	1
OG_10274.DioneAgraulisEueidesHeliconius	OG_10274	Nymphalidae	FBgn0032635	35044	CG15141	62	2081.6129032258063	269.08742762246345	1929.8225806451612	338.57717108576156	012345	0.2232563325569324	DioneAgraulisEueidesHeliconius	0.144226943034	1	1	1
OG_10274.Eueides	OG_10274	Nymphalidae	FBgn0032635	35044	CG15141	62	2081.6129032258063	269.08742762246345	1929.8225806451612	338.57717108576156	012345	0.2232563325569324	Eueides	0.24258584792	1	1	1
OG_10275.Heliconius	OG_10275	Nymphalidae	sp|Q9GPH3|ATFC_BOMMO	-	-	57	977.1578947368421	252.80245317719914	835.7368421052631	161.86051243204608	012345	0.12093303119317	Heliconius	27.5502634238	0.017916060286	0.0295708157198	0.0591416314396
OG_10275.EueidesHeliconius	OG_10275	Nymphalidae	sp|Q9GPH3|ATFC_BOMMO	-	-	57	977.1578947368421	252.80245317719914	835.7368421052631	161.86051243204608	012345	0.12093303119317	EueidesHeliconius	62.8194489546	0.0200172857749	0.00182944163908	0.00548832491724
OG_10275.Eueides	OG_10275	Nymphalidae	sp|Q9GPH3|ATFC_BOMMO	-	-	57	977.1578947368421	252.80245317719914	835.7368421052631	161.86051243204608	012345	0.12093303119317	Eueides	0.16556599032	1	1	1
OG_1028.Heliconius	OG_1028	Nymphalidae	FBgn0010044	48341	GstD8	58	778.1379310344828	396.5634031263698	664.448275862069	80.69336861481654	012345	0.2248144586764101	Heliconius	0.207093830589	1	1	1
OG_1028.EueidesHeliconius	OG_1028	Nymphalidae	FBgn0010044	48341	GstD8	58	778.1379310344828	396.5634031263698	664.448275862069	80.69336861481654	012345	0.2248144586764101	EueidesHeliconius	0.447123983256	1	1	1
OG_1028.Heliconiini	OG_1028	Nymphalidae	FBgn0010044	48341	GstD8	58	778.1379310344828	396.5634031263698	664.448275862069	80.69336861481654	012345	0.2248144586764101	Heliconiini	3.67510138767	0.0831439712487	0.257503696894	1
OG_1028.DioneAgraulisEueidesHeliconius	OG_1028	Nymphalidae	FBgn0010044	48341	GstD8	58	778.1379310344828	396.5634031263698	664.448275862069	80.69336861481654	012345	0.2248144586764101	DioneAgraulisEueidesHeliconius	0.127542878763	1	1	1
OG_1028.Eueides	OG_1028	Nymphalidae	FBgn0010044	48341	GstD8	58	778.1379310344828	396.5634031263698	664.448275862069	80.69336861481654	012345	0.2248144586764101	Eueides	0.147990755582	1	1	1
OG_10281.Heliconius	OG_10281	Nymphalidae	FBgn0028494	37012	CG6424	62	1604.516129032258	387.9729680446857	1428.4354838709678	326.2577459699785	012345	0.06953345089353116	Heliconius	0.0649816366598	1	1	1
OG_10281.EueidesHeliconius	OG_10281	Nymphalidae	FBgn0028494	37012	CG6424	62	1604.516129032258	387.9729680446857	1428.4354838709678	326.2577459699785	012345	0.06953345089353116	EueidesHeliconius	0.0247351825575	1	1	1
OG_10281.Heliconiini	OG_10281	Nymphalidae	FBgn0028494	37012	CG6424	62	1604.516129032258	387.9729680446857	1428.4354838709678	326.2577459699785	012345	0.06953345089353116	Heliconiini	0.0439033041806	1	1	1
OG_10281.DioneAgraulisEueidesHeliconius	OG_10281	Nymphalidae	FBgn0028494	37012	CG6424	62	1604.516129032258	387.9729680446857	1428.4354838709678	326.2577459699785	012345	0.06953345089353116	DioneAgraulisEueidesHeliconius	0.0505904807821	1	1	1
OG_10281.Eueides	OG_10281	Nymphalidae	FBgn0028494	37012	CG6424	62	1604.516129032258	387.9729680446857	1428.4354838709678	326.2577459699785	012345	0.06953345089353116	Eueides	0.0188755466419	1	1	1
OG_10283.Heliconius	OG_10283	Nymphalidae	FBgn0032644	35057	CG5131	61	716.311475409836	122.52032832114647	691.4754098360655	134.04704417129662	012345	0.07110333713490775	Heliconius	0.0839466089951	1	1	1
OG_10283.EueidesHeliconius	OG_10283	Nymphalidae	FBgn0032644	35057	CG5131	61	716.311475409836	122.52032832114647	691.4754098360655	134.04704417129662	012345	0.07110333713490775	EueidesHeliconius	0.0357369740243	1	1	1
OG_10283.Heliconiini	OG_10283	Nymphalidae	FBgn0032644	35057	CG5131	61	716.311475409836	122.52032832114647	691.4754098360655	134.04704417129662	012345	0.07110333713490775	Heliconiini	0.0401546316088	1	1	1
OG_10283.DioneAgraulisEueidesHeliconius	OG_10283	Nymphalidae	FBgn0032644	35057	CG5131	61	716.311475409836	122.52032832114647	691.4754098360655	134.04704417129662	012345	0.07110333713490775	DioneAgraulisEueidesHeliconius	0.0261915965108	1	1	1
OG_10283.Eueides	OG_10283	Nymphalidae	FBgn0032644	35057	CG5131	61	716.311475409836	122.52032832114647	691.4754098360655	134.04704417129662	012345	0.07110333713490775	Eueides	0	1	1	1
OG_10284.Heliconius	OG_10284	Nymphalidae	sp|Q61502|E2F5_MOUSE	-	-	62	745.0645161290323	77.12053217419071	734.1774193548387	80.06298411624647	012345	0.1098029698674882	Heliconius	0.273424097256	1	1	1
OG_10284.EueidesHeliconius	OG_10284	Nymphalidae	sp|Q61502|E2F5_MOUSE	-	-	62	745.0645161290323	77.12053217419071	734.1774193548387	80.06298411624647	012345	0.1098029698674882	EueidesHeliconius	0.115567016945	1	1	1
OG_10284.Heliconiini	OG_10284	Nymphalidae	sp|Q61502|E2F5_MOUSE	-	-	62	745.0645161290323	77.12053217419071	734.1774193548387	80.06298411624647	012345	0.1098029698674882	Heliconiini	0.125038104927	1	1	1
OG_10284.Eueides	OG_10284	Nymphalidae	sp|Q61502|E2F5_MOUSE	-	-	62	745.0645161290323	77.12053217419071	734.1774193548387	80.06298411624647	012345	0.1098029698674882	Eueides	0.128787382115	1	1	1
OG_10286.Heliconius	OG_10286	Nymphalidae	sp|Q9M8Y0|SEC_ARATH	-	-	62	1064.3225806451612	158.012226373983	1039.016129032258	163.6767557871783	012230	0.04946888200064831	Heliconius	0	1	1	1
OG_10286.EueidesHeliconius	OG_10286	Nymphalidae	sp|Q9M8Y0|SEC_ARATH	-	-	62	1064.3225806451612	158.012226373983	1039.016129032258	163.6767557871783	012230	0.04946888200064831	EueidesHeliconius	0.0391631033463	1	1	1
OG_10286.Heliconiini	OG_10286	Nymphalidae	sp|Q9M8Y0|SEC_ARATH	-	-	62	1064.3225806451612	158.012226373983	1039.016129032258	163.6767557871783	012230	0.04946888200064831	Heliconiini	0.0206219455262	1	1	1
OG_10286.DioneAgraulisEueidesHeliconius	OG_10286	Nymphalidae	sp|Q9M8Y0|SEC_ARATH	-	-	62	1064.3225806451612	158.012226373983	1039.016129032258	163.6767557871783	012230	0.04946888200064831	DioneAgraulisEueidesHeliconius	0.0604184369467	1	1	1
OG_10286.Eueides	OG_10286	Nymphalidae	sp|Q9M8Y0|SEC_ARATH	-	-	62	1064.3225806451612	158.012226373983	1039.016129032258	163.6767557871783	012230	0.04946888200064831	Eueides	6.96024899936	0.00744669744447	0.133371630256	0.666858151279
OG_10290.Heliconius	OG_10290	Nymphalidae	FBgn0264810	34845	Pburs	61	495.4918032786885	252.9374718915964	402.4918032786885	27.21054698531415	012345	0.0903575508017659	Heliconius	0	1	1	1
OG_10290.EueidesHeliconius	OG_10290	Nymphalidae	FBgn0264810	34845	Pburs	61	495.4918032786885	252.9374718915964	402.4918032786885	27.21054698531415	012345	0.0903575508017659	EueidesHeliconius	0	1	1	1
OG_10290.Heliconiini	OG_10290	Nymphalidae	FBgn0264810	34845	Pburs	61	495.4918032786885	252.9374718915964	402.4918032786885	27.21054698531415	012345	0.0903575508017659	Heliconiini	0.0961824804883	1	1	1
OG_10290.Eueides	OG_10290	Nymphalidae	FBgn0264810	34845	Pburs	61	495.4918032786885	252.9374718915964	402.4918032786885	27.21054698531415	012345	0.0903575508017659	Eueides	50.1333042513	0.00881424835114	0.058899981665	0.23559992666
OG_10291.Heliconiini	OG_10291	Nymphalidae	FBgn0038901	42560	Burs	53	496.8679245283019	273.00915996353365	382.75471698113205	41.76253880646397	010020	0.06463441572527104	Heliconiini	0.0413235088353	1	1	1
OG_10291.Eueides	OG_10291	Nymphalidae	FBgn0038901	42560	Burs	53	496.8679245283019	273.00915996353365	382.75471698113205	41.76253880646397	010020	0.06463441572527104	Eueides	0	1	1	1
OG_10294.Heliconius	OG_10294	Nymphalidae	sp|P41732|TSN7_HUMAN	-	-	62	770.7096774193549	141.83013318946402	705.1451612903226	119.37226224176167	012230	0.07515689997765869	Heliconius	0.0528989706915	1	1	1
OG_10294.EueidesHeliconius	OG_10294	Nymphalidae	sp|P41732|TSN7_HUMAN	-	-	62	770.7096774193549	141.83013318946402	705.1451612903226	119.37226224176167	012230	0.07515689997765869	EueidesHeliconius	0	1	1	1
OG_10294.Heliconiini	OG_10294	Nymphalidae	sp|P41732|TSN7_HUMAN	-	-	62	770.7096774193549	141.83013318946402	705.1451612903226	119.37226224176167	012230	0.07515689997765869	Heliconiini	0.15771031214	1	1	1
OG_10294.Eueides	OG_10294	Nymphalidae	sp|P41732|TSN7_HUMAN	-	-	62	770.7096774193549	141.83013318946402	705.1451612903226	119.37226224176167	012230	0.07515689997765869	Eueides	0.0495094447007	1	1	1
OG_10295.Heliconius	OG_10295	Nymphalidae	FBgn0032943	35405	Tsp39D	60	804.55	128.98661752290428	696.1	97.27276083261953	012310	0.112112164839906	Heliconius	0	1	1	1
OG_10295.EueidesHeliconius	OG_10295	Nymphalidae	FBgn0032943	35405	Tsp39D	60	804.55	128.98661752290428	696.1	97.27276083261953	012310	0.112112164839906	EueidesHeliconius	0.145440013986	1	1	1
OG_10295.Heliconiini	OG_10295	Nymphalidae	FBgn0032943	35405	Tsp39D	60	804.55	128.98661752290428	696.1	97.27276083261953	012310	0.112112164839906	Heliconiini	9090.0	0.0159412318963	0.0634160945299	0.31708047265
OG_10295.DioneAgraulisEueidesHeliconius	OG_10295	Nymphalidae	FBgn0032943	35405	Tsp39D	60	804.55	128.98661752290428	696.1	97.27276083261953	012310	0.112112164839906	DioneAgraulisEueidesHeliconius	10000000000	1	0.458559491947	1
OG_10295.Eueides	OG_10295	Nymphalidae	FBgn0032943	35405	Tsp39D	60	804.55	128.98661752290428	696.1	97.27276083261953	012310	0.112112164839906	Eueides	0.0438419383284	1	1	1
OG_10296.Heliconius	OG_10296	Nymphalidae	sp|P38293|UMP1_YEAST	-	-	62	417.0967741935484	38.81332896986814	406.7903225806452	44.48237675564814	012345	0.05753953186080158	Heliconius	0.0898879213586	1	1	1
OG_10296.EueidesHeliconius	OG_10296	Nymphalidae	sp|P38293|UMP1_YEAST	-	-	62	417.0967741935484	38.81332896986814	406.7903225806452	44.48237675564814	012345	0.05753953186080158	EueidesHeliconius	0.0631437959793	1	1	1
OG_10296.Heliconiini	OG_10296	Nymphalidae	sp|P38293|UMP1_YEAST	-	-	62	417.0967741935484	38.81332896986814	406.7903225806452	44.48237675564814	012345	0.05753953186080158	Heliconiini	0.117233744309	1	1	1
OG_10296.DioneAgraulisEueidesHeliconius	OG_10296	Nymphalidae	sp|P38293|UMP1_YEAST	-	-	62	417.0967741935484	38.81332896986814	406.7903225806452	44.48237675564814	012345	0.05753953186080158	DioneAgraulisEueidesHeliconius	0	1	1	1
OG_10296.Eueides	OG_10296	Nymphalidae	sp|P38293|UMP1_YEAST	-	-	62	417.0967741935484	38.81332896986814	406.7903225806452	44.48237675564814	012345	0.05753953186080158	Eueides	0.0438780922303	1	1	1
OG_10297.Heliconius	OG_10297	Nymphalidae	sp|O32239|YVAQ_BACSU	-	-	57	411.10526315789474	39.424671325722855	402.10526315789474	28.06363958997498	012345	0.09078959398649779	Heliconius	0.0172846376828	1	1	1
OG_10297.EueidesHeliconius	OG_10297	Nymphalidae	sp|O32239|YVAQ_BACSU	-	-	57	411.10526315789474	39.424671325722855	402.10526315789474	28.06363958997498	012345	0.09078959398649779	EueidesHeliconius	0.0663806099302	1	1	1
OG_10297.Heliconiini	OG_10297	Nymphalidae	sp|O32239|YVAQ_BACSU	-	-	57	411.10526315789474	39.424671325722855	402.10526315789474	28.06363958997498	012345	0.09078959398649779	Heliconiini	0.11300797853	1	1	1
OG_10297.Eueides	OG_10297	Nymphalidae	sp|O32239|YVAQ_BACSU	-	-	57	411.10526315789474	39.424671325722855	402.10526315789474	28.06363958997498	012345	0.09078959398649779	Eueides	0.0387807804128	1	1	1
OG_10301.Heliconius	OG_10301	Nymphalidae	FBgn0040028	318227	CG17450	63	1183.4285714285713	242.6536962968638	1159.047619047619	203.4166440234418	012345	0.05885985700277423	Heliconius	0.0220741602407	1	1	1
OG_10301.EueidesHeliconius	OG_10301	Nymphalidae	FBgn0040028	318227	CG17450	63	1183.4285714285713	242.6536962968638	1159.047619047619	203.4166440234418	012345	0.05885985700277423	EueidesHeliconius	0.0261176717632	1	1	1
OG_10301.Heliconiini	OG_10301	Nymphalidae	FBgn0040028	318227	CG17450	63	1183.4285714285713	242.6536962968638	1159.047619047619	203.4166440234418	012345	0.05885985700277423	Heliconiini	0.0317683542388	1	1	1
OG_10301.DioneAgraulisEueidesHeliconius	OG_10301	Nymphalidae	FBgn0040028	318227	CG17450	63	1183.4285714285713	242.6536962968638	1159.047619047619	203.4166440234418	012345	0.05885985700277423	DioneAgraulisEueidesHeliconius	0.0393401178201	1	1	1
OG_10301.Eueides	OG_10301	Nymphalidae	FBgn0040028	318227	CG17450	63	1183.4285714285713	242.6536962968638	1159.047619047619	203.4166440234418	012345	0.05885985700277423	Eueides	0.0183332527094	1	1	1
OG_10307.Heliconius	OG_10307	Nymphalidae	sp|Q8TF66|LRC15_HUMAN	-	-	61	1294.2295081967213	277.84312081641326	1272.9344262295083	284.5160901181973	012230	0.1141681177030382	Heliconius	0.0828820519633	1	1	1
OG_10307.EueidesHeliconius	OG_10307	Nymphalidae	sp|Q8TF66|LRC15_HUMAN	-	-	61	1294.2295081967213	277.84312081641326	1272.9344262295083	284.5160901181973	012230	0.1141681177030382	EueidesHeliconius	0.106218359602	1	1	1
OG_10307.Heliconiini	OG_10307	Nymphalidae	sp|Q8TF66|LRC15_HUMAN	-	-	61	1294.2295081967213	277.84312081641326	1272.9344262295083	284.5160901181973	012230	0.1141681177030382	Heliconiini	0.0429773374415	1	1	1
OG_10307.DioneAgraulisEueidesHeliconius	OG_10307	Nymphalidae	sp|Q8TF66|LRC15_HUMAN	-	-	61	1294.2295081967213	277.84312081641326	1272.9344262295083	284.5160901181973	012230	0.1141681177030382	DioneAgraulisEueidesHeliconius	0.123129922342	1	1	1
OG_10307.Eueides	OG_10307	Nymphalidae	sp|Q8TF66|LRC15_HUMAN	-	-	61	1294.2295081967213	277.84312081641326	1272.9344262295083	284.5160901181973	012230	0.1141681177030382	Eueides	0.0814637807176	1	1	1
OG_10308.Heliconius	OG_10308	Nymphalidae	sp|Q95SS8|TMM70_DROME	-	-	58	628.551724137931	52.426030785516275	611.6379310344828	63.829702921365126	012210	0.1200501246736956	Heliconius	0.182423768876	1	1	1
OG_10308.EueidesHeliconius	OG_10308	Nymphalidae	sp|Q95SS8|TMM70_DROME	-	-	58	628.551724137931	52.426030785516275	611.6379310344828	63.829702921365126	012210	0.1200501246736956	EueidesHeliconius	0.0185290282051	1	1	1
OG_10308.Heliconiini	OG_10308	Nymphalidae	sp|Q95SS8|TMM70_DROME	-	-	58	628.551724137931	52.426030785516275	611.6379310344828	63.829702921365126	012210	0.1200501246736956	Heliconiini	0.0977424108501	1	1	1
OG_10308.Eueides	OG_10308	Nymphalidae	sp|Q95SS8|TMM70_DROME	-	-	58	628.551724137931	52.426030785516275	611.6379310344828	63.829702921365126	012210	0.1200501246736956	Eueides	0.0537761737982	1	1	1
OG_10311.EueidesHeliconius	OG_10311	Nymphalidae	sp|Q96IG2|FXL20_HUMAN	-	-	61	1528.4262295081967	167.96276509855952	1504.5245901639344	176.71145384471828	012345	0.07284448383603177	EueidesHeliconius	0.0795218324491	1	1	1
OG_10311.Heliconiini	OG_10311	Nymphalidae	sp|Q96IG2|FXL20_HUMAN	-	-	61	1528.4262295081967	167.96276509855952	1504.5245901639344	176.71145384471828	012345	0.07284448383603177	Heliconiini	0.0142740664651	1	1	1
OG_10311.DioneAgraulisEueidesHeliconius	OG_10311	Nymphalidae	sp|Q96IG2|FXL20_HUMAN	-	-	61	1528.4262295081967	167.96276509855952	1504.5245901639344	176.71145384471828	012345	0.07284448383603177	DioneAgraulisEueidesHeliconius	0.00772559926988	1	1	1
OG_10311.Eueides	OG_10311	Nymphalidae	sp|Q96IG2|FXL20_HUMAN	-	-	61	1528.4262295081967	167.96276509855952	1504.5245901639344	176.71145384471828	012345	0.07284448383603177	Eueides	0.0589208238522	1	1	1
OG_10312.Heliconius	OG_10312	Nymphalidae	sp|Q6NN40|NTM1_DROME	-	-	57	674.5263157894736	49.85491415471459	644.4736842105264	30.51206563942349	012345	0.08090070492011749	Heliconius	10000000000	1	0.247693735797	1
OG_10312.EueidesHeliconius	OG_10312	Nymphalidae	sp|Q6NN40|NTM1_DROME	-	-	57	674.5263157894736	49.85491415471459	644.4736842105264	30.51206563942349	012345	0.08090070492011749	EueidesHeliconius	0.124228598039	1	1	1
OG_10312.Heliconiini	OG_10312	Nymphalidae	sp|Q6NN40|NTM1_DROME	-	-	57	674.5263157894736	49.85491415471459	644.4736842105264	30.51206563942349	012345	0.08090070492011749	Heliconiini	3846.11664963	0.0157221513808	0.293250518758	1
OG_10312.DioneAgraulisEueidesHeliconius	OG_10312	Nymphalidae	sp|Q6NN40|NTM1_DROME	-	-	57	674.5263157894736	49.85491415471459	644.4736842105264	30.51206563942349	012345	0.08090070492011749	DioneAgraulisEueidesHeliconius	0.0389694627061	1	1	1
OG_10312.Eueides	OG_10312	Nymphalidae	sp|Q6NN40|NTM1_DROME	-	-	57	674.5263157894736	49.85491415471459	644.4736842105264	30.51206563942349	012345	0.08090070492011749	Eueides	0.0557886870317	1	1	1
OG_10320.Heliconius	OG_10320	Nymphalidae	FBgn0031725	33793	DIP-eta	58	1033.2413793103449	231.94390748365683	981.1551724137931	211.15354780137653	012345	0.05407678815741363	Heliconius	0.0125368476793	1	1	1
OG_10320.EueidesHeliconius	OG_10320	Nymphalidae	FBgn0031725	33793	DIP-eta	58	1033.2413793103449	231.94390748365683	981.1551724137931	211.15354780137653	012345	0.05407678815741363	EueidesHeliconius	0.0478251399077	1	1	1
OG_10320.Heliconiini	OG_10320	Nymphalidae	FBgn0031725	33793	DIP-eta	58	1033.2413793103449	231.94390748365683	981.1551724137931	211.15354780137653	012345	0.05407678815741363	Heliconiini	0.0354370700296	1	1	1
OG_10320.DioneAgraulisEueidesHeliconius	OG_10320	Nymphalidae	FBgn0031725	33793	DIP-eta	58	1033.2413793103449	231.94390748365683	981.1551724137931	211.15354780137653	012345	0.05407678815741363	DioneAgraulisEueidesHeliconius	0	1	1	1
OG_10320.Eueides	OG_10320	Nymphalidae	FBgn0031725	33793	DIP-eta	58	1033.2413793103449	231.94390748365683	981.1551724137931	211.15354780137653	012345	0.05407678815741363	Eueides	0.0237706460945	1	1	1
OG_10321.EueidesHeliconius	OG_10321	Nymphalidae	sp|Q293F6|SSRP1_DROPS	-	-	59	623.7966101694915	51.85239142974628	598.0677966101695	52.23021542765882	012230	0.1891697720185444	EueidesHeliconius	0	1	1	1
OG_10321.Eueides	OG_10321	Nymphalidae	sp|Q293F6|SSRP1_DROPS	-	-	59	623.7966101694915	51.85239142974628	598.0677966101695	52.23021542765882	012230	0.1891697720185444	Eueides	0.34017978097	1	1	1
OG_10322.Heliconius	OG_10322	Nymphalidae	sp|Q9H845|ACAD9_HUMAN	-	-	62	1636.741935483871	392.8457768265397	1590.0	398.231615212603	012345	0.1281540285153946	Heliconius	0.059765602547	1	1	1
OG_10322.EueidesHeliconius	OG_10322	Nymphalidae	sp|Q9H845|ACAD9_HUMAN	-	-	62	1636.741935483871	392.8457768265397	1590.0	398.231615212603	012345	0.1281540285153946	EueidesHeliconius	0.10452707331	1	1	1
OG_10322.Heliconiini	OG_10322	Nymphalidae	sp|Q9H845|ACAD9_HUMAN	-	-	62	1636.741935483871	392.8457768265397	1590.0	398.231615212603	012345	0.1281540285153946	Heliconiini	1.17003334147	0.157443184643	0.465229786699	1
OG_10322.DioneAgraulisEueidesHeliconius	OG_10322	Nymphalidae	sp|Q9H845|ACAD9_HUMAN	-	-	62	1636.741935483871	392.8457768265397	1590.0	398.231615212603	012345	0.1281540285153946	DioneAgraulisEueidesHeliconius	0.0348944856435	1	1	1
OG_10322.Eueides	OG_10322	Nymphalidae	sp|Q9H845|ACAD9_HUMAN	-	-	62	1636.741935483871	392.8457768265397	1590.0	398.231615212603	012345	0.1281540285153946	Eueides	0.105439044931	1	1	1
OG_10323.Heliconius	OG_10323	Nymphalidae	sp|P91664|MAX_DROME	-	-	60	521.6	104.00307687756167	475.15	56.08500245163586	012345	0.02490910556516268	Heliconius	0.0234447717987	1	1	1
OG_10323.EueidesHeliconius	OG_10323	Nymphalidae	sp|P91664|MAX_DROME	-	-	60	521.6	104.00307687756167	475.15	56.08500245163586	012345	0.02490910556516268	EueidesHeliconius	0	1	1	1
OG_10323.Heliconiini	OG_10323	Nymphalidae	sp|P91664|MAX_DROME	-	-	60	521.6	104.00307687756167	475.15	56.08500245163586	012345	0.02490910556516268	Heliconiini	0.00397306814647	1	1	1
OG_10323.DioneAgraulisEueidesHeliconius	OG_10323	Nymphalidae	sp|P91664|MAX_DROME	-	-	60	521.6	104.00307687756167	475.15	56.08500245163586	012345	0.02490910556516268	DioneAgraulisEueidesHeliconius	0	1	1	1
OG_10323.Eueides	OG_10323	Nymphalidae	sp|P91664|MAX_DROME	-	-	60	521.6	104.00307687756167	475.15	56.08500245163586	012345	0.02490910556516268	Eueides	0.0272733589514	1	1	1
OG_10326.Heliconius	OG_10326	Nymphalidae	sp|Q8YRI1|YY46_NOSS1	-	-	61	1147.2295081967213	175.82735509981794	1090.5737704918033	145.87772321943137	012345	0.0935764639233185	Heliconius	0.111611259974	1	1	1
OG_10326.Heliconiini	OG_10326	Nymphalidae	sp|Q8YRI1|YY46_NOSS1	-	-	61	1147.2295081967213	175.82735509981794	1090.5737704918033	145.87772321943137	012345	0.0935764639233185	Heliconiini	2.69283941106	0.0350808095171	0.359100625957	1
OG_10326.Eueides	OG_10326	Nymphalidae	sp|Q8YRI1|YY46_NOSS1	-	-	61	1147.2295081967213	175.82735509981794	1090.5737704918033	145.87772321943137	012345	0.0935764639233185	Eueides	0.0963472280184	1	1	1
OG_10327.Heliconius	OG_10327	Nymphalidae	sp|P0A4L2|THIO1_NOSSO	-	-	60	443.3	53.24575100418812	426.5	47.27948815289776	012345	0.07269282471933437	Heliconius	988.718148619	0.00995892651806	0.0453981221889	0.136194366567
OG_10327.Heliconiini	OG_10327	Nymphalidae	sp|P0A4L2|THIO1_NOSSO	-	-	60	443.3	53.24575100418812	426.5	47.27948815289776	012345	0.07269282471933437	Heliconiini	0.0437935595263	1	1	1
OG_10327.Eueides	OG_10327	Nymphalidae	sp|P0A4L2|THIO1_NOSSO	-	-	60	443.3	53.24575100418812	426.5	47.27948815289776	012345	0.07269282471933437	Eueides	0.0926500985082	1	1	1
OG_10328.Heliconius	OG_10328	Nymphalidae	FBgn0038395	41949	CG10407	60	788.4	167.70313056111982	724.75	109.63387934393273	012345	0.06907951239109808	Heliconius	0.156033103233	1	1	1
OG_10328.EueidesHeliconius	OG_10328	Nymphalidae	FBgn0038395	41949	CG10407	60	788.4	167.70313056111982	724.75	109.63387934393273	012345	0.06907951239109808	EueidesHeliconius	0	1	1	1
OG_10328.Heliconiini	OG_10328	Nymphalidae	FBgn0038395	41949	CG10407	60	788.4	167.70313056111982	724.75	109.63387934393273	012345	0.06907951239109808	Heliconiini	0.0149252329142	1	1	1
OG_10328.DioneAgraulisEueidesHeliconius	OG_10328	Nymphalidae	FBgn0038395	41949	CG10407	60	788.4	167.70313056111982	724.75	109.63387934393273	012345	0.06907951239109808	DioneAgraulisEueidesHeliconius	0.511091610172	1	1	1
OG_10328.Eueides	OG_10328	Nymphalidae	FBgn0038395	41949	CG10407	60	788.4	167.70313056111982	724.75	109.63387934393273	012345	0.06907951239109808	Eueides	0.155868105297	1	1	1
OG_10330.Heliconius	OG_10330	Nymphalidae	FBgn0011217	41785	eff	61	444.04918032786884	14.580951226596977	436.0327868852459	19.950732114521553	010020	0.01897791929353747	Heliconius	0	1	1	1
OG_10330.Heliconiini	OG_10330	Nymphalidae	FBgn0011217	41785	eff	61	444.04918032786884	14.580951226596977	436.0327868852459	19.950732114521553	010020	0.01897791929353747	Heliconiini	0	1	1	1
OG_10330.DioneAgraulisEueidesHeliconius	OG_10330	Nymphalidae	FBgn0011217	41785	eff	61	444.04918032786884	14.580951226596977	436.0327868852459	19.950732114521553	010020	0.01897791929353747	DioneAgraulisEueidesHeliconius	0	1	1	1
OG_10330.Eueides	OG_10330	Nymphalidae	FBgn0011217	41785	eff	61	444.04918032786884	14.580951226596977	436.0327868852459	19.950732114521553	010020	0.01897791929353747	Eueides	0	1	1	1
OG_10331.Heliconius	OG_10331	Nymphalidae	sp|P36174|KAE1B_HALMA	-	-	60	583.95	29.121255124049856	574.55	29.992457385149354	010020	0.0743422740385092	Heliconius	0	1	1	1
OG_10331.EueidesHeliconius	OG_10331	Nymphalidae	sp|P36174|KAE1B_HALMA	-	-	60	583.95	29.121255124049856	574.55	29.992457385149354	010020	0.0743422740385092	EueidesHeliconius	0.0261795862979	1	1	1
OG_10331.Heliconiini	OG_10331	Nymphalidae	sp|P36174|KAE1B_HALMA	-	-	60	583.95	29.121255124049856	574.55	29.992457385149354	010020	0.0743422740385092	Heliconiini	0.0111048345539	1	1	1
OG_10331.DioneAgraulisEueidesHeliconius	OG_10331	Nymphalidae	sp|P36174|KAE1B_HALMA	-	-	60	583.95	29.121255124049856	574.55	29.992457385149354	010020	0.0743422740385092	DioneAgraulisEueidesHeliconius	0.0290561674853	1	1	1
OG_10331.Eueides	OG_10331	Nymphalidae	sp|P36174|KAE1B_HALMA	-	-	60	583.95	29.121255124049856	574.55	29.992457385149354	010020	0.0743422740385092	Eueides	0.165677645695	1	1	1
OG_10332.Heliconius	OG_10332	Nymphalidae	sp|Q00558|F8I2_MOUSE	-	-	63	836.9047619047619	134.21088762941943	823.9047619047619	152.50789355430715	010020	0.08501765285916012	Heliconius	2.9574702637	0.0246670802123	0.275617040096	1
OG_10332.EueidesHeliconius	OG_10332	Nymphalidae	sp|Q00558|F8I2_MOUSE	-	-	63	836.9047619047619	134.21088762941943	823.9047619047619	152.50789355430715	010020	0.08501765285916012	EueidesHeliconius	0.0720070561684	1	1	1
OG_10332.Heliconiini	OG_10332	Nymphalidae	sp|Q00558|F8I2_MOUSE	-	-	63	836.9047619047619	134.21088762941943	823.9047619047619	152.50789355430715	010020	0.08501765285916012	Heliconiini	1.4451748458	0.0662386393702	0.422591478669	1
OG_10332.Eueides	OG_10332	Nymphalidae	sp|Q00558|F8I2_MOUSE	-	-	63	836.9047619047619	134.21088762941943	823.9047619047619	152.50789355430715	010020	0.08501765285916012	Eueides	0.0482170440074	1	1	1
OG_10334.Heliconius	OG_10334	Nymphalidae	sp|P50568|RABP2_XENLA	-	-	61	432.04918032786884	100.38963865114998	399.9344262295082	25.79863311441958	012345	0.07796086369794131	Heliconius	0.0559020522543	1	1	1
OG_10334.EueidesHeliconius	OG_10334	Nymphalidae	sp|P50568|RABP2_XENLA	-	-	61	432.04918032786884	100.38963865114998	399.9344262295082	25.79863311441958	012345	0.07796086369794131	EueidesHeliconius	0.122910463675	1	1	1
OG_10334.Heliconiini	OG_10334	Nymphalidae	sp|P50568|RABP2_XENLA	-	-	61	432.04918032786884	100.38963865114998	399.9344262295082	25.79863311441958	012345	0.07796086369794131	Heliconiini	0	1	1	1
OG_10334.Eueides	OG_10334	Nymphalidae	sp|P50568|RABP2_XENLA	-	-	61	432.04918032786884	100.38963865114998	399.9344262295082	25.79863311441958	012345	0.07796086369794131	Eueides	0.039864132746	1	1	1
OG_10335.Heliconius	OG_10335	Nymphalidae	sp|Q4KLT3|TRM44_XENLA	-	-	60	1542.8	209.88415852560192	1425.85	182.111854364289	012345	0.1709241035084673	Heliconius	0.129356493947	1	1	1
OG_10335.EueidesHeliconius	OG_10335	Nymphalidae	sp|Q4KLT3|TRM44_XENLA	-	-	60	1542.8	209.88415852560192	1425.85	182.111854364289	012345	0.1709241035084673	EueidesHeliconius	0.265571375866	1	1	1
OG_10335.Heliconiini	OG_10335	Nymphalidae	sp|Q4KLT3|TRM44_XENLA	-	-	60	1542.8	209.88415852560192	1425.85	182.111854364289	012345	0.1709241035084673	Heliconiini	100000	0.0578527354706	0.0285802702107	0.142901351054
OG_10335.DioneAgraulisEueidesHeliconius	OG_10335	Nymphalidae	sp|Q4KLT3|TRM44_XENLA	-	-	60	1542.8	209.88415852560192	1425.85	182.111854364289	012345	0.1709241035084673	DioneAgraulisEueidesHeliconius	0.229993105045	1	1	1
OG_10335.Eueides	OG_10335	Nymphalidae	sp|Q4KLT3|TRM44_XENLA	-	-	60	1542.8	209.88415852560192	1425.85	182.111854364289	012345	0.1709241035084673	Eueides	0.186095530041	1	1	1
OG_10338.Heliconius	OG_10338	Nymphalidae	FBgn0040066	53428	wds	60	1230.1	292.32428910372806	1047.05	238.12548687614267	012345	0.1836045646379872	Heliconius	1.13848989674	0.187306697372	0.462271359237	1
OG_10338.EueidesHeliconius	OG_10338	Nymphalidae	FBgn0040066	53428	wds	60	1230.1	292.32428910372806	1047.05	238.12548687614267	012345	0.1836045646379872	EueidesHeliconius	1.71225653637	0.0502579441017	0.394665563253	1
OG_10338.Heliconiini	OG_10338	Nymphalidae	FBgn0040066	53428	wds	60	1230.1	292.32428910372806	1047.05	238.12548687614267	012345	0.1836045646379872	Heliconiini	9.57204135103	0.177629247053	5.90765213802e-05	0.000295382606901
OG_10338.DioneAgraulisEueidesHeliconius	OG_10338	Nymphalidae	FBgn0040066	53428	wds	60	1230.1	292.32428910372806	1047.05	238.12548687614267	012345	0.1836045646379872	DioneAgraulisEueidesHeliconius	0.14711488635	1	1	1
OG_10338.Eueides	OG_10338	Nymphalidae	FBgn0040066	53428	wds	60	1230.1	292.32428910372806	1047.05	238.12548687614267	012345	0.1836045646379872	Eueides	0.0670276739855	1	1	1
OG_10339.Heliconius	OG_10339	Nymphalidae	FBgn0260859	39090	Bet3	62	531.7258064516129	134.9319027001588	506.56451612903226	52.55277561428957	010020	0.01781510022184186	Heliconius	0.0355115580371	1	1	1
OG_10339.EueidesHeliconius	OG_10339	Nymphalidae	FBgn0260859	39090	Bet3	62	531.7258064516129	134.9319027001588	506.56451612903226	52.55277561428957	010020	0.01781510022184186	EueidesHeliconius	0	1	1	1
OG_10339.Heliconiini	OG_10339	Nymphalidae	FBgn0260859	39090	Bet3	62	531.7258064516129	134.9319027001588	506.56451612903226	52.55277561428957	010020	0.01781510022184186	Heliconiini	0.0125922463396	1	1	1
OG_10339.DioneAgraulisEueidesHeliconius	OG_10339	Nymphalidae	FBgn0260859	39090	Bet3	62	531.7258064516129	134.9319027001588	506.56451612903226	52.55277561428957	010020	0.01781510022184186	DioneAgraulisEueidesHeliconius	0	1	1	1
OG_10339.Eueides	OG_10339	Nymphalidae	FBgn0260859	39090	Bet3	62	531.7258064516129	134.9319027001588	506.56451612903226	52.55277561428957	010020	0.01781510022184186	Eueides	0.0573732969473	1	1	1
OG_10341.Heliconius	OG_10341	Nymphalidae	sp|P43270|NUC_STAHY	-	-	62	768.9193548387096	115.89125859588637	758.1290322580645	124.9209406592526	012230	0.1204236011566218	Heliconius	8.83134907704	0.0097971483224	0.102259598651	0.511297993256
OG_10341.EueidesHeliconius	OG_10341	Nymphalidae	sp|P43270|NUC_STAHY	-	-	62	768.9193548387096	115.89125859588637	758.1290322580645	124.9209406592526	012230	0.1204236011566218	EueidesHeliconius	0.0526799970362	1	1	1
OG_10341.Heliconiini	OG_10341	Nymphalidae	sp|P43270|NUC_STAHY	-	-	62	768.9193548387096	115.89125859588637	758.1290322580645	124.9209406592526	012230	0.1204236011566218	Heliconiini	0.185383023347	1	1	1
OG_10341.DioneAgraulisEueidesHeliconius	OG_10341	Nymphalidae	sp|P43270|NUC_STAHY	-	-	62	768.9193548387096	115.89125859588637	758.1290322580645	124.9209406592526	012230	0.1204236011566218	DioneAgraulisEueidesHeliconius	0.0490897515193	1	1	1
OG_10341.Eueides	OG_10341	Nymphalidae	sp|P43270|NUC_STAHY	-	-	62	768.9193548387096	115.89125859588637	758.1290322580645	124.9209406592526	012230	0.1204236011566218	Eueides	0.0368034293375	1	1	1
OG_10342.Heliconius	OG_10342	Nymphalidae	sp|P05179|CP2C7_RAT	-	-	61	1420.4754098360656	230.57942741307932	1362.8852459016393	210.5783681354257	012345	0.06933291880999372	Heliconius	0.142891612829	1	1	1
OG_10342.EueidesHeliconius	OG_10342	Nymphalidae	sp|P05179|CP2C7_RAT	-	-	61	1420.4754098360656	230.57942741307932	1362.8852459016393	210.5783681354257	012345	0.06933291880999372	EueidesHeliconius	56.5242543495	0.00750221275332	0.00479617583229	0.0239808791615
OG_10342.Heliconiini	OG_10342	Nymphalidae	sp|P05179|CP2C7_RAT	-	-	61	1420.4754098360656	230.57942741307932	1362.8852459016393	210.5783681354257	012345	0.06933291880999372	Heliconiini	0.0539565178663	1	1	1
OG_10342.DioneAgraulisEueidesHeliconius	OG_10342	Nymphalidae	sp|P05179|CP2C7_RAT	-	-	61	1420.4754098360656	230.57942741307932	1362.8852459016393	210.5783681354257	012345	0.06933291880999372	DioneAgraulisEueidesHeliconius	0.0365553711405	1	1	1
OG_10342.Eueides	OG_10342	Nymphalidae	sp|P05179|CP2C7_RAT	-	-	61	1420.4754098360656	230.57942741307932	1362.8852459016393	210.5783681354257	012345	0.06933291880999372	Eueides	0.155166364233	1	1	1
OG_10347.Heliconius	OG_10347	Nymphalidae	FBgn0032382	34598	Mal-B2	62	1577.9032258064517	452.9451903635418	1379.467741935484	339.2219616740607	012345	0.1899749744405276	Heliconius	0.166480922063	1	1	1
OG_10347.EueidesHeliconius	OG_10347	Nymphalidae	FBgn0032382	34598	Mal-B2	62	1577.9032258064517	452.9451903635418	1379.467741935484	339.2219616740607	012345	0.1899749744405276	EueidesHeliconius	0.24280443701	1	1	1
OG_10347.Heliconiini	OG_10347	Nymphalidae	FBgn0032382	34598	Mal-B2	62	1577.9032258064517	452.9451903635418	1379.467741935484	339.2219616740607	012345	0.1899749744405276	Heliconiini	65.815878031	0.0465867765768	0.013775758314	0.0551030332562
OG_10347.Eueides	OG_10347	Nymphalidae	FBgn0032382	34598	Mal-B2	62	1577.9032258064517	452.9451903635418	1379.467741935484	339.2219616740607	012345	0.1899749744405276	Eueides	1.85858691807	0.0848450112474	0.262897237315	0.788691711945
OG_10349.Heliconius	OG_10349	Nymphalidae	sp|P90789|NDUB7_CAEEL	-	-	57	386.8421052631579	199.3347523396377	346.42105263157896	19.813115776845994	012345	0.08278455268065465	Heliconius	0	1	1	1
OG_10349.Heliconiini	OG_10349	Nymphalidae	sp|P90789|NDUB7_CAEEL	-	-	57	386.8421052631579	199.3347523396377	346.42105263157896	19.813115776845994	012345	0.08278455268065465	Heliconiini	0.00487757980029	1	1	1
OG_10349.Eueides	OG_10349	Nymphalidae	sp|P90789|NDUB7_CAEEL	-	-	57	386.8421052631579	199.3347523396377	346.42105263157896	19.813115776845994	012345	0.08278455268065465	Eueides	0.0396297123177	1	1	1
OG_10358.Heliconius	OG_10358	Nymphalidae	sp|P42574|CASP3_HUMAN	-	-	61	771.688524590164	147.1182797240734	713.360655737705	156.0284791981306	012345	0.1860872437091626	Heliconius	0.231209934242	1	1	1
OG_10358.EueidesHeliconius	OG_10358	Nymphalidae	sp|P42574|CASP3_HUMAN	-	-	61	771.688524590164	147.1182797240734	713.360655737705	156.0284791981306	012345	0.1860872437091626	EueidesHeliconius	0.0392803994112	1	1	1
OG_10358.Heliconiini	OG_10358	Nymphalidae	sp|P42574|CASP3_HUMAN	-	-	61	771.688524590164	147.1182797240734	713.360655737705	156.0284791981306	012345	0.1860872437091626	Heliconiini	221.379338689	0.0197092165313	0.352673522062	1
OG_10358.Eueides	OG_10358	Nymphalidae	sp|P42574|CASP3_HUMAN	-	-	61	771.688524590164	147.1182797240734	713.360655737705	156.0284791981306	012345	0.1860872437091626	Eueides	0.103309248831	1	1	1
OG_10361.Heliconius	OG_10361	Nymphalidae	FBgn0030676	32512	CG12379	60	519.4	14.853955702101715	514.65	15.953918014080429	012345	0.09228330449959411	Heliconius	0.0298264982542	1	1	1
OG_10361.EueidesHeliconius	OG_10361	Nymphalidae	FBgn0030676	32512	CG12379	60	519.4	14.853955702101715	514.65	15.953918014080429	012345	0.09228330449959411	EueidesHeliconius	0.0278538314366	1	1	1
OG_10361.Heliconiini	OG_10361	Nymphalidae	FBgn0030676	32512	CG12379	60	519.4	14.853955702101715	514.65	15.953918014080429	012345	0.09228330449959411	Heliconiini	0.121821187243	1	1	1
OG_10361.DioneAgraulisEueidesHeliconius	OG_10361	Nymphalidae	FBgn0030676	32512	CG12379	60	519.4	14.853955702101715	514.65	15.953918014080429	012345	0.09228330449959411	DioneAgraulisEueidesHeliconius	0	1	1	1
OG_10361.Eueides	OG_10361	Nymphalidae	FBgn0030676	32512	CG12379	60	519.4	14.853955702101715	514.65	15.953918014080429	012345	0.09228330449959411	Eueides	0.0327324372697	1	1	1
OG_10364.Heliconius	OG_10364	Nymphalidae	FBgn0050035	36248	Tret1-1	63	1424.857142857143	274.28839284406405	1379.7619047619048	263.9530811052284	012345	0.04166988538543554	Heliconius	0.00634156375105	1	1	1
OG_10364.EueidesHeliconius	OG_10364	Nymphalidae	FBgn0050035	36248	Tret1-1	63	1424.857142857143	274.28839284406405	1379.7619047619048	263.9530811052284	012345	0.04166988538543554	EueidesHeliconius	0.0263142861746	1	1	1
OG_10364.Heliconiini	OG_10364	Nymphalidae	FBgn0050035	36248	Tret1-1	63	1424.857142857143	274.28839284406405	1379.7619047619048	263.9530811052284	012345	0.04166988538543554	Heliconiini	0.0399905172106	1	1	1
OG_10364.DioneAgraulisEueidesHeliconius	OG_10364	Nymphalidae	FBgn0050035	36248	Tret1-1	63	1424.857142857143	274.28839284406405	1379.7619047619048	263.9530811052284	012345	0.04166988538543554	DioneAgraulisEueidesHeliconius	0.0718635617153	1	1	1
OG_10364.Eueides	OG_10364	Nymphalidae	FBgn0050035	36248	Tret1-1	63	1424.857142857143	274.28839284406405	1379.7619047619048	263.9530811052284	012345	0.04166988538543554	Eueides	2.786982165	0.0238970049179	0.287108124791	1
OG_10365.Heliconius	OG_10365	Nymphalidae	FBgn0015754	36791	Lis-1	61	1210.622950819672	129.61508765830357	1173.688524590164	130.52573905877554	012345	0.02676405667641335	Heliconius	0.0533326378217	1	1	1
OG_10365.EueidesHeliconius	OG_10365	Nymphalidae	FBgn0015754	36791	Lis-1	61	1210.622950819672	129.61508765830357	1173.688524590164	130.52573905877554	012345	0.02676405667641335	EueidesHeliconius	0	1	1	1
OG_10365.Heliconiini	OG_10365	Nymphalidae	FBgn0015754	36791	Lis-1	61	1210.622950819672	129.61508765830357	1173.688524590164	130.52573905877554	012345	0.02676405667641335	Heliconiini	0.00829527162755	1	1	1
OG_10365.DioneAgraulisEueidesHeliconius	OG_10365	Nymphalidae	FBgn0015754	36791	Lis-1	61	1210.622950819672	129.61508765830357	1173.688524590164	130.52573905877554	012345	0.02676405667641335	DioneAgraulisEueidesHeliconius	0	1	1	1
OG_10365.Eueides	OG_10365	Nymphalidae	FBgn0015754	36791	Lis-1	61	1210.622950819672	129.61508765830357	1173.688524590164	130.52573905877554	012345	0.02676405667641335	Eueides	0	1	1	1
OG_10366.Heliconius	OG_10366	Nymphalidae	FBgn0040384	31270	CG32795	63	1155.4285714285713	241.6496029631435	1092.095238095238	184.02326580700782	012345	0.0591780007011346	Heliconius	0.164145746056	1	1	1
OG_10366.EueidesHeliconius	OG_10366	Nymphalidae	FBgn0040384	31270	CG32795	63	1155.4285714285713	241.6496029631435	1092.095238095238	184.02326580700782	012345	0.0591780007011346	EueidesHeliconius	0.0601380624468	1	1	1
OG_10366.Heliconiini	OG_10366	Nymphalidae	FBgn0040384	31270	CG32795	63	1155.4285714285713	241.6496029631435	1092.095238095238	184.02326580700782	012345	0.0591780007011346	Heliconiini	0.133585215362	1	1	1
OG_10366.DioneAgraulisEueidesHeliconius	OG_10366	Nymphalidae	FBgn0040384	31270	CG32795	63	1155.4285714285713	241.6496029631435	1092.095238095238	184.02326580700782	012345	0.0591780007011346	DioneAgraulisEueidesHeliconius	5.76710246209	0.0385197794956	0.163001094042	0.815005470212
OG_10366.Eueides	OG_10366	Nymphalidae	FBgn0040384	31270	CG32795	63	1155.4285714285713	241.6496029631435	1092.095238095238	184.02326580700782	012345	0.0591780007011346	Eueides	0.0181547168104	1	1	1
OG_10376.Heliconius	OG_10376	Nymphalidae	sp|Q6DGM3|RM15_DANRE	-	-	61	865.9180327868852	78.92334838766179	858.1475409836065	82.28296560272648	012345	0.05012422771039463	Heliconius	0.0995001466084	1	1	1
OG_10376.EueidesHeliconius	OG_10376	Nymphalidae	sp|Q6DGM3|RM15_DANRE	-	-	61	865.9180327868852	78.92334838766179	858.1475409836065	82.28296560272648	012345	0.05012422771039463	EueidesHeliconius	0.0348909282507	1	1	1
OG_10376.Heliconiini	OG_10376	Nymphalidae	sp|Q6DGM3|RM15_DANRE	-	-	61	865.9180327868852	78.92334838766179	858.1475409836065	82.28296560272648	012345	0.05012422771039463	Heliconiini	0.0275822902282	1	1	1
OG_10376.Eueides	OG_10376	Nymphalidae	sp|Q6DGM3|RM15_DANRE	-	-	61	865.9180327868852	78.92334838766179	858.1475409836065	82.28296560272648	012345	0.05012422771039463	Eueides	0.0563079729281	1	1	1
OG_10377.Heliconius	OG_10377	Nymphalidae	sp|P41821|MID1_YEAST	-	-	61	965.360655737705	260.72264220229715	712.8688524590164	162.55112440775096	012345	0.1309120468818352	Heliconius	0.150113375952	1	1	1
OG_10377.Heliconiini	OG_10377	Nymphalidae	sp|P41821|MID1_YEAST	-	-	61	965.360655737705	260.72264220229715	712.8688524590164	162.55112440775096	012345	0.1309120468818352	Heliconiini	0.0975624720618	1	1	1
OG_10377.Eueides	OG_10377	Nymphalidae	sp|P41821|MID1_YEAST	-	-	61	965.360655737705	260.72264220229715	712.8688524590164	162.55112440775096	012345	0.1309120468818352	Eueides	0.0387237320788	1	1	1
OG_10380.Heliconius	OG_10380	Nymphalidae	sp|P16912|KDC2_DROME	-	-	56	1039.0714285714287	111.42692306473096	1019.3571428571429	143.02652458440664	012345	0.01483366352719709	Heliconius	0.0374501875696	1	1	1
OG_10380.EueidesHeliconius	OG_10380	Nymphalidae	sp|P16912|KDC2_DROME	-	-	56	1039.0714285714287	111.42692306473096	1019.3571428571429	143.02652458440664	012345	0.01483366352719709	EueidesHeliconius	0	1	1	1
OG_10380.Heliconiini	OG_10380	Nymphalidae	sp|P16912|KDC2_DROME	-	-	56	1039.0714285714287	111.42692306473096	1019.3571428571429	143.02652458440664	012345	0.01483366352719709	Heliconiini	0.0200954467085	1	1	1
OG_10380.Eueides	OG_10380	Nymphalidae	sp|P16912|KDC2_DROME	-	-	56	1039.0714285714287	111.42692306473096	1019.3571428571429	143.02652458440664	012345	0.01483366352719709	Eueides	0.0170157994585	1	1	1
OG_10385.Heliconius	OG_10385	Nymphalidae	sp|F1MLX5|LGR4_BOVIN	-	-	61	1027.9180327868853	150.373338136651	1012.2295081967213	155.48405573653758	012345	0.09212839218166285	Heliconius	0.0949731650393	1	1	1
OG_10385.EueidesHeliconius	OG_10385	Nymphalidae	sp|F1MLX5|LGR4_BOVIN	-	-	61	1027.9180327868853	150.373338136651	1012.2295081967213	155.48405573653758	012345	0.09212839218166285	EueidesHeliconius	0.0471528222021	1	1	1
OG_10385.Heliconiini	OG_10385	Nymphalidae	sp|F1MLX5|LGR4_BOVIN	-	-	61	1027.9180327868853	150.373338136651	1012.2295081967213	155.48405573653758	012345	0.09212839218166285	Heliconiini	0.375905842541	0.225195443952	1	1
OG_10385.DioneAgraulisEueidesHeliconius	OG_10385	Nymphalidae	sp|F1MLX5|LGR4_BOVIN	-	-	61	1027.9180327868853	150.373338136651	1012.2295081967213	155.48405573653758	012345	0.09212839218166285	DioneAgraulisEueidesHeliconius	32.637174247	0.0234942054516	0.0391376135133	0.195688067566
OG_10385.Eueides	OG_10385	Nymphalidae	sp|F1MLX5|LGR4_BOVIN	-	-	61	1027.9180327868853	150.373338136651	1012.2295081967213	155.48405573653758	012345	0.09212839218166285	Eueides	0.0632499307844	1	1	1
OG_10389.Heliconius	OG_10389	Nymphalidae	FBgn0036893	40139	PIG-F	57	689.0526315789474	92.08147061117614	679.1052631578947	89.71117089206608	012230	0.05714425700189629	Heliconius	0.0280917706778	1	1	1
OG_10389.EueidesHeliconius	OG_10389	Nymphalidae	FBgn0036893	40139	PIG-F	57	689.0526315789474	92.08147061117614	679.1052631578947	89.71117089206608	012230	0.05714425700189629	EueidesHeliconius	0.0213006707576	1	1	1
OG_10389.Heliconiini	OG_10389	Nymphalidae	FBgn0036893	40139	PIG-F	57	689.0526315789474	92.08147061117614	679.1052631578947	89.71117089206608	012230	0.05714425700189629	Heliconiini	0.0270368167301	1	1	1
OG_10389.Eueides	OG_10389	Nymphalidae	FBgn0036893	40139	PIG-F	57	689.0526315789474	92.08147061117614	679.1052631578947	89.71117089206608	012230	0.05714425700189629	Eueides	0.0790031221853	1	1	1
OG_10392.Heliconius	OG_10392	Nymphalidae	sp|P07686|HEXB_HUMAN	-	-	59	2420.593220338983	324.0656513651426	2348.898305084746	373.1476144912588	012345	0.1972376596406137	Heliconius	0.132929293048	1	1	1
OG_10392.EueidesHeliconius	OG_10392	Nymphalidae	sp|P07686|HEXB_HUMAN	-	-	59	2420.593220338983	324.0656513651426	2348.898305084746	373.1476144912588	012345	0.1972376596406137	EueidesHeliconius	0.127834579994	1	1	1
OG_10392.Heliconiini	OG_10392	Nymphalidae	sp|P07686|HEXB_HUMAN	-	-	59	2420.593220338983	324.0656513651426	2348.898305084746	373.1476144912588	012345	0.1972376596406137	Heliconiini	1.345765643	0.308284990426	0.360662506545	1
OG_10392.DioneAgraulisEueidesHeliconius	OG_10392	Nymphalidae	sp|P07686|HEXB_HUMAN	-	-	59	2420.593220338983	324.0656513651426	2348.898305084746	373.1476144912588	012345	0.1972376596406137	DioneAgraulisEueidesHeliconius	0.573061263788	1	1	1
OG_10392.Eueides	OG_10392	Nymphalidae	sp|P07686|HEXB_HUMAN	-	-	59	2420.593220338983	324.0656513651426	2348.898305084746	373.1476144912588	012345	0.1972376596406137	Eueides	0.287727715395	1	1	1
OG_10396.Heliconius	OG_10396	Nymphalidae	sp|O60494|CUBN_HUMAN	-	-	62	1169.516129032258	315.2055520805986	1068.241935483871	299.70968132532	012210	0.2068839986712093	Heliconius	330.508081659	0.0108378277872	0.083797984359	0.418989921795
OG_10396.EueidesHeliconius	OG_10396	Nymphalidae	sp|O60494|CUBN_HUMAN	-	-	62	1169.516129032258	315.2055520805986	1068.241935483871	299.70968132532	012210	0.2068839986712093	EueidesHeliconius	0.0831190728867	1	1	1
OG_10396.Heliconiini	OG_10396	Nymphalidae	sp|O60494|CUBN_HUMAN	-	-	62	1169.516129032258	315.2055520805986	1068.241935483871	299.70968132532	012210	0.2068839986712093	Heliconiini	0.482606419528	1	1	1
OG_10396.DioneAgraulisEueidesHeliconius	OG_10396	Nymphalidae	sp|O60494|CUBN_HUMAN	-	-	62	1169.516129032258	315.2055520805986	1068.241935483871	299.70968132532	012210	0.2068839986712093	DioneAgraulisEueidesHeliconius	0.181516742124	1	1	1
OG_10396.Eueides	OG_10396	Nymphalidae	sp|O60494|CUBN_HUMAN	-	-	62	1169.516129032258	315.2055520805986	1068.241935483871	299.70968132532	012210	0.2068839986712093	Eueides	0.242200716255	1	1	1
OG_10398.Heliconius	OG_10398	Heliconiini	sp|Q5PQK8|TBRG1_RAT	-	-	52	303.75	19.56534907982438	294.86538461538464	5.106665501516494	012310	0.08216661860206959	Heliconius	0.0452900350801	1	1	1
OG_10398.EueidesHeliconius	OG_10398	Heliconiini	sp|Q5PQK8|TBRG1_RAT	-	-	52	303.75	19.56534907982438	294.86538461538464	5.106665501516494	012310	0.08216661860206959	EueidesHeliconius	0.0294040349556	1	1	1
OG_10398.DioneAgraulisEueidesHeliconius	OG_10398	Heliconiini	sp|Q5PQK8|TBRG1_RAT	-	-	52	303.75	19.56534907982438	294.86538461538464	5.106665501516494	012310	0.08216661860206959	DioneAgraulisEueidesHeliconius	10000000000	1	0.406533417067	1
OG_10398.Eueides	OG_10398	Heliconiini	sp|Q5PQK8|TBRG1_RAT	-	-	52	303.75	19.56534907982438	294.86538461538464	5.106665501516494	012310	0.08216661860206959	Eueides	0.0536475272195	1	1	1
OG_10399.Heliconius	OG_10399	Nymphalidae	FBgn0020497	34167	emb	62	3059.7580645161293	419.0291654136042	3036.8225806451615	433.29314833417374	012345	0.009600114653640263	Heliconius	0.0222879635623	1	1	1
OG_10399.EueidesHeliconius	OG_10399	Nymphalidae	FBgn0020497	34167	emb	62	3059.7580645161293	419.0291654136042	3036.8225806451615	433.29314833417374	012345	0.009600114653640263	EueidesHeliconius	0	1	1	1
OG_10399.Heliconiini	OG_10399	Nymphalidae	FBgn0020497	34167	emb	62	3059.7580645161293	419.0291654136042	3036.8225806451615	433.29314833417374	012345	0.009600114653640263	Heliconiini	0.0114485017018	1	1	1
OG_10399.DioneAgraulisEueidesHeliconius	OG_10399	Nymphalidae	FBgn0020497	34167	emb	62	3059.7580645161293	419.0291654136042	3036.8225806451615	433.29314833417374	012345	0.009600114653640263	DioneAgraulisEueidesHeliconius	0.0816946859866	1	1	1
OG_10399.Eueides	OG_10399	Nymphalidae	FBgn0020497	34167	emb	62	3059.7580645161293	419.0291654136042	3036.8225806451615	433.29314833417374	012345	0.009600114653640263	Eueides	0.00355169063238	1	1	1
OG_1040.Heliconius	OG_1040	Nymphalidae	FBgn0025630	31175	Rtca	61	1039.4262295081967	275.75484830043007	966.7377049180328	225.9267182538668	012345	0.1036616606103715	Heliconius	0.0556644869068	1	1	1
OG_1040.EueidesHeliconius	OG_1040	Nymphalidae	FBgn0025630	31175	Rtca	61	1039.4262295081967	275.75484830043007	966.7377049180328	225.9267182538668	012345	0.1036616606103715	EueidesHeliconius	21.3739318102	0.00853866531145	0.169766773982	0.848833869908
OG_1040.Heliconiini	OG_1040	Nymphalidae	FBgn0025630	31175	Rtca	61	1039.4262295081967	275.75484830043007	966.7377049180328	225.9267182538668	012345	0.1036616606103715	Heliconiini	1.17455455862	0.243843773011	0.5	1
OG_1040.DioneAgraulisEueidesHeliconius	OG_1040	Nymphalidae	FBgn0025630	31175	Rtca	61	1039.4262295081967	275.75484830043007	966.7377049180328	225.9267182538668	012345	0.1036616606103715	DioneAgraulisEueidesHeliconius	10000000000	1	0.336998517572	1
OG_1040.Eueides	OG_1040	Nymphalidae	FBgn0025630	31175	Rtca	61	1039.4262295081967	275.75484830043007	966.7377049180328	225.9267182538668	012345	0.1036616606103715	Eueides	0.10281428566	1	1	1
OG_10413.Heliconius	OG_10413	Nymphalidae	sp|O67611|ACP_AQUAE	-	-	59	531.9661016949152	46.065158752629	504.5593220338983	43.25418415596333	012345	0.1568247670110322	Heliconius	0.168060356419	1	1	1
OG_10413.EueidesHeliconius	OG_10413	Nymphalidae	sp|O67611|ACP_AQUAE	-	-	59	531.9661016949152	46.065158752629	504.5593220338983	43.25418415596333	012345	0.1568247670110322	EueidesHeliconius	0	1	1	1
OG_10413.Heliconiini	OG_10413	Nymphalidae	sp|O67611|ACP_AQUAE	-	-	59	531.9661016949152	46.065158752629	504.5593220338983	43.25418415596333	012345	0.1568247670110322	Heliconiini	0.151475654185	1	1	1
OG_10413.DioneAgraulisEueidesHeliconius	OG_10413	Nymphalidae	sp|O67611|ACP_AQUAE	-	-	59	531.9661016949152	46.065158752629	504.5593220338983	43.25418415596333	012345	0.1568247670110322	DioneAgraulisEueidesHeliconius	0	1	1	1
OG_10413.Eueides	OG_10413	Nymphalidae	sp|O67611|ACP_AQUAE	-	-	59	531.9661016949152	46.065158752629	504.5593220338983	43.25418415596333	012345	0.1568247670110322	Eueides	0.232487048877	1	1	1
OG_10414.Heliconius	OG_10414	Nymphalidae	-	47757	-	57	345.42105263157896	14.637068262224489	335.10526315789474	14.792938346750047	010020	0.06718780638525879	Heliconius	0.0537575953507	1	1	1
OG_10414.EueidesHeliconius	OG_10414	Nymphalidae	-	47757	-	57	345.42105263157896	14.637068262224489	335.10526315789474	14.792938346750047	010020	0.06718780638525879	EueidesHeliconius	0.0556706524062	1	1	1
OG_10414.Heliconiini	OG_10414	Nymphalidae	-	47757	-	57	345.42105263157896	14.637068262224489	335.10526315789474	14.792938346750047	010020	0.06718780638525879	Heliconiini	0.232019807268	1	1	1
OG_10414.DioneAgraulisEueidesHeliconius	OG_10414	Nymphalidae	-	47757	-	57	345.42105263157896	14.637068262224489	335.10526315789474	14.792938346750047	010020	0.06718780638525879	DioneAgraulisEueidesHeliconius	0.335316233206	1	1	1
OG_10414.Eueides	OG_10414	Nymphalidae	-	47757	-	57	345.42105263157896	14.637068262224489	335.10526315789474	14.792938346750047	010020	0.06718780638525879	Eueides	0.0893641247792	1	1	1
OG_10416.Heliconius	OG_10416	Nymphalidae	sp|Q5PSV9|MDC1_MOUSE	-	-	63	3372.6190476190477	523.1421982952514	3143.6666666666665	537.5553422967221	012345	0.2372062781938493	Heliconius	0.127557806626	1	1	1
OG_10416.EueidesHeliconius	OG_10416	Nymphalidae	sp|Q5PSV9|MDC1_MOUSE	-	-	63	3372.6190476190477	523.1421982952514	3143.6666666666665	537.5553422967221	012345	0.2372062781938493	EueidesHeliconius	0.155016609318	1	1	1
OG_10416.Heliconiini	OG_10416	Nymphalidae	sp|Q5PSV9|MDC1_MOUSE	-	-	63	3372.6190476190477	523.1421982952514	3143.6666666666665	537.5553422967221	012345	0.2372062781938493	Heliconiini	7.35707580924	0.0454075493401	0.0976498150829	0.390599260332
OG_10416.DioneAgraulisEueidesHeliconius	OG_10416	Nymphalidae	sp|Q5PSV9|MDC1_MOUSE	-	-	63	3372.6190476190477	523.1421982952514	3143.6666666666665	537.5553422967221	012345	0.2372062781938493	DioneAgraulisEueidesHeliconius	7.43135092541	0.0427033410556	0.0955738070441	0.477869035221
OG_10416.Eueides	OG_10416	Nymphalidae	sp|Q5PSV9|MDC1_MOUSE	-	-	63	3372.6190476190477	523.1421982952514	3143.6666666666665	537.5553422967221	012345	0.2372062781938493	Eueides	3.74513361621	0.0207215824745	0.356345849022	1
OG_10418.EueidesHeliconius	OG_10418	Heliconiini	-	47757	-	49	477.85714285714283	97.46019595670003	374.6326530612245	30.071135986056102	010020	1.019695183210913	EueidesHeliconius	1.73097708909	1	0.386161495226	0.386161495226
OG_10418.Eueides	OG_10418	Heliconiini	-	47757	-	49	477.85714285714283	97.46019595670003	374.6326530612245	30.071135986056102	010020	1.019695183210913	Eueides	10000000000	1	0.0787529022804	0.157505804561
OG_1042.Heliconius	OG_1042	Nymphalidae	sp|P05853|CITB_ECOLX	-	-	61	630.9344262295082	127.89043323562314	545.7540983606557	44.52800030399178	012345	0.1287534501755469	Heliconius	0	1	1	1
OG_1042.EueidesHeliconius	OG_1042	Nymphalidae	sp|P05853|CITB_ECOLX	-	-	61	630.9344262295082	127.89043323562314	545.7540983606557	44.52800030399178	012345	0.1287534501755469	EueidesHeliconius	0.165955777033	1	1	1
OG_1042.Eueides	OG_1042	Nymphalidae	sp|P05853|CITB_ECOLX	-	-	61	630.9344262295082	127.89043323562314	545.7540983606557	44.52800030399178	012345	0.1287534501755469	Eueides	0	1	1	1
OG_10422.Heliconius	OG_10422	Nymphalidae	-	47757	-	59	565.0677966101695	91.30204378999312	507.40677966101697	81.36819822786882	012345	0.318962113941636	Heliconius	0.315117929466	1	1	1
OG_10422.EueidesHeliconius	OG_10422	Nymphalidae	-	47757	-	59	565.0677966101695	91.30204378999312	507.40677966101697	81.36819822786882	012345	0.318962113941636	EueidesHeliconius	0.13428554245	1	1	1
OG_10422.Heliconiini	OG_10422	Nymphalidae	-	47757	-	59	565.0677966101695	91.30204378999312	507.40677966101697	81.36819822786882	012345	0.318962113941636	Heliconiini	181.684729163	0.0243841783249	0.0394734433722	0.197367216861
OG_10422.DioneAgraulisEueidesHeliconius	OG_10422	Nymphalidae	-	47757	-	59	565.0677966101695	91.30204378999312	507.40677966101697	81.36819822786882	012345	0.318962113941636	DioneAgraulisEueidesHeliconius	10000000000	1	0.358743592665	1
OG_10422.Eueides	OG_10422	Nymphalidae	-	47757	-	59	565.0677966101695	91.30204378999312	507.40677966101697	81.36819822786882	012345	0.318962113941636	Eueides	0.200916772	1	1	1
OG_10431.Heliconius	OG_10431	Nymphalidae	sp|Q02SH2|IOJAP_PSEAB	-	-	60	697.5	58.617830051956034	677.35	59.43506961382312	012345	0.1119688484512958	Heliconius	0.0434508190665	1	1	1
OG_10431.EueidesHeliconius	OG_10431	Nymphalidae	sp|Q02SH2|IOJAP_PSEAB	-	-	60	697.5	58.617830051956034	677.35	59.43506961382312	012345	0.1119688484512958	EueidesHeliconius	0.372615815442	1	1	1
OG_10431.Heliconiini	OG_10431	Nymphalidae	sp|Q02SH2|IOJAP_PSEAB	-	-	60	697.5	58.617830051956034	677.35	59.43506961382312	012345	0.1119688484512958	Heliconiini	0.0646621454901	1	1	1
OG_10431.Eueides	OG_10431	Nymphalidae	sp|Q02SH2|IOJAP_PSEAB	-	-	60	697.5	58.617830051956034	677.35	59.43506961382312	012345	0.1119688484512958	Eueides	0.374287211928	1	1	1
OG_10432.Heliconius	OG_10432	Nymphalidae	sp|P00762|TRY1_RAT	-	-	60	899.55	235.55879839224858	808.45	192.50830501565378	012345	0.1055137520121233	Heliconius	0.161350404631	1	1	1
OG_10432.EueidesHeliconius	OG_10432	Nymphalidae	sp|P00762|TRY1_RAT	-	-	60	899.55	235.55879839224858	808.45	192.50830501565378	012345	0.1055137520121233	EueidesHeliconius	6.05977753993	0.0198214811414	0.143025738487	0.572102953948
OG_10432.Heliconiini	OG_10432	Nymphalidae	sp|P00762|TRY1_RAT	-	-	60	899.55	235.55879839224858	808.45	192.50830501565378	012345	0.1055137520121233	Heliconiini	0.211759826715	1	1	1
OG_10432.Eueides	OG_10432	Nymphalidae	sp|P00762|TRY1_RAT	-	-	60	899.55	235.55879839224858	808.45	192.50830501565378	012345	0.1055137520121233	Eueides	0.0586754478231	1	1	1
OG_10435.Heliconius	OG_10435	Nymphalidae	sp|B9WZ56|NEUPP_BOMMO	-	-	60	1000.55	159.5363516569186	974.95	158.25437592686023	012345	0.05311255295228508	Heliconius	0.0266318984026	1	1	1
OG_10435.Heliconiini	OG_10435	Nymphalidae	sp|B9WZ56|NEUPP_BOMMO	-	-	60	1000.55	159.5363516569186	974.95	158.25437592686023	012345	0.05311255295228508	Heliconiini	0.0436897256557	1	1	1
OG_10435.Eueides	OG_10435	Nymphalidae	sp|B9WZ56|NEUPP_BOMMO	-	-	60	1000.55	159.5363516569186	974.95	158.25437592686023	012345	0.05311255295228508	Eueides	0	1	1	1
OG_10439.Heliconius	OG_10439	Nymphalidae	sp|A4IGL7|PXDN_XENTR	-	-	57	997.9473684210526	546.4981796747467	809.2105263157895	169.0106128549853	012230	0.2765775413826472	Heliconius	0.247373185834	1	1	1
OG_10439.EueidesHeliconius	OG_10439	Nymphalidae	sp|A4IGL7|PXDN_XENTR	-	-	57	997.9473684210526	546.4981796747467	809.2105263157895	169.0106128549853	012230	0.2765775413826472	EueidesHeliconius	100000	0.0107707786076	0.00557831993677	0.0278915996838
OG_10439.Heliconiini	OG_10439	Nymphalidae	sp|A4IGL7|PXDN_XENTR	-	-	57	997.9473684210526	546.4981796747467	809.2105263157895	169.0106128549853	012230	0.2765775413826472	Heliconiini	4.68562528801	0.0646162438608	0.315636677419	1
OG_10439.DioneAgraulisEueidesHeliconius	OG_10439	Nymphalidae	sp|A4IGL7|PXDN_XENTR	-	-	57	997.9473684210526	546.4981796747467	809.2105263157895	169.0106128549853	012230	0.2765775413826472	DioneAgraulisEueidesHeliconius	0.543094247116	1	1	1
OG_10439.Eueides	OG_10439	Nymphalidae	sp|A4IGL7|PXDN_XENTR	-	-	57	997.9473684210526	546.4981796747467	809.2105263157895	169.0106128549853	012230	0.2765775413826472	Eueides	0.273335745169	1	1	1
OG_10443.Eueides	OG_10443	Nymphalidae	-	47757	-	54	345.55555555555554	60.3243291828266	317.72222222222223	31.844772038324276	012310	0.09311788317200657	Eueides	23.4141324771	0.0497212848914	0.0172508120632	0.0172508120632
OG_10444.Heliconius	OG_10444	Nymphalidae	FBgn0267975	42306	vib	62	900.1935483870968	612.9430284189625	808.741935483871	145.33309188293595	012345	0.06289037362157039	Heliconius	0	1	1	1
OG_10444.EueidesHeliconius	OG_10444	Nymphalidae	FBgn0267975	42306	vib	62	900.1935483870968	612.9430284189625	808.741935483871	145.33309188293595	012345	0.06289037362157039	EueidesHeliconius	0.141687656032	1	1	1
OG_10444.Heliconiini	OG_10444	Nymphalidae	FBgn0267975	42306	vib	62	900.1935483870968	612.9430284189625	808.741935483871	145.33309188293595	012345	0.06289037362157039	Heliconiini	0.0622024907845	1	1	1
OG_10444.Eueides	OG_10444	Nymphalidae	FBgn0267975	42306	vib	62	900.1935483870968	612.9430284189625	808.741935483871	145.33309188293595	012345	0.06289037362157039	Eueides	0.0771638619668	1	1	1
OG_10449.Heliconius	OG_10449	Nymphalidae	FBgn0002906	41366	Blm	62	1859.8548387096773	244.82197921927877	1824.6290322580646	240.91768329632828	012345	0.09546747085442849	Heliconius	0.105515831987	1	1	1
OG_10449.EueidesHeliconius	OG_10449	Nymphalidae	FBgn0002906	41366	Blm	62	1859.8548387096773	244.82197921927877	1824.6290322580646	240.91768329632828	012345	0.09546747085442849	EueidesHeliconius	3.74039768985	0.035270109865	0.1659516352	0.663806540801
OG_10449.Heliconiini	OG_10449	Nymphalidae	FBgn0002906	41366	Blm	62	1859.8548387096773	244.82197921927877	1824.6290322580646	240.91768329632828	012345	0.09546747085442849	Heliconiini	1.52758550685	0.186784274931	0.345945031531	1
OG_10449.DioneAgraulisEueidesHeliconius	OG_10449	Nymphalidae	FBgn0002906	41366	Blm	62	1859.8548387096773	244.82197921927877	1824.6290322580646	240.91768329632828	012345	0.09546747085442849	DioneAgraulisEueidesHeliconius	603.525770061	0.00568288263636	0.0409124585407	0.204562292704
OG_10449.Eueides	OG_10449	Nymphalidae	FBgn0002906	41366	Blm	62	1859.8548387096773	244.82197921927877	1824.6290322580646	240.91768329632828	012345	0.09546747085442849	Eueides	0.122115032013	1	1	1
OG_1045.Heliconius	OG_1045	Nymphalidae	FBgn0030304	32093	Cyp4g15	63	1620.904761904762	273.0351285199318	1572.142857142857	252.20310894845312	012345	0.0533147223050967	Heliconius	3.98894429684	0.0245381239109	0.210597730804	0.631793192412
OG_1045.EueidesHeliconius	OG_1045	Nymphalidae	FBgn0030304	32093	Cyp4g15	63	1620.904761904762	273.0351285199318	1572.142857142857	252.20310894845312	012345	0.0533147223050967	EueidesHeliconius	0.0430387084233	1	1	1
OG_1045.Heliconiini	OG_1045	Nymphalidae	FBgn0030304	32093	Cyp4g15	63	1620.904761904762	273.0351285199318	1572.142857142857	252.20310894845312	012345	0.0533147223050967	Heliconiini	0.0435216068215	1	1	1
OG_1045.DioneAgraulisEueidesHeliconius	OG_1045	Nymphalidae	FBgn0030304	32093	Cyp4g15	63	1620.904761904762	273.0351285199318	1572.142857142857	252.20310894845312	012345	0.0533147223050967	DioneAgraulisEueidesHeliconius	14.8105895388	0.00651526804064	0.083339576312	0.333358305248
OG_1045.Eueides	OG_1045	Nymphalidae	FBgn0030304	32093	Cyp4g15	63	1620.904761904762	273.0351285199318	1572.142857142857	252.20310894845312	012345	0.0533147223050967	Eueides	1557.69953594	0.00443966913715	0.0246017735309	0.123008867655
OG_10451.Eueides_Evib	OG_10451	Heliconiinae	sp|D3ZFW5|TM107_RAT	-	-	38	487.8157894736842	337.40790987383417	398.2105263157895	31.55209384555614	012345	0.2693550001133662	Eueides	0.0756278369161	1	1	1
OG_10451.EueidesHeliconius	OG_10451	Heliconiinae	sp|D3ZFW5|TM107_RAT	-	-	38	487.8157894736842	337.40790987383417	398.2105263157895	31.55209384555614	012345	0.2693550001133662	EueidesHeliconius	0.356570481327	1	1	1
OG_10451.DioneAgraulisEueidesHeliconius	OG_10451	Heliconiinae	sp|D3ZFW5|TM107_RAT	-	-	38	487.8157894736842	337.40790987383417	398.2105263157895	31.55209384555614	012345	0.2693550001133662	DioneAgraulisEueidesHeliconius	0.0840952702858	1	1	1
OG_10451.Heliconius	OG_10451	Heliconiinae	sp|D3ZFW5|TM107_RAT	-	-	38	487.8157894736842	337.40790987383417	398.2105263157895	31.55209384555614	012345	0.2693550001133662	Heliconius	0.304747148278	1	1	1
OG_1046.Heliconius	OG_1046	Nymphalidae	FBgn0004170	30982	sc	59	721.4237288135594	158.89909423532853	608.9491525423729	53.88544777890096	010020	0.1016980364252512	Heliconius	0.0188899975833	1	1	1
OG_1046.Heliconiini	OG_1046	Nymphalidae	FBgn0004170	30982	sc	59	721.4237288135594	158.89909423532853	608.9491525423729	53.88544777890096	010020	0.1016980364252512	Heliconiini	0.0340686025723	1	1	1
OG_1046.Eueides	OG_1046	Nymphalidae	FBgn0004170	30982	sc	59	721.4237288135594	158.89909423532853	608.9491525423729	53.88544777890096	010020	0.1016980364252512	Eueides	0.109795991996	1	1	1
OG_10462.Heliconius	OG_10462	Nymphalidae	sp|P50995|ANX11_HUMAN	-	-	63	1355.4761904761904	209.16742417945602	1242.5238095238096	204.89407694328284	012345	0.09344999298216669	Heliconius	0.0233063731909	1	1	1
OG_10462.EueidesHeliconius	OG_10462	Nymphalidae	sp|P50995|ANX11_HUMAN	-	-	63	1355.4761904761904	209.16742417945602	1242.5238095238096	204.89407694328284	012345	0.09344999298216669	EueidesHeliconius	0.0808280976135	1	1	1
OG_10462.Heliconiini	OG_10462	Nymphalidae	sp|P50995|ANX11_HUMAN	-	-	63	1355.4761904761904	209.16742417945602	1242.5238095238096	204.89407694328284	012345	0.09344999298216669	Heliconiini	23.7678393324	0.0393295314651	6.10897121952e-05	0.000305448560976
OG_10462.DioneAgraulisEueidesHeliconius	OG_10462	Nymphalidae	sp|P50995|ANX11_HUMAN	-	-	63	1355.4761904761904	209.16742417945602	1242.5238095238096	204.89407694328284	012345	0.09344999298216669	DioneAgraulisEueidesHeliconius	0	1	1	1
OG_10462.Eueides	OG_10462	Nymphalidae	sp|P50995|ANX11_HUMAN	-	-	63	1355.4761904761904	209.16742417945602	1242.5238095238096	204.89407694328284	012345	0.09344999298216669	Eueides	0.0469759826157	1	1	1
OG_10463.Heliconius	OG_10463	Heliconiini	-	47757	-	43	261.2093023255814	38.865036681539834	251.7906976744186	1.3564340996667612	012310	0.1042806572489326	Heliconius	0.108890356404	1	1	1
OG_10463.EueidesHeliconius	OG_10463	Heliconiini	-	47757	-	43	261.2093023255814	38.865036681539834	251.7906976744186	1.3564340996667612	012310	0.1042806572489326	EueidesHeliconius	0	1	1	1
OG_10463.DioneAgraulisEueidesHeliconius	OG_10463	Heliconiini	-	47757	-	43	261.2093023255814	38.865036681539834	251.7906976744186	1.3564340996667612	012310	0.1042806572489326	DioneAgraulisEueidesHeliconius	0.0203122552698	1	1	1
OG_10463.Eueides	OG_10463	Heliconiini	-	47757	-	43	261.2093023255814	38.865036681539834	251.7906976744186	1.3564340996667612	012310	0.1042806572489326	Eueides	0	1	1	1
OG_10464.Heliconius	OG_10464	Heliconiini	-	47757	-	42	452.64285714285717	111.62795805893863	376.35714285714283	20.7970023350109	010020	0.7104080100143898	Heliconius	100000	0.0103644280333	0.00178845341075	0.007153813643
OG_10464.EueidesHeliconius	OG_10464	Heliconiini	-	47757	-	42	452.64285714285717	111.62795805893863	376.35714285714283	20.7970023350109	010020	0.7104080100143898	EueidesHeliconius	10000000000	1	0.245990544163	0.737971632489
OG_10464.DioneAgraulisEueidesHeliconius	OG_10464	Heliconiini	-	47757	-	42	452.64285714285717	111.62795805893863	376.35714285714283	20.7970023350109	010020	0.7104080100143898	DioneAgraulisEueidesHeliconius	10000000000	1	0.307312314637	0.614624629273
OG_10464.Eueides	OG_10464	Heliconiini	-	47757	-	42	452.64285714285717	111.62795805893863	376.35714285714283	20.7970023350109	010020	0.7104080100143898	Eueides	0	1	1	1
OG_10465.Heliconius	OG_10465	Heliconiinae	sp|O16000|STX1A_CAEEL	-	-	53	663.9622641509434	547.7093624777807	430.47169811320754	32.245873671130774	012345	0.1409719730175438	Heliconius	0.290506784284	1	1	1
OG_10465.EueidesHeliconius	OG_10465	Heliconiinae	sp|O16000|STX1A_CAEEL	-	-	53	663.9622641509434	547.7093624777807	430.47169811320754	32.245873671130774	012345	0.1409719730175438	EueidesHeliconius	0.209715773645	1	1	1
OG_10465.DioneAgraulisEueidesHeliconius	OG_10465	Heliconiinae	sp|O16000|STX1A_CAEEL	-	-	53	663.9622641509434	547.7093624777807	430.47169811320754	32.245873671130774	012345	0.1409719730175438	DioneAgraulisEueidesHeliconius	0.199985724623	1	1	1
OG_10465.Eueides	OG_10465	Heliconiinae	sp|O16000|STX1A_CAEEL	-	-	53	663.9622641509434	547.7093624777807	430.47169811320754	32.245873671130774	012345	0.1409719730175438	Eueides	7.26640899015	0.0812446747763	0.0830407018295	0.332162807318
OG_10468.Heliconius	OG_10468	Nymphalidae	-	47757	-	58	594.1551724137931	73.72591406202177	544.0344827586207	56.012918927702984	012345	0.1656925170191952	Heliconius	0.0663136409404	1	1	1
OG_10468.EueidesHeliconius	OG_10468	Nymphalidae	-	47757	-	58	594.1551724137931	73.72591406202177	544.0344827586207	56.012918927702984	012345	0.1656925170191952	EueidesHeliconius	0.0961037550979	1	1	1
OG_10468.Heliconiini	OG_10468	Nymphalidae	-	47757	-	58	594.1551724137931	73.72591406202177	544.0344827586207	56.012918927702984	012345	0.1656925170191952	Heliconiini	0.126691891852	1	1	1
OG_10468.DioneAgraulisEueidesHeliconius	OG_10468	Nymphalidae	-	47757	-	58	594.1551724137931	73.72591406202177	544.0344827586207	56.012918927702984	012345	0.1656925170191952	DioneAgraulisEueidesHeliconius	0.154875108472	1	1	1
OG_10468.Eueides	OG_10468	Nymphalidae	-	47757	-	58	594.1551724137931	73.72591406202177	544.0344827586207	56.012918927702984	012345	0.1656925170191952	Eueides	0.0481006886536	1	1	1
OG_1047.Heliconius	OG_1047	Nymphalidae	FBgn0026721	36919	fat-spondin	59	2462.4406779661017	409.57788403558345	2351.593220338983	407.7480993167339	012345	0.09288552993516709	Heliconius	0.12557958004	1	1	1
OG_1047.EueidesHeliconius	OG_1047	Nymphalidae	FBgn0026721	36919	fat-spondin	59	2462.4406779661017	409.57788403558345	2351.593220338983	407.7480993167339	012345	0.09288552993516709	EueidesHeliconius	0.0984505084112	1	1	1
OG_1047.Heliconiini	OG_1047	Nymphalidae	FBgn0026721	36919	fat-spondin	59	2462.4406779661017	409.57788403558345	2351.593220338983	407.7480993167339	012345	0.09288552993516709	Heliconiini	0.502203309696	0.233093252307	1	1
OG_1047.DioneAgraulisEueidesHeliconius	OG_1047	Nymphalidae	FBgn0026721	36919	fat-spondin	59	2462.4406779661017	409.57788403558345	2351.593220338983	407.7480993167339	012345	0.09288552993516709	DioneAgraulisEueidesHeliconius	0.0213534503588	1	1	1
OG_1047.Eueides	OG_1047	Nymphalidae	FBgn0026721	36919	fat-spondin	59	2462.4406779661017	409.57788403558345	2351.593220338983	407.7480993167339	012345	0.09288552993516709	Eueides	0.0945540227569	1	1	1
OG_10471.Heliconius	OG_10471	Nymphalidae	sp|D4ABL6|MCTP1_RAT	-	-	63	1535.8095238095239	355.4867379547063	1458.1904761904761	374.0312718079191	012345	0.1765141746492532	Heliconius	0.313594859466	1	1	1
OG_10471.EueidesHeliconius	OG_10471	Nymphalidae	sp|D4ABL6|MCTP1_RAT	-	-	63	1535.8095238095239	355.4867379547063	1458.1904761904761	374.0312718079191	012345	0.1765141746492532	EueidesHeliconius	0.324942558922	1	1	1
OG_10471.Heliconiini	OG_10471	Nymphalidae	sp|D4ABL6|MCTP1_RAT	-	-	63	1535.8095238095239	355.4867379547063	1458.1904761904761	374.0312718079191	012345	0.1765141746492532	Heliconiini	0.481250808012	0.329865067625	1	1
OG_10471.Eueides	OG_10471	Nymphalidae	sp|D4ABL6|MCTP1_RAT	-	-	63	1535.8095238095239	355.4867379547063	1458.1904761904761	374.0312718079191	012345	0.1765141746492532	Eueides	0.323019880741	1	1	1
OG_10474.Heliconius	OG_10474	Nymphalidae	FBgn0036360	39508	CG10713	63	810.952380952381	101.37599800012593	789.5238095238095	114.75382307050624	010010	0.04121207223363883	Heliconius	21.5367422776	0.00790613448749	0.0303718609366	0.0607437218733
OG_10474.EueidesHeliconius	OG_10474	Nymphalidae	FBgn0036360	39508	CG10713	63	810.952380952381	101.37599800012593	789.5238095238095	114.75382307050624	010010	0.04121207223363883	EueidesHeliconius	12.919551814	0.0129876680277	0.0189435164616	0.0757740658466
OG_10474.Heliconiini	OG_10474	Nymphalidae	FBgn0036360	39508	CG10713	63	810.952380952381	101.37599800012593	789.5238095238095	114.75382307050624	010010	0.04121207223363883	Heliconiini	767.657235457	0.0200403422619	0.0230332625349	0.0690997876046
OG_10474.DioneAgraulisEueidesHeliconius	OG_10474	Nymphalidae	FBgn0036360	39508	CG10713	63	810.952380952381	101.37599800012593	789.5238095238095	114.75382307050624	010010	0.04121207223363883	DioneAgraulisEueidesHeliconius	163.484658151	0.0222948474848	7.30305915012e-05	0.000365152957506
OG_10474.Eueides	OG_10474	Nymphalidae	FBgn0036360	39508	CG10713	63	810.952380952381	101.37599800012593	789.5238095238095	114.75382307050624	010010	0.04121207223363883	Eueides	0	1	1	1
OG_10476.Heliconius	OG_10476	Nymphalidae	FBgn0038570	3771951	Prx5	60	657.1	446.8922577087234	545.45	55.860965799026424	012310	0.06109542495327791	Heliconius	111.924730436	0.00577794768715	0.0100857554695	0.0403430218779
OG_10476.EueidesHeliconius	OG_10476	Nymphalidae	FBgn0038570	3771951	Prx5	60	657.1	446.8922577087234	545.45	55.860965799026424	012310	0.06109542495327791	EueidesHeliconius	0	1	1	1
OG_10476.Heliconiini	OG_10476	Nymphalidae	FBgn0038570	3771951	Prx5	60	657.1	446.8922577087234	545.45	55.860965799026424	012310	0.06109542495327791	Heliconiini	22.9564249918	0.0276315395596	0.0231557499457	0.0694672498372
OG_10476.Eueides	OG_10476	Nymphalidae	FBgn0038570	3771951	Prx5	60	657.1	446.8922577087234	545.45	55.860965799026424	012310	0.06109542495327791	Eueides	0.0187928676848	1	1	1
OG_10478.Heliconius	OG_10478	Nymphalidae	FBgn0265045	36753	Strn-Mlck	49	2259.795918367347	253.0936730348648	2074.285714285714	254.60966523809157	012345	0.2250408578214937	Heliconius	32.0936844529	0.00276928623698	0.108922606306	0.326767818917
OG_10478.EueidesHeliconius	OG_10478	Nymphalidae	FBgn0265045	36753	Strn-Mlck	49	2259.795918367347	253.0936730348648	2074.285714285714	254.60966523809157	012345	0.2250408578214937	EueidesHeliconius	0.0887204501066	1	1	1
OG_10478.Eueides	OG_10478	Nymphalidae	FBgn0265045	36753	Strn-Mlck	49	2259.795918367347	253.0936730348648	2074.285714285714	254.60966523809157	012345	0.2250408578214937	Eueides	0.105849004429	1	1	1
OG_10479.Eueides	OG_10479	Nymphalidae	FBgn0028482	33635	bdl	60	1892.7	370.97144094929996	1708.3	378.50536323809206	012345	0.08178993916034637	Eueides	0.0804989414832	1	1	1
OG_10485.Heliconius	OG_10485	DioneAgraulisEueidesHeliconius	-	47757	-	36	380.6666666666667	27.09038369770515	363.0833333333333	15.819072525137356	012310	0.2840866365402092	Heliconius	0.187112959589	1	1	1
OG_10485.Eueides_Etal	OG_10485	DioneAgraulisEueidesHeliconius	-	47757	-	36	380.6666666666667	27.09038369770515	363.0833333333333	15.819072525137356	012310	0.2840866365402092	Eueides	0.190168026685	1	1	1
OG_10488.Heliconius	OG_10488	Nymphalidae	sp|Q6DFI2|TM147_XENLA	-	-	57	708.6842105263158	165.57556793821044	662.7368421052631	76.83806766609426	012345	0.023805772185439	Heliconius	0.0313115109795	1	1	1
OG_10488.EueidesHeliconius	OG_10488	Nymphalidae	sp|Q6DFI2|TM147_XENLA	-	-	57	708.6842105263158	165.57556793821044	662.7368421052631	76.83806766609426	012345	0.023805772185439	EueidesHeliconius	29.905048544	0.00746316830983	0.0737007221146	0.368503610573
OG_10488.Heliconiini	OG_10488	Nymphalidae	sp|Q6DFI2|TM147_XENLA	-	-	57	708.6842105263158	165.57556793821044	662.7368421052631	76.83806766609426	012345	0.023805772185439	Heliconiini	16.8237777092	0.00820227352977	0.220996482172	0.883985928686
OG_10488.DioneAgraulisEueidesHeliconius	OG_10488	Nymphalidae	sp|Q6DFI2|TM147_XENLA	-	-	57	708.6842105263158	165.57556793821044	662.7368421052631	76.83806766609426	012345	0.023805772185439	DioneAgraulisEueidesHeliconius	0	1	1	1
OG_10488.Eueides	OG_10488	Nymphalidae	sp|Q6DFI2|TM147_XENLA	-	-	57	708.6842105263158	165.57556793821044	662.7368421052631	76.83806766609426	012345	0.023805772185439	Eueides	0	1	1	1
OG_1049.Heliconius	OG_1049	Nymphalidae	FBgn0039260	42994	Smg6	61	4269.786885245901	1033.8597284876992	4000.4262295081967	982.7593047716678	012345	0.1296627933759826	Heliconius	0.221715165723	1	1	1
OG_1049.EueidesHeliconius	OG_1049	Nymphalidae	FBgn0039260	42994	Smg6	61	4269.786885245901	1033.8597284876992	4000.4262295081967	982.7593047716678	012345	0.1296627933759826	EueidesHeliconius	4.47735848713	0.0151056189154	0.18378261531	0.918913076551
OG_1049.Heliconiini	OG_1049	Nymphalidae	FBgn0039260	42994	Smg6	61	4269.786885245901	1033.8597284876992	4000.4262295081967	982.7593047716678	012345	0.1296627933759826	Heliconiini	1.40819739645	0.109452594879	0.366051211114	1
OG_1049.DioneAgraulisEueidesHeliconius	OG_1049	Nymphalidae	FBgn0039260	42994	Smg6	61	4269.786885245901	1033.8597284876992	4000.4262295081967	982.7593047716678	012345	0.1296627933759826	DioneAgraulisEueidesHeliconius	0.264647115641	1	1	1
OG_1049.Eueides	OG_1049	Nymphalidae	FBgn0039260	42994	Smg6	61	4269.786885245901	1033.8597284876992	4000.4262295081967	982.7593047716678	012345	0.1296627933759826	Eueides	0.169401026118	1	1	1
OG_10492.Heliconius	OG_10492	Nymphalidae	sp|Q58900|Y1505_METJA	-	-	63	4287.380952380952	1041.0691608785778	3994.5714285714284	1047.1817767080308	012345	0.2268770170001003	Heliconius	1557.69953594	0.00564995811196	0.00626173990188	0.0313086995094
OG_10492.EueidesHeliconius	OG_10492	Nymphalidae	sp|Q58900|Y1505_METJA	-	-	63	4287.380952380952	1041.0691608785778	3994.5714285714284	1047.1817767080308	012345	0.2268770170001003	EueidesHeliconius	0.634804907048	0.208618707476	1	1
OG_10492.Heliconiini	OG_10492	Nymphalidae	sp|Q58900|Y1505_METJA	-	-	63	4287.380952380952	1041.0691608785778	3994.5714285714284	1047.1817767080308	012345	0.2268770170001003	Heliconiini	1.2893063765	0.177533700124	0.31984002264	1
OG_10492.DioneAgraulisEueidesHeliconius	OG_10492	Nymphalidae	sp|Q58900|Y1505_METJA	-	-	63	4287.380952380952	1041.0691608785778	3994.5714285714284	1047.1817767080308	012345	0.2268770170001003	DioneAgraulisEueidesHeliconius	0.381805536162	1	1	1
OG_10492.Eueides	OG_10492	Nymphalidae	sp|Q58900|Y1505_METJA	-	-	63	4287.380952380952	1041.0691608785778	3994.5714285714284	1047.1817767080308	012345	0.2268770170001003	Eueides	0.210768383331	1	1	1
OG_10493.Heliconius	OG_10493	Nymphalidae	sp|Q9VJ87|CWC22_DROME	-	-	60	987.5	163.10472096171833	928.0	122.8751398778451	012345	0.1739949671862295	Heliconius	0.299962882245	1	1	1
OG_10493.EueidesHeliconius	OG_10493	Nymphalidae	sp|Q9VJ87|CWC22_DROME	-	-	60	987.5	163.10472096171833	928.0	122.8751398778451	012345	0.1739949671862295	EueidesHeliconius	0.13306805366	1	1	1
OG_10493.Heliconiini	OG_10493	Nymphalidae	sp|Q9VJ87|CWC22_DROME	-	-	60	987.5	163.10472096171833	928.0	122.8751398778451	012345	0.1739949671862295	Heliconiini	0.122908354152	1	1	1
OG_10493.Eueides	OG_10493	Nymphalidae	sp|Q9VJ87|CWC22_DROME	-	-	60	987.5	163.10472096171833	928.0	122.8751398778451	012345	0.1739949671862295	Eueides	0.0519239878369	1	1	1
OG_10496.Heliconius	OG_10496	Nymphalidae	sp|Q8ZGY6|ZITB_YERPE	-	-	63	979.9047619047619	206.35496573159122	945.4761904761905	219.70383074182024	012345	0.04927936868955521	Heliconius	3846.97557061	0.00887397722913	0.000622448554163	0.00311224277081
OG_10496.EueidesHeliconius	OG_10496	Nymphalidae	sp|Q8ZGY6|ZITB_YERPE	-	-	63	979.9047619047619	206.35496573159122	945.4761904761905	219.70383074182024	012345	0.04927936868955521	EueidesHeliconius	0.0319152487286	1	1	1
OG_10496.Heliconiini	OG_10496	Nymphalidae	sp|Q8ZGY6|ZITB_YERPE	-	-	63	979.9047619047619	206.35496573159122	945.4761904761905	219.70383074182024	012345	0.04927936868955521	Heliconiini	0.0489123145358	1	1	1
OG_10496.DioneAgraulisEueidesHeliconius	OG_10496	Nymphalidae	sp|Q8ZGY6|ZITB_YERPE	-	-	63	979.9047619047619	206.35496573159122	945.4761904761905	219.70383074182024	012345	0.04927936868955521	DioneAgraulisEueidesHeliconius	0.0405594255898	1	1	1
OG_10496.Eueides	OG_10496	Nymphalidae	sp|Q8ZGY6|ZITB_YERPE	-	-	63	979.9047619047619	206.35496573159122	945.4761904761905	219.70383074182024	012345	0.04927936868955521	Eueides	0.0450159640992	1	1	1
OG_10499.Heliconius	OG_10499	Nymphalidae	FBgn0259985	36285	Mppe	60	973.2	187.47095775079404	909.75	183.70080974236342	010020	0.1247452307341416	Heliconius	0.12148366092	1	1	1
OG_10499.Heliconiini	OG_10499	Nymphalidae	FBgn0259985	36285	Mppe	60	973.2	187.47095775079404	909.75	183.70080974236342	010020	0.1247452307341416	Heliconiini	0.549331029276	0.211099368284	1	1
OG_10499.Eueides	OG_10499	Nymphalidae	FBgn0259985	36285	Mppe	60	973.2	187.47095775079404	909.75	183.70080974236342	010020	0.1247452307341416	Eueides	0	1	1	1
OG_105.Heliconius	OG_105	Nymphalidae	FBgn0015621	33259	Clp	61	1457.360655737705	253.0254981505305	1330.327868852459	214.81541609907532	012345	0.1030755257878238	Heliconius	0.0861111152589	1	1	1
OG_105.EueidesHeliconius	OG_105	Nymphalidae	FBgn0015621	33259	Clp	61	1457.360655737705	253.0254981505305	1330.327868852459	214.81541609907532	012345	0.1030755257878238	EueidesHeliconius	0.0252955156865	1	1	1
OG_105.Heliconiini	OG_105	Nymphalidae	FBgn0015621	33259	Clp	61	1457.360655737705	253.0254981505305	1330.327868852459	214.81541609907532	012345	0.1030755257878238	Heliconiini	1.74502408501	0.0635491563277	0.224448689479	1
OG_105.DioneAgraulisEueidesHeliconius	OG_105	Nymphalidae	FBgn0015621	33259	Clp	61	1457.360655737705	253.0254981505305	1330.327868852459	214.81541609907532	012345	0.1030755257878238	DioneAgraulisEueidesHeliconius	0.192394807071	1	1	1
OG_105.Eueides	OG_105	Nymphalidae	FBgn0015621	33259	Clp	61	1457.360655737705	253.0254981505305	1330.327868852459	214.81541609907532	012345	0.1030755257878238	Eueides	0.156865085048	0.02318479526	1	1
OG_10500.Heliconius	OG_10500	Nymphalidae	sp|Q5ZL67|NF2L1_CHICK	-	-	59	716.7457627118644	108.91741440197472	680.6949152542373	121.84391992054009	012345	0.1140212372168015	Heliconius	0.242753675186	1	1	1
OG_10500.EueidesHeliconius	OG_10500	Nymphalidae	sp|Q5ZL67|NF2L1_CHICK	-	-	59	716.7457627118644	108.91741440197472	680.6949152542373	121.84391992054009	012345	0.1140212372168015	EueidesHeliconius	0.369025594595	1	1	1
OG_10500.Heliconiini	OG_10500	Nymphalidae	sp|Q5ZL67|NF2L1_CHICK	-	-	59	716.7457627118644	108.91741440197472	680.6949152542373	121.84391992054009	012345	0.1140212372168015	Heliconiini	3.69103100442	0.118721291531	0.216982563958	0.650947691875
OG_10500.DioneAgraulisEueidesHeliconius	OG_10500	Nymphalidae	sp|Q5ZL67|NF2L1_CHICK	-	-	59	716.7457627118644	108.91741440197472	680.6949152542373	121.84391992054009	012345	0.1140212372168015	DioneAgraulisEueidesHeliconius	3846.11684068	0.0144187879723	0.00165947055022	0.00829735275108
OG_10500.Eueides	OG_10500	Nymphalidae	sp|Q5ZL67|NF2L1_CHICK	-	-	59	716.7457627118644	108.91741440197472	680.6949152542373	121.84391992054009	012345	0.1140212372168015	Eueides	11.7897351552	0.0237411443923	0.206395580832	0.825582323327
OG_10504.Heliconius	OG_10504	Heliconiini	FBgn0051626	318859	CG31626	48	730.8125	85.73375848375015	707.875	17.233234606422556	012310	0.1644536762317987	Heliconius	7704.95156922	0.00871158653014	0.00765121830087	0.0306048732035
OG_10504.EueidesHeliconius	OG_10504	Heliconiini	FBgn0051626	318859	CG31626	48	730.8125	85.73375848375015	707.875	17.233234606422556	012310	0.1644536762317987	EueidesHeliconius	0.064620685473	1	1	1
OG_10504.DioneAgraulisEueidesHeliconius	OG_10504	Heliconiini	FBgn0051626	318859	CG31626	48	730.8125	85.73375848375015	707.875	17.233234606422556	012310	0.1644536762317987	DioneAgraulisEueidesHeliconius	0.291114494394	1	1	1
OG_10504.Eueides	OG_10504	Heliconiini	FBgn0051626	318859	CG31626	48	730.8125	85.73375848375015	707.875	17.233234606422556	012310	0.1644536762317987	Eueides	0.103983842023	1	1	1
OG_10506.Heliconius	OG_10506	Heliconiinae	sp|A2ASS6|TITIN_MOUSE	-	-	57	1009.0526315789474	98.32142438489585	972.4736842105264	115.06262295904811	012345	0.3386874519306801	Heliconius	0.604652240514	1	1	1
OG_10506.EueidesHeliconius	OG_10506	Heliconiinae	sp|A2ASS6|TITIN_MOUSE	-	-	57	1009.0526315789474	98.32142438489585	972.4736842105264	115.06262295904811	012345	0.3386874519306801	EueidesHeliconius	209.448756189	0.00764497707718	0.125657298194	0.376971894581
OG_10506.DioneAgraulisEueidesHeliconius	OG_10506	Heliconiinae	sp|A2ASS6|TITIN_MOUSE	-	-	57	1009.0526315789474	98.32142438489585	972.4736842105264	115.06262295904811	012345	0.3386874519306801	DioneAgraulisEueidesHeliconius	0.133117244909	1	1	1
OG_10506.Eueides	OG_10506	Heliconiinae	sp|A2ASS6|TITIN_MOUSE	-	-	57	1009.0526315789474	98.32142438489585	972.4736842105264	115.06262295904811	012345	0.3386874519306801	Eueides	87.9145709099	0.0157402422555	0.0558263980245	0.223305592098
OG_10508.Heliconius	OG_10508	Nymphalidae	sp|O88940|MUSC_MOUSE	-	-	59	624.0	78.65048191260334	589.9830508474577	91.37193344348583	010020	0.11584500336887	Heliconius	0.0195043048904	1	1	1
OG_10508.Heliconiini	OG_10508	Nymphalidae	sp|O88940|MUSC_MOUSE	-	-	59	624.0	78.65048191260334	589.9830508474577	91.37193344348583	010020	0.11584500336887	Heliconiini	0.0490871464338	1	1	1
OG_10508.Eueides	OG_10508	Nymphalidae	sp|O88940|MUSC_MOUSE	-	-	59	624.0	78.65048191260334	589.9830508474577	91.37193344348583	010020	0.11584500336887	Eueides	0.0378832203278	1	1	1
OG_10513.EueidesHeliconius	OG_10513	Heliconiini	FBgn0052405	318014	Cpr65Av	48	326.5	17.878059178781125	319.625	4.741769184597665	012345	0.184345498349896	EueidesHeliconius	0.0493359644984	1	1	1
OG_10513.DioneAgraulisEueidesHeliconius	OG_10513	Heliconiini	FBgn0052405	318014	Cpr65Av	48	326.5	17.878059178781125	319.625	4.741769184597665	012345	0.184345498349896	DioneAgraulisEueidesHeliconius	0	1	1	1
OG_10513.Eueides	OG_10513	Heliconiini	FBgn0052405	318014	Cpr65Av	48	326.5	17.878059178781125	319.625	4.741769184597665	012345	0.184345498349896	Eueides	0.147889507703	1	1	1
OG_10519.Heliconius	OG_10519	Nymphalidae	sp|Q53HC0|CCD92_HUMAN	-	-	62	1174.5483870967741	274.727294545639	1003.741935483871	243.4360176576755	012345	0.1169227458985058	Heliconius	0.0852365326676	1	1	1
OG_10519.EueidesHeliconius	OG_10519	Nymphalidae	sp|Q53HC0|CCD92_HUMAN	-	-	62	1174.5483870967741	274.727294545639	1003.741935483871	243.4360176576755	012345	0.1169227458985058	EueidesHeliconius	0.0720733579045	1	1	1
OG_10519.Heliconiini	OG_10519	Nymphalidae	sp|Q53HC0|CCD92_HUMAN	-	-	62	1174.5483870967741	274.727294545639	1003.741935483871	243.4360176576755	012345	0.1169227458985058	Heliconiini	0.114053292073	1	1	1
OG_10519.DioneAgraulisEueidesHeliconius	OG_10519	Nymphalidae	sp|Q53HC0|CCD92_HUMAN	-	-	62	1174.5483870967741	274.727294545639	1003.741935483871	243.4360176576755	012345	0.1169227458985058	DioneAgraulisEueidesHeliconius	0	1	1	1
OG_10519.Eueides	OG_10519	Nymphalidae	sp|Q53HC0|CCD92_HUMAN	-	-	62	1174.5483870967741	274.727294545639	1003.741935483871	243.4360176576755	012345	0.1169227458985058	Eueides	0.137539285119	1	1	1
OG_10521.Heliconius	OG_10521	Nymphalidae	sp|O43704|ST1B1_HUMAN	-	-	61	938.2622950819672	301.4138759976271	858.983606557377	229.03027874871495	010020	0.08178464942261489	Heliconius	0.0248070582823	1	1	1
OG_10521.EueidesHeliconius	OG_10521	Nymphalidae	sp|O43704|ST1B1_HUMAN	-	-	61	938.2622950819672	301.4138759976271	858.983606557377	229.03027874871495	010020	0.08178464942261489	EueidesHeliconius	0.0322310117803	1	1	1
OG_10521.DioneAgraulisEueidesHeliconius	OG_10521	Nymphalidae	sp|O43704|ST1B1_HUMAN	-	-	61	938.2622950819672	301.4138759976271	858.983606557377	229.03027874871495	010020	0.08178464942261489	DioneAgraulisEueidesHeliconius	0.0249415226224	1	1	1
OG_10521.Eueides	OG_10521	Nymphalidae	sp|O43704|ST1B1_HUMAN	-	-	61	938.2622950819672	301.4138759976271	858.983606557377	229.03027874871495	010020	0.08178464942261489	Eueides	0.0404055597301	1	1	1
OG_10525.Heliconius	OG_10525	Nymphalidae	sp|P23359|BMP7_MOUSE	-	-	61	1345.4262295081967	167.99087202138304	1211.1147540983607	159.13991146679967	012345	0.1434875627782715	Heliconius	0.131900158637	1	1	1
OG_10525.EueidesHeliconius	OG_10525	Nymphalidae	sp|P23359|BMP7_MOUSE	-	-	61	1345.4262295081967	167.99087202138304	1211.1147540983607	159.13991146679967	012345	0.1434875627782715	EueidesHeliconius	0.0613705530504	1	1	1
OG_10525.Heliconiini	OG_10525	Nymphalidae	sp|P23359|BMP7_MOUSE	-	-	61	1345.4262295081967	167.99087202138304	1211.1147540983607	159.13991146679967	012345	0.1434875627782715	Heliconiini	0.0499694220262	1	1	1
OG_10525.DioneAgraulisEueidesHeliconius	OG_10525	Nymphalidae	sp|P23359|BMP7_MOUSE	-	-	61	1345.4262295081967	167.99087202138304	1211.1147540983607	159.13991146679967	012345	0.1434875627782715	DioneAgraulisEueidesHeliconius	0	1	1	1
OG_10525.Eueides	OG_10525	Nymphalidae	sp|P23359|BMP7_MOUSE	-	-	61	1345.4262295081967	167.99087202138304	1211.1147540983607	159.13991146679967	012345	0.1434875627782715	Eueides	6.11472962228	0.0371079730004	0.0561035733382	0.280517866691
OG_10526.Heliconius	OG_10526	Nymphalidae	sp|P0CW91|RADA_AERPX	-	-	56	769.1785714285714	79.12650520862535	756.2678571428571	82.47715940779963	012345	0.2274262271416011	Heliconius	0.407558391371	1	1	1
OG_10526.EueidesHeliconius	OG_10526	Nymphalidae	sp|P0CW91|RADA_AERPX	-	-	56	769.1785714285714	79.12650520862535	756.2678571428571	82.47715940779963	012345	0.2274262271416011	EueidesHeliconius	0.177180041657	1	1	1
OG_10526.Heliconiini	OG_10526	Nymphalidae	sp|P0CW91|RADA_AERPX	-	-	56	769.1785714285714	79.12650520862535	756.2678571428571	82.47715940779963	012345	0.2274262271416011	Heliconiini	0.300008645362	1	1	1
OG_10526.DioneAgraulisEueidesHeliconius	OG_10526	Nymphalidae	sp|P0CW91|RADA_AERPX	-	-	56	769.1785714285714	79.12650520862535	756.2678571428571	82.47715940779963	012345	0.2274262271416011	DioneAgraulisEueidesHeliconius	0.100408690186	1	1	1
OG_10526.Eueides	OG_10526	Nymphalidae	sp|P0CW91|RADA_AERPX	-	-	56	769.1785714285714	79.12650520862535	756.2678571428571	82.47715940779963	012345	0.2274262271416011	Eueides	0.274454244299	1	1	1
OG_10528.Heliconius	OG_10528	Nymphalidae	sp|Q9Y2X8|UB2D4_HUMAN	-	-	61	547.5245901639345	139.65221515823703	447.5409836065574	70.75670014511672	012310	0.08108037157229159	Heliconius	0.0203115948198	1	1	1
OG_10528.EueidesHeliconius	OG_10528	Nymphalidae	sp|Q9Y2X8|UB2D4_HUMAN	-	-	61	547.5245901639345	139.65221515823703	447.5409836065574	70.75670014511672	012310	0.08108037157229159	EueidesHeliconius	0.106830287318	1	1	1
OG_10528.Heliconiini	OG_10528	Nymphalidae	sp|Q9Y2X8|UB2D4_HUMAN	-	-	61	547.5245901639345	139.65221515823703	447.5409836065574	70.75670014511672	012310	0.08108037157229159	Heliconiini	0.167046681566	1	1	1
OG_10528.DioneAgraulisEueidesHeliconius	OG_10528	Nymphalidae	sp|Q9Y2X8|UB2D4_HUMAN	-	-	61	547.5245901639345	139.65221515823703	447.5409836065574	70.75670014511672	012310	0.08108037157229159	DioneAgraulisEueidesHeliconius	0.0722311600375	1	1	1
OG_10528.Eueides	OG_10528	Nymphalidae	sp|Q9Y2X8|UB2D4_HUMAN	-	-	61	547.5245901639345	139.65221515823703	447.5409836065574	70.75670014511672	012310	0.08108037157229159	Eueides	0.0350612417666	1	1	1
OG_1053.Heliconius	OG_1053	Nymphalidae	FBgn0039488	43267	CG6066	60	1420.85	982.1129912082417	990.65	156.81048274908156	012345	0.08117531064616028	Heliconius	1.8302875915	0.0261219415425	0.375333233064	1
OG_1053.EueidesHeliconius	OG_1053	Nymphalidae	FBgn0039488	43267	CG6066	60	1420.85	982.1129912082417	990.65	156.81048274908156	012345	0.08117531064616028	EueidesHeliconius	0.0275984869395	1	1	1
OG_1053.Heliconiini	OG_1053	Nymphalidae	FBgn0039488	43267	CG6066	60	1420.85	982.1129912082417	990.65	156.81048274908156	012345	0.08117531064616028	Heliconiini	2.36131324025	0.0445748407067	0.271637069515	1
OG_1053.DioneAgraulisEueidesHeliconius	OG_1053	Nymphalidae	FBgn0039488	43267	CG6066	60	1420.85	982.1129912082417	990.65	156.81048274908156	012345	0.08117531064616028	DioneAgraulisEueidesHeliconius	1.82821853133	0.0672771525077	0.369789453683	1
OG_1053.Eueides	OG_1053	Nymphalidae	FBgn0039488	43267	CG6066	60	1420.85	982.1129912082417	990.65	156.81048274908156	012345	0.08117531064616028	Eueides	0.0872790697765	1	1	1
OG_10534.Heliconius	OG_10534	Nymphalidae	sp|Q9UEG4|ZN629_HUMAN	-	-	61	1881.0983606557377	818.1145397566572	1492.27868852459	471.0970848098222	012345	0.1439352085605977	Heliconius	2.55741269122	0.0388143718358	0.0608551431051	0.12171028621
OG_10534.EueidesHeliconius	OG_10534	Nymphalidae	sp|Q9UEG4|ZN629_HUMAN	-	-	61	1881.0983606557377	818.1145397566572	1492.27868852459	471.0970848098222	012345	0.1439352085605977	EueidesHeliconius	3.91837218055	0.142261484318	0.0821882827206	0.0821882827206
OG_10534.Heliconiini	OG_10534	Nymphalidae	sp|Q9UEG4|ZN629_HUMAN	-	-	61	1881.0983606557377	818.1145397566572	1492.27868852459	471.0970848098222	012345	0.1439352085605977	Heliconiini	27.4209519299	0.03041956883	0.00561831737486	0.0280915868743
OG_10534.DioneAgraulisEueidesHeliconius	OG_10534	Nymphalidae	sp|Q9UEG4|ZN629_HUMAN	-	-	61	1881.0983606557377	818.1145397566572	1492.27868852459	471.0970848098222	012345	0.1439352085605977	DioneAgraulisEueidesHeliconius	19.789263507	0.116963169223	0.0191772668801	0.0767090675206
OG_10534.Eueides	OG_10534	Nymphalidae	sp|Q9UEG4|ZN629_HUMAN	-	-	61	1881.0983606557377	818.1145397566572	1492.27868852459	471.0970848098222	012345	0.1439352085605977	Eueides	1557.69953594	0.00326254776217	0.0597431722102	0.179229516631
OG_10535.DioneAgraulisEueidesHeliconius	OG_10535	Heliconiini	-	47757	-	41	435.2926829268293	72.23682052210886	407.5609756097561	59.77480045788437	012310	0.1572392594582441	DioneAgraulisEueidesHeliconius	0.019176999013	1	1	1
OG_10535.Eueides	OG_10535	Heliconiini	-	47757	-	41	435.2926829268293	72.23682052210886	407.5609756097561	59.77480045788437	012310	0.1572392594582441	Eueides	0	1	1	1
OG_10536.Heliconius	OG_10536	Nymphalidae	sp|Q8YRI1|YY46_NOSS1	-	-	61	997.9180327868852	148.75453376002648	961.3770491803278	154.05238239780715	012345	0.03383199556301364	Heliconius	6.37863160018	0.00371839631778	0.14080853515	0.2816170703
OG_10536.EueidesHeliconius	OG_10536	Nymphalidae	sp|Q8YRI1|YY46_NOSS1	-	-	61	997.9180327868852	148.75453376002648	961.3770491803278	154.05238239780715	012345	0.03383199556301364	EueidesHeliconius	0	1	1	1
OG_10536.Heliconiini	OG_10536	Nymphalidae	sp|Q8YRI1|YY46_NOSS1	-	-	61	997.9180327868852	148.75453376002648	961.3770491803278	154.05238239780715	012345	0.03383199556301364	Heliconiini	3043.53992585	0.00611668503387	0.000247257055135	0.00123628527567
OG_10536.DioneAgraulisEueidesHeliconius	OG_10536	Nymphalidae	sp|Q8YRI1|YY46_NOSS1	-	-	61	997.9180327868852	148.75453376002648	961.3770491803278	154.05238239780715	012345	0.03383199556301364	DioneAgraulisEueidesHeliconius	11.4172177981	0.00693733452139	0.0870824277052	0.261247283116
OG_10536.Eueides	OG_10536	Nymphalidae	sp|Q8YRI1|YY46_NOSS1	-	-	61	997.9180327868852	148.75453376002648	961.3770491803278	154.05238239780715	012345	0.03383199556301364	Eueides	23.1633660488	0.00664743430615	0.0750340581822	0.300136232729
OG_10539.Heliconius	OG_10539	Nymphalidae	sp|Q2KI99|STING_BOVIN	-	-	57	839.8421052631579	156.91776698502903	795.5263157894736	153.18422634924283	012345	0.1440045503056422	Heliconius	0.108385853571	1	1	1
OG_10539.EueidesHeliconius	OG_10539	Nymphalidae	sp|Q2KI99|STING_BOVIN	-	-	57	839.8421052631579	156.91776698502903	795.5263157894736	153.18422634924283	012345	0.1440045503056422	EueidesHeliconius	0.429603064574	1	1	1
OG_10539.Eueides	OG_10539	Nymphalidae	sp|Q2KI99|STING_BOVIN	-	-	57	839.8421052631579	156.91776698502903	795.5263157894736	153.18422634924283	012345	0.1440045503056422	Eueides	34.8496137981	0.0140919681498	0.170166728452	0.510500185356
OG_10540.Heliconius	OG_10540	Heliconiini	sp|Q01H83|SELK_XENTR	-	-	43	270.4186046511628	1.2244136354500637	269.72093023255815	0.8713950695439624	012345	0.07841035300308613	Heliconius	0.0635286193477	1	1	1
OG_10540.EueidesHeliconius	OG_10540	Heliconiini	sp|Q01H83|SELK_XENTR	-	-	43	270.4186046511628	1.2244136354500637	269.72093023255815	0.8713950695439624	012345	0.07841035300308613	EueidesHeliconius	0.0643250012244	1	1	1
OG_10540.Eueides	OG_10540	Heliconiini	sp|Q01H83|SELK_XENTR	-	-	43	270.4186046511628	1.2244136354500637	269.72093023255815	0.8713950695439624	012345	0.07841035300308613	Eueides	0.035308641501	1	1	1
OG_10542.Heliconius	OG_10542	Nymphalidae	sp|Q9N5K3|SYP4_CAEEL	-	-	62	1063.5967741935483	195.06454346863356	969.1935483870968	157.81684348449298	012345	0.07408973918759808	Heliconius	0.0648794109515	1	1	1
OG_10542.Eueides	OG_10542	Nymphalidae	sp|Q9N5K3|SYP4_CAEEL	-	-	62	1063.5967741935483	195.06454346863356	969.1935483870968	157.81684348449298	012345	0.07408973918759808	Eueides	15.9903211067	0.00674580132449	0.249259533486	0.498519066971
OG_10548.Heliconius	OG_10548	Nymphalidae	sp|Q9V9I4|OR42B_DROME	-	-	58	2239.396551724138	1857.454031915128	1077.6206896551723	158.01100219072555	012345	0.200131206463701	Heliconius	0.217454261197	1	1	1
OG_10548.EueidesHeliconius	OG_10548	Nymphalidae	sp|Q9V9I4|OR42B_DROME	-	-	58	2239.396551724138	1857.454031915128	1077.6206896551723	158.01100219072555	012345	0.200131206463701	EueidesHeliconius	0.154470135931	1	1	1
OG_10548.Heliconiini	OG_10548	Nymphalidae	sp|Q9V9I4|OR42B_DROME	-	-	58	2239.396551724138	1857.454031915128	1077.6206896551723	158.01100219072555	012345	0.200131206463701	Heliconiini	1.02740417293	0.152496877892	0.491054967443	1
OG_10548.Eueides	OG_10548	Nymphalidae	sp|Q9V9I4|OR42B_DROME	-	-	58	2239.396551724138	1857.454031915128	1077.6206896551723	158.01100219072555	012345	0.200131206463701	Eueides	1.12174823231	0.183536138514	0.465962356225	1
OG_10551.Heliconius	OG_10551	Nymphalidae	sp|Q292G3|KTU_DROPS	-	-	62	2388.3387096774195	361.86938222497275	2296.064516129032	367.811262565364	012345	0.1490471441588528	Heliconius	0.11678183879	1	1	1
OG_10551.EueidesHeliconius	OG_10551	Nymphalidae	sp|Q292G3|KTU_DROPS	-	-	62	2388.3387096774195	361.86938222497275	2296.064516129032	367.811262565364	012345	0.1490471441588528	EueidesHeliconius	880.618056944	0.00384463998717	0.0154674058163	0.0773370290817
OG_10551.Heliconiini	OG_10551	Nymphalidae	sp|Q292G3|KTU_DROPS	-	-	62	2388.3387096774195	361.86938222497275	2296.064516129032	367.811262565364	012345	0.1490471441588528	Heliconiini	3.21511946444	0.0355292680517	0.5	1
OG_10551.DioneAgraulisEueidesHeliconius	OG_10551	Nymphalidae	sp|Q292G3|KTU_DROPS	-	-	62	2388.3387096774195	361.86938222497275	2296.064516129032	367.811262565364	012345	0.1490471441588528	DioneAgraulisEueidesHeliconius	0.0994304281773	1	1	1
OG_10551.Eueides	OG_10551	Nymphalidae	sp|Q292G3|KTU_DROPS	-	-	62	2388.3387096774195	361.86938222497275	2296.064516129032	367.811262565364	012345	0.1490471441588528	Eueides	2.29454190578	0.0870241680427	0.246549183405	0.986196733621
OG_10554.Heliconius	OG_10554	Heliconiinae	sp|B5ZY09|CLPX_RHILW	-	-	57	658.8421052631579	74.72846506054242	597.5263157894736	42.1767813663702	012345	0.3415467470447939	Heliconius	0.0632080009023	1	1	1
OG_10554.EueidesHeliconius	OG_10554	Heliconiinae	sp|B5ZY09|CLPX_RHILW	-	-	57	658.8421052631579	74.72846506054242	597.5263157894736	42.1767813663702	012345	0.3415467470447939	EueidesHeliconius	0.133032110897	1	1	1
OG_10554.DioneAgraulisEueidesHeliconius	OG_10554	Heliconiinae	sp|B5ZY09|CLPX_RHILW	-	-	57	658.8421052631579	74.72846506054242	597.5263157894736	42.1767813663702	012345	0.3415467470447939	DioneAgraulisEueidesHeliconius	0	1	1	1
OG_10554.Eueides	OG_10554	Heliconiinae	sp|B5ZY09|CLPX_RHILW	-	-	57	658.8421052631579	74.72846506054242	597.5263157894736	42.1767813663702	012345	0.3415467470447939	Eueides	0.37363261318	1	1	1
OG_10555.Heliconius	OG_10555	Nymphalidae	sp|Q7M4I6|PA2_BOMPE	-	-	59	575.6440677966102	143.02112712390436	528.2542372881356	80.6523389008712	012345	0.1695512194700819	Heliconius	0.189257583031	1	1	1
OG_10555.EueidesHeliconius	OG_10555	Nymphalidae	sp|Q7M4I6|PA2_BOMPE	-	-	59	575.6440677966102	143.02112712390436	528.2542372881356	80.6523389008712	012345	0.1695512194700819	EueidesHeliconius	0.261240891126	1	1	1
OG_10555.Heliconiini	OG_10555	Nymphalidae	sp|Q7M4I6|PA2_BOMPE	-	-	59	575.6440677966102	143.02112712390436	528.2542372881356	80.6523389008712	012345	0.1695512194700819	Heliconiini	692.217310856	0.0341148136721	0.183138356845	0.732553427379
OG_10555.Eueides	OG_10555	Nymphalidae	sp|Q7M4I6|PA2_BOMPE	-	-	59	575.6440677966102	143.02112712390436	528.2542372881356	80.6523389008712	012345	0.1695512194700819	Eueides	0.163148052321	1	1	1
OG_10556.Heliconius	OG_10556	Nymphalidae	sp|Q4U2R8|S22A6_HUMAN	-	-	62	1553.8548387096773	338.9599294413861	1418.3709677419354	289.05910958582047	012345	0.08397187692066273	Heliconius	0.0314991824162	1	1	1
OG_10556.EueidesHeliconius	OG_10556	Nymphalidae	sp|Q4U2R8|S22A6_HUMAN	-	-	62	1553.8548387096773	338.9599294413861	1418.3709677419354	289.05910958582047	012345	0.08397187692066273	EueidesHeliconius	0.0247722994725	1	1	1
OG_10556.Heliconiini	OG_10556	Nymphalidae	sp|Q4U2R8|S22A6_HUMAN	-	-	62	1553.8548387096773	338.9599294413861	1418.3709677419354	289.05910958582047	012345	0.08397187692066273	Heliconiini	1.27031996319	0.0776139308966	0.5	1
OG_10556.DioneAgraulisEueidesHeliconius	OG_10556	Nymphalidae	sp|Q4U2R8|S22A6_HUMAN	-	-	62	1553.8548387096773	338.9599294413861	1418.3709677419354	289.05910958582047	012345	0.08397187692066273	DioneAgraulisEueidesHeliconius	0.045640655732	1	1	1
OG_10556.Eueides	OG_10556	Nymphalidae	sp|Q4U2R8|S22A6_HUMAN	-	-	62	1553.8548387096773	338.9599294413861	1418.3709677419354	289.05910958582047	012345	0.08397187692066273	Eueides	0.0815905626135	1	1	1
OG_10560.Heliconius	OG_10560	Nymphalidae	FBgn0030973	32885	CG7332	61	1428.639344262295	165.1935807099257	1365.983606557377	157.952835023341	012345	0.0279221237643029	Heliconius	0.03345779	1	1	1
OG_10560.EueidesHeliconius	OG_10560	Nymphalidae	FBgn0030973	32885	CG7332	61	1428.639344262295	165.1935807099257	1365.983606557377	157.952835023341	012345	0.0279221237643029	EueidesHeliconius	0	1	1	1
OG_10560.Heliconiini	OG_10560	Nymphalidae	FBgn0030973	32885	CG7332	61	1428.639344262295	165.1935807099257	1365.983606557377	157.952835023341	012345	0.0279221237643029	Heliconiini	0	1	1	1
OG_10560.DioneAgraulisEueidesHeliconius	OG_10560	Nymphalidae	FBgn0030973	32885	CG7332	61	1428.639344262295	165.1935807099257	1365.983606557377	157.952835023341	012345	0.0279221237643029	DioneAgraulisEueidesHeliconius	0.0174964359826	1	1	1
OG_10560.Eueides	OG_10560	Nymphalidae	FBgn0030973	32885	CG7332	61	1428.639344262295	165.1935807099257	1365.983606557377	157.952835023341	012345	0.0279221237643029	Eueides	0.013345590633	1	1	1
OG_10561.Heliconius	OG_10561	Nymphalidae	sp|Q9Y7L0|SEC22_SCHPO	-	-	58	633.4137931034483	133.10444880810303	605.3275862068965	93.75782963737767	012310	0.01781686847811475	Heliconius	0	1	1	1
OG_10561.Heliconiini	OG_10561	Nymphalidae	sp|Q9Y7L0|SEC22_SCHPO	-	-	58	633.4137931034483	133.10444880810303	605.3275862068965	93.75782963737767	012310	0.01781686847811475	Heliconiini	0.124943132408	1	1	1
OG_10561.DioneAgraulisEueidesHeliconius	OG_10561	Nymphalidae	sp|Q9Y7L0|SEC22_SCHPO	-	-	58	633.4137931034483	133.10444880810303	605.3275862068965	93.75782963737767	012310	0.01781686847811475	DioneAgraulisEueidesHeliconius	0	1	1	1
OG_10561.Eueides	OG_10561	Nymphalidae	sp|Q9Y7L0|SEC22_SCHPO	-	-	58	633.4137931034483	133.10444880810303	605.3275862068965	93.75782963737767	012310	0.01781686847811475	Eueides	0	1	1	1
OG_10562.Heliconius	OG_10562	Nymphalidae	sp|Q96RS6|NUDC1_HUMAN	-	-	61	1696.72131147541	200.9662014767283	1676.360655737705	190.65211927271244	012345	0.08746293595683863	Heliconius	2.58026890852	0.0290619738823	0.294694660081	1
OG_10562.EueidesHeliconius	OG_10562	Nymphalidae	sp|Q96RS6|NUDC1_HUMAN	-	-	61	1696.72131147541	200.9662014767283	1676.360655737705	190.65211927271244	012345	0.08746293595683863	EueidesHeliconius	0.0370151885711	1	1	1
OG_10562.Heliconiini	OG_10562	Nymphalidae	sp|Q96RS6|NUDC1_HUMAN	-	-	61	1696.72131147541	200.9662014767283	1676.360655737705	190.65211927271244	012345	0.08746293595683863	Heliconiini	0.0544406165955	1	1	1
OG_10562.Eueides	OG_10562	Nymphalidae	sp|Q96RS6|NUDC1_HUMAN	-	-	61	1696.72131147541	200.9662014767283	1676.360655737705	190.65211927271244	012345	0.08746293595683863	Eueides	0.0696406722074	1	1	1
OG_10564.Heliconius	OG_10564	Nymphalidae	sp|P20105|E74EA_DROME	-	-	47	1053.9574468085107	311.57137479794443	955.1489361702128	312.9208300882567	012345	0.02595986802335221	Heliconius	0.0291553099856	1	1	1
OG_10564.EueidesHeliconius	OG_10564	Nymphalidae	sp|P20105|E74EA_DROME	-	-	47	1053.9574468085107	311.57137479794443	955.1489361702128	312.9208300882567	012345	0.02595986802335221	EueidesHeliconius	0	1	1	1
OG_10564.Eueides	OG_10564	Nymphalidae	sp|P20105|E74EA_DROME	-	-	47	1053.9574468085107	311.57137479794443	955.1489361702128	312.9208300882567	012345	0.02595986802335221	Eueides	0	1	1	1
OG_10568.Heliconius	OG_10568	Nymphalidae	FBgn0032518	34754	RpL24	58	517.448275862069	392.94283924105355	456.82758620689657	28.79004732903518	012345	0.02447727532267248	Heliconius	0.0404026972883	1	1	1
OG_10568.EueidesHeliconius	OG_10568	Nymphalidae	FBgn0032518	34754	RpL24	58	517.448275862069	392.94283924105355	456.82758620689657	28.79004732903518	012345	0.02447727532267248	EueidesHeliconius	0	1	1	1
OG_10568.Heliconiini	OG_10568	Nymphalidae	FBgn0032518	34754	RpL24	58	517.448275862069	392.94283924105355	456.82758620689657	28.79004732903518	012345	0.02447727532267248	Heliconiini	0	1	1	1
OG_10568.Eueides	OG_10568	Nymphalidae	FBgn0032518	34754	RpL24	58	517.448275862069	392.94283924105355	456.82758620689657	28.79004732903518	012345	0.02447727532267248	Eueides	0	1	1	1
OG_10571.Heliconius	OG_10571	Heliconiini	-	47757	-	45	497.1333333333333	130.5781332723396	339.73333333333335	18.827167132158312	010020	0.2380516475512035	Heliconius	100000	0.0172588406208	0.0734752831883	0.293901132753
OG_10571.EueidesHeliconius	OG_10571	Heliconiini	-	47757	-	45	497.1333333333333	130.5781332723396	339.73333333333335	18.827167132158312	010020	0.2380516475512035	EueidesHeliconius	0.317284681926	1	1	1
OG_10571.DioneAgraulisEueidesHeliconius	OG_10571	Heliconiini	-	47757	-	45	497.1333333333333	130.5781332723396	339.73333333333335	18.827167132158312	010020	0.2380516475512035	DioneAgraulisEueidesHeliconius	0	1	1	1
OG_10571.Eueides	OG_10571	Heliconiini	-	47757	-	45	497.1333333333333	130.5781332723396	339.73333333333335	18.827167132158312	010020	0.2380516475512035	Eueides	0.27914929555	1	1	1
OG_10577.Heliconius	OG_10577	Nymphalidae	sp|P39429|TRAF2_MOUSE	-	-	63	1467.7142857142858	282.54188781019167	1411.3333333333333	265.7575574938169	012345	0.05990550074584117	Heliconius	0.0590919323193	1	1	1
OG_10577.EueidesHeliconius	OG_10577	Nymphalidae	sp|P39429|TRAF2_MOUSE	-	-	63	1467.7142857142858	282.54188781019167	1411.3333333333333	265.7575574938169	012345	0.05990550074584117	EueidesHeliconius	0.0252515727156	1	1	1
OG_10577.Heliconiini	OG_10577	Nymphalidae	sp|P39429|TRAF2_MOUSE	-	-	63	1467.7142857142858	282.54188781019167	1411.3333333333333	265.7575574938169	012345	0.05990550074584117	Heliconiini	0.103101406368	1	1	1
OG_10577.Eueides	OG_10577	Nymphalidae	sp|P39429|TRAF2_MOUSE	-	-	63	1467.7142857142858	282.54188781019167	1411.3333333333333	265.7575574938169	012345	0.05990550074584117	Eueides	0.00468231487041	1	1	1
OG_10578.Heliconius	OG_10578	Nymphalidae	FBgn0030336	32135	CG1578	63	1956.0	509.12501972922695	1808.2380952380952	504.5691141258105	012345	0.1086746826017952	Heliconius	2.22977562207	0.0539283165835	0.5	1
OG_10578.EueidesHeliconius	OG_10578	Nymphalidae	FBgn0030336	32135	CG1578	63	1956.0	509.12501972922695	1808.2380952380952	504.5691141258105	012345	0.1086746826017952	EueidesHeliconius	9090.0	0.0107232033559	0.00147496563706	0.00737482818528
OG_10578.Heliconiini	OG_10578	Nymphalidae	FBgn0030336	32135	CG1578	63	1956.0	509.12501972922695	1808.2380952380952	504.5691141258105	012345	0.1086746826017952	Heliconiini	8.0181296434	0.0228542008849	0.0216888503798	0.0867554015194
OG_10578.DioneAgraulisEueidesHeliconius	OG_10578	Nymphalidae	FBgn0030336	32135	CG1578	63	1956.0	509.12501972922695	1808.2380952380952	504.5691141258105	012345	0.1086746826017952	DioneAgraulisEueidesHeliconius	5.06407336703	0.0410338890962	0.249873238507	0.749619715521
OG_10578.Eueides	OG_10578	Nymphalidae	FBgn0030336	32135	CG1578	63	1956.0	509.12501972922695	1808.2380952380952	504.5691141258105	012345	0.1086746826017952	Eueides	0.0665686644456	1	1	1
OG_10579.Heliconius	OG_10579	Nymphalidae	-	47757	-	48	783.0625	227.82681710841243	675.8125	14.984236508744782	012345	0.07080125903327139	Heliconius	0.0374586099132	1	1	1
OG_10579.EueidesHeliconius	OG_10579	Nymphalidae	-	47757	-	48	783.0625	227.82681710841243	675.8125	14.984236508744782	012345	0.07080125903327139	EueidesHeliconius	0	1	1	1
OG_10579.Heliconiini	OG_10579	Nymphalidae	-	47757	-	48	783.0625	227.82681710841243	675.8125	14.984236508744782	012345	0.07080125903327139	Heliconiini	100000	0.0261709565421	0.155546244991	0.777731224956
OG_10579.DioneAgraulisEueidesHeliconius	OG_10579	Nymphalidae	-	47757	-	48	783.0625	227.82681710841243	675.8125	14.984236508744782	012345	0.07080125903327139	DioneAgraulisEueidesHeliconius	0	1	1	1
OG_10579.Eueides	OG_10579	Nymphalidae	-	47757	-	48	783.0625	227.82681710841243	675.8125	14.984236508744782	012345	0.07080125903327139	Eueides	0.0366430252845	1	1	1
OG_10583.Heliconius	OG_10583	Nymphalidae	-	47757	-	58	426.51724137931035	187.25312403630423	378.2586206896552	22.575971621377164	012345	0.1038785355828666	Heliconius	10000000000	1	0.349871068503	1
OG_10583.EueidesHeliconius	OG_10583	Nymphalidae	-	47757	-	58	426.51724137931035	187.25312403630423	378.2586206896552	22.575971621377164	012345	0.1038785355828666	EueidesHeliconius	0	1	1	1
OG_10583.Heliconiini	OG_10583	Nymphalidae	-	47757	-	58	426.51724137931035	187.25312403630423	378.2586206896552	22.575971621377164	012345	0.1038785355828666	Heliconiini	0.128279699786	1	1	1
OG_10583.DioneAgraulisEueidesHeliconius	OG_10583	Nymphalidae	-	47757	-	58	426.51724137931035	187.25312403630423	378.2586206896552	22.575971621377164	012345	0.1038785355828666	DioneAgraulisEueidesHeliconius	0.183591405491	1	1	1
OG_10583.Eueides	OG_10583	Nymphalidae	-	47757	-	58	426.51724137931035	187.25312403630423	378.2586206896552	22.575971621377164	012345	0.1038785355828666	Eueides	0.0499187713674	1	1	1
OG_10585.Heliconius	OG_10585	Nymphalidae	FBgn0010379	41957	Akt	62	2137.451612903226	621.2745400467508	1957.0645161290322	586.0033818841019	012345	0.133773887731203	Heliconius	0.0493758467237	1	1	1
OG_10585.EueidesHeliconius	OG_10585	Nymphalidae	FBgn0010379	41957	Akt	62	2137.451612903226	621.2745400467508	1957.0645161290322	586.0033818841019	012345	0.133773887731203	EueidesHeliconius	58.0618062766	0.00851623642567	0.0146851041317	0.0587404165269
OG_10585.Heliconiini	OG_10585	Nymphalidae	FBgn0010379	41957	Akt	62	2137.451612903226	621.2745400467508	1957.0645161290322	586.0033818841019	012345	0.133773887731203	Heliconiini	0.821516180119	0.160969842891	1	1
OG_10585.Eueides	OG_10585	Nymphalidae	FBgn0010379	41957	Akt	62	2137.451612903226	621.2745400467508	1957.0645161290322	586.0033818841019	012345	0.133773887731203	Eueides	0.198808155963	1	1	1
OG_10586.Heliconius	OG_10586	Nymphalidae	sp|Q9X248|FABG_THEMA	-	-	57	768.8421052631579	115.23260830433588	734.1052631578947	132.76805843545435	012345	0.160111267641602	Heliconius	0.514429284857	1	1	1
OG_10586.EueidesHeliconius	OG_10586	Nymphalidae	sp|Q9X248|FABG_THEMA	-	-	57	768.8421052631579	115.23260830433588	734.1052631578947	132.76805843545435	012345	0.160111267641602	EueidesHeliconius	0.0458194064226	1	1	1
OG_10586.Heliconiini	OG_10586	Nymphalidae	sp|Q9X248|FABG_THEMA	-	-	57	768.8421052631579	115.23260830433588	734.1052631578947	132.76805843545435	012345	0.160111267641602	Heliconiini	0.128757557151	1	1	1
OG_10586.DioneAgraulisEueidesHeliconius	OG_10586	Nymphalidae	sp|Q9X248|FABG_THEMA	-	-	57	768.8421052631579	115.23260830433588	734.1052631578947	132.76805843545435	012345	0.160111267641602	DioneAgraulisEueidesHeliconius	0.16677516968	1	1	1
OG_10586.Eueides	OG_10586	Nymphalidae	sp|Q9X248|FABG_THEMA	-	-	57	768.8421052631579	115.23260830433588	734.1052631578947	132.76805843545435	012345	0.160111267641602	Eueides	5.12198524411	0.0664368689539	0.118253276243	0.591266381213
OG_10587.Heliconius	OG_10587	Nymphalidae	sp|Q6AY04|MAIP1_RAT	-	-	63	669.0	117.0677459544564	655.2857142857143	117.20642874337358	012345	0.08662481534716238	Heliconius	0	1	1	1
OG_10587.EueidesHeliconius	OG_10587	Nymphalidae	sp|Q6AY04|MAIP1_RAT	-	-	63	669.0	117.0677459544564	655.2857142857143	117.20642874337358	012345	0.08662481534716238	EueidesHeliconius	0.210817062145	1	1	1
OG_10587.Heliconiini	OG_10587	Nymphalidae	sp|Q6AY04|MAIP1_RAT	-	-	63	669.0	117.0677459544564	655.2857142857143	117.20642874337358	012345	0.08662481534716238	Heliconiini	0.0322111612235	1	1	1
OG_10587.Eueides	OG_10587	Nymphalidae	sp|Q6AY04|MAIP1_RAT	-	-	63	669.0	117.0677459544564	655.2857142857143	117.20642874337358	012345	0.08662481534716238	Eueides	0.0717747248682	1	1	1
OG_10588.Heliconius	OG_10588	Heliconiini	sp|A7GRP4|RSMH_BACCN	-	-	54	530.7222222222222	87.4304838495867	426.8888888888889	16.366934447534042	012345	0.2837620480814175	Heliconius	0.140051059882	1	1	1
OG_10588.EueidesHeliconius	OG_10588	Heliconiini	sp|A7GRP4|RSMH_BACCN	-	-	54	530.7222222222222	87.4304838495867	426.8888888888889	16.366934447534042	012345	0.2837620480814175	EueidesHeliconius	5.69665540634	0.0596719174905	0.368419198843	1
OG_10588.DioneAgraulisEueidesHeliconius	OG_10588	Heliconiini	sp|A7GRP4|RSMH_BACCN	-	-	54	530.7222222222222	87.4304838495867	426.8888888888889	16.366934447534042	012345	0.2837620480814175	DioneAgraulisEueidesHeliconius	38.506855701	0.019170816514	0.134473523247	0.537894092988
OG_10588.Eueides	OG_10588	Heliconiini	sp|A7GRP4|RSMH_BACCN	-	-	54	530.7222222222222	87.4304838495867	426.8888888888889	16.366934447534042	012345	0.2837620480814175	Eueides	0.072328588744	1	1	1
OG_10591.Heliconius	OG_10591	Nymphalidae	sp|Q1JP73|QSPP_BOVIN	-	-	62	954.5806451612904	149.2508765184287	931.741935483871	160.28079548937083	012345	0.1254822302531174	Heliconius	0.294865457199	1	1	1
OG_10591.EueidesHeliconius	OG_10591	Nymphalidae	sp|Q1JP73|QSPP_BOVIN	-	-	62	954.5806451612904	149.2508765184287	931.741935483871	160.28079548937083	012345	0.1254822302531174	EueidesHeliconius	0.068876752229	1	1	1
OG_10591.Heliconiini	OG_10591	Nymphalidae	sp|Q1JP73|QSPP_BOVIN	-	-	62	954.5806451612904	149.2508765184287	931.741935483871	160.28079548937083	012345	0.1254822302531174	Heliconiini	0.0366508032299	1	1	1
OG_10591.DioneAgraulisEueidesHeliconius	OG_10591	Nymphalidae	sp|Q1JP73|QSPP_BOVIN	-	-	62	954.5806451612904	149.2508765184287	931.741935483871	160.28079548937083	012345	0.1254822302531174	DioneAgraulisEueidesHeliconius	0.0859945634717	1	1	1
OG_10591.Eueides	OG_10591	Nymphalidae	sp|Q1JP73|QSPP_BOVIN	-	-	62	954.5806451612904	149.2508765184287	931.741935483871	160.28079548937083	012345	0.1254822302531174	Eueides	0.0516540211569	1	1	1
OG_10597.Heliconius	OG_10597	Nymphalidae	-	47757	-	45	518.3333333333334	113.52337008543905	481.73333333333335	48.995872842062475	012310	0.170426888841261	Heliconius	0.192087179715	1	1	1
OG_10597.EueidesHeliconius	OG_10597	Nymphalidae	-	47757	-	45	518.3333333333334	113.52337008543905	481.73333333333335	48.995872842062475	012310	0.170426888841261	EueidesHeliconius	0.12347519958	1	1	1
OG_10597.DioneAgraulisEueidesHeliconius	OG_10597	Nymphalidae	-	47757	-	45	518.3333333333334	113.52337008543905	481.73333333333335	48.995872842062475	012310	0.170426888841261	DioneAgraulisEueidesHeliconius	539.042015202	0.00892741848683	0.00607517661897	0.0303758830949
OG_10597.Heliconiini	OG_10597	Nymphalidae	-	47757	-	45	518.3333333333334	113.52337008543905	481.73333333333335	48.995872842062475	012310	0.170426888841261	Heliconiini	0.0643079868215	1	1	1
OG_10597.Eueides	OG_10597	Nymphalidae	-	47757	-	45	518.3333333333334	113.52337008543905	481.73333333333335	48.995872842062475	012310	0.170426888841261	Eueides	0.128170330703	1	1	1
OG_10600.Heliconius	OG_10600	Nymphalidae	sp|P0ACP4|CRA_SHIFL	-	-	58	524.7413793103449	81.26448101083014	435.3103448275862	57.09707610623414	012345	0.1746964367462351	Heliconius	0.313854822321	1	1	1
OG_10600.Heliconiini	OG_10600	Nymphalidae	sp|P0ACP4|CRA_SHIFL	-	-	58	524.7413793103449	81.26448101083014	435.3103448275862	57.09707610623414	012345	0.1746964367462351	Heliconiini	0.0982613019787	1	1	1
OG_10600.Eueides	OG_10600	Nymphalidae	sp|P0ACP4|CRA_SHIFL	-	-	58	524.7413793103449	81.26448101083014	435.3103448275862	57.09707610623414	012345	0.1746964367462351	Eueides	0.0247228864233	1	1	1
OG_10605.Heliconius	OG_10605	Nymphalidae	FBgn0024184	32757	unc-4	60	980.9	206.68161505078288	920.9	191.47973783144784	012345	0.03190631066891538	Heliconius	0	1	1	1
OG_10605.EueidesHeliconius	OG_10605	Nymphalidae	FBgn0024184	32757	unc-4	60	980.9	206.68161505078288	920.9	191.47973783144784	012345	0.03190631066891538	EueidesHeliconius	0.0376288591957	1	1	1
OG_10605.Heliconiini	OG_10605	Nymphalidae	FBgn0024184	32757	unc-4	60	980.9	206.68161505078288	920.9	191.47973783144784	012345	0.03190631066891538	Heliconiini	0.0126358375097	1	1	1
OG_10605.DioneAgraulisEueidesHeliconius	OG_10605	Nymphalidae	FBgn0024184	32757	unc-4	60	980.9	206.68161505078288	920.9	191.47973783144784	012345	0.03190631066891538	DioneAgraulisEueidesHeliconius	0	1	1	1
OG_10605.Eueides	OG_10605	Nymphalidae	FBgn0024184	32757	unc-4	60	980.9	206.68161505078288	920.9	191.47973783144784	012345	0.03190631066891538	Eueides	0.0256557076016	1	1	1
OG_10618.EueidesHeliconius	OG_10618	DioneAgraulisEueidesHeliconius	-	47757	-	30	499.4	72.01555387553442	452.6	58.64332869133539	012310	1.051209243167847	EueidesHeliconius	1.15576046495	1	0.469752404255	0.469752404255
OG_10625.Heliconius	OG_10625	Nymphalidae	sp|P04069|CBPB_ASTAS	-	-	61	1060.672131147541	216.80963330115088	1003.6229508196722	203.24249942278445	012345	0.1158090061714449	Heliconius	0.053234725659	1	1	1
OG_10625.EueidesHeliconius	OG_10625	Nymphalidae	sp|P04069|CBPB_ASTAS	-	-	61	1060.672131147541	216.80963330115088	1003.6229508196722	203.24249942278445	012345	0.1158090061714449	EueidesHeliconius	0.108535786431	1	1	1
OG_10625.Heliconiini	OG_10625	Nymphalidae	sp|P04069|CBPB_ASTAS	-	-	61	1060.672131147541	216.80963330115088	1003.6229508196722	203.24249942278445	012345	0.1158090061714449	Heliconiini	8.56119520348	0.0316830486122	0.103333197644	0.516665988219
OG_10625.DioneAgraulisEueidesHeliconius	OG_10625	Nymphalidae	sp|P04069|CBPB_ASTAS	-	-	61	1060.672131147541	216.80963330115088	1003.6229508196722	203.24249942278445	012345	0.1158090061714449	DioneAgraulisEueidesHeliconius	0.165765888402	1	1	1
OG_10625.Eueides	OG_10625	Nymphalidae	sp|P04069|CBPB_ASTAS	-	-	61	1060.672131147541	216.80963330115088	1003.6229508196722	203.24249942278445	012345	0.1158090061714449	Eueides	0.167172060333	1	1	1
OG_10629.EueidesHeliconius	OG_10629	Nymphalidae	-	47757	-	52	585.6923076923077	372.06262595581416	449.9423076923077	100.21715143042334	010010	0.03701335649077062	EueidesHeliconius	0	1	1	1
OG_10629.Heliconiini	OG_10629	Nymphalidae	-	47757	-	52	585.6923076923077	372.06262595581416	449.9423076923077	100.21715143042334	010010	0.03701335649077062	Heliconiini	0	1	1	1
OG_10629.Eueides	OG_10629	Nymphalidae	-	47757	-	52	585.6923076923077	372.06262595581416	449.9423076923077	100.21715143042334	010010	0.03701335649077062	Eueides	0	1	1	1
OG_10631.Heliconius	OG_10631	Nymphalidae	sp|Q94546|ATU_DROME	-	-	62	1843.1612903225807	481.9356198989315	1759.5483870967741	507.6119827959578	012345	0.05116970134306688	Heliconius	39.1317965405	0.00467380314536	0.00724308666301	0.028972346652
OG_10631.EueidesHeliconius	OG_10631	Nymphalidae	sp|Q94546|ATU_DROME	-	-	62	1843.1612903225807	481.9356198989315	1759.5483870967741	507.6119827959578	012345	0.05116970134306688	EueidesHeliconius	0.0256656229872	1	1	1
OG_10631.Heliconiini	OG_10631	Nymphalidae	sp|Q94546|ATU_DROME	-	-	62	1843.1612903225807	481.9356198989315	1759.5483870967741	507.6119827959578	012345	0.05116970134306688	Heliconiini	0.0555473765558	1	1	1
OG_10631.Eueides	OG_10631	Nymphalidae	sp|Q94546|ATU_DROME	-	-	62	1843.1612903225807	481.9356198989315	1759.5483870967741	507.6119827959578	012345	0.05116970134306688	Eueides	0.0312832712257	1	1	1
OG_10633.Heliconius	OG_10633	Nymphalidae	sp|P49963|SRP19_DROME	-	-	60	431.2	48.01520592479012	419.45	47.91082862986195	012230	0.06081600609897958	Heliconius	0	1	1	1
OG_10633.Heliconiini	OG_10633	Nymphalidae	sp|P49963|SRP19_DROME	-	-	60	431.2	48.01520592479012	419.45	47.91082862986195	012230	0.06081600609897958	Heliconiini	0.0266930974217	1	1	1
OG_10633.DioneAgraulisEueidesHeliconius	OG_10633	Nymphalidae	sp|P49963|SRP19_DROME	-	-	60	431.2	48.01520592479012	419.45	47.91082862986195	012230	0.06081600609897958	DioneAgraulisEueidesHeliconius	0	1	1	1
OG_10633.Eueides	OG_10633	Nymphalidae	sp|P49963|SRP19_DROME	-	-	60	431.2	48.01520592479012	419.45	47.91082862986195	012230	0.06081600609897958	Eueides	0.0321001488497	1	1	1
OG_10636.Heliconius	OG_10636	Nymphalidae	sp|Q09002|STM2B_XENLA	-	-	60	497.55	98.113951607302	451.05	40.57890461804015	010020	0.1518209225437684	Heliconius	14.9598949984	0.0210215949534	0.176956478908	0.70782591563
OG_10636.EueidesHeliconius	OG_10636	Nymphalidae	sp|Q09002|STM2B_XENLA	-	-	60	497.55	98.113951607302	451.05	40.57890461804015	010020	0.1518209225437684	EueidesHeliconius	0.225066331717	1	1	1
OG_10636.Heliconiini	OG_10636	Nymphalidae	sp|Q09002|STM2B_XENLA	-	-	60	497.55	98.113951607302	451.05	40.57890461804015	010020	0.1518209225437684	Heliconiini	1.22594045324	0.0867645134922	0.450364519265	1
OG_10636.Eueides	OG_10636	Nymphalidae	sp|Q09002|STM2B_XENLA	-	-	60	497.55	98.113951607302	451.05	40.57890461804015	010020	0.1518209225437684	Eueides	0.214820507274	1	1	1
OG_10640.Heliconius	OG_10640	Nymphalidae	FBgn0038332	41877	CG6136	62	989.3709677419355	189.54616714591893	942.9677419354839	160.90018622474992	012345	0.1051145323396135	Heliconius	0.100165381378	1	1	1
OG_10640.EueidesHeliconius	OG_10640	Nymphalidae	FBgn0038332	41877	CG6136	62	989.3709677419355	189.54616714591893	942.9677419354839	160.90018622474992	012345	0.1051145323396135	EueidesHeliconius	0.127749126987	1	1	1
OG_10640.Heliconiini	OG_10640	Nymphalidae	FBgn0038332	41877	CG6136	62	989.3709677419355	189.54616714591893	942.9677419354839	160.90018622474992	012345	0.1051145323396135	Heliconiini	0.621950761097	0.288982570375	1	1
OG_10640.DioneAgraulisEueidesHeliconius	OG_10640	Nymphalidae	FBgn0038332	41877	CG6136	62	989.3709677419355	189.54616714591893	942.9677419354839	160.90018622474992	012345	0.1051145323396135	DioneAgraulisEueidesHeliconius	0.329578485144	1	1	1
OG_10640.Eueides	OG_10640	Nymphalidae	FBgn0038332	41877	CG6136	62	989.3709677419355	189.54616714591893	942.9677419354839	160.90018622474992	012345	0.1051145323396135	Eueides	0.0778988130741	1	1	1
OG_10645.Heliconius	OG_10645	Nymphalidae	sp|Q91175|ADA1A_ORYLA	-	-	57	955.0526315789474	202.87810021218743	907.8421052631579	185.20351910885688	010020	0.02129245009646258	Heliconius	0.0299016963397	1	1	1
OG_10645.EueidesHeliconius	OG_10645	Nymphalidae	sp|Q91175|ADA1A_ORYLA	-	-	57	955.0526315789474	202.87810021218743	907.8421052631579	185.20351910885688	010020	0.02129245009646258	EueidesHeliconius	0	1	1	1
OG_10645.Heliconiini	OG_10645	Nymphalidae	sp|Q91175|ADA1A_ORYLA	-	-	57	955.0526315789474	202.87810021218743	907.8421052631579	185.20351910885688	010020	0.02129245009646258	Heliconiini	0.00820718099582	1	1	1
OG_10645.Eueides	OG_10645	Nymphalidae	sp|Q91175|ADA1A_ORYLA	-	-	57	955.0526315789474	202.87810021218743	907.8421052631579	185.20351910885688	010020	0.02129245009646258	Eueides	0.0140593345228	1	1	1
OG_10649.Heliconius	OG_10649	Nymphalidae	FBgn0032101	34241	CG9586	59	629.4915254237288	129.02914831394583	589.4745762711865	40.852506896587236	012345	0.07654942819359367	Heliconius	0.121078127728	1	1	1
OG_10649.EueidesHeliconius	OG_10649	Nymphalidae	FBgn0032101	34241	CG9586	59	629.4915254237288	129.02914831394583	589.4745762711865	40.852506896587236	012345	0.07654942819359367	EueidesHeliconius	0.0718126143208	1	1	1
OG_10649.Heliconiini	OG_10649	Nymphalidae	FBgn0032101	34241	CG9586	59	629.4915254237288	129.02914831394583	589.4745762711865	40.852506896587236	012345	0.07654942819359367	Heliconiini	0.0758156223112	1	1	1
OG_10649.Eueides	OG_10649	Nymphalidae	FBgn0032101	34241	CG9586	59	629.4915254237288	129.02914831394583	589.4745762711865	40.852506896587236	012345	0.07654942819359367	Eueides	0.291236114424	1	1	1
OG_1065.Heliconius	OG_1065	Nymphalidae	FBgn0032517	34753	CG7099	63	4359.666666666667	598.4905881690906	4176.047619047619	573.8741753738339	012345	0.1101041252677025	Heliconius	0.857237024832	0.178403513844	1	1
OG_1065.EueidesHeliconius	OG_1065	Nymphalidae	FBgn0032517	34753	CG7099	63	4359.666666666667	598.4905881690906	4176.047619047619	573.8741753738339	012345	0.1101041252677025	EueidesHeliconius	1.05191501962	0.13411649523	0.5	1
OG_1065.Heliconiini	OG_1065	Nymphalidae	FBgn0032517	34753	CG7099	63	4359.666666666667	598.4905881690906	4176.047619047619	573.8741753738339	012345	0.1101041252677025	Heliconiini	122.222585632	0.00268183285932	0.5	1
OG_1065.DioneAgraulisEueidesHeliconius	OG_1065	Nymphalidae	FBgn0032517	34753	CG7099	63	4359.666666666667	598.4905881690906	4176.047619047619	573.8741753738339	012345	0.1101041252677025	DioneAgraulisEueidesHeliconius	4.56694519003	0.0181281818637	0.0995433925529	0.497716962765
OG_1065.Eueides	OG_1065	Nymphalidae	FBgn0032517	34753	CG7099	63	4359.666666666667	598.4905881690906	4176.047619047619	573.8741753738339	012345	0.1101041252677025	Eueides	4.39510011659	0.016338190459	0.36921216297	1
OG_10653.Heliconius	OG_10653	Nymphalidae	sp|Q8NA19|LMBL4_HUMAN	-	-	62	1073.1290322580646	231.36882187920904	922.5	223.31481828243312	012310	0.1362699910194534	Heliconius	0.0337447500829	1	1	1
OG_10653.EueidesHeliconius	OG_10653	Nymphalidae	sp|Q8NA19|LMBL4_HUMAN	-	-	62	1073.1290322580646	231.36882187920904	922.5	223.31481828243312	012310	0.1362699910194534	EueidesHeliconius	78.3422856994	0.00933951557622	0.000477869775175	0.00238934887588
OG_10653.Heliconiini	OG_10653	Nymphalidae	sp|Q8NA19|LMBL4_HUMAN	-	-	62	1073.1290322580646	231.36882187920904	922.5	223.31481828243312	012310	0.1362699910194534	Heliconiini	792.850259328	0.0573123052859	0.5	1
OG_10653.DioneAgraulisEueidesHeliconius	OG_10653	Nymphalidae	sp|Q8NA19|LMBL4_HUMAN	-	-	62	1073.1290322580646	231.36882187920904	922.5	223.31481828243312	012310	0.1362699910194534	DioneAgraulisEueidesHeliconius	0.0698803769138	1	1	1
OG_10653.Eueides	OG_10653	Nymphalidae	sp|Q8NA19|LMBL4_HUMAN	-	-	62	1073.1290322580646	231.36882187920904	922.5	223.31481828243312	012310	0.1362699910194534	Eueides	0	1	1	1
OG_1066.Heliconius	OG_1066	Nymphalidae	FBgn0022029	36953	l(2)k01209	57	654.0	59.11451865480657	644.6842105263158	69.16954960672929	010020	0.01024313789436186	Heliconius	0	1	1	1
OG_1066.EueidesHeliconius	OG_1066	Nymphalidae	FBgn0022029	36953	l(2)k01209	57	654.0	59.11451865480657	644.6842105263158	69.16954960672929	010020	0.01024313789436186	EueidesHeliconius	0	1	1	1
OG_1066.Heliconiini	OG_1066	Nymphalidae	FBgn0022029	36953	l(2)k01209	57	654.0	59.11451865480657	644.6842105263158	69.16954960672929	010020	0.01024313789436186	Heliconiini	0.0114416225221	1	1	1
OG_1066.DioneAgraulisEueidesHeliconius	OG_1066	Nymphalidae	FBgn0022029	36953	l(2)k01209	57	654.0	59.11451865480657	644.6842105263158	69.16954960672929	010020	0.01024313789436186	DioneAgraulisEueidesHeliconius	0	1	1	1
OG_1066.Eueides	OG_1066	Nymphalidae	FBgn0022029	36953	l(2)k01209	57	654.0	59.11451865480657	644.6842105263158	69.16954960672929	010020	0.01024313789436186	Eueides	0	1	1	1
OG_10663.Heliconius	OG_10663	EueidesHeliconius	sp|Q16EE5|U729_AEDAE	-	-	24	285.75	65.53958727364706	257.125	4.19635258289863	012230	0.1983170086332369	Heliconius	0	1	1	1
OG_10665.Heliconius	OG_10665	Nymphalidae	sp|O01159|RSP7_CAEEL	-	-	61	1684.032786885246	336.58039096292856	1628.6065573770493	336.2596225054275	010020	0.04610461973789308	Heliconius	0.0536254551174	1	1	1
OG_10665.EueidesHeliconius	OG_10665	Nymphalidae	sp|O01159|RSP7_CAEEL	-	-	61	1684.032786885246	336.58039096292856	1628.6065573770493	336.2596225054275	010020	0.04610461973789308	EueidesHeliconius	0.00965088161918	1	1	1
OG_10665.Heliconiini	OG_10665	Nymphalidae	sp|O01159|RSP7_CAEEL	-	-	61	1684.032786885246	336.58039096292856	1628.6065573770493	336.2596225054275	010020	0.04610461973789308	Heliconiini	0.860700398377	0.0495556197709	1	1
OG_10665.Eueides	OG_10665	Nymphalidae	sp|O01159|RSP7_CAEEL	-	-	61	1684.032786885246	336.58039096292856	1628.6065573770493	336.2596225054275	010020	0.04610461973789308	Eueides	0.05631329329	1	1	1
OG_1067.Heliconius	OG_1067	Nymphalidae	FBgn0031895	34001	CG4497	61	717.639344262295	224.27530160730007	661.7704918032787	111.85256593532178	012230	0.04996047170567676	Heliconius	0.0355106855308	1	1	1
OG_1067.EueidesHeliconius	OG_1067	Nymphalidae	FBgn0031895	34001	CG4497	61	717.639344262295	224.27530160730007	661.7704918032787	111.85256593532178	012230	0.04996047170567676	EueidesHeliconius	0	1	1	1
OG_1067.DioneAgraulisEueidesHeliconius	OG_1067	Nymphalidae	FBgn0031895	34001	CG4497	61	717.639344262295	224.27530160730007	661.7704918032787	111.85256593532178	012230	0.04996047170567676	DioneAgraulisEueidesHeliconius	28.2841354187	0.0148727900265	0.137032079438	0.54812831775
OG_1067.Eueides	OG_1067	Nymphalidae	FBgn0031895	34001	CG4497	61	717.639344262295	224.27530160730007	661.7704918032787	111.85256593532178	012230	0.04996047170567676	Eueides	0	1	1	1
OG_10672.Heliconius	OG_10672	Nymphalidae	FBgn0030241	32015	feo	63	1393.3809523809523	402.2187838892891	1341.095238095238	402.45353529638965	012345	0.1132237101328456	Heliconius	0.0454047384221	1	1	1
OG_10672.EueidesHeliconius	OG_10672	Nymphalidae	FBgn0030241	32015	feo	63	1393.3809523809523	402.2187838892891	1341.095238095238	402.45353529638965	012345	0.1132237101328456	EueidesHeliconius	3.97932274276	0.018642848646	0.222241799948	0.888967199791
OG_10672.Heliconiini	OG_10672	Nymphalidae	FBgn0030241	32015	feo	63	1393.3809523809523	402.2187838892891	1341.095238095238	402.45353529638965	012345	0.1132237101328456	Heliconiini	0.982588898045	0.107327482321	1	1
OG_10672.DioneAgraulisEueidesHeliconius	OG_10672	Nymphalidae	FBgn0030241	32015	feo	63	1393.3809523809523	402.2187838892891	1341.095238095238	402.45353529638965	012345	0.1132237101328456	DioneAgraulisEueidesHeliconius	1557.39313419	0.01201069402	0.0309304200006	0.154652100003
OG_10672.Eueides	OG_10672	Nymphalidae	FBgn0030241	32015	feo	63	1393.3809523809523	402.2187838892891	1341.095238095238	402.45353529638965	012345	0.1132237101328456	Eueides	0.0963426728921	1	1	1
OG_10673.Heliconius	OG_10673	Nymphalidae	sp|A8AQP0|KEFB_CITK8	-	-	63	2044.6666666666667	441.249128781909	1864.4761904761904	380.25738389219373	012345	0.060195626153456	Heliconius	0.0779092929023	1	1	1
OG_10673.EueidesHeliconius	OG_10673	Nymphalidae	sp|A8AQP0|KEFB_CITK8	-	-	63	2044.6666666666667	441.249128781909	1864.4761904761904	380.25738389219373	012345	0.060195626153456	EueidesHeliconius	0.0168132914902	1	1	1
OG_10673.Heliconiini	OG_10673	Nymphalidae	sp|A8AQP0|KEFB_CITK8	-	-	63	2044.6666666666667	441.249128781909	1864.4761904761904	380.25738389219373	012345	0.060195626153456	Heliconiini	0.983925596002	0.0776741116367	1	1
OG_10673.DioneAgraulisEueidesHeliconius	OG_10673	Nymphalidae	sp|A8AQP0|KEFB_CITK8	-	-	63	2044.6666666666667	441.249128781909	1864.4761904761904	380.25738389219373	012345	0.060195626153456	DioneAgraulisEueidesHeliconius	0.123325128721	1	1	1
OG_10673.Eueides	OG_10673	Nymphalidae	sp|A8AQP0|KEFB_CITK8	-	-	63	2044.6666666666667	441.249128781909	1864.4761904761904	380.25738389219373	012345	0.060195626153456	Eueides	0.0123285867093	1	1	1
OG_10674.Heliconius	OG_10674	Nymphalidae	sp|P33681|CD80_HUMAN	-	-	61	997.672131147541	251.69098418181176	919.1311475409836	210.646893990544	012310	0.09628428669027475	Heliconius	0.0905599517269	1	1	1
OG_10674.EueidesHeliconius	OG_10674	Nymphalidae	sp|P33681|CD80_HUMAN	-	-	61	997.672131147541	251.69098418181176	919.1311475409836	210.646893990544	012310	0.09628428669027475	EueidesHeliconius	0.0650861225468	1	1	1
OG_10674.Heliconiini	OG_10674	Nymphalidae	sp|P33681|CD80_HUMAN	-	-	61	997.672131147541	251.69098418181176	919.1311475409836	210.646893990544	012310	0.09628428669027475	Heliconiini	0.0537946402666	1	1	1
OG_10674.DioneAgraulisEueidesHeliconius	OG_10674	Nymphalidae	sp|P33681|CD80_HUMAN	-	-	61	997.672131147541	251.69098418181176	919.1311475409836	210.646893990544	012310	0.09628428669027475	DioneAgraulisEueidesHeliconius	10000000000	1	0.441516177684	1
OG_10674.Eueides	OG_10674	Nymphalidae	sp|P33681|CD80_HUMAN	-	-	61	997.672131147541	251.69098418181176	919.1311475409836	210.646893990544	012310	0.09628428669027475	Eueides	0.216040422737	1	1	1
OG_10679.Heliconius	OG_10679	Heliconiini	-	47757	-	30	526.8	60.202657748640966	479.5	63.992577694604556	012310	0.4814976582813485	Heliconius	0.449316308987	1	1	1
OG_10679.Eueides	OG_10679	Heliconiini	-	47757	-	30	526.8	60.202657748640966	479.5	63.992577694604556	012310	0.4814976582813485	Eueides	1.22700492841	1	0.468978631377	0.937957262755
OG_10682.Heliconius	OG_10682	Nymphalidae	sp|P56656|CP239_MOUSE	-	-	58	1266.3620689655172	264.40001684202707	1224.2068965517242	263.2270397113416	012345	0.2041858770764858	Heliconius	3.68527164974	0.0989279633814	0.0933970175257	0.280191052577
OG_10682.EueidesHeliconius	OG_10682	Nymphalidae	sp|P56656|CP239_MOUSE	-	-	58	1266.3620689655172	264.40001684202707	1224.2068965517242	263.2270397113416	012345	0.2041858770764858	EueidesHeliconius	6.87444550093	0.0290295227504	0.0612228555887	0.244891422355
OG_10682.DioneAgraulisEueidesHeliconius	OG_10682	Nymphalidae	sp|P56656|CP239_MOUSE	-	-	58	1266.3620689655172	264.40001684202707	1224.2068965517242	263.2270397113416	012345	0.2041858770764858	DioneAgraulisEueidesHeliconius	0.11956006511	1	1	1
OG_10682.Eueides	OG_10682	Nymphalidae	sp|P56656|CP239_MOUSE	-	-	58	1266.3620689655172	264.40001684202707	1224.2068965517242	263.2270397113416	012345	0.2041858770764858	Eueides	0.280211482556	1	1	1
OG_10687.Heliconius	OG_10687	DioneAgraulisEueidesHeliconius	-	47757	-	33	513.1818181818181	77.83177451379959	388.3636363636364	46.44111173846006	010010	0.2355413416952397	Heliconius	16.4769483003	0.0709429756697	0.0746073072407	0.149214614481
OG_10687.Eueides	OG_10687	DioneAgraulisEueidesHeliconius	-	47757	-	33	513.1818181818181	77.83177451379959	388.3636363636364	46.44111173846006	010010	0.2355413416952397	Eueides	0.0469019740256	1	1	1
OG_10688.Heliconius	OG_10688	Nymphalidae	sp|P28488|THSB_SULSH	-	-	57	696.2105263157895	139.61623301312645	612.3157894736842	105.96129016697756	012310	0.1470674180538269	Heliconius	0.174365901052	1	1	1
OG_10688.EueidesHeliconius	OG_10688	Nymphalidae	sp|P28488|THSB_SULSH	-	-	57	696.2105263157895	139.61623301312645	612.3157894736842	105.96129016697756	012310	0.1470674180538269	EueidesHeliconius	27.5215888217	0.0120039493483	0.117901078964	0.471604315854
OG_10688.Heliconiini	OG_10688	Nymphalidae	sp|P28488|THSB_SULSH	-	-	57	696.2105263157895	139.61623301312645	612.3157894736842	105.96129016697756	012310	0.1470674180538269	Heliconiini	5.62647150238	0.0486669078753	0.0625404140086	0.312702070043
OG_10688.DioneAgraulisEueidesHeliconius	OG_10688	Nymphalidae	sp|P28488|THSB_SULSH	-	-	57	696.2105263157895	139.61623301312645	612.3157894736842	105.96129016697756	012310	0.1470674180538269	DioneAgraulisEueidesHeliconius	0.407064822733	1	1	1
OG_10688.Eueides	OG_10688	Nymphalidae	sp|P28488|THSB_SULSH	-	-	57	696.2105263157895	139.61623301312645	612.3157894736842	105.96129016697756	012310	0.1470674180538269	Eueides	0.214632622179	1	1	1
OG_10689.Heliconius	OG_10689	Heliconiini	sp|P37199|NU155_RAT	-	-	39	1046.1538461538462	259.7258454465004	895.7692307692307	151.98337654349612	012310	0.5498389792395624	Heliconius	33.7291269592	0.0221453237059	0.0649605833732	0.259842333493
OG_10689.EueidesHeliconius	OG_10689	Heliconiini	sp|P37199|NU155_RAT	-	-	39	1046.1538461538462	259.7258454465004	895.7692307692307	151.98337654349612	012310	0.5498389792395624	EueidesHeliconius	50.7048249692	0.0389996913979	0.0712091799199	0.21362753976
OG_10689.DioneAgraulisEueidesHeliconius	OG_10689	Heliconiini	sp|P37199|NU155_RAT	-	-	39	1046.1538461538462	259.7258454465004	895.7692307692307	151.98337654349612	012310	0.5498389792395624	DioneAgraulisEueidesHeliconius	0.215943823063	1	1	1
OG_10689.Eueides	OG_10689	Heliconiini	sp|P37199|NU155_RAT	-	-	39	1046.1538461538462	259.7258454465004	895.7692307692307	151.98337654349612	012310	0.5498389792395624	Eueides	0.551283799397	1	1	1
OG_10693.Heliconius	OG_10693	Nymphalidae	sp|P55199|ELL_HUMAN	-	-	62	1701.3387096774193	407.46956916054904	1540.1129032258063	439.248739320669	012345	0.107719169802363	Heliconius	0.16424918726	1	1	1
OG_10693.EueidesHeliconius	OG_10693	Nymphalidae	sp|P55199|ELL_HUMAN	-	-	62	1701.3387096774193	407.46956916054904	1540.1129032258063	439.248739320669	012345	0.107719169802363	EueidesHeliconius	3.19576521359	0.033108633263	0.261157992499	0.783473977496
OG_10693.Heliconiini	OG_10693	Nymphalidae	sp|P55199|ELL_HUMAN	-	-	62	1701.3387096774193	407.46956916054904	1540.1129032258063	439.248739320669	012345	0.107719169802363	Heliconiini	1556.36358802	0.0235642090342	0.00519043738053	0.0207617495221
OG_10693.DioneAgraulisEueidesHeliconius	OG_10693	Nymphalidae	sp|P55199|ELL_HUMAN	-	-	62	1701.3387096774193	407.46956916054904	1540.1129032258063	439.248739320669	012345	0.107719169802363	DioneAgraulisEueidesHeliconius	0.00951190290817	1	1	1
OG_10693.Eueides	OG_10693	Nymphalidae	sp|P55199|ELL_HUMAN	-	-	62	1701.3387096774193	407.46956916054904	1540.1129032258063	439.248739320669	012345	0.107719169802363	Eueides	194.282834295	0.00266880570085	0.00217849300041	0.010892465002
OG_10697.Heliconius	OG_10697	Nymphalidae	sp|A1L209|AT7L3_DANRE	-	-	59	879.8135593220339	144.8237355975048	839.9491525423729	130.09506611741807	012345	0.03961598267332687	Heliconius	0	1	1	1
OG_10697.EueidesHeliconius	OG_10697	Nymphalidae	sp|A1L209|AT7L3_DANRE	-	-	59	879.8135593220339	144.8237355975048	839.9491525423729	130.09506611741807	012345	0.03961598267332687	EueidesHeliconius	0.0373937754783	1	1	1
OG_10697.Heliconiini	OG_10697	Nymphalidae	sp|A1L209|AT7L3_DANRE	-	-	59	879.8135593220339	144.8237355975048	839.9491525423729	130.09506611741807	012345	0.03961598267332687	Heliconiini	8.13952028189	0.00589294155541	0.118658264637	0.593291323186
OG_10697.DioneAgraulisEueidesHeliconius	OG_10697	Nymphalidae	sp|A1L209|AT7L3_DANRE	-	-	59	879.8135593220339	144.8237355975048	839.9491525423729	130.09506611741807	012345	0.03961598267332687	DioneAgraulisEueidesHeliconius	0.0281702343691	1	1	1
OG_10697.Eueides	OG_10697	Nymphalidae	sp|A1L209|AT7L3_DANRE	-	-	59	879.8135593220339	144.8237355975048	839.9491525423729	130.09506611741807	012345	0.03961598267332687	Eueides	0.0326402092395	1	1	1
OG_10702.Heliconius	OG_10702	Nymphalidae	sp|C9ZN16|FAZ1_TRYB9	-	-	63	2559.6190476190477	720.3906001469239	2384.285714285714	681.198883122504	012345	0.2591887091008677	Heliconius	1.718877416	0.101209519855	0.393445601927	1
OG_10702.EueidesHeliconius	OG_10702	Nymphalidae	sp|C9ZN16|FAZ1_TRYB9	-	-	63	2559.6190476190477	720.3906001469239	2384.285714285714	681.198883122504	012345	0.2591887091008677	EueidesHeliconius	0.177698965943	1	1	1
OG_10702.Heliconiini	OG_10702	Nymphalidae	sp|C9ZN16|FAZ1_TRYB9	-	-	63	2559.6190476190477	720.3906001469239	2384.285714285714	681.198883122504	012345	0.2591887091008677	Heliconiini	1.87292738015	0.0889490897344	0.409246850633	1
OG_10702.DioneAgraulisEueidesHeliconius	OG_10702	Nymphalidae	sp|C9ZN16|FAZ1_TRYB9	-	-	63	2559.6190476190477	720.3906001469239	2384.285714285714	681.198883122504	012345	0.2591887091008677	DioneAgraulisEueidesHeliconius	0.282365299635	1	1	1
OG_10702.Eueides	OG_10702	Nymphalidae	sp|C9ZN16|FAZ1_TRYB9	-	-	63	2559.6190476190477	720.3906001469239	2384.285714285714	681.198883122504	012345	0.2591887091008677	Eueides	0.254294359156	1	1	1
OG_10703.Heliconius	OG_10703	Heliconiini	sp|P41809|HKR1_YEAST	-	-	34	1015.3235294117648	85.35418270471759	954.1764705882352	84.40534921305964	012345	0.1706354894345534	Heliconius	0.138390430642	1	1	1
OG_10703.EueidesHeliconius	OG_10703	Heliconiini	sp|P41809|HKR1_YEAST	-	-	34	1015.3235294117648	85.35418270471759	954.1764705882352	84.40534921305964	012345	0.1706354894345534	EueidesHeliconius	0.307929222884	1	1	1
OG_10703.Eueides_Evib	OG_10703	Heliconiini	sp|P41809|HKR1_YEAST	-	-	34	1015.3235294117648	85.35418270471759	954.1764705882352	84.40534921305964	012345	0.1706354894345534	Eueides	0.159480066964	1	1	1
OG_10705.Heliconius	OG_10705	Nymphalidae	sp|Q92564|DCNL4_HUMAN	-	-	62	806.6129032258065	180.07295607871305	673.0645161290323	144.22774004663395	012345	0.1123010084182042	Heliconius	0.0813736275063	1	1	1
OG_10705.EueidesHeliconius	OG_10705	Nymphalidae	sp|Q92564|DCNL4_HUMAN	-	-	62	806.6129032258065	180.07295607871305	673.0645161290323	144.22774004663395	012345	0.1123010084182042	EueidesHeliconius	0.0923592996392	1	1	1
OG_10705.Heliconiini	OG_10705	Nymphalidae	sp|Q92564|DCNL4_HUMAN	-	-	62	806.6129032258065	180.07295607871305	673.0645161290323	144.22774004663395	012345	0.1123010084182042	Heliconiini	0.0986254375022	1	1	1
OG_10705.DioneAgraulisEueidesHeliconius	OG_10705	Nymphalidae	sp|Q92564|DCNL4_HUMAN	-	-	62	806.6129032258065	180.07295607871305	673.0645161290323	144.22774004663395	012345	0.1123010084182042	DioneAgraulisEueidesHeliconius	0	1	1	1
OG_10705.Eueides	OG_10705	Nymphalidae	sp|Q92564|DCNL4_HUMAN	-	-	62	806.6129032258065	180.07295607871305	673.0645161290323	144.22774004663395	012345	0.1123010084182042	Eueides	0	1	1	1
OG_10709.Heliconius	OG_10709	Nymphalidae	FBgn0062413	31601	Ctr1A	63	992.7619047619048	265.2994543030851	879.3809523809524	141.34000754360494	012345	0.1173556348936004	Heliconius	0	1	1	1
OG_10709.EueidesHeliconius	OG_10709	Nymphalidae	FBgn0062413	31601	Ctr1A	63	992.7619047619048	265.2994543030851	879.3809523809524	141.34000754360494	012345	0.1173556348936004	EueidesHeliconius	0.192891107021	1	1	1
OG_10709.Heliconiini	OG_10709	Nymphalidae	FBgn0062413	31601	Ctr1A	63	992.7619047619048	265.2994543030851	879.3809523809524	141.34000754360494	012345	0.1173556348936004	Heliconiini	377.821132883	0.0233232630863	0.127311554028	0.636557770142
OG_10709.DioneAgraulisEueidesHeliconius	OG_10709	Nymphalidae	FBgn0062413	31601	Ctr1A	63	992.7619047619048	265.2994543030851	879.3809523809524	141.34000754360494	012345	0.1173556348936004	DioneAgraulisEueidesHeliconius	0.0334891290215	1	1	1
OG_10709.Eueides	OG_10709	Nymphalidae	FBgn0062413	31601	Ctr1A	63	992.7619047619048	265.2994543030851	879.3809523809524	141.34000754360494	012345	0.1173556348936004	Eueides	0	1	1	1
OG_1071.Heliconius	OG_1071	Nymphalidae	FBgn0031865	33961	Nha1	61	1444.8688524590164	289.945866932333	1381.8688524590164	279.01092730289406	012345	0.1100472167251831	Heliconius	0.0802208773082	1	1	1
OG_1071.EueidesHeliconius	OG_1071	Nymphalidae	FBgn0031865	33961	Nha1	61	1444.8688524590164	289.945866932333	1381.8688524590164	279.01092730289406	012345	0.1100472167251831	EueidesHeliconius	2.32430845223	0.0716033519069	0.22032818618	0.660984558541
OG_1071.Heliconiini	OG_1071	Nymphalidae	FBgn0031865	33961	Nha1	61	1444.8688524590164	289.945866932333	1381.8688524590164	279.01092730289406	012345	0.1100472167251831	Heliconiini	2.68026713427	0.121500034727	0.190821806719	0.763287226875
OG_1071.Eueides	OG_1071	Nymphalidae	FBgn0031865	33961	Nha1	61	1444.8688524590164	289.945866932333	1381.8688524590164	279.01092730289406	012345	0.1100472167251831	Eueides	0.147315166964	1	1	1
OG_10713.Heliconius	OG_10713	Nymphalidae	sp|Q5E9Z7|RPC4_BOVIN	-	-	61	1058.655737704918	182.28718876649071	995.360655737705	155.07428497937718	010020	0.1049524586370599	Heliconius	0.0644791915941	1	1	1
OG_10713.EueidesHeliconius	OG_10713	Nymphalidae	sp|Q5E9Z7|RPC4_BOVIN	-	-	61	1058.655737704918	182.28718876649071	995.360655737705	155.07428497937718	010020	0.1049524586370599	EueidesHeliconius	0.00394468188765	1	1	1
OG_10713.Heliconiini	OG_10713	Nymphalidae	sp|Q5E9Z7|RPC4_BOVIN	-	-	61	1058.655737704918	182.28718876649071	995.360655737705	155.07428497937718	010020	0.1049524586370599	Heliconiini	0.875380475239	0.180581809251	1	1
OG_10713.DioneAgraulisEueidesHeliconius	OG_10713	Nymphalidae	sp|Q5E9Z7|RPC4_BOVIN	-	-	61	1058.655737704918	182.28718876649071	995.360655737705	155.07428497937718	010020	0.1049524586370599	DioneAgraulisEueidesHeliconius	0.0899390137804	1	1	1
OG_10713.Eueides	OG_10713	Nymphalidae	sp|Q5E9Z7|RPC4_BOVIN	-	-	61	1058.655737704918	182.28718876649071	995.360655737705	155.07428497937718	010020	0.1049524586370599	Eueides	0.0583470305841	1	1	1
OG_10715.Heliconius	OG_10715	Nymphalidae	FBgn0024963	42350	GluClalpha	61	1311.4918032786886	215.37969697081473	1238.6065573770493	205.89224292018807	012345	0.04547384687548373	Heliconius	0.0684150626428	1	1	1
OG_10715.EueidesHeliconius	OG_10715	Nymphalidae	FBgn0024963	42350	GluClalpha	61	1311.4918032786886	215.37969697081473	1238.6065573770493	205.89224292018807	012345	0.04547384687548373	EueidesHeliconius	0	1	1	1
OG_10715.Heliconiini	OG_10715	Nymphalidae	FBgn0024963	42350	GluClalpha	61	1311.4918032786886	215.37969697081473	1238.6065573770493	205.89224292018807	012345	0.04547384687548373	Heliconiini	0.0210785182551	1	1	1
OG_10715.Eueides	OG_10715	Nymphalidae	FBgn0024963	42350	GluClalpha	61	1311.4918032786886	215.37969697081473	1238.6065573770493	205.89224292018807	012345	0.04547384687548373	Eueides	0	1	1	1
OG_10718.Heliconius	OG_10718	Nymphalidae	FBgn0034567	37375	CG15651	63	1430.6666666666667	211.05524741241913	1332.7142857142858	212.66117537106786	010010	0.06009785977671436	Heliconius	0.0425932148779	1	1	1
OG_10718.EueidesHeliconius	OG_10718	Nymphalidae	FBgn0034567	37375	CG15651	63	1430.6666666666667	211.05524741241913	1332.7142857142858	212.66117537106786	010010	0.06009785977671436	EueidesHeliconius	0.0206740501627	1	1	1
OG_10718.Heliconiini	OG_10718	Nymphalidae	FBgn0034567	37375	CG15651	63	1430.6666666666667	211.05524741241913	1332.7142857142858	212.66117537106786	010010	0.06009785977671436	Heliconiini	0.0695578335483	1	1	1
OG_10718.DioneAgraulisEueidesHeliconius	OG_10718	Nymphalidae	FBgn0034567	37375	CG15651	63	1430.6666666666667	211.05524741241913	1332.7142857142858	212.66117537106786	010010	0.06009785977671436	DioneAgraulisEueidesHeliconius	0.0612701731048	1	1	1
OG_10718.Eueides	OG_10718	Nymphalidae	FBgn0034567	37375	CG15651	63	1430.6666666666667	211.05524741241913	1332.7142857142858	212.66117537106786	010010	0.06009785977671436	Eueides	0.056404919671	1	1	1
OG_10723.Heliconius	OG_10723	Nymphalidae	sp|P33062|H5_VAR67	-	-	59	686.6949152542373	86.7527666216948	633.3050847457627	81.651233134904	012210	0.1135346179234219	Heliconius	0.364720574417	1	1	1
OG_10723.EueidesHeliconius	OG_10723	Nymphalidae	sp|P33062|H5_VAR67	-	-	59	686.6949152542373	86.7527666216948	633.3050847457627	81.651233134904	012210	0.1135346179234219	EueidesHeliconius	0.0694243784385	1	1	1
OG_10723.Heliconiini	OG_10723	Nymphalidae	sp|P33062|H5_VAR67	-	-	59	686.6949152542373	86.7527666216948	633.3050847457627	81.651233134904	012210	0.1135346179234219	Heliconiini	2.67524822165	0.0551561649058	0.384625159148	1
OG_10723.DioneAgraulisEueidesHeliconius	OG_10723	Nymphalidae	sp|P33062|H5_VAR67	-	-	59	686.6949152542373	86.7527666216948	633.3050847457627	81.651233134904	012210	0.1135346179234219	DioneAgraulisEueidesHeliconius	10000000000	1	0.470514269465	1
OG_10723.Eueides	OG_10723	Nymphalidae	sp|P33062|H5_VAR67	-	-	59	686.6949152542373	86.7527666216948	633.3050847457627	81.651233134904	012210	0.1135346179234219	Eueides	0.064077070812	1	1	1
OG_10724.Heliconius	OG_10724	Nymphalidae	sp|O94898|LRIG2_HUMAN	-	-	63	2705.8571428571427	407.9098039558075	2602.6190476190477	395.5068449459414	012345	0.1019279128094027	Heliconius	1.95648522363	0.05135538624	0.20834810561	0.62504431683
OG_10724.EueidesHeliconius	OG_10724	Nymphalidae	sp|O94898|LRIG2_HUMAN	-	-	63	2705.8571428571427	407.9098039558075	2602.6190476190477	395.5068449459414	012345	0.1019279128094027	EueidesHeliconius	0.0944979595304	1	1	1
OG_10724.Heliconiini	OG_10724	Nymphalidae	sp|O94898|LRIG2_HUMAN	-	-	63	2705.8571428571427	407.9098039558075	2602.6190476190477	395.5068449459414	012345	0.1019279128094027	Heliconiini	9.5635387451	0.0146633281987	0.026052224451	0.104208897804
OG_10724.Eueides	OG_10724	Nymphalidae	sp|O94898|LRIG2_HUMAN	-	-	63	2705.8571428571427	407.9098039558075	2602.6190476190477	395.5068449459414	012345	0.1019279128094027	Eueides	0.103895600877	1	1	1
OG_10726.Heliconius	OG_10726	Heliconiini	sp|P0A9M0|LON_ECOLI	-	-	54	684.6666666666666	73.49300798186329	656.6111111111111	59.50923260664767	012345	0.4689191687792102	Heliconius	1.32105857846	1	0.454534438912	1
OG_10726.EueidesHeliconius	OG_10726	Heliconiini	sp|P0A9M0|LON_ECOLI	-	-	54	684.6666666666666	73.49300798186329	656.6111111111111	59.50923260664767	012345	0.4689191687792102	EueidesHeliconius	34.4413255474	0.0309721739881	0.0282540617335	0.113016246934
OG_10726.DioneAgraulisEueidesHeliconius	OG_10726	Heliconiini	sp|P0A9M0|LON_ECOLI	-	-	54	684.6666666666666	73.49300798186329	656.6111111111111	59.50923260664767	012345	0.4689191687792102	DioneAgraulisEueidesHeliconius	0.261157843675	1	1	1
OG_10726.Eueides	OG_10726	Heliconiini	sp|P0A9M0|LON_ECOLI	-	-	54	684.6666666666666	73.49300798186329	656.6111111111111	59.50923260664767	012345	0.4689191687792102	Eueides	0.203728900139	1	1	1
OG_10728.Heliconius	OG_10728	Heliconiini	sp|D4GYH4|AGLB_HALVD	-	-	52	514.0961538461538	84.66092087656878	493.6730769230769	49.34561049523989	012345	0.3918598088560388	Heliconius	0.149679890199	1	1	1
OG_10728.EueidesHeliconius	OG_10728	Heliconiini	sp|D4GYH4|AGLB_HALVD	-	-	52	514.0961538461538	84.66092087656878	493.6730769230769	49.34561049523989	012345	0.3918598088560388	EueidesHeliconius	1.83451558829	1	0.43599306494	1
OG_10728.DioneAgraulisEueidesHeliconius	OG_10728	Heliconiini	sp|D4GYH4|AGLB_HALVD	-	-	52	514.0961538461538	84.66092087656878	493.6730769230769	49.34561049523989	012345	0.3918598088560388	DioneAgraulisEueidesHeliconius	0.130921268426	1	1	1
OG_10728.Eueides	OG_10728	Heliconiini	sp|D4GYH4|AGLB_HALVD	-	-	52	514.0961538461538	84.66092087656878	493.6730769230769	49.34561049523989	012345	0.3918598088560388	Eueides	0.327303796097	1	1	1
OG_10729.Heliconius	OG_10729	Nymphalidae	sp|Q9P0L1|ZKSC7_HUMAN	-	-	57	1553.4736842105262	286.2033447928887	1443.0526315789473	213.28297824454782	012345	0.134086539724207	Heliconius	0.10043638209	1	1	1
OG_10729.EueidesHeliconius	OG_10729	Nymphalidae	sp|Q9P0L1|ZKSC7_HUMAN	-	-	57	1553.4736842105262	286.2033447928887	1443.0526315789473	213.28297824454782	012345	0.134086539724207	EueidesHeliconius	3.59130188247	0.0527067464701	0.0789398055748	0.394699027874
OG_10729.Heliconiini	OG_10729	Nymphalidae	sp|Q9P0L1|ZKSC7_HUMAN	-	-	57	1553.4736842105262	286.2033447928887	1443.0526315789473	213.28297824454782	012345	0.134086539724207	Heliconiini	0.049604943733	1	1	1
OG_10729.DioneAgraulisEueidesHeliconius	OG_10729	Nymphalidae	sp|Q9P0L1|ZKSC7_HUMAN	-	-	57	1553.4736842105262	286.2033447928887	1443.0526315789473	213.28297824454782	012345	0.134086539724207	DioneAgraulisEueidesHeliconius	0.0180922329841	1	1	1
OG_10729.Eueides	OG_10729	Nymphalidae	sp|Q9P0L1|ZKSC7_HUMAN	-	-	57	1553.4736842105262	286.2033447928887	1443.0526315789473	213.28297824454782	012345	0.134086539724207	Eueides	0.0755677637823	1	1	1
OG_10736.Heliconius	OG_10736	Heliconiini	sp|Q3U285|LCORL_MOUSE	-	-	50	936.12	164.81221313968211	842.94	121.09077751835603	012345	0.4194164467598126	Heliconius	0.395056483607	1	1	1
OG_10736.Eueides	OG_10736	Heliconiini	sp|Q3U285|LCORL_MOUSE	-	-	50	936.12	164.81221313968211	842.94	121.09077751835603	012345	0.4194164467598126	Eueides	4.95354552487	0.136336980748	0.108016098467	0.216032196934
OG_1074.Heliconius	OG_1074	Nymphalidae	FBgn0032475	34709	Sfmbt	63	2102.1428571428573	459.33163511825325	2008.6190476190477	434.9882840447957	012345	0.07740852184327393	Heliconius	0.0816068521844	1	1	1
OG_1074.EueidesHeliconius	OG_1074	Nymphalidae	FBgn0032475	34709	Sfmbt	63	2102.1428571428573	459.33163511825325	2008.6190476190477	434.9882840447957	012345	0.07740852184327393	EueidesHeliconius	5.63233013559	0.017389980167	0.0472931767648	0.141879530294
OG_1074.Heliconiini	OG_1074	Nymphalidae	FBgn0032475	34709	Sfmbt	63	2102.1428571428573	459.33163511825325	2008.6190476190477	434.9882840447957	012345	0.07740852184327393	Heliconiini	23.1655163375	0.0310497203754	0.0127525270032	0.0637626350161
OG_1074.DioneAgraulisEueidesHeliconius	OG_1074	Nymphalidae	FBgn0032475	34709	Sfmbt	63	2102.1428571428573	459.33163511825325	2008.6190476190477	434.9882840447957	012345	0.07740852184327393	DioneAgraulisEueidesHeliconius	3846.11686426	0.00465953067695	0.0468964070276	0.18758562811
OG_1074.Eueides	OG_1074	Nymphalidae	FBgn0032475	34709	Sfmbt	63	2102.1428571428573	459.33163511825325	2008.6190476190477	434.9882840447957	012345	0.07740852184327393	Eueides	1.6885014005	0.0796046056912	0.341240210635	0.682480421269
OG_10741.Heliconius	OG_10741	Heliconiinae	sp|Q8N9F7|GDPD1_HUMAN	-	-	51	791.2941176470588	222.67590923499836	683.1764705882352	61.84252800376286	012345	0.4986956177674479	Heliconius	0.739743611608	1	1	1
OG_10741.DioneAgraulisEueidesHeliconius	OG_10741	Heliconiinae	sp|Q8N9F7|GDPD1_HUMAN	-	-	51	791.2941176470588	222.67590923499836	683.1764705882352	61.84252800376286	012345	0.4986956177674479	DioneAgraulisEueidesHeliconius	72.2404305251	0.0352218183278	0.110898238369	0.332694715107
OG_10741.Eueides	OG_10741	Heliconiinae	sp|Q8N9F7|GDPD1_HUMAN	-	-	51	791.2941176470588	222.67590923499836	683.1764705882352	61.84252800376286	012345	0.4986956177674479	Eueides	0.617591588612	1	1	1
OG_1075.Heliconius	OG_1075	Nymphalidae	FBgn0034422	37204	CG7137	62	1398.3870967741937	289.83862889761383	1268.8064516129032	276.0809160670857	012345	0.2391793132858796	Heliconius	0.16034781969	1	1	1
OG_1075.EueidesHeliconius	OG_1075	Nymphalidae	FBgn0034422	37204	CG7137	62	1398.3870967741937	289.83862889761383	1268.8064516129032	276.0809160670857	012345	0.2391793132858796	EueidesHeliconius	7.75797901297	0.0551552476522	0.0114354159337	0.0571770796684
OG_1075.Heliconiini	OG_1075	Nymphalidae	FBgn0034422	37204	CG7137	62	1398.3870967741937	289.83862889761383	1268.8064516129032	276.0809160670857	012345	0.2391793132858796	Heliconiini	1.06061423047	0.173524027782	0.486166990339	0.972333980678
OG_1075.DioneAgraulisEueidesHeliconius	OG_1075	Nymphalidae	FBgn0034422	37204	CG7137	62	1398.3870967741937	289.83862889761383	1268.8064516129032	276.0809160670857	012345	0.2391793132858796	DioneAgraulisEueidesHeliconius	4.01620585902	0.0301706967498	0.11593912004	0.463756480162
OG_1075.Eueides	OG_1075	Nymphalidae	FBgn0034422	37204	CG7137	62	1398.3870967741937	289.83862889761383	1268.8064516129032	276.0809160670857	012345	0.2391793132858796	Eueides	1.24771469793	0.278394967342	0.404374738782	1
OG_10750.Heliconius	OG_10750	Nymphalidae	sp|P35031|TRY1_SALSA	-	-	60	749.95	175.9830886761566	620.1	139.26194742283337	012345	0.180808123448899	Heliconius	9.14214608862	0.0723182692955	0.0393837959318	0.157535183727
OG_10750.EueidesHeliconius	OG_10750	Nymphalidae	sp|P35031|TRY1_SALSA	-	-	60	749.95	175.9830886761566	620.1	139.26194742283337	012345	0.180808123448899	EueidesHeliconius	2.19232541903	0.0940836277777	0.269375443687	0.808126331062
OG_10750.Heliconiini	OG_10750	Nymphalidae	sp|P35031|TRY1_SALSA	-	-	60	749.95	175.9830886761566	620.1	139.26194742283337	012345	0.180808123448899	Heliconiini	0.150479800232	1	1	1
OG_10750.Eueides	OG_10750	Nymphalidae	sp|P35031|TRY1_SALSA	-	-	60	749.95	175.9830886761566	620.1	139.26194742283337	012345	0.180808123448899	Eueides	0.188581570328	1	1	1
OG_10766.Heliconius	OG_10766	Heliconiini	sp|Q7XDH8|KRP4_ORYSJ	-	-	51	455.70588235294116	74.86989869168922	382.7647058823529	15.505328919874444	010020	0.1770144948388556	Heliconius	0.0654914560546	1	1	1
OG_10766.EueidesHeliconius	OG_10766	Heliconiini	sp|Q7XDH8|KRP4_ORYSJ	-	-	51	455.70588235294116	74.86989869168922	382.7647058823529	15.505328919874444	010020	0.1770144948388556	EueidesHeliconius	0.228299435148	1	1	1
OG_10766.Eueides	OG_10766	Heliconiini	sp|Q7XDH8|KRP4_ORYSJ	-	-	51	455.70588235294116	74.86989869168922	382.7647058823529	15.505328919874444	010020	0.1770144948388556	Eueides	0.263341531961	1	1	1
OG_10769.Heliconius	OG_10769	Nymphalidae	sp|Q63ZW2|MC25A_DANRE	-	-	55	514.5818181818182	119.10464320528337	483.6	111.57037730020048	012345	0.137994911747636	Heliconius	0.0702117653229	1	1	1
OG_10769.EueidesHeliconius	OG_10769	Nymphalidae	sp|Q63ZW2|MC25A_DANRE	-	-	55	514.5818181818182	119.10464320528337	483.6	111.57037730020048	012345	0.137994911747636	EueidesHeliconius	0.0612367481681	1	1	1
OG_10769.Heliconiini	OG_10769	Nymphalidae	sp|Q63ZW2|MC25A_DANRE	-	-	55	514.5818181818182	119.10464320528337	483.6	111.57037730020048	012345	0.137994911747636	Heliconiini	0.323735200927	1	1	1
OG_10769.DioneAgraulisEueidesHeliconius	OG_10769	Nymphalidae	sp|Q63ZW2|MC25A_DANRE	-	-	55	514.5818181818182	119.10464320528337	483.6	111.57037730020048	012345	0.137994911747636	DioneAgraulisEueidesHeliconius	95.5522027505	0.0225474570466	0.012481973245	0.0624098662251
OG_10769.Eueides	OG_10769	Nymphalidae	sp|Q63ZW2|MC25A_DANRE	-	-	55	514.5818181818182	119.10464320528337	483.6	111.57037730020048	012345	0.137994911747636	Eueides	2.99776589188	0.0277762652235	0.280016606768	1
OG_10772.Heliconius	OG_10772	Heliconiinae	sp|P0DKT2|TU92_GEMSO	-	-	59	1271.8474576271187	248.57934064445354	1165.8305084745762	232.35209638897518	012230	0.3458050342337365	Heliconius	0.298033671021	1	1	1
OG_10772.EueidesHeliconius	OG_10772	Heliconiinae	sp|P0DKT2|TU92_GEMSO	-	-	59	1271.8474576271187	248.57934064445354	1165.8305084745762	232.35209638897518	012230	0.3458050342337365	EueidesHeliconius	76.5354368696	0.029261868437	0.00136904055549	0.00547616222194
OG_10772.DioneAgraulisEueidesHeliconius	OG_10772	Heliconiinae	sp|P0DKT2|TU92_GEMSO	-	-	59	1271.8474576271187	248.57934064445354	1165.8305084745762	232.35209638897518	012230	0.3458050342337365	DioneAgraulisEueidesHeliconius	1.0010985979	1	0.5	1
OG_10772.Eueides	OG_10772	Heliconiinae	sp|P0DKT2|TU92_GEMSO	-	-	59	1271.8474576271187	248.57934064445354	1165.8305084745762	232.35209638897518	012230	0.3458050342337365	Eueides	0.337938201229	1	1	1
OG_10779.Heliconius	OG_10779	Nymphalidae	sp|Q9Y6G5|COMDA_HUMAN	-	-	54	578.0	59.481089431852205	566.5	55.619990411122274	012345	0.1207198824180572	Heliconius	0.129648950011	1	1	1
OG_10779.EueidesHeliconius	OG_10779	Nymphalidae	sp|Q9Y6G5|COMDA_HUMAN	-	-	54	578.0	59.481089431852205	566.5	55.619990411122274	012345	0.1207198824180572	EueidesHeliconius	0.0176515748743	1	1	1
OG_10779.Heliconiini	OG_10779	Nymphalidae	sp|Q9Y6G5|COMDA_HUMAN	-	-	54	578.0	59.481089431852205	566.5	55.619990411122274	012345	0.1207198824180572	Heliconiini	1.56640302233	1	0.489555347571	1
OG_10779.DioneAgraulisEueidesHeliconius	OG_10779	Nymphalidae	sp|Q9Y6G5|COMDA_HUMAN	-	-	54	578.0	59.481089431852205	566.5	55.619990411122274	012345	0.1207198824180572	DioneAgraulisEueidesHeliconius	0	1	1	1
OG_10779.Eueides	OG_10779	Nymphalidae	sp|Q9Y6G5|COMDA_HUMAN	-	-	54	578.0	59.481089431852205	566.5	55.619990411122274	012345	0.1207198824180572	Eueides	0.209114236318	1	1	1
OG_10780.Heliconius	OG_10780	Nymphalidae	sp|Q6ZVL6|K154L_HUMAN	-	-	49	498.48979591836735	38.58736308371264	459.6734693877551	12.917932094418273	012345	0.05994583220728595	Heliconius	22.7507326664	0.043252991101	0.00576304320442	0.0172891296133
OG_10780.EueidesHeliconius	OG_10780	Nymphalidae	sp|Q6ZVL6|K154L_HUMAN	-	-	49	498.48979591836735	38.58736308371264	459.6734693877551	12.917932094418273	012345	0.05994583220728595	EueidesHeliconius	63.3117081299	0.0600999917357	3.7792432027e-05	0.000151169728108
OG_10780.DioneAgraulisEueidesHeliconius	OG_10780	Nymphalidae	sp|Q6ZVL6|K154L_HUMAN	-	-	49	498.48979591836735	38.58736308371264	459.6734693877551	12.917932094418273	012345	0.05994583220728595	DioneAgraulisEueidesHeliconius	9090.0	0.0772210807081	0.0634593366052	0.12691867321
OG_10780.Eueides	OG_10780	Nymphalidae	sp|Q6ZVL6|K154L_HUMAN	-	-	49	498.48979591836735	38.58736308371264	459.6734693877551	12.917932094418273	012345	0.05994583220728595	Eueides	0.182800729334	1	1	1
OG_10783.Eueides	OG_10783	Heliconiinae	sp|P12492|ENV_SIVS4	-	-	51	613.9411764705883	107.84927968247021	557.4705882352941	57.88845018101505	012345	0.3446168093955845	Eueides	0.317779536882	1	1	1
OG_10783.EueidesHeliconius	OG_10783	Heliconiinae	sp|P12492|ENV_SIVS4	-	-	51	613.9411764705883	107.84927968247021	557.4705882352941	57.88845018101505	012345	0.3446168093955845	EueidesHeliconius	0.81092945945	1	1	1
OG_10783.DioneAgraulisEueidesHeliconius	OG_10783	Heliconiinae	sp|P12492|ENV_SIVS4	-	-	51	613.9411764705883	107.84927968247021	557.4705882352941	57.88845018101505	012345	0.3446168093955845	DioneAgraulisEueidesHeliconius	0.308511191524	1	1	1
OG_10783.Heliconius	OG_10783	Heliconiinae	sp|P12492|ENV_SIVS4	-	-	51	613.9411764705883	107.84927968247021	557.4705882352941	57.88845018101505	012345	0.3446168093955845	Heliconius	0.561161120958	1	1	1
OG_10786.Heliconius	OG_10786	Heliconiini	sp|Q8WZ42|TITIN_HUMAN	-	-	48	861.4375	161.13657590302086	796.3125	68.75201701586653	012345	0.1539932332614297	Heliconius	0.100235380605	1	1	1
OG_10786.EueidesHeliconius	OG_10786	Heliconiini	sp|Q8WZ42|TITIN_HUMAN	-	-	48	861.4375	161.13657590302086	796.3125	68.75201701586653	012345	0.1539932332614297	EueidesHeliconius	64.0794862058	0.00638840127788	0.0680932076951	0.27237283078
OG_10786.DioneAgraulisEueidesHeliconius	OG_10786	Heliconiini	sp|Q8WZ42|TITIN_HUMAN	-	-	48	861.4375	161.13657590302086	796.3125	68.75201701586653	012345	0.1539932332614297	DioneAgraulisEueidesHeliconius	0.0949018657185	1	1	1
OG_10786.Eueides	OG_10786	Heliconiini	sp|Q8WZ42|TITIN_HUMAN	-	-	48	861.4375	161.13657590302086	796.3125	68.75201701586653	012345	0.1539932332614297	Eueides	0.0762333959348	1	1	1
OG_10792.Heliconius	OG_10792	Nymphalidae	sp|A5F599|F16PA_VIBC3	-	-	59	943.728813559322	180.30330665331067	922.6779661016949	178.21254123515095	012345	0.03817583994104714	Heliconius	0.0170113324663	1	1	1
OG_10792.EueidesHeliconius	OG_10792	Nymphalidae	sp|A5F599|F16PA_VIBC3	-	-	59	943.728813559322	180.30330665331067	922.6779661016949	178.21254123515095	012345	0.03817583994104714	EueidesHeliconius	0.0127377769824	1	1	1
OG_10792.Heliconiini	OG_10792	Nymphalidae	sp|A5F599|F16PA_VIBC3	-	-	59	943.728813559322	180.30330665331067	922.6779661016949	178.21254123515095	012345	0.03817583994104714	Heliconiini	2.09966488878	0.0271751410448	0.349699895511	1
OG_10792.Eueides	OG_10792	Nymphalidae	sp|A5F599|F16PA_VIBC3	-	-	59	943.728813559322	180.30330665331067	922.6779661016949	178.21254123515095	012345	0.03817583994104714	Eueides	0.0198028292683	1	1	1
OG_1080.Heliconius	OG_1080	Nymphalidae	FBgn0034021	36713	CG8180	61	1062.344262295082	191.09193438005576	890.4590163934427	136.78061574994518	012345	0.04868181508872802	Heliconius	0.0456075809336	1	1	1
OG_1080.EueidesHeliconius	OG_1080	Nymphalidae	FBgn0034021	36713	CG8180	61	1062.344262295082	191.09193438005576	890.4590163934427	136.78061574994518	012345	0.04868181508872802	EueidesHeliconius	3846.11686426	0.00335262913022	0.00130558002108	0.00652790010539
OG_1080.Heliconiini	OG_1080	Nymphalidae	FBgn0034021	36713	CG8180	61	1062.344262295082	191.09193438005576	890.4590163934427	136.78061574994518	012345	0.04868181508872802	Heliconiini	3.85579324026	0.0244516764437	0.211229893223	0.844919572891
OG_1080.DioneAgraulisEueidesHeliconius	OG_1080	Nymphalidae	FBgn0034021	36713	CG8180	61	1062.344262295082	191.09193438005576	890.4590163934427	136.78061574994518	012345	0.04868181508872802	DioneAgraulisEueidesHeliconius	0.0379448276837	1	1	1
OG_1080.Eueides	OG_1080	Nymphalidae	FBgn0034021	36713	CG8180	61	1062.344262295082	191.09193438005576	890.4590163934427	136.78061574994518	012345	0.04868181508872802	Eueides	0.0293828965421	1	1	1
OG_10805.Heliconius	OG_10805	Heliconiini	sp|B1X0K6|SECA_CYAA5	-	-	39	400.15384615384613	45.00059171208606	361.3076923076923	3.5166552155884494	012345	1.298601748912138	Heliconius	10000000000	1	0.37937241691	1
OG_10805.DioneAgraulisEueidesHeliconius	OG_10805	Heliconiini	sp|B1X0K6|SECA_CYAA5	-	-	39	400.15384615384613	45.00059171208606	361.3076923076923	3.5166552155884494	012345	1.298601748912138	DioneAgraulisEueidesHeliconius	0.592557367936	1	1	1
OG_10805.Eueides	OG_10805	Heliconiini	sp|B1X0K6|SECA_CYAA5	-	-	39	400.15384615384613	45.00059171208606	361.3076923076923	3.5166552155884494	012345	1.298601748912138	Eueides	0.969659605266	1	1	1
OG_10808.Heliconius	OG_10808	Nymphalidae	FBgn0000253	36329	Cam	57	701.3684210526316	111.09844403018423	652.1578947368421	91.6286918738625	012345	0.1061708419042509	Heliconius	0.0686581925146	1	1	1
OG_10808.EueidesHeliconius	OG_10808	Nymphalidae	FBgn0000253	36329	Cam	57	701.3684210526316	111.09844403018423	652.1578947368421	91.6286918738625	012345	0.1061708419042509	EueidesHeliconius	0.0993974438932	1	1	1
OG_10808.Heliconiini	OG_10808	Nymphalidae	FBgn0000253	36329	Cam	57	701.3684210526316	111.09844403018423	652.1578947368421	91.6286918738625	012345	0.1061708419042509	Heliconiini	3846.11651103	0.0108905201731	0.0962586282828	0.481293141414
OG_10808.DioneAgraulisEueidesHeliconius	OG_10808	Nymphalidae	FBgn0000253	36329	Cam	57	701.3684210526316	111.09844403018423	652.1578947368421	91.6286918738625	012345	0.1061708419042509	DioneAgraulisEueidesHeliconius	0.0427211790685	1	1	1
OG_10808.Eueides	OG_10808	Nymphalidae	FBgn0000253	36329	Cam	57	701.3684210526316	111.09844403018423	652.1578947368421	91.6286918738625	012345	0.1061708419042509	Eueides	0.140127153933	1	1	1
OG_1081.Heliconius	OG_1081	Nymphalidae	FBgn0283494	37834	Ak2	61	740.8032786885246	170.57009709218403	709.4754098360655	61.646162859693376	012345	0.09218311560146515	Heliconius	0.117007501394	1	1	1
OG_1081.EueidesHeliconius	OG_1081	Nymphalidae	FBgn0283494	37834	Ak2	61	740.8032786885246	170.57009709218403	709.4754098360655	61.646162859693376	012345	0.09218311560146515	EueidesHeliconius	0.0724733450593	1	1	1
OG_1081.Heliconiini	OG_1081	Nymphalidae	FBgn0283494	37834	Ak2	61	740.8032786885246	170.57009709218403	709.4754098360655	61.646162859693376	012345	0.09218311560146515	Heliconiini	0.0688174854389	1	1	1
OG_1081.DioneAgraulisEueidesHeliconius	OG_1081	Nymphalidae	FBgn0283494	37834	Ak2	61	740.8032786885246	170.57009709218403	709.4754098360655	61.646162859693376	012345	0.09218311560146515	DioneAgraulisEueidesHeliconius	23.5939268463	0.0211884026616	0.0900569707163	0.450284853582
OG_1081.Eueides	OG_1081	Nymphalidae	FBgn0283494	37834	Ak2	61	740.8032786885246	170.57009709218403	709.4754098360655	61.646162859693376	012345	0.09218311560146515	Eueides	0.115624406617	1	1	1
OG_10817.Heliconius	OG_10817	Nymphalidae	sp|P76341|HIUH_ECOLI	-	-	55	345.1636363636364	33.83207925589055	334.8545454545455	21.038854256583278	012345	0.08988038031352409	Heliconius	0.0724854224104	1	1	1
OG_10817.EueidesHeliconius	OG_10817	Nymphalidae	sp|P76341|HIUH_ECOLI	-	-	55	345.1636363636364	33.83207925589055	334.8545454545455	21.038854256583278	012345	0.08988038031352409	EueidesHeliconius	28.9800702067	0.0204672997095	0.0718715775807	0.359357887904
OG_10817.Heliconiini	OG_10817	Nymphalidae	sp|P76341|HIUH_ECOLI	-	-	55	345.1636363636364	33.83207925589055	334.8545454545455	21.038854256583278	012345	0.08988038031352409	Heliconiini	3.34934985714	0.0968895842901	0.229626472071	0.918505888285
OG_10817.DioneAgraulisEueidesHeliconius	OG_10817	Nymphalidae	sp|P76341|HIUH_ECOLI	-	-	55	345.1636363636364	33.83207925589055	334.8545454545455	21.038854256583278	012345	0.08988038031352409	DioneAgraulisEueidesHeliconius	0	1	1	1
OG_10817.Eueides	OG_10817	Nymphalidae	sp|P76341|HIUH_ECOLI	-	-	55	345.1636363636364	33.83207925589055	334.8545454545455	21.038854256583278	012345	0.08988038031352409	Eueides	0.0602264623574	1	1	1
OG_1082.Heliconius	OG_1082	Nymphalidae	FBgn0030882	318053	Gss1	62	1478.9032258064517	258.9838523847496	1407.774193548387	270.6936978278299	012345	0.04561206687290246	Heliconius	0.0183752079236	1	1	1
OG_1082.EueidesHeliconius	OG_1082	Nymphalidae	FBgn0030882	318053	Gss1	62	1478.9032258064517	258.9838523847496	1407.774193548387	270.6936978278299	012345	0.04561206687290246	EueidesHeliconius	0	1	1	1
OG_1082.Heliconiini	OG_1082	Nymphalidae	FBgn0030882	318053	Gss1	62	1478.9032258064517	258.9838523847496	1407.774193548387	270.6936978278299	012345	0.04561206687290246	Heliconiini	0.0305777332658	1	1	1
OG_1082.DioneAgraulisEueidesHeliconius	OG_1082	Nymphalidae	FBgn0030882	318053	Gss1	62	1478.9032258064517	258.9838523847496	1407.774193548387	270.6936978278299	012345	0.04561206687290246	DioneAgraulisEueidesHeliconius	0	1	1	1
OG_1082.Eueides	OG_1082	Nymphalidae	FBgn0030882	318053	Gss1	62	1478.9032258064517	258.9838523847496	1407.774193548387	270.6936978278299	012345	0.04561206687290246	Eueides	0.0535807807148	1	1	1
OG_10821.Heliconius	OG_10821	Heliconiini	-	47757	-	51	916.9411764705883	51.31846427053819	888.2352941176471	36.985735583846385	012345	0.08733166924820071	Heliconius	0.015698562847	1	1	1
OG_10821.EueidesHeliconius	OG_10821	Heliconiini	-	47757	-	51	916.9411764705883	51.31846427053819	888.2352941176471	36.985735583846385	012345	0.08733166924820071	EueidesHeliconius	0	1	1	1
OG_10821.DioneAgraulisEueidesHeliconius	OG_10821	Heliconiini	-	47757	-	51	916.9411764705883	51.31846427053819	888.2352941176471	36.985735583846385	012345	0.08733166924820071	DioneAgraulisEueidesHeliconius	0.0705035049162	1	1	1
OG_10821.Eueides	OG_10821	Heliconiini	-	47757	-	51	916.9411764705883	51.31846427053819	888.2352941176471	36.985735583846385	012345	0.08733166924820071	Eueides	100000	0.00469616305613	0.147105613172	0.588422452687
OG_10822.Heliconius	OG_10822	Nymphalidae	FBgn0052829	318235	CG32829	57	1258.842105263158	361.33426180402904	1222.6842105263158	335.3438224037782	012230	0.0611661666655811	Heliconius	0.0364404439382	1	1	1
OG_10822.EueidesHeliconius	OG_10822	Nymphalidae	FBgn0052829	318235	CG32829	57	1258.842105263158	361.33426180402904	1222.6842105263158	335.3438224037782	012230	0.0611661666655811	EueidesHeliconius	0.0277914310323	1	1	1
OG_10822.DioneAgraulisEueidesHeliconius	OG_10822	Nymphalidae	FBgn0052829	318235	CG32829	57	1258.842105263158	361.33426180402904	1222.6842105263158	335.3438224037782	012230	0.0611661666655811	DioneAgraulisEueidesHeliconius	0	1	1	1
OG_10822.Eueides	OG_10822	Nymphalidae	FBgn0052829	318235	CG32829	57	1258.842105263158	361.33426180402904	1222.6842105263158	335.3438224037782	012230	0.0611661666655811	Eueides	2.07425926625	0.0294078117183	0.5	1
OG_10823.Heliconius	OG_10823	Nymphalidae	sp|Q05632|CBIT_SALTY	-	-	60	768.7	171.41648112127373	664.5	141.45617695950926	012345	0.09092854990178341	Heliconius	0.354326851641	1	1	1
OG_10823.EueidesHeliconius	OG_10823	Nymphalidae	sp|Q05632|CBIT_SALTY	-	-	60	768.7	171.41648112127373	664.5	141.45617695950926	012345	0.09092854990178341	EueidesHeliconius	0.210001886169	1	1	1
OG_10823.Heliconiini	OG_10823	Nymphalidae	sp|Q05632|CBIT_SALTY	-	-	60	768.7	171.41648112127373	664.5	141.45617695950926	012345	0.09092854990178341	Heliconiini	0.0316489138835	1	1	1
OG_10823.Eueides	OG_10823	Nymphalidae	sp|Q05632|CBIT_SALTY	-	-	60	768.7	171.41648112127373	664.5	141.45617695950926	012345	0.09092854990178341	Eueides	0.0399018678087	1	1	1
OG_10825.Heliconius	OG_10825	Nymphalidae	-	47757	-	58	547.7586206896551	82.6818393821445	525.3103448275862	65.41833732602643	012230	0.1134607967045347	Heliconius	0.0942971844197	1	1	1
OG_10825.EueidesHeliconius	OG_10825	Nymphalidae	-	47757	-	58	547.7586206896551	82.6818393821445	525.3103448275862	65.41833732602643	012230	0.1134607967045347	EueidesHeliconius	0.0458915347826	1	1	1
OG_10825.Heliconiini	OG_10825	Nymphalidae	-	47757	-	58	547.7586206896551	82.6818393821445	525.3103448275862	65.41833732602643	012230	0.1134607967045347	Heliconiini	0.0885569187789	1	1	1
OG_10825.Eueides	OG_10825	Nymphalidae	-	47757	-	58	547.7586206896551	82.6818393821445	525.3103448275862	65.41833732602643	012230	0.1134607967045347	Eueides	0.0211284574012	1	1	1
OG_10827.Heliconius	OG_10827	Nymphalidae	FBgn0014411	31144	Vps26	59	868.1186440677966	144.80063263577534	833.5932203389831	155.3075809476115	012210	0.08991032720652739	Heliconius	0.0321387615744	1	1	1
OG_10827.Heliconiini	OG_10827	Nymphalidae	FBgn0014411	31144	Vps26	59	868.1186440677966	144.80063263577534	833.5932203389831	155.3075809476115	012210	0.08991032720652739	Heliconiini	0.10582552656	1	1	1
OG_10827.DioneAgraulisEueidesHeliconius	OG_10827	Nymphalidae	FBgn0014411	31144	Vps26	59	868.1186440677966	144.80063263577534	833.5932203389831	155.3075809476115	012210	0.08991032720652739	DioneAgraulisEueidesHeliconius	0.0219381054469	1	1	1
OG_10827.Eueides	OG_10827	Nymphalidae	FBgn0014411	31144	Vps26	59	868.1186440677966	144.80063263577534	833.5932203389831	155.3075809476115	012210	0.08991032720652739	Eueides	110.266036449	0.00435240531367	0.0824273838441	0.329709535377
OG_1083.Heliconius	OG_1083	Nymphalidae	FBgn0053129	34514	CG33129	63	1813.857142857143	387.8576427252764	1780.6666666666667	410.26534193574145	012230	0.09801655629948265	Heliconius	0.0735245748769	1	1	1
OG_1083.EueidesHeliconius	OG_1083	Nymphalidae	FBgn0053129	34514	CG33129	63	1813.857142857143	387.8576427252764	1780.6666666666667	410.26534193574145	012230	0.09801655629948265	EueidesHeliconius	0.0653907726554	1	1	1
OG_1083.Heliconiini	OG_1083	Nymphalidae	FBgn0053129	34514	CG33129	63	1813.857142857143	387.8576427252764	1780.6666666666667	410.26534193574145	012230	0.09801655629948265	Heliconiini	0.106615020663	1	1	1
OG_1083.DioneAgraulisEueidesHeliconius	OG_1083	Nymphalidae	FBgn0053129	34514	CG33129	63	1813.857142857143	387.8576427252764	1780.6666666666667	410.26534193574145	012230	0.09801655629948265	DioneAgraulisEueidesHeliconius	0.0773523565671	1	1	1
OG_1083.Eueides	OG_1083	Nymphalidae	FBgn0053129	34514	CG33129	63	1813.857142857143	387.8576427252764	1780.6666666666667	410.26534193574145	012230	0.09801655629948265	Eueides	0.250447662186	1	1	1
OG_10835.Heliconius	OG_10835	Nymphalidae	sp|Q7TT28|REXO1_MOUSE	-	-	60	3025.35	561.888981472319	2990.0	563.228372864862	012345	0.1176279543078747	Heliconius	0.170869168555	1	1	1
OG_10835.EueidesHeliconius	OG_10835	Nymphalidae	sp|Q7TT28|REXO1_MOUSE	-	-	60	3025.35	561.888981472319	2990.0	563.228372864862	012345	0.1176279543078747	EueidesHeliconius	2.0158804438	0.0733378442872	0.330061385633	1
OG_10835.Heliconiini	OG_10835	Nymphalidae	sp|Q7TT28|REXO1_MOUSE	-	-	60	3025.35	561.888981472319	2990.0	563.228372864862	012345	0.1176279543078747	Heliconiini	377.857478387	0.00973021542658	0.278553156682	1
OG_10835.DioneAgraulisEueidesHeliconius	OG_10835	Nymphalidae	sp|Q7TT28|REXO1_MOUSE	-	-	60	3025.35	561.888981472319	2990.0	563.228372864862	012345	0.1176279543078747	DioneAgraulisEueidesHeliconius	0.0957559229511	1	1	1
OG_10835.Eueides	OG_10835	Nymphalidae	sp|Q7TT28|REXO1_MOUSE	-	-	60	3025.35	561.888981472319	2990.0	563.228372864862	012345	0.1176279543078747	Eueides	0.126249057568	1	1	1
OG_10836.Heliconius	OG_10836	Nymphalidae	sp|Q5ZIH9|CC174_CHICK	-	-	63	1572.142857142857	344.2297524168699	1506.1904761904761	298.117844875322	012345	0.1616770662457725	Heliconius	4.18365302508	0.0382672135904	0.115913497973	0.579567489864
OG_10836.EueidesHeliconius	OG_10836	Nymphalidae	sp|Q5ZIH9|CC174_CHICK	-	-	63	1572.142857142857	344.2297524168699	1506.1904761904761	298.117844875322	012345	0.1616770662457725	EueidesHeliconius	0.0791241528715	1	1	1
OG_10836.Heliconiini	OG_10836	Nymphalidae	sp|Q5ZIH9|CC174_CHICK	-	-	63	1572.142857142857	344.2297524168699	1506.1904761904761	298.117844875322	012345	0.1616770662457725	Heliconiini	1.80321681757	0.0789352089795	0.146958790416	0.587835161663
OG_10836.DioneAgraulisEueidesHeliconius	OG_10836	Nymphalidae	sp|Q5ZIH9|CC174_CHICK	-	-	63	1572.142857142857	344.2297524168699	1506.1904761904761	298.117844875322	012345	0.1616770662457725	DioneAgraulisEueidesHeliconius	213.190320436	1	0.459240299351	1
OG_10836.Eueides	OG_10836	Nymphalidae	sp|Q5ZIH9|CC174_CHICK	-	-	63	1572.142857142857	344.2297524168699	1506.1904761904761	298.117844875322	012345	0.1616770662457725	Eueides	0.19542172092	1	1	1
OG_10838.Heliconius	OG_10838	Nymphalidae	FBgn0040212	53586	Gnpat	62	1794.725806451613	375.0161359691778	1723.5967741935483	376.4136134316756	012345	0.1563059043857795	Heliconius	0.124542867748	1	1	1
OG_10838.EueidesHeliconius	OG_10838	Nymphalidae	FBgn0040212	53586	Gnpat	62	1794.725806451613	375.0161359691778	1723.5967741935483	376.4136134316756	012345	0.1563059043857795	EueidesHeliconius	0.07378027864	1	1	1
OG_10838.Heliconiini	OG_10838	Nymphalidae	FBgn0040212	53586	Gnpat	62	1794.725806451613	375.0161359691778	1723.5967741935483	376.4136134316756	012345	0.1563059043857795	Heliconiini	0.835606507415	0.267554138585	1	1
OG_10838.DioneAgraulisEueidesHeliconius	OG_10838	Nymphalidae	FBgn0040212	53586	Gnpat	62	1794.725806451613	375.0161359691778	1723.5967741935483	376.4136134316756	012345	0.1563059043857795	DioneAgraulisEueidesHeliconius	1557.69953594	0.00307286225064	0.0130129372926	0.0650646864631
OG_10838.Eueides	OG_10838	Nymphalidae	FBgn0040212	53586	Gnpat	62	1794.725806451613	375.0161359691778	1723.5967741935483	376.4136134316756	012345	0.1563059043857795	Eueides	1.65933191986	0.0633000376322	0.351097874024	1
OG_10839.Heliconius	OG_10839	Heliconiini	sp|D8KY57|SSP_BOMIG	-	-	49	459.9183673469388	148.19551849990907	376.9591836734694	70.7118207892684	010020	0.2329296593457097	Heliconius	3846.11686423	0.00846895928035	0.0696939769052	0.209081930716
OG_10839.EueidesHeliconius	OG_10839	Heliconiini	sp|D8KY57|SSP_BOMIG	-	-	49	459.9183673469388	148.19551849990907	376.9591836734694	70.7118207892684	010020	0.2329296593457097	EueidesHeliconius	0.0408990493975	1	1	1
OG_10839.Eueides	OG_10839	Heliconiini	sp|D8KY57|SSP_BOMIG	-	-	49	459.9183673469388	148.19551849990907	376.9591836734694	70.7118207892684	010020	0.2329296593457097	Eueides	0.335183411069	1	1	1
OG_10840.Heliconius	OG_10840	Nymphalidae	sp|D8KY57|SSP_BOMIG	-	-	47	310.0851063829787	153.15877310222936	264.0	0.0	010020	0.05393483666887826	Heliconius	0	1	1	1
OG_10840.EueidesHeliconius	OG_10840	Nymphalidae	sp|D8KY57|SSP_BOMIG	-	-	47	310.0851063829787	153.15877310222936	264.0	0.0	010020	0.05393483666887826	EueidesHeliconius	0.202333973301	1	1	1
OG_10840.Heliconiini	OG_10840	Nymphalidae	sp|D8KY57|SSP_BOMIG	-	-	47	310.0851063829787	153.15877310222936	264.0	0.0	010020	0.05393483666887826	Heliconiini	0.0298260649043	1	1	1
OG_10840.DioneAgraulisEueidesHeliconius	OG_10840	Nymphalidae	sp|D8KY57|SSP_BOMIG	-	-	47	310.0851063829787	153.15877310222936	264.0	0.0	010020	0.05393483666887826	DioneAgraulisEueidesHeliconius	0	1	1	1
OG_10840.Eueides	OG_10840	Nymphalidae	sp|D8KY57|SSP_BOMIG	-	-	47	310.0851063829787	153.15877310222936	264.0	0.0	010020	0.05393483666887826	Eueides	0	1	1	1
OG_10841.Heliconius	OG_10841	Nymphalidae	sp|Q9W266|WDP_DROME	-	-	63	2028.4285714285713	299.10860767231935	1951.3333333333333	304.55108779868954	012345	0.09701790744469493	Heliconius	0.0470825542659	1	1	1
OG_10841.EueidesHeliconius	OG_10841	Nymphalidae	sp|Q9W266|WDP_DROME	-	-	63	2028.4285714285713	299.10860767231935	1951.3333333333333	304.55108779868954	012345	0.09701790744469493	EueidesHeliconius	0.0430341908707	1	1	1
OG_10841.Heliconiini	OG_10841	Nymphalidae	sp|Q9W266|WDP_DROME	-	-	63	2028.4285714285713	299.10860767231935	1951.3333333333333	304.55108779868954	012345	0.09701790744469493	Heliconiini	0.717941254432	0.124780085418	1	1
OG_10841.DioneAgraulisEueidesHeliconius	OG_10841	Nymphalidae	sp|Q9W266|WDP_DROME	-	-	63	2028.4285714285713	299.10860767231935	1951.3333333333333	304.55108779868954	012345	0.09701790744469493	DioneAgraulisEueidesHeliconius	0.0471002080785	1	1	1
OG_10841.Eueides	OG_10841	Nymphalidae	sp|Q9W266|WDP_DROME	-	-	63	2028.4285714285713	299.10860767231935	1951.3333333333333	304.55108779868954	012345	0.09701790744469493	Eueides	0.097768962862	1	1	1
OG_10856.Heliconius	OG_10856	Nymphalidae	FBgn0038342	41888	B9d1	59	577.728813559322	266.285295616007	529.9830508474577	68.7765952320212	012345	0.08886007753904338	Heliconius	0.0238449778144	1	1	1
OG_10856.EueidesHeliconius	OG_10856	Nymphalidae	FBgn0038342	41888	B9d1	59	577.728813559322	266.285295616007	529.9830508474577	68.7765952320212	012345	0.08886007753904338	EueidesHeliconius	0.0769899676712	1	1	1
OG_10856.Heliconiini	OG_10856	Nymphalidae	FBgn0038342	41888	B9d1	59	577.728813559322	266.285295616007	529.9830508474577	68.7765952320212	012345	0.08886007753904338	Heliconiini	3.95708803563	0.0204263360305	0.351196027808	1
OG_10856.DioneAgraulisEueidesHeliconius	OG_10856	Nymphalidae	FBgn0038342	41888	B9d1	59	577.728813559322	266.285295616007	529.9830508474577	68.7765952320212	012345	0.08886007753904338	DioneAgraulisEueidesHeliconius	0	1	1	1
OG_10856.Eueides	OG_10856	Nymphalidae	FBgn0038342	41888	B9d1	59	577.728813559322	266.285295616007	529.9830508474577	68.7765952320212	012345	0.08886007753904338	Eueides	0.158121649656	1	1	1
OG_10857.Heliconius	OG_10857	Nymphalidae	sp|P31674|RS15_ORYSJ	-	-	58	483.98275862068965	77.70578715840443	391.55172413793105	32.14362832436523	012345	0.02004461746899123	Heliconius	0	1	1	1
OG_10857.EueidesHeliconius	OG_10857	Nymphalidae	sp|P31674|RS15_ORYSJ	-	-	58	483.98275862068965	77.70578715840443	391.55172413793105	32.14362832436523	012345	0.02004461746899123	EueidesHeliconius	0	1	1	1
OG_10857.Heliconiini	OG_10857	Nymphalidae	sp|P31674|RS15_ORYSJ	-	-	58	483.98275862068965	77.70578715840443	391.55172413793105	32.14362832436523	012345	0.02004461746899123	Heliconiini	0	1	1	1
OG_10857.DioneAgraulisEueidesHeliconius	OG_10857	Nymphalidae	sp|P31674|RS15_ORYSJ	-	-	58	483.98275862068965	77.70578715840443	391.55172413793105	32.14362832436523	012345	0.02004461746899123	DioneAgraulisEueidesHeliconius	0	1	1	1
OG_10857.Eueides	OG_10857	Nymphalidae	sp|P31674|RS15_ORYSJ	-	-	58	483.98275862068965	77.70578715840443	391.55172413793105	32.14362832436523	012345	0.02004461746899123	Eueides	0	1	1	1
OG_1087.Heliconius	OG_1087	Nymphalidae	FBgn0038268	41797	CG3631	60	1426.85	522.0888118893183	1117.2	145.8446433709514	012345	0.09752984989515825	Heliconius	4.3620681292	0.0404800255626	0.204526340516	1
OG_1087.EueidesHeliconius	OG_1087	Nymphalidae	FBgn0038268	41797	CG3631	60	1426.85	522.0888118893183	1117.2	145.8446433709514	012345	0.09752984989515825	EueidesHeliconius	0	1	1	1
OG_1087.Heliconiini	OG_1087	Nymphalidae	FBgn0038268	41797	CG3631	60	1426.85	522.0888118893183	1117.2	145.8446433709514	012345	0.09752984989515825	Heliconiini	0.0691759238133	1	1	1
OG_1087.DioneAgraulisEueidesHeliconius	OG_1087	Nymphalidae	FBgn0038268	41797	CG3631	60	1426.85	522.0888118893183	1117.2	145.8446433709514	012345	0.09752984989515825	DioneAgraulisEueidesHeliconius	0.0267760345251	1	1	1
OG_1087.Eueides	OG_1087	Nymphalidae	FBgn0038268	41797	CG3631	60	1426.85	522.0888118893183	1117.2	145.8446433709514	012345	0.09752984989515825	Eueides	0.0722402335865	1	1	1
OG_10877.Heliconius	OG_10877	Nymphalidae	sp|P58872|RHBL3_HUMAN	-	-	50	534.06	91.55750324249783	424.08	46.25357932095634	010010	0.03250824301932313	Heliconius	0.0964021086205	1	1	1
OG_10877.EueidesHeliconius	OG_10877	Nymphalidae	sp|P58872|RHBL3_HUMAN	-	-	50	534.06	91.55750324249783	424.08	46.25357932095634	010010	0.03250824301932313	EueidesHeliconius	0	1	1	1
OG_10877.Heliconiini	OG_10877	Nymphalidae	sp|P58872|RHBL3_HUMAN	-	-	50	534.06	91.55750324249783	424.08	46.25357932095634	010010	0.03250824301932313	Heliconiini	0.0294709863449	1	1	1
OG_10877.DioneAgraulisEueidesHeliconius	OG_10877	Nymphalidae	sp|P58872|RHBL3_HUMAN	-	-	50	534.06	91.55750324249783	424.08	46.25357932095634	010010	0.03250824301932313	DioneAgraulisEueidesHeliconius	0.148192155281	1	1	1
OG_10877.Eueides	OG_10877	Nymphalidae	sp|P58872|RHBL3_HUMAN	-	-	50	534.06	91.55750324249783	424.08	46.25357932095634	010010	0.03250824301932313	Eueides	0	1	1	1
OG_1088.Heliconius	OG_1088	Nymphalidae	FBgn0040078	53439	pont	63	1325.7619047619048	225.02844365438506	1286.7142857142858	186.8931813215501	012345	0.01224220381402791	Heliconius	0	1	1	1
OG_1088.EueidesHeliconius	OG_1088	Nymphalidae	FBgn0040078	53439	pont	63	1325.7619047619048	225.02844365438506	1286.7142857142858	186.8931813215501	012345	0.01224220381402791	EueidesHeliconius	0.0129277239087	1	1	1
OG_1088.Heliconiini	OG_1088	Nymphalidae	FBgn0040078	53439	pont	63	1325.7619047619048	225.02844365438506	1286.7142857142858	186.8931813215501	012345	0.01224220381402791	Heliconiini	0.0134585937565	1	1	1
OG_1088.DioneAgraulisEueidesHeliconius	OG_1088	Nymphalidae	FBgn0040078	53439	pont	63	1325.7619047619048	225.02844365438506	1286.7142857142858	186.8931813215501	012345	0.01224220381402791	DioneAgraulisEueidesHeliconius	0	1	1	1
OG_1088.Eueides	OG_1088	Nymphalidae	FBgn0040078	53439	pont	63	1325.7619047619048	225.02844365438506	1286.7142857142858	186.8931813215501	012345	0.01224220381402791	Eueides	0	1	1	1
OG_10898.Heliconius	OG_10898	Nymphalidae	sp|Q9QYX7|PCLO_MOUSE	-	-	63	3165.8571428571427	583.4825076509954	3006.714285714286	572.328006425315	012345	0.1995839044247005	Heliconius	0.182859946212	1	1	1
OG_10898.EueidesHeliconius	OG_10898	Nymphalidae	sp|Q9QYX7|PCLO_MOUSE	-	-	63	3165.8571428571427	583.4825076509954	3006.714285714286	572.328006425315	012345	0.1995839044247005	EueidesHeliconius	0.256843482815	1	1	1
OG_10898.Heliconiini	OG_10898	Nymphalidae	sp|Q9QYX7|PCLO_MOUSE	-	-	63	3165.8571428571427	583.4825076509954	3006.714285714286	572.328006425315	012345	0.1995839044247005	Heliconiini	1.52053776792	0.162645656988	0.210841744798	1
OG_10898.DioneAgraulisEueidesHeliconius	OG_10898	Nymphalidae	sp|Q9QYX7|PCLO_MOUSE	-	-	63	3165.8571428571427	583.4825076509954	3006.714285714286	572.328006425315	012345	0.1995839044247005	DioneAgraulisEueidesHeliconius	0.0987303451311	1	1	1
OG_10898.Eueides	OG_10898	Nymphalidae	sp|Q9QYX7|PCLO_MOUSE	-	-	63	3165.8571428571427	583.4825076509954	3006.714285714286	572.328006425315	012345	0.1995839044247005	Eueides	0.228340774114	1	1	1
OG_1091.Heliconius	OG_1091	Heliconiinae	FBgn0000261	40048	Cat	56	1561.8214285714287	323.6708042762219	1505.1964285714287	86.43193433540165	012230	0.05564395248838044	Heliconius	0.0159567875788	1	1	1
OG_1091.EueidesHeliconius	OG_1091	Heliconiinae	FBgn0000261	40048	Cat	56	1561.8214285714287	323.6708042762219	1505.1964285714287	86.43193433540165	012230	0.05564395248838044	EueidesHeliconius	0.0126422901364	1	1	1
OG_1091.Eueides	OG_1091	Heliconiinae	FBgn0000261	40048	Cat	56	1561.8214285714287	323.6708042762219	1505.1964285714287	86.43193433540165	012230	0.05564395248838044	Eueides	0.0315321022105	1	1	1
OG_10910.Heliconius	OG_10910	EueidesHeliconius	-	47757	-	24	698.125	109.82991111259264	558.0	41.060930335295616	012345	1.221279578816669	Heliconius	1.03659881203	1	0.493495838993	0.493495838993
OG_10913.Heliconius	OG_10913	Nymphalidae	sp|Q09225|NRF6_CAEEL	-	-	62	2076.2419354838707	485.6313710665693	1845.483870967742	435.9624037480638	012345	0.1781396738457688	Heliconius	0.189338492573	1	1	1
OG_10913.EueidesHeliconius	OG_10913	Nymphalidae	sp|Q09225|NRF6_CAEEL	-	-	62	2076.2419354838707	485.6313710665693	1845.483870967742	435.9624037480638	012345	0.1781396738457688	EueidesHeliconius	0.133270826918	1	1	1
OG_10913.Heliconiini	OG_10913	Nymphalidae	sp|Q09225|NRF6_CAEEL	-	-	62	2076.2419354838707	485.6313710665693	1845.483870967742	435.9624037480638	012345	0.1781396738457688	Heliconiini	0.548397596855	0.214611245341	1	1
OG_10913.DioneAgraulisEueidesHeliconius	OG_10913	Nymphalidae	sp|Q09225|NRF6_CAEEL	-	-	62	2076.2419354838707	485.6313710665693	1845.483870967742	435.9624037480638	012345	0.1781396738457688	DioneAgraulisEueidesHeliconius	0.216947216552	1	1	1
OG_10913.Eueides	OG_10913	Nymphalidae	sp|Q09225|NRF6_CAEEL	-	-	62	2076.2419354838707	485.6313710665693	1845.483870967742	435.9624037480638	012345	0.1781396738457688	Eueides	0.219308662653	1	1	1
OG_10916.Heliconius	OG_10916	EueidesHeliconius	sp|O06747|YITL_BACSU	-	-	42	490.2142857142857	149.3099262662488	371.07142857142856	26.369528642285708	010020	0.3200801588055071	Heliconius	0.149497721063	1	1	1
OG_10920.Heliconius	OG_10920	Nymphalidae	sp|Q9CQA6|CHCH1_MOUSE	-	-	55	372.54545454545456	28.962557761118333	366.3818181818182	21.37499891257065	012230	0.0547236105556226	Heliconius	0	1	1	1
OG_10920.EueidesHeliconius	OG_10920	Nymphalidae	sp|Q9CQA6|CHCH1_MOUSE	-	-	55	372.54545454545456	28.962557761118333	366.3818181818182	21.37499891257065	012230	0.0547236105556226	EueidesHeliconius	0.0255675825653	1	1	1
OG_10920.Heliconiini	OG_10920	Nymphalidae	sp|Q9CQA6|CHCH1_MOUSE	-	-	55	372.54545454545456	28.962557761118333	366.3818181818182	21.37499891257065	012230	0.0547236105556226	Heliconiini	0.141619937156	1	1	1
OG_10920.DioneAgraulisEueidesHeliconius	OG_10920	Nymphalidae	sp|Q9CQA6|CHCH1_MOUSE	-	-	55	372.54545454545456	28.962557761118333	366.3818181818182	21.37499891257065	012230	0.0547236105556226	DioneAgraulisEueidesHeliconius	0	1	1	1
OG_10920.Eueides	OG_10920	Nymphalidae	sp|Q9CQA6|CHCH1_MOUSE	-	-	55	372.54545454545456	28.962557761118333	366.3818181818182	21.37499891257065	012230	0.0547236105556226	Eueides	0.021419207183	1	1	1
OG_10921.Heliconius	OG_10921	Nymphalidae	sp|Q63054|ICA69_RAT	-	-	59	760.0169491525423	67.2809670433292	726.7118644067797	41.55578274530315	012345	0.1576628261980643	Heliconius	0.150838986749	1	1	1
OG_10921.EueidesHeliconius	OG_10921	Nymphalidae	sp|Q63054|ICA69_RAT	-	-	59	760.0169491525423	67.2809670433292	726.7118644067797	41.55578274530315	012345	0.1576628261980643	EueidesHeliconius	6.09181812878	0.0500754070009	0.141131666276	0.564526665103
OG_10921.Heliconiini	OG_10921	Nymphalidae	sp|Q63054|ICA69_RAT	-	-	59	760.0169491525423	67.2809670433292	726.7118644067797	41.55578274530315	012345	0.1576628261980643	Heliconiini	0.0403456871272	1	1	1
OG_10921.Eueides	OG_10921	Nymphalidae	sp|Q63054|ICA69_RAT	-	-	59	760.0169491525423	67.2809670433292	726.7118644067797	41.55578274530315	012345	0.1576628261980643	Eueides	0.102529498628	1	1	1
OG_10922.Heliconius	OG_10922	Nymphalidae	sp|Q01617|CPO_DROME	-	-	60	1094.85	340.936251372599	810.85	134.25471127673694	012230	0.07274879004219655	Heliconius	0.0638246108071	1	1	1
OG_10922.EueidesHeliconius	OG_10922	Nymphalidae	sp|Q01617|CPO_DROME	-	-	60	1094.85	340.936251372599	810.85	134.25471127673694	012230	0.07274879004219655	EueidesHeliconius	0.0790954346549	1	1	1
OG_10922.Heliconiini	OG_10922	Nymphalidae	sp|Q01617|CPO_DROME	-	-	60	1094.85	340.936251372599	810.85	134.25471127673694	012230	0.07274879004219655	Heliconiini	0.0286756907539	1	1	1
OG_10922.DioneAgraulisEueidesHeliconius	OG_10922	Nymphalidae	sp|Q01617|CPO_DROME	-	-	60	1094.85	340.936251372599	810.85	134.25471127673694	012230	0.07274879004219655	DioneAgraulisEueidesHeliconius	0.0367748004005	1	1	1
OG_10922.Eueides	OG_10922	Nymphalidae	sp|Q01617|CPO_DROME	-	-	60	1094.85	340.936251372599	810.85	134.25471127673694	012230	0.07274879004219655	Eueides	0	1	1	1
OG_10923.Heliconius	OG_10923	Nymphalidae	sp|Q9QYX7|PCLO_MOUSE	-	-	35	859.9714285714285	251.444226785332	609.6857142857143	176.69695953865215	012345	0.205201201197738	Heliconius	0.146157537599	1	1	1
OG_10923.EueidesHeliconius	OG_10923	Nymphalidae	sp|Q9QYX7|PCLO_MOUSE	-	-	35	859.9714285714285	251.444226785332	609.6857142857143	176.69695953865215	012345	0.205201201197738	EueidesHeliconius	0.331086059574	1	1	1
OG_10923.DioneAgraulisEueidesHeliconius	OG_10923	Nymphalidae	sp|Q9QYX7|PCLO_MOUSE	-	-	35	859.9714285714285	251.444226785332	609.6857142857143	176.69695953865215	012345	0.205201201197738	DioneAgraulisEueidesHeliconius	272.169900263	0.0250799432947	1.23921796601e-05	4.95687186406e-05
OG_10923.Eueides	OG_10923	Nymphalidae	sp|Q9QYX7|PCLO_MOUSE	-	-	35	859.9714285714285	251.444226785332	609.6857142857143	176.69695953865215	012345	0.205201201197738	Eueides	18.3602986966	0.0484905625303	0.000443471065494	0.00133041319648
OG_10924.Heliconius	OG_10924	Heliconiinae	sp|P85195|CU01_LONON	-	-	53	570.9622641509434	282.06308422348724	430.8679245283019	12.32429375043999	012345	0.1510669488568972	Heliconius	0.129553410874	1	1	1
OG_10924.EueidesHeliconius	OG_10924	Heliconiinae	sp|P85195|CU01_LONON	-	-	53	570.9622641509434	282.06308422348724	430.8679245283019	12.32429375043999	012345	0.1510669488568972	EueidesHeliconius	33.800901384	0.00806512509761	0.0421918459826	0.16876738393
OG_10924.DioneAgraulisEueidesHeliconius	OG_10924	Heliconiinae	sp|P85195|CU01_LONON	-	-	53	570.9622641509434	282.06308422348724	430.8679245283019	12.32429375043999	012345	0.1510669488568972	DioneAgraulisEueidesHeliconius	0	1	1	1
OG_10924.Eueides	OG_10924	Heliconiinae	sp|P85195|CU01_LONON	-	-	53	570.9622641509434	282.06308422348724	430.8679245283019	12.32429375043999	012345	0.1510669488568972	Eueides	0.167616848108	1	1	1
OG_10940.Heliconius	OG_10940	Nymphalidae	sp|P94464|RSMB_BACSU	-	-	63	1183.7619047619048	227.17622795696042	1140.047619047619	222.4817758594379	012345	0.1329925702891811	Heliconius	0.0900138704956	1	1	1
OG_10940.EueidesHeliconius	OG_10940	Nymphalidae	sp|P94464|RSMB_BACSU	-	-	63	1183.7619047619048	227.17622795696042	1140.047619047619	222.4817758594379	012345	0.1329925702891811	EueidesHeliconius	0.0861072138034	1	1	1
OG_10940.Heliconiini	OG_10940	Nymphalidae	sp|P94464|RSMB_BACSU	-	-	63	1183.7619047619048	227.17622795696042	1140.047619047619	222.4817758594379	012345	0.1329925702891811	Heliconiini	0.0969907389726	1	1	1
OG_10940.DioneAgraulisEueidesHeliconius	OG_10940	Nymphalidae	sp|P94464|RSMB_BACSU	-	-	63	1183.7619047619048	227.17622795696042	1140.047619047619	222.4817758594379	012345	0.1329925702891811	DioneAgraulisEueidesHeliconius	22.6479633514	0.0279045538992	0.0928154045754	0.464077022877
OG_10940.Eueides	OG_10940	Nymphalidae	sp|P94464|RSMB_BACSU	-	-	63	1183.7619047619048	227.17622795696042	1140.047619047619	222.4817758594379	012345	0.1329925702891811	Eueides	0.206589478803	1	1	1
OG_10953.Eueides_Eali	OG_10953	EueidesHeliconius	sp|O49292|PPD4_ARATH	-	-	27	352.55555555555554	50.828931199795846	322.44444444444446	19.585204796314496	010020	0.5120474077119109	Eueides	0.0890661122213	1	1	1
OG_10958.EueidesHeliconius	OG_10958	Nymphalidae	sp|Q8JZX4|SPF45_MOUSE	-	-	62	1131.2903225806451	137.2127365357818	1081.741935483871	170.08716318442399	012345	0.05001320157044669	EueidesHeliconius	0.032480387092	1	1	1
OG_10958.Heliconiini	OG_10958	Nymphalidae	sp|Q8JZX4|SPF45_MOUSE	-	-	62	1131.2903225806451	137.2127365357818	1081.741935483871	170.08716318442399	012345	0.05001320157044669	Heliconiini	0.0316491164449	1	1	1
OG_10958.DioneAgraulisEueidesHeliconius	OG_10958	Nymphalidae	sp|Q8JZX4|SPF45_MOUSE	-	-	62	1131.2903225806451	137.2127365357818	1081.741935483871	170.08716318442399	012345	0.05001320157044669	DioneAgraulisEueidesHeliconius	46.3230870246	0.00520557843538	0.0442476161584	0.132742848475
OG_10959.Heliconius	OG_10959	Nymphalidae	FBgn0039678	43488	Obp99a	57	649.7368421052631	250.32964416529347	459.63157894736844	82.94780256365146	012230	0.216707022433396	Heliconius	1.48769923825	1	0.426376924444	0.852753848888
OG_10959.EueidesHeliconius	OG_10959	Nymphalidae	FBgn0039678	43488	Obp99a	57	649.7368421052631	250.32964416529347	459.63157894736844	82.94780256365146	012230	0.216707022433396	EueidesHeliconius	361.573707474	0.00737312132261	0.0248479602375	0.0993918409499
OG_10959.Heliconiini	OG_10959	Nymphalidae	FBgn0039678	43488	Obp99a	57	649.7368421052631	250.32964416529347	459.63157894736844	82.94780256365146	012230	0.216707022433396	Heliconiini	0.116638866063	1	1	1
OG_10959.Eueides	OG_10959	Nymphalidae	FBgn0039678	43488	Obp99a	57	649.7368421052631	250.32964416529347	459.63157894736844	82.94780256365146	012230	0.216707022433396	Eueides	10000000000	1	0.286375864492	0.859127593476
OG_1096.Heliconius	OG_1096	Nymphalidae	FBgn0037144	40441	CG7458	58	1503.7241379310344	191.56009168849633	1475.0172413793102	208.77157054602066	012345	0.07194305638033795	Heliconius	0.0352426760688	1	1	1
OG_1096.EueidesHeliconius	OG_1096	Nymphalidae	FBgn0037144	40441	CG7458	58	1503.7241379310344	191.56009168849633	1475.0172413793102	208.77157054602066	012345	0.07194305638033795	EueidesHeliconius	0.0290425748398	1	1	1
OG_1096.Heliconiini	OG_1096	Nymphalidae	FBgn0037144	40441	CG7458	58	1503.7241379310344	191.56009168849633	1475.0172413793102	208.77157054602066	012345	0.07194305638033795	Heliconiini	1.57837640132	0.0964818373674	0.368723079097	1
OG_1096.DioneAgraulisEueidesHeliconius	OG_1096	Nymphalidae	FBgn0037144	40441	CG7458	58	1503.7241379310344	191.56009168849633	1475.0172413793102	208.77157054602066	012345	0.07194305638033795	DioneAgraulisEueidesHeliconius	0.0330189820466	1	1	1
OG_1096.Eueides	OG_1096	Nymphalidae	FBgn0037144	40441	CG7458	58	1503.7241379310344	191.56009168849633	1475.0172413793102	208.77157054602066	012345	0.07194305638033795	Eueides	0.0746707928766	1	1	1
OG_1098.Heliconius	OG_1098	Nymphalidae	FBgn0022768	31404	Pp2C1	63	2068.3333333333335	597.9595728756675	1711.0	397.2476737322879	012230	0.09841210571014651	Heliconius	0.0820037947366	1	1	1
OG_1098.EueidesHeliconius	OG_1098	Nymphalidae	FBgn0022768	31404	Pp2C1	63	2068.3333333333335	597.9595728756675	1711.0	397.2476737322879	012230	0.09841210571014651	EueidesHeliconius	163.104627688	0.00379897712962	0.0119208801822	0.0596044009112
OG_1098.Heliconiini	OG_1098	Nymphalidae	FBgn0022768	31404	Pp2C1	63	2068.3333333333335	597.9595728756675	1711.0	397.2476737322879	012230	0.09841210571014651	Heliconiini	4.62971987727	0.0344215053746	0.097772349667	0.391089398668
OG_1098.DioneAgraulisEueidesHeliconius	OG_1098	Nymphalidae	FBgn0022768	31404	Pp2C1	63	2068.3333333333335	597.9595728756675	1711.0	397.2476737322879	012230	0.09841210571014651	DioneAgraulisEueidesHeliconius	0.0746317778544	1	1	1
OG_1098.Eueides	OG_1098	Nymphalidae	FBgn0022768	31404	Pp2C1	63	2068.3333333333335	597.9595728756675	1711.0	397.2476737322879	012230	0.09841210571014651	Eueides	1.90824816782	0.0563021476672	0.285189818633	0.855569455899
OG_1100.Heliconius	OG_1100	Nymphalidae	FBgn0031359	33350	Rim2	63	976.0	269.79992587100537	923.2380952380952	235.85284047107987	012345	0.03252903508753689	Heliconius	0.0156978590003	1	1	1
OG_1100.EueidesHeliconius	OG_1100	Nymphalidae	FBgn0031359	33350	Rim2	63	976.0	269.79992587100537	923.2380952380952	235.85284047107987	012345	0.03252903508753689	EueidesHeliconius	0	1	1	1
OG_1100.Heliconiini	OG_1100	Nymphalidae	FBgn0031359	33350	Rim2	63	976.0	269.79992587100537	923.2380952380952	235.85284047107987	012345	0.03252903508753689	Heliconiini	1557.69953571	0.00569245254847	0.0485857900543	0.242928950271
OG_1100.DioneAgraulisEueidesHeliconius	OG_1100	Nymphalidae	FBgn0031359	33350	Rim2	63	976.0	269.79992587100537	923.2380952380952	235.85284047107987	012345	0.03252903508753689	DioneAgraulisEueidesHeliconius	0	1	1	1
OG_1100.Eueides	OG_1100	Nymphalidae	FBgn0031359	33350	Rim2	63	976.0	269.79992587100537	923.2380952380952	235.85284047107987	012345	0.03252903508753689	Eueides	0.0460337924822	1	1	1
OG_11008.Heliconius	OG_11008	Nymphalidae	FBgn0034503	37305	MED8	62	1400.225806451613	421.84913292186616	1337.1290322580646	153.88962151081176	012345	0.04958459449542032	Heliconius	0.160790182211	1	1	1
OG_11008.EueidesHeliconius	OG_11008	Nymphalidae	FBgn0034503	37305	MED8	62	1400.225806451613	421.84913292186616	1337.1290322580646	153.88962151081176	012345	0.04958459449542032	EueidesHeliconius	0.0293682934385	1	1	1
OG_11008.Heliconiini	OG_11008	Nymphalidae	FBgn0034503	37305	MED8	62	1400.225806451613	421.84913292186616	1337.1290322580646	153.88962151081176	012345	0.04958459449542032	Heliconiini	0.650324773657	0.0545403492405	1	1
OG_11008.DioneAgraulisEueidesHeliconius	OG_11008	Nymphalidae	FBgn0034503	37305	MED8	62	1400.225806451613	421.84913292186616	1337.1290322580646	153.88962151081176	012345	0.04958459449542032	DioneAgraulisEueidesHeliconius	0.0949666890126	1	1	1
OG_11008.Eueides	OG_11008	Nymphalidae	FBgn0034503	37305	MED8	62	1400.225806451613	421.84913292186616	1337.1290322580646	153.88962151081176	012345	0.04958459449542032	Eueides	0.0601514562116	1	1	1
OG_11018.Eueides_Elyb	OG_11018	Heliconiini	sp|O44952|LONM_CAEEL	-	-	44	447.40909090909093	36.22424990240289	415.02272727272725	22.694100791699185	012345	0.1478270285153147	Eueides	100000	0.0398762969959	0.174398490293	0.52319547088
OG_11018.EueidesHeliconius	OG_11018	Heliconiini	sp|O44952|LONM_CAEEL	-	-	44	447.40909090909093	36.22424990240289	415.02272727272725	22.694100791699185	012345	0.1478270285153147	EueidesHeliconius	0.0644967204942	1	1	1
OG_11018.Heliconius	OG_11018	Heliconiini	sp|O44952|LONM_CAEEL	-	-	44	447.40909090909093	36.22424990240289	415.02272727272725	22.694100791699185	012345	0.1478270285153147	Heliconius	5.48080295017	0.0900325104029	0.5	1
OG_1102.Heliconius	OG_1102	Nymphalidae	FBgn0001220	36583	Hsc70-5	61	1932.983606557377	372.5464209958657	1862.360655737705	374.3745399422176	012230	0.02226682536724268	Heliconius	0.00914030774868	1	1	1
OG_1102.EueidesHeliconius	OG_1102	Nymphalidae	FBgn0001220	36583	Hsc70-5	61	1932.983606557377	372.5464209958657	1862.360655737705	374.3745399422176	012230	0.02226682536724268	EueidesHeliconius	3.20276250697	0.01206862137	0.218264392315	0.873057569259
OG_1102.Heliconiini	OG_1102	Nymphalidae	FBgn0001220	36583	Hsc70-5	61	1932.983606557377	372.5464209958657	1862.360655737705	374.3745399422176	012230	0.02226682536724268	Heliconiini	0.01456194027	1	1	1
OG_1102.DioneAgraulisEueidesHeliconius	OG_1102	Nymphalidae	FBgn0001220	36583	Hsc70-5	61	1932.983606557377	372.5464209958657	1862.360655737705	374.3745399422176	012230	0.02226682536724268	DioneAgraulisEueidesHeliconius	1557.69953571	0.00193529386879	0.0112961243873	0.0564806219364
OG_1102.Eueides	OG_1102	Nymphalidae	FBgn0001220	36583	Hsc70-5	61	1932.983606557377	372.5464209958657	1862.360655737705	374.3745399422176	012230	0.02226682536724268	Eueides	0	1	1	1
OG_11021.Heliconius	OG_11021	Nymphalidae	FBgn0032949	35411	Lamp1	59	1013.3389830508474	318.8278644102324	899.9491525423729	207.27026684073857	012310	0.1388355936451588	Heliconius	0.120109165746	1	1	1
OG_11021.EueidesHeliconius	OG_11021	Nymphalidae	FBgn0032949	35411	Lamp1	59	1013.3389830508474	318.8278644102324	899.9491525423729	207.27026684073857	012310	0.1388355936451588	EueidesHeliconius	10.8132736485	0.0125708608952	0.126197663502	0.504790654008
OG_11021.Heliconiini	OG_11021	Nymphalidae	FBgn0032949	35411	Lamp1	59	1013.3389830508474	318.8278644102324	899.9491525423729	207.27026684073857	012310	0.1388355936451588	Heliconiini	0.0739586131411	1	1	1
OG_11021.DioneAgraulisEueidesHeliconius	OG_11021	Nymphalidae	FBgn0032949	35411	Lamp1	59	1013.3389830508474	318.8278644102324	899.9491525423729	207.27026684073857	012310	0.1388355936451588	DioneAgraulisEueidesHeliconius	485.712736917	0.0179048517526	0.0075156267037	0.0375781335185
OG_11021.Eueides	OG_11021	Nymphalidae	FBgn0032949	35411	Lamp1	59	1013.3389830508474	318.8278644102324	899.9491525423729	207.27026684073857	012310	0.1388355936451588	Eueides	0.196771280417	1	1	1
OG_11022.Heliconius	OG_11022	Nymphalidae	FBgn0032946	35408	nrv3	63	1057.6190476190477	341.84659274376503	866.2380952380952	166.5618445880159	010020	0.08041512593638192	Heliconius	0.0167206142951	1	1	1
OG_11022.EueidesHeliconius	OG_11022	Nymphalidae	FBgn0032946	35408	nrv3	63	1057.6190476190477	341.84659274376503	866.2380952380952	166.5618445880159	010020	0.08041512593638192	EueidesHeliconius	0.0377197036936	1	1	1
OG_11022.Heliconiini	OG_11022	Nymphalidae	FBgn0032946	35408	nrv3	63	1057.6190476190477	341.84659274376503	866.2380952380952	166.5618445880159	010020	0.08041512593638192	Heliconiini	2.71636592252	0.0177608416483	0.329903943248	1
OG_11022.DioneAgraulisEueidesHeliconius	OG_11022	Nymphalidae	FBgn0032946	35408	nrv3	63	1057.6190476190477	341.84659274376503	866.2380952380952	166.5618445880159	010020	0.08041512593638192	DioneAgraulisEueidesHeliconius	0	1	1	1
OG_11022.Eueides	OG_11022	Nymphalidae	FBgn0032946	35408	nrv3	63	1057.6190476190477	341.84659274376503	866.2380952380952	166.5618445880159	010020	0.08041512593638192	Eueides	0.0258457642165	1	1	1
OG_11023.Heliconius	OG_11023	Nymphalidae	FBgn0015777	33953	nrv2	59	858.9152542372881	354.8131658333216	722.0338983050848	159.93165554112562	012345	0.06526458639459677	Heliconius	0	1	1	1
OG_11023.EueidesHeliconius	OG_11023	Nymphalidae	FBgn0015777	33953	nrv2	59	858.9152542372881	354.8131658333216	722.0338983050848	159.93165554112562	012345	0.06526458639459677	EueidesHeliconius	0	1	1	1
OG_11023.Heliconiini	OG_11023	Nymphalidae	FBgn0015777	33953	nrv2	59	858.9152542372881	354.8131658333216	722.0338983050848	159.93165554112562	012345	0.06526458639459677	Heliconiini	567.407518502	0.0141344427799	0.0941024463634	0.470512231817
OG_11023.DioneAgraulisEueidesHeliconius	OG_11023	Nymphalidae	FBgn0015777	33953	nrv2	59	858.9152542372881	354.8131658333216	722.0338983050848	159.93165554112562	012345	0.06526458639459677	DioneAgraulisEueidesHeliconius	0	1	1	1
OG_11023.Eueides	OG_11023	Nymphalidae	FBgn0015777	33953	nrv2	59	858.9152542372881	354.8131658333216	722.0338983050848	159.93165554112562	012345	0.06526458639459677	Eueides	0	1	1	1
OG_11027.Heliconius	OG_11027	Heliconiinae	sp|P46950|SNG1_YEAST	-	-	44	489.0	63.43034834295876	446.3863636363636	39.17572062868607	012345	0.1874486797680446	Heliconius	0.189024839169	1	1	1
OG_11027.Eueides	OG_11027	Heliconiinae	sp|P46950|SNG1_YEAST	-	-	44	489.0	63.43034834295876	446.3863636363636	39.17572062868607	012345	0.1874486797680446	Eueides	0.0312411466366	1	1	1
OG_11036.Heliconius	OG_11036	Nymphalidae	sp|Q3TPR7|T184C_MOUSE	-	-	61	958.327868852459	203.91429582792668	902.7540983606557	213.40261769083762	010010	0.1046937576437267	Heliconius	20.4676479592	0.00919423229814	0.0460912648762	0.184365059505
OG_11036.EueidesHeliconius	OG_11036	Nymphalidae	sp|Q3TPR7|T184C_MOUSE	-	-	61	958.327868852459	203.91429582792668	902.7540983606557	213.40261769083762	010010	0.1046937576437267	EueidesHeliconius	0.0741889501045	1	1	1
OG_11036.Heliconiini	OG_11036	Nymphalidae	sp|Q3TPR7|T184C_MOUSE	-	-	61	958.327868852459	203.91429582792668	902.7540983606557	213.40261769083762	010010	0.1046937576437267	Heliconiini	0.0474833412369	1	1	1
OG_11036.Eueides	OG_11036	Nymphalidae	sp|Q3TPR7|T184C_MOUSE	-	-	61	958.327868852459	203.91429582792668	902.7540983606557	213.40261769083762	010010	0.1046937576437267	Eueides	0.0591830282787	1	1	1
OG_11039.Heliconius	OG_11039	Heliconiini	-	47757	-	49	483.3673469387755	186.8076271088054	435.1224489795918	21.047693802663087	010020	0.1517082147184131	Heliconius	0	1	1	1
OG_11039.EueidesHeliconius	OG_11039	Heliconiini	-	47757	-	49	483.3673469387755	186.8076271088054	435.1224489795918	21.047693802663087	010020	0.1517082147184131	EueidesHeliconius	0.131058459382	1	1	1
OG_11039.DioneAgraulisEueidesHeliconius	OG_11039	Heliconiini	-	47757	-	49	483.3673469387755	186.8076271088054	435.1224489795918	21.047693802663087	010020	0.1517082147184131	DioneAgraulisEueidesHeliconius	0.112550840318	1	1	1
OG_11039.Eueides	OG_11039	Heliconiini	-	47757	-	49	483.3673469387755	186.8076271088054	435.1224489795918	21.047693802663087	010020	0.1517082147184131	Eueides	0.0889859843842	1	1	1
OG_1105.Heliconius	OG_1105	Nymphalidae	FBgn0035491	38480	Dpy-30L2	59	1875.9661016949153	220.44469432872407	1843.8305084745762	240.1061313741702	012345	0.1310424135446524	Heliconius	0.097802157589	1	1	1
[truncated: 13,120 more rows]

## Sheet: Table S8
Heliconiini [Gostats ∩ GOATOOLS] 21 BPs & 9 MFs
# GOTerm	NS	enrichment	name	ratio_in_study	ratio_in_pop	p_uncorrected	depth	study_count	p_bonferroni	p_sidak	p_holm	p_fdr_bh	study_items
[truncated: 155 more rows]

## Sheet: Table S9
Heliconiini [geneMANIA] 0 BPs [Nodes=62 Interactions=410 Density=0.22] & 10 MFs [Nodes=62 Interactions=320 Density=0.17]
[truncated: 121 more rows]

[truncated: 2 more sheets: Table S10, Table S11]
